# Supplementary material for: Whole-genome bisulfite sequencing reveals the function of DNA methylation in the allotransplantation immunity of pearl oysters
Source: Front Immunol. 2023 Oct 3;14:1247544. doi: 10.3389/fimmu.2023.1247544 (PMC10579932; doi:10.3389/fimmu.2023.1247544)
Supplement: Supplementary file 5 [file DataSheet_5.xlsx]

## Sheet: Con
Methylation site distribution information
Chromosome ID	Position	+/- chain	cytosine pattern (CG/CHH/CHG)	cytosine sequence context	copy number : the same value as rep_rate from qmap file colum 11	methyl-reads num	non-methyl-reads num	Binomial distribution expected values
PIN_pilon_hic_scaffold_9	54533614	-	CG	ACGTT	1	3	2	2	0.00098015
PIN_pilon_hic_scaffold_9	54533624	+	CG	TACGT	1	4	3	2	0.00203104
PIN_pilon_hic_scaffold_9	54533625	-	CG	ACGTT	1	4	2	2	0.00146045
PIN_pilon_hic_scaffold_9	54533639	+	CG	TTCGT	1	3	2	2	0.00098015
PIN_pilon_hic_scaffold_9	54533646	+	CG	TACGT	1	5	1	2	0.00146045
PIN_pilon_hic_scaffold_9	54533647	-	CG	ACGTT	1	5	3	2	0.00269008
PIN_pilon_hic_scaffold_9	54533674	+	CG	AACGT	1	9	3	2	0.00617454
PIN_pilon_hic_scaffold_9	54533678	+	CG	TACGT	1	8	4	2	0.00617454
PIN_pilon_hic_scaffold_9	54533679	-	CG	ACGTT	1	8	3	2	0.00517972
PIN_pilon_hic_scaffold_9	54533689	+	CG	TACGT	1	8	5	2	0.00724894
PIN_pilon_hic_scaffold_9	54533690	-	CG	ACGTT	1	7	4	2	0.00517972
PIN_pilon_hic_scaffold_9	54533716	-	CG	ACGTT	1	8	4	2	0.00617454
PIN_pilon_hic_scaffold_9	54533741	-	CG	CCGAA	1	8	4	2	0.00617454
PIN_pilon_hic_scaffold_9	54533815	-	CG	ACGAA	1	8	6	2	0.00840124

## Sheet: 6  h
Methylation site distribution information

## Sheet: 12 h
Methylation site distribution information
Chromosome ID	Position	+/- chain	cytosine pattern (CG/CHH/CHG)	cytosine sequence context	copy number : the same value as rep_rate from qmap file colum 11	methyl-reads num	non-methyl-reads num	Binomial distribution expected values
PIN_pilon_hic_scaffold_9	54533613	+	CG	CACGT	1	3	1	2	0.00059203
PIN_pilon_hic_scaffold_9	54533614	-	CG	ACGTT	1	3	2	2	0.00098015
PIN_pilon_hic_scaffold_9	54533620	+	CG	AACGT	1	3	1	2	0.00059203
PIN_pilon_hic_scaffold_9	54533624	+	CG	TACGT	1	4	1	2	0.00098015
PIN_pilon_hic_scaffold_9	54533625	-	CG	ACGTT	1	4	2	2	0.00146045
PIN_pilon_hic_scaffold_9	54533639	+	CG	TTCGT	1	6	1	2	0.00203104
PIN_pilon_hic_scaffold_9	54533646	+	CG	TACGT	1	7	1	2	0.00269008
PIN_pilon_hic_scaffold_9	54533647	-	CG	ACGTT	1	4	3	2	0.00203104
PIN_pilon_hic_scaffold_9	54533674	+	CG	AACGT	1	7	1	2	0.00269008
PIN_pilon_hic_scaffold_9	54533675	-	CG	ACGTA	1	7	3	2	0.0042662
PIN_pilon_hic_scaffold_9	54533678	+	CG	TACGT	1	8	2	2	0.0042662
PIN_pilon_hic_scaffold_9	54533679	-	CG	ACGTT	1	7	3	2	0.0042662
PIN_pilon_hic_scaffold_9	54533689	+	CG	TACGT	1	7	4	2	0.00517972
PIN_pilon_hic_scaffold_9	54533690	-	CG	ACGTT	1	9	4	2	0.00724894
PIN_pilon_hic_scaffold_9	54533715	+	CG	TACGT	1	6	4	2	0.0042662
PIN_pilon_hic_scaffold_9	54533716	-	CG	ACGTT	1	7	5	2	0.00617454
PIN_pilon_hic_scaffold_9	54533741	-	CG	CCGAA	1	6	4	2	0.0042662
PIN_pilon_hic_scaffold_9	54533814	+	CG	TACGA	1	6	5	2	0.00517972
