# Supplementary material for: Whole-genome bisulfite sequencing reveals the function of DNA methylation in the allotransplantation immunity of pearl oysters
Source: Front Immunol. 2023 Oct 3;14:1247544. doi: 10.3389/fimmu.2023.1247544 (PMC10579932; doi:10.3389/fimmu.2023.1247544)
Supplement: Supplementary file 7 [file DataSheet_7.xlsx]

## Sheet: Unique to demethylation probe
Mass spectrometry results for only non-methylated probes
Group_ID	Protein_Qscore	Protein_FDR	Protein_Mass	PeptideSeqs	PepIsUnique	Unique_Peptide_Num	Unique_Spectra_Num	Coverage	Peptide_Query	Abundance	iBAQ	Nr	Swissprot	KEGG	KOG	TrEMBL	Interpro	Interpro_ipr	GO
528_1	5.16091	NA	24208.4	GAQGVILVYDVTSR;LAIWDTAGQER	1;1	2	2	0.1163	25010;20019	4.46474e+06	372062	XP_021373295.1/1.46801e-110/ras-related protein Rab-18A-like [Mizuhopecten yessoensis] &gt;OWF40890.1 Ras-related protein Rab-18-B [Mizuhopecten yessoensis]	Q6DHC1/5e-102/RB18B_DANRE Ras-related protein Rab-18-B OS=Danio rerio OX=7955 GN=rab18b PE=2 SV=1	myi:110463212/2e-111/ras-related protein Rab-18A-like; K07910 Ras-related protein Rab-18	Hs10880989/5e-95/[R] KOG0080 GTPase Rab18, small G protein superfamily	A0A210PWM6/3e-110/A0A210PWM6_MIZYE Ras-related protein Rab-18-B OS=Mizuhopecten yessoensis OX=6573 GN=KP79_PYT19619 PE=4 SV=1	PS51419/29.925/small GTPase Rab1 family profile.	1|IPR001806; Small GTPase superfamily	molecular_function:GO:0003924//GTPase activity;GO:0005525//GTP binding;molecular_function:GO:0005525//GTP binding;GO:0003924//GTPase activity;
701_1	2.55608	NA	31330.3	FSYDFDEDR	1	1	1	0.0325	18189	163993	10249.5	XP_021366396.1/1.04264e-48/integrin beta-PS-like isoform X2 [Mizuhopecten yessoensis]	B0FYY4/8e-40/ITB1_SHEEP Integrin beta-1 OS=Ovis aries OX=9940 GN=ITGB1 PE=2 SV=1	myi:110458807/2e-49/integrin beta-PS-like isoform X1; K05719 integrin beta 1	Hs19743819/1e-40/[TW] KOG1226 Integrin beta subunit (N-terminal portion of extracellular region)	A0A210Q5V9/2e-48/A0A210Q5V9_MIZYE Integrin beta OS=Mizuhopecten yessoensis OX=6573 GN=KP79_PYT19899 PE=3 SV=1	PF07974/6.0E-6/EGF-like domain	4|IPR012896; Integrin beta subunit, tail|IPR013111; EGF-like domain, extracellular|IPR014836; Integrin beta subunit, cytoplasmic domain|IPR015812; Integrin beta subunit	biological_process:GO:0007155//cell adhesion;GO:0007229//integrin-mediated signaling pathway;cellular_component:GO:0016021//integral component of membrane;
242_1	3.03078	NA	109986	VNLAVHEDK	1	1	1	0.0093	13632	49282.1	758.186	XP_022305635.1/0/kinesin heavy chain-like [Crassostrea virginica]	P21613/0.0/KINH_DORPE Kinesin heavy chain OS=Doryteuthis pealeii OX=1051067 PE=2 SV=1	crg:105342992/0.0/kinesin heavy chain; K10396 kinesin family member 5	7302958/0.0/[Z] KOG0240 Kinesin (SMY1 subfamily)	A0A210QG15/0.0/A0A210QG15_MIZYE Kinesin-like protein OS=Mizuhopecten yessoensis OX=6573 GN=KP79_PYT19339 PE=3 SV=1	PR00380/1.8E-43/Kinesin heavy chain signature	3|IPR001752; Kinesin motor domain|IPR019821; Kinesin motor domain, conserved site|IPR027640; Kinesin-like protein	biological_process:GO:0007018//microtubule-based movement;molecular_function:GO:0003777//microtubule motor activity;GO:0005524//ATP binding;GO:0008017//microtubule binding;
591_1	4.33022	NA	133191	QLLNDNLGDEASK	1	1	1	0.0108	23867	0	0	XP_011438344.1/0/PREDICTED: ATP-citrate synthase isoform X1 [Crassostrea gigas] &gt;XP_011438345.1 PREDICTED: ATP-citrate synthase isoform X1 [Crassostrea gigas]	Q91V92/0.0/ACLY_MOUSE ATP-citrate synthase OS=Mus musculus OX=10090 GN=Acly PE=1 SV=1	crg:105335901/0.0/ATP-citrate synthase isoform X1; K01648 ATP citrate (pro-S)-lyase [EC:2.3.3.8]	Hs4501865/0.0/[C] KOG1254 ATP-citrate lyase	K1RTR1/0.0/K1RTR1_CRAGI ATP-citrate synthase OS=Crassostrea gigas OX=29159 GN=CGI_10025561 PE=3 SV=1	PF16114/1.5E-92/ATP citrate lyase citrate-binding	8|IPR002020; Citrate synthase|IPR003781; CoA-binding|IPR005811; ATP-citrate lyase/succinyl-CoA ligase|IPR013650; ATP-grasp fold, succinyl-CoA synthetase-type|IPR017440; ATP-citrate lyase/succinyl-CoA ligase, active site|IPR017866; Succinyl-CoA synthetase, beta subunit, conserved site|IPR032263; ATP-citrate synthase, citrate-binding domain|IPR033847; ATP-citrate lyase/succinyl-CoA ligase, conserve…	biological_process:GO:0008152//metabolic process;molecular_function:GO:0003824//catalytic activity;GO:0046912//transferase activity, transferring acyl groups, acyl groups converted into alkyl on transfer;GO:0048037//cofactor binding;
61_1	2.40541	NA	8959.5	LQINCVIEDDK	1	1	1	0.1325	22310	201984	50496	AAH96865.1/1.11783e-28/Eef1d protein [Danio rerio] &gt;AAI65529.1 Eef1da protein [Danio rerio]	P29693/7e-29/EF1D_XENLA Elongation factor 1-delta OS=Xenopus laevis OX=8355 GN=eef1d PE=1 SV=1	sko:100371190/5e-29/elongation factor 1-beta-like; K03232 elongation factor 1-beta	Hs18566774/1e-29/[K] KOG1668 Elongation factor 1 beta/delta chain	A0A1B6J2B5/4e-29/A0A1B6J2B5_9HEMI Uncharacterized protein (Fragment) OS=Homalodisca liturata OX=320908 GN=g.12312 PE=3 SV=1	PTHR11595:SF26/2.2E-37/--	1|IPR014038; Translation elongation factor EF1B, beta/delta subunit, guanine nucleotide exchange domain	biological_process:GO:0006414//translational elongation;molecular_function:GO:0003746//translation elongation factor activity;
827_1	2.36072	NA	70409.3	TTETGLPENEK	1	1	1	0.0177	18877	0	0	XP_021377115.1/0/zinc finger protein 622-like [Mizuhopecten yessoensis] &gt;XP_021377116.1 zinc finger protein 622-like [Mizuhopecten yessoensis] &gt;OWF39060.1 Zinc finger protein 622 [Mizuhopecten yessoensis]	Q969S3/1e-118/ZN622_HUMAN Zinc finger protein 622 OS=Homo sapiens OX=9606 GN=ZNF622 PE=1 SV=1	myi:110465537/0.0/zinc finger protein 622-like; K14816 pre-60S factor REI1	Hs15529978/4e-119/[R] KOG2785 C2H2-type Zn-finger protein	A0A210PRE5/0.0/A0A210PRE5_MIZYE Zinc finger protein 622 OS=Mizuhopecten yessoensis OX=6573 GN=KP79_PYT19803 PE=4 SV=1	PS50157/8.559/Zinc finger C2H2 type domain profile.	3|IPR003604; Matrin/U1-C-like, C2H2-type zinc finger|IPR013087; Zinc finger C2H2-type|IPR022755; Zinc finger, double-stranded RNA binding	molecular_function:GO:0003676//nucleic acid binding;GO:0008270//zinc ion binding;
230_1	11.4323	NA	125220	DFVASSVDK;QVSQLTDEDR;VVEFYGENPR	1;1;1	3	3	0.0266	12313;18130;18657	478957	6941.41	XP_022310132.1/0/formin-like protein CG32138 isoform X16 [Crassostrea virginica]	Q8IVF7/0.0/FMNL3_HUMAN Formin-like protein 3 OS=Homo sapiens OX=9606 GN=FMNL3 PE=1 SV=3	lcm:102359968/9e-79/DAAM2; dishevelled associated activator of morphogenesis 2; K04512 dishevelled associated activator of morphogenesis	7294416/0.0/[TZ] KOG1923 Rac1 GTPase effector FRL	A0A210PSF8/0.0/A0A210PSF8_MIZYE Formin-like protein 3 OS=Mizuhopecten yessoensis OX=6573 GN=KP79_PYT19829 PE=4 SV=1	PF06367/7.0E-39/Diaphanous FH3 Domain	5|IPR010472; Formin, FH3 domain|IPR010473; Formin, GTPase-binding domain|IPR014767; Diaphanous autoregulatory (DAD) domain|IPR014768; Rho GTPase-binding/formin homology 3 (GBD/FH3) domain|IPR015425; Formin, FH2 domain	biological_process:GO:0016043//cellular component organization;GO:0030036//actin cytoskeleton organization;molecular_function:GO:0003779//actin binding;GO:0017048//Rho GTPase binding;
590_1	2.26711	NA	42101.3	YGSPDQGPSVR	1	1	1	0.0299	17383	196232	8176.33	XP_021350439.1/3.75436e-125/nuclease EXOG, mitochondrial-like [Mizuhopecten yessoensis] &gt;OWF56352.1 Nuclease EXOG, mitochondrial [Mizuhopecten yessoensis]	Q502K1/4e-119/EXOG_DANRE Nuclease EXOG, mitochondrial OS=Danio rerio OX=7955 GN=exog PE=2 SV=2	myi:110448496/6e-126/nuclease EXOG, mitochondrial-like; K15050 nuclease EXOG, mitochondrial	Hs4826714_1/9e-90/[F] KOG3721 Mitochondrial endonuclease	A0A210R5Q6/7e-125/A0A210R5Q6_MIZYE Nuclease EXOG, mitochondrial OS=Mizuhopecten yessoensis OX=6573 GN=KP79_PYT00067 PE=4 SV=1	PF01223/2.3E-54/DNA/RNA non-specific endonuclease	2|IPR001604; DNA/RNA non-specific endonuclease|IPR020821; Extracellular Endonuclease, subunit A	molecular_function:GO:0003676//nucleic acid binding;GO:0016787//hydrolase activity;GO:0046872//metal ion binding;molecular_function:GO:0046872//metal ion binding;GO:0016787//hydrolase activity;GO:0003676//nucleic acid binding;
570_1	2.53616	NA	45581.5	QIATLLHELK	1	1	1	0.0233	17049	0	0	XP_022310294.1/0/3-ketoacyl-CoA thiolase A, peroxisomal-like [Crassostrea virginica]	P07871/0.0/THIKB_RAT 3-ketoacyl-CoA thiolase B, peroxisomal OS=Rattus norvegicus OX=10116 GN=Acaa1b PE=1 SV=2	myi:110452917/0.0/3-ketoacyl-CoA thiolase B, peroxisomal-like; K07513 acetyl-CoA acyltransferase 1 [EC:2.3.1.16]	Hs4501853/0.0/[I] KOG1389 3-oxoacyl CoA thiolase	A0A210QIP8/0.0/A0A210QIP8_MIZYE 3-ketoacyl-CoA thiolase B, peroxisomal OS=Mizuhopecten yessoensis OX=6573 GN=KP79_PYT19645 PE=3 SV=1	PTHR43853/2.0E-186/--	5|IPR020610; Thiolase, active site|IPR020613; Thiolase, conserved site|IPR020615; Thiolase, acyl-enzyme intermediate active site|IPR020616; Thiolase, N-terminal|IPR020617; Thiolase, C-terminal	biological_process:GO:0008152//metabolic process;molecular_function:GO:0016747//transferase activity, transferring acyl groups other than amino-acyl groups;
480_1	2.96913	NA	61760.9	NVIIEQSWGGPK	1	1	1	0.0208	21701	0	0	AHA85006.1/0/heat shock protein 60 [Pinctada martensii]	Q5ZL72/0.0/CH60_CHICK 60 kDa heat shock protein, mitochondrial OS=Gallus gallus OX=9031 GN=HSPD1 PE=1 SV=1	myi:110463455/0.0/60 kDa heat shock protein, mitochondrial-like; K04077 chaperonin GroEL	7292599/0.0/[O] KOG0356 Mitochondrial chaperonin, Cpn60/Hsp60p	V5NAD0/0.0/V5NAD0_PINIB Heat shock protein 60 OS=Pinctada imbricata OX=66713 PE=2 SV=1	PF00118/1.2E-87/TCP-1/cpn60 chaperonin family	3|IPR001844; Chaperonin Cpn60|IPR002423; Chaperonin Cpn60/TCP-1 family|IPR018370; Chaperonin Cpn60, conserved site	biological_process:GO:0006457//protein folding;GO:0042026//protein refolding;cellular_component:GO:0005737//cytoplasm;molecular_function:GO:0005524//ATP binding;
569_1	5.17327	NA	134787	FYQIVDEINK;LINLHR	1;1	2	2	0.0135	20221;8116	41941.2	625.987	XP_022330242.1/0/uncharacterized protein LOC111128728 [Crassostrea virginica]	Q02858/2e-42/TIE2_MOUSE Angiopoietin-1 receptor OS=Mus musculus OX=10090 GN=Tek PE=1 SV=2	myi:110456916/0.0/uncharacterized protein LOC110456916; K05094 fibroblast growth factor receptor 3 [EC:2.7.10.1]	Hs4557869/3e-41/[T] KOG0200 Fibroblast/platelet-derived growth factor receptor and related receptor tyrosine kinases	A0A210R3U6/0.0/A0A210R3U6_MIZYE Fibroblast growth factor receptor 2 OS=Mizuhopecten yessoensis OX=6573 GN=KP79_PYT08915 PE=4 SV=1	PS50853/11.795/Fibronectin type-III domain profile.	5|IPR000719; Protein kinase domain|IPR000742; EGF-like domain|IPR001245; Serine-threonine/tyrosine-protein kinase, catalytic domain|IPR003961; Fibronectin type III|IPR013032; EGF-like, conserved site	biological_process:GO:0006468//protein phosphorylation;molecular_function:GO:0004672//protein kinase activity;GO:0005515//protein binding;GO:0005524//ATP binding;
682_1	2.02604	NA	15122.8	VGSAIEEYNR	1	1	1	0.0775	16696	218523	24280.4	XP_013420941.1/1.98564e-14/PREDICTED: active regulator of SIRT1-like [Lingula anatina]	Q5ZMG5/1e-10/AROS_CHICK Active regulator of SIRT1 OS=Gallus gallus OX=9031 GN=RPS19BP1 PE=2 SV=1	NA	NA	A0A1S3KFC5/4e-14/A0A1S3KFC5_LINUN active regulator of SIRT1 OS=Lingula unguis OX=7574 GN=LOC106181181 PE=4 SV=1	PR02029/6.8E-6/Active regulator of SIRT1 signature	1|IPR023262; Active regulator of SIRT1	NA
508_1	2.36072	NA	24471.3	ELTTADYIK	1	1	1	0.04	14295	5.99955e+06	545413	XP_011451024.2/2.32177e-118/PREDICTED: acyl-protein thioesterase 2 [Crassostrea gigas]	Q9QYL8/2e-82/LYPA2_RAT Acyl-protein thioesterase 2 OS=Rattus norvegicus OX=10116 GN=Lypla2 PE=1 SV=1	crg:105344824/4e-119/acyl-protein thioesterase 2; K06130 lysophospholipase II [EC:3.1.1.5]	Hs9966764/7e-82/[I] KOG2112 Lysophospholipase	K1QXF9/4e-113/K1QXF9_CRAGI Acyl-protein thioesterase 2 OS=Crassostrea gigas OX=29159 GN=CGI_10019272 PE=4 SV=1	PTHR10655/1.7E-80/--	1|IPR003140; Phospholipase/carboxylesterase/thioesterase	molecular_function:GO:0016787//hydrolase activity;
679_1	2.26711	NA	16667.4	TSLIHDGLAR	1	1	1	0.0658	15131	35572.4	3557.24	ACS72284.1/4.32391e-93/ribosomal protein S12 [Pinctada maxima]	P84175/1e-72/RS12_CHICK 40S ribosomal protein S12 OS=Gallus gallus OX=9031 GN=RPS12 PE=1 SV=2	crg:105348494/2e-85/40S ribosomal protein S12; K02951 small subunit ribosomal protein S12e	Hs14277700/3e-72/[J] KOG3406 40S ribosomal protein S12	C6JUN0/8e-93/C6JUN0_PINMA 40S ribosomal protein S12 OS=Pinctada maxima OX=104660 PE=2 SV=1	PTHR11843/3.1E-68/--	2|IPR000530; Ribosomal protein S12e|IPR004038; Ribosomal protein L7Ae/L30e/S12e/Gadd45	biological_process:GO:0006412//translation;cellular_component:GO:0005622//intracellular;GO:0005840//ribosome;molecular_function:GO:0003735//structural constituent of ribosome;biological_process:GO:0006412//translation;cellular_component:GO:0005840//ribosome;molecular_function:GO:0003735//structural constituent of ribosome;
192_1	2.96913	NA	94621.7	NYVAFQPR	1	1	1	0.0092	12900	179277	3658.71	XP_021342315.1/9.4089e-169/ADP-ribosylation factor GTPase-activating protein 1-like [Mizuhopecten yessoensis] &gt;OWF35526.1 ADP-ribosylation factor GTPase-activating protein 1 [Mizuhopecten yessoensis]	Q8N6T3/6e-105/ARFG1_HUMAN ADP-ribosylation factor GTPase-activating protein 1 OS=Homo sapiens OX=9606 GN=ARFGAP1 PE=1 SV=2	myi:110442828/1e-169/ADP-ribosylation factor GTPase-activating protein 1-like; K12492 ADP-ribosylation factor GTPase-activating protein 1	Hs8922652/2e-105/[TUZ] KOG0704 ADP-ribosylation factor GTPase activator	A0A210PGG0/2e-168/A0A210PGG0_MIZYE ADP-ribosylation factor GTPase-activating protein 1 OS=Mizuhopecten yessoensis OX=6573 GN=KP79_PYT08031 PE=4 SV=1	PR00405/1.2E-22/HIV Rev interacting protein signature	1|IPR001164; Arf GTPase activating protein	molecular_function:GO:0005096//GTPase activator activity;molecular_function:GO:0046872//metal ion binding;GO:0005096//GTPase activator activity;
910_1	2.7719	NA	200888	NQLTGEYSEVPK	1	1	1	0.0066	22719	987964	10081.3	XP_021377219.1/0/aconitate hydratase, mitochondrial-like [Mizuhopecten yessoensis] &gt;OWF38999.1 Aconitate hydratase, mitochondrial [Mizuhopecten yessoensis]	P34455/0.0/ACON_CAEEL Probable aconitate hydratase, mitochondrial OS=Caenorhabditis elegans OX=6239 GN=aco-2 PE=3 SV=2	myi:110465604/0.0/aconitate hydratase, mitochondrial-like; K01681 aconitate hydratase [EC:4.2.1.3]	CE25005/0.0/[CE] KOG0453 Aconitase/homoaconitase (aconitase superfamily)	A0A210PR75/0.0/A0A210PR75_MIZYE Aconitate hydratase, mitochondrial OS=Mizuhopecten yessoensis OX=6573 GN=KP79_PYT05309 PE=3 SV=1	PF00330/2.8E-151/Aconitase family (aconitate hydratase)	3|IPR000573; Aconitase A/isopropylmalate dehydratase small subunit, swivel domain|IPR001030; Aconitase/3-isopropylmalate dehydratase large subunit, alpha/beta/alpha domain|IPR018136; Aconitase family, 4Fe-4S cluster binding site	biological_process:GO:0008152//metabolic process;biological_process:GO:0006099//tricarboxylic acid cycle;cellular_component:GO:0005739//mitochondrion;molecular_function:GO:0003994//aconitate hydratase activity;GO:0046872//metal ion binding;GO:0051539//4 iron, 4 sulfur cluster binding;
553_1	6.70873	NA	30080.8	LFLTTHR;VIFTSDSSK	1;1	2	2	0.0582	10559;12640	650569	59142.6	XP_011429225.1/3.62091e-119/PREDICTED: WW domain-binding protein 2 [Crassostrea gigas] &gt;EKC31714.1 WW domain-binding protein 2 [Crassostrea gigas]	Q969T9/2e-42/WBP2_HUMAN WW domain-binding protein 2 OS=Homo sapiens OX=9606 GN=WBP2 PE=1 SV=1	crg:105329611/6e-120/WW domain-binding protein 2; K22524 WW domain-binding protein 2	CE04043/1e-51/[T] KOG3294 WW domain binding protein WBP-2, contains GRAM domain	K1QKR5/7e-119/K1QKR5_CRAGI WW domain-binding protein 2 OS=Crassostrea gigas OX=29159 GN=CGI_10019166 PE=4 SV=1	PTHR31606/8.5E-77/--	1|IPR004182; GRAM domain	NA
493_1	8.66045	NA	18332.8	TKPLHFWTTADVNK;YGELLSQQEITGR	1;1	2	2	0.1709	27185;25303	455505	41409.6	XP_009048856.1/2.88159e-48/hypothetical protein LOTGIDRAFT_158026 [Lottia gigantea] &gt;ESP00737.1 hypothetical protein LOTGIDRAFT_158026 [Lottia gigantea]	Q0VE29/7e-17/SAM12_MOUSE Sterile alpha motif domain-containing protein 12 OS=Mus musculus OX=10090 GN=Samd12 PE=2 SV=1	NA	NA	V4B2Q0/5e-48/V4B2Q0_LOTGI Uncharacterized protein OS=Lottia gigantea OX=225164 GN=LOTGIDRAFT_158026 PE=4 SV=1	PTHR20843/4.8E-26/--	1|IPR001660; Sterile alpha motif domain	molecular_function:GO:0005515//protein binding;cellular_component:GO:0016021//integral component of membrane;
95_1	2.96913	NA	26631.8	IEFFDFYK;SEIEWIYQR;YDWADEPCTSSYGYICK	0;1;0	1	1	0.1491	15932;18999;30023	1.7217e+06	172170	AND99567.1/7.76436e-86/extrapallial fluid protein EP18 [Pinctada fucata]	P86854/4e-18/PLCL_MYTGA Perlucin-like protein OS=Mytilus galloprovincialis OX=29158 PE=1 SV=1	crg:105322372/3e-18/perlucin-like protein; K17513 C-type lectin superfamily 17 member A	Hs4501991/3e-10/[RW] LSE0104 H Chondroitin sulfate proteoglycan	A0A1C8JY05/1e-85/A0A1C8JY05_PINFU Extrapallial fluid protein EP18 OS=Pinctada fucata OX=50426 PE=2 SV=1	PS00615/-/C-type lectin domain signature.	2|IPR001304; C-type lectin-like|IPR018378; C-type lectin, conserved site	NA
919_1	2.1124	NA	34672.6	HEQKVDIQLQLQQTMDIQLQQQLTMGIQLQNK	1	1	1	0.1164	34067	0	0	XP_013998724.1/1.24207e-21/PREDICTED: uncharacterized protein LOC106570759 [Salmo salar]	Q8ILR9/7e-06/YPF17_PLAF7 Protein PF14_0175 OS=Plasmodium falciparum (isolate 3D7) OX=36329 GN=PF14_0175 PE=1 SV=1	fab:101821184/5e-19/acrosin-like; K01317 acrosin [EC:3.4.21.10]	NA	A0A1S3M6Y1/2e-21/A0A1S3M6Y1_SALSA uncharacterized protein LOC106570759 OS=Salmo salar OX=8030 GN=LOC106570759 PE=4 SV=1	NA	NA	cellular_component:GO:0016021//integral component of membrane;
462_1	2.01908	NA	28524.5	TILLNNNR	1	1	1	0.0317	12110	199557	12472.3	XP_022313236.1/2.86681e-145/U2 small nuclear ribonucleoprotein A&apos;-like [Crassostrea virginica]	P57784/3e-114/RU2A_MOUSE U2 small nuclear ribonucleoprotein A' OS=Mus musculus OX=10090 GN=Snrpa1 PE=1 SV=2	crg:105324065/6e-145/U2 small nuclear ribonucleoprotein A'; K11092 U2 small nuclear ribonucleoprotein A'	Hs4507121/5e-114/[A] KOG1644 U2-associated snRNP A' protein	A0A210QBR6/3e-132/A0A210QBR6_MIZYE U2 small nuclear ribonucleoprotein A OS=Mizuhopecten yessoensis OX=6573 GN=KP79_PYT08158 PE=4 SV=1	PS51450/6.811/Leucine-rich repeat profile.	2|IPR001611; Leucine-rich repeat|IPR003603; U2A'/phosphoprotein 32 family A, C-terminal	molecular_function:GO:0005515//protein binding;cellular_component:GO:0030529//intracellular ribonucleoprotein complex;GO:0019013//viral nucleocapsid;
776_1	2.05305	NA	119654	KNNTEQTSTER	1	1	1	0.0104	21241	0	0	XP_013072432.1/3.56998e-32/PREDICTED: ankyrin-3-like isoform X8 [Biomphalaria glabrata]	O70511/6e-28/ANK3_RAT Ankyrin-3 OS=Rattus norvegicus OX=10116 GN=Ank3 PE=1 SV=3	sasa:106577144/3e-30/ankyrin-3-like; K10380 ankyrin	7295202/8e-29/[M] KOG4177 Ankyrin	A0A2C9K8X4/7e-32/A0A2C9K8X4_BIOGL Uncharacterized protein OS=Biomphalaria glabrata OX=6526 GN=106059375 PE=4 SV=1	PS50088/11.781/Ankyrin repeat profile.	2|IPR002110; Ankyrin repeat|IPR020683; Ankyrin repeat-containing domain	molecular_function:GO:0005515//protein binding;
755_1	2.96913	NA	37967.2	DLNDIGDVEK	1	1	1	0.03	16166	520884	24804	XP_011429567.1/2.74105e-170/PREDICTED: inorganic pyrophosphatase isoform X2 [Crassostrea gigas]	Q6BWA5/2e-125/IPYR_DEBHA Inorganic pyrophosphatase OS=Debaryomyces hansenii (strain ATCC 36239 / CBS 767 / JCM 1990 / NBRC 0083 / IGC 2968) OX=284592 GN=IPP1 PE=3 SV=1	crg:105329817/2e-170/inorganic pyrophosphatase isoform X1; K11726 nucleosome-remodeling factor 38 kDa subunit [EC:3.6.1.1]	7291807/6e-121/[C] KOG1626 Inorganic pyrophosphatase/Nucleosome remodeling factor, subunit NURF38	A0A1S3HKP3/3e-144/A0A1S3HKP3_LINUN inorganic pyrophosphatase OS=Lingula unguis OX=7574 GN=LOC106155654 PE=4 SV=1	PTHR10286:SF3/6.2E-141/--	1|IPR008162; Inorganic pyrophosphatase	biological_process:GO:0006796//phosphate-containing compound metabolic process;cellular_component:GO:0005737//cytoplasm;molecular_function:GO:0000287//magnesium ion binding;GO:0004427//inorganic diphosphatase activity;
274_1	2.16251	NA	168223	AHYDLR	1	1	1	0.004	8260	0	0	ATA66765.1/0/Pol [Haliotis discus hannai]	P10394/1e-128/POL4_DROME Retrovirus-related Pol polyprotein from transposon 412 OS=Drosophila melanogaster OX=7227 GN=POL PE=4 SV=1	xma:102225078/0.0/uncharacterized protein LOC102225078; K06065 nuclear receptor co-repressor 2	At2g10780/2e-125/[R] KOG0017 FOG: Transposon-encoded proteins with TYA, reverse transcriptase, integrase domains in various combinations	A0A289ZXJ9/0.0/A0A289ZXJ9_HALDH Pol OS=Haliotis discus hannai OX=42344 PE=4 SV=1	PF00078/5.6E-27/Reverse transcriptase (RNA-dependent DNA polymerase)	2|IPR000477; Reverse transcriptase domain|IPR001584; Integrase, catalytic core	biological_process:GO:0015074//DNA integration;
147_1	2.43211	NA	27948.9	DILLLGHR	1	1	1	0.0336	11637	19721	1160.06	XP_019927046.1/8.51725e-126/PREDICTED: cytoplasmic phosphatidylinositol transfer protein 1-like [Crassostrea gigas]	Q8K4R4/4e-99/PITC1_MOUSE Cytoplasmic phosphatidylinositol transfer protein 1 OS=Mus musculus OX=10090 GN=Pitpnc1 PE=1 SV=1	egl:EGR_00902/4e-39/Calpain-7; K08576 calpain-7 [EC:3.4.22.-]	Hs6912624/9e-97/[IT] KOG3668 Phosphatidylinositol transfer protein	R7TV16/2e-110/R7TV16_CAPTE Uncharacterized protein OS=Capitella teleta OX=283909 GN=CAPTEDRAFT_171798 PE=4 SV=1	PTHR10658:SF55/3.1E-99/--	1|IPR001666; Phosphatidylinositol transfer protein	biological_process:GO:0015914//phospholipid transport;cellular_component:GO:0005622//intracellular;molecular_function:GO:0005548//phospholipid transporter activity;biological_process:GO:0006810//transport;cellular_component:GO:0005622//intracellular;
819_1	3.03078	NA	58312.5	VDILDPALLR	1	1	1	0.0193	16364	0	0	XP_011452372.1/0/PREDICTED: 26S protease regulatory subunit 6A-B [Crassostrea gigas] &gt;EKC24037.1 26S protease regulatory subunit 6A [Crassostrea gigas]	O88685/0.0/PRS6A_MOUSE 26S proteasome regulatory subunit 6A OS=Mus musculus OX=10090 GN=Psmc3 PE=1 SV=2	crg:105345779/0.0/26S protease regulatory subunit 6A-B; K03065 26S proteasome regulatory subunit T5	Hs21361144/0.0/[O] KOG0652 26S proteasome regulatory complex, ATPase RPT5	K1PJ85/0.0/K1PJ85_CRAGI 26S protease regulatory subunit 6A OS=Crassostrea gigas OX=29159 GN=CGI_10026274 PE=3 SV=1	PTHR23073:SF7/3.8E-218/--	4|IPR003593; AAA+ ATPase domain|IPR003959; ATPase, AAA-type, core|IPR003960; ATPase, AAA-type, conserved site|IPR035254; 26S Proteasome regulatory subunit 6A	molecular_function:GO:0005524//ATP binding;GO:0036402//proteasome-activating ATPase activity;biological_process:GO:0030163//protein catabolic process;cellular_component:GO:0005737//cytoplasm;molecular_function:GO:0008233//peptidase activity;GO:0005524//ATP binding;GO:0036402//proteasome-activating ATPase activity;
756_1	2.0443	NA	22249	HYEDICVR	1	1	1	0.0415	15423	91087.5	10120.8	XP_022314620.1/9.27328e-103/ADP-ribosylation factor-like protein 6-interacting protein 1 [Crassostrea virginica]	Q9JKW0/4e-41/AR6P1_MOUSE ADP-ribosylation factor-like protein 6-interacting protein 1 OS=Mus musculus OX=10090 GN=Arl6ip1 PE=1 SV=1	NA	NA	A0A210QCN8/2e-94/A0A210QCN8_MIZYE ADP-ribosylation factor-like protein 6-interacting protein 1 OS=Mizuhopecten yessoensis OX=6573 GN=KP79_PYT05218 PE=4 SV=1	PTHR20952/1.1E-47/--	NA	cellular_component:GO:0016021//integral component of membrane;
596_1	4.33022	NA	24127.7	DLPLNSLSASSPVVLVR	1	1	1	0.0813	27959	0	0	ELT89193.1/9.18649e-63/hypothetical protein CAPTEDRAFT_202693 [Capitella teleta]	A2BD92/7e-54/TM11A_XENLA Transmembrane protein 11-A, mitochondrial OS=Xenopus laevis OX=8355 GN=tmem11-a PE=2 SV=1	NA	NA	R7T714/2e-62/R7T714_CAPTE Uncharacterized protein OS=Capitella teleta OX=283909 GN=CAPTEDRAFT_202693 PE=4 SV=1	PF14972/7.9E-67/Mitochondrial morphogenesis regulator	1|IPR026120; Transmembrane protein 11	biological_process:GO:0007005//mitochondrion organization;cellular_component:GO:0031305//integral component of mitochondrial inner membrane;
113_1	2.96913	NA	60452.1	LQIYYEQVK	1	1	1	0.0164	17958	80044.8	3335.2	XP_022317569.1/5.61004e-167/WW domain-binding protein 11-like isoform X1 [Crassostrea virginica]	Q923D5/9e-42/WBP11_MOUSE WW domain-binding protein 11 OS=Mus musculus OX=10090 GN=Wbp11 PE=1 SV=2	crg:105340745/3e-108/WW domain-binding protein 11; K12866 WW domain-binding protein 11	Hs7706501/8e-42/[S] KOG4672 Uncharacterized conserved low complexity protein	A0A2T7Q158/3e-73/A0A2T7Q158_POMCA Uncharacterized protein OS=Pomacea canaliculata OX=400727 GN=C0Q70_02007 PE=4 SV=1	PTHR13361/5.4E-75/--	1|IPR019007; WW domain binding protein 11	biological_process:GO:0006396//RNA processing;
52_3	2.96913	NA	41757.8	AGFAGDDAPR;DLYANTVLSGGTTMFPGIADR;DSYVGDEAQSK;EITALAPQTMK;GYSFTTTAER;HQGVMVGMGQK;IIAPPER;IWHHTFYNELR;KDLYANTVLSGGTTMFPGIADR;QEYDESGPSIVHR;SYELPDGQVITIGNER;VAPEEHPVLLTEAPLNPK	0;0;0;1;0;0;0;0;0;0;0;0	1	1	0.3723	12514;12515;12513;30473;30468;30467;30553;30547;18345;18891;16590;16591;18046;18073;17652;17651;17629;18045;17631;8616;8615;25672;25679;25680;25678;25677;25675;25703;25681;25682;25702;25673;31068;25424;25698;25423;25697;25720;25719;28142;28141;28143;28144;29112;29113	0	0	AOR07102.1/0/actin [Mesenchytraeus antaeus]	P10984/0.0/ACT2_CAEEL Actin-2 OS=Caenorhabditis elegans OX=6239 GN=act-2 PE=3 SV=3	spis:111334041/0.0/actin, cytoplasmic isoform X1; K05692 actin beta/gamma 1	CE13150/0.0/[Z] KOG0676 Actin and related proteins	A0A286Q506/0.0/A0A286Q506_9ANNE Actin OS=Mesenchytraeus antaeus OX=1797136 PE=2 SV=1	PR00190/4.7E-58/Actin signature	3|IPR004000; Actin family|IPR004001; Actin, conserved site|IPR020902; Actin/actin-like conserved site	NA
915_1	2.7719	NA	51682.3	EFLLIFR	1	1	1	0.0156	11653	0	0	XP_005100525.1/6.53301e-95/PREDICTED: EF-hand domain-containing protein D2-like [Aplysia californica]	Q4FZY0/7e-70/EFHD2_RAT EF-hand domain-containing protein D2 OS=Rattus norvegicus OX=10116 GN=Efhd2 PE=1 SV=1	els:105015245/1e-08/aif1l; allograft inflammatory factor 1-like; K18617 allograft inflammatory factor 1	Hs13899241/4e-09/[T] KOG0027 Calmodulin and related proteins (EF-Hand superfamily)	A0A2T7PT67/3e-94/A0A2T7PT67_POMCA Uncharacterized protein OS=Pomacea canaliculata OX=400727 GN=C0Q70_03608 PE=4 SV=1	SM00054/0.011/--	2|IPR002048; EF-hand domain|IPR018247; EF-Hand 1, calcium-binding site	molecular_function:GO:0005509//calcium ion binding;molecular_function:GO:0005509//calcium ion binding;
182_1	2.96913	NA	58178.6	GAMFLCILGLFALGLPSAMDLDILTNQDFVWGFALVINGMMLQYMVIRYGTR	1	1	1	0.1	34464	0	0	EKC20246.1/0/Sodium- and chloride-dependent GABA transporter ine [Crassostrea gigas]	Q9VR07/2e-36/INE_DROME Sodium- and chloride-dependent GABA transporter ine OS=Drosophila melanogaster OX=7227 GN=ine PE=1 SV=1	dme:Dmel_CG15444/4e-35/ine; inebriated, isoform F; K05039 solute carrier family 6 (neurotransmitter transporter, taurine) member 6	7295696/1e-36/[T] KOG3660 Sodium-neurotransmitter symporter	K1QFC1/0.0/K1QFC1_CRAGI Sodium-and chloride-dependent GABA transporter ine OS=Crassostrea gigas OX=29159 GN=CGI_10006472 PE=4 SV=1	PF00209/1.1E-18/Sodium:neurotransmitter symporter family	1|IPR000175; Sodium:neurotransmitter symporter	biological_process:GO:0006836//neurotransmitter transport;cellular_component:GO:0016021//integral component of membrane;molecular_function:GO:0005328//neurotransmitter:sodium symporter activity;cellular_component:GO:0016021//integral component of membrane;molecular_function:GO:0005328//neurotransmitter:sodium symporter activity;
612_1	2.96913	NA	27970.1	YNYGSPIPLK	1	1	1	0.0392	17104	82545.8	5503.05	XP_022333211.1/1.52481e-167/proteasome subunit alpha type-3-like [Crassostrea virginica]	Q58DU5/5e-144/PSA3_BOVIN Proteasome subunit alpha type-3 OS=Bos taurus OX=9913 GN=PSMA3 PE=1 SV=3	crg:105341348/9e-168/proteasome subunit alpha type-3; K02727 20S proteasome subunit alpha 7 [EC:3.4.25.1]	Hs4506183/5e-144/[O] KOG0184 20S proteasome, regulatory subunit alpha type PSMA3/PRE10	A0A194AM89/0.0/A0A194AM89_PINFU Proteasome subunit alpha type OS=Pinctada fucata OX=50426 PE=3 SV=1	SM00948/7.7E-9/--	4|IPR000426; Proteasome alpha-subunit, N-terminal domain|IPR001353; Proteasome, subunit alpha/beta|IPR023332; Proteasome alpha-type subunit|IPR037555; Proteasome subunit alpha 3	biological_process:GO:0006511//ubiquitin-dependent protein catabolic process;GO:0051603//proteolysis involved in cellular protein catabolic process;cellular_component:GO:0005839//proteasome core complex;GO:0019773//proteasome core complex, alpha-subunit complex;molecular_function:GO:0004175//endopeptidase activity;GO:0004298//threonine-type endopeptidase activity;biological_process:GO:0006511//ub…
3_1	4.33022	NA	51597.5	AFVHWYVGEGMEEGEFSEAR;AVCMLSNTTAIAEAWAR;DVNAAIATIK;EDAANNYAR;EIVDLVLDR;FDLMYAK;QLFHPEQLITGK;TIQFVDWCPTGFK;VGINYQPPTVVPGGDLAK	0;0;0;0;0;0;1;0;0	1	2	0.2473	31072;31125;28704;13407;13582;14855;10548;23742;23743;26668;28346	144364	6276.68	NP_001292302.1/0/tubulin alpha chain, testis-specific [Crassostrea gigas] &gt;BAD80736.1 alpha-tubulin [Crassostrea gigas]	P18288/0.0/TBAT_ONCMY Tubulin alpha chain, testis-specific OS=Oncorhynchus mykiss OX=8022 PE=2 SV=1	crg:105329640/0.0/tubulin alpha chain, testis-specific; K07374 tubulin alpha	Hs17921993/0.0/[Z] KOG1376 Alpha tubulin	Q5NT89/0.0/Q5NT89_CRAGI Tubulin alpha chain OS=Crassostrea gigas OX=29159 PE=2 SV=1	PR01162/7.4E-121/Alpha-tubulin signature	5|IPR000217; Tubulin|IPR002452; Alpha tubulin|IPR003008; Tubulin/FtsZ, GTPase domain|IPR017975; Tubulin, conserved site|IPR018316; Tubulin/FtsZ, 2-layer sandwich domain	biological_process:GO:0007017//microtubule-based process;cellular_component:GO:0005874//microtubule;molecular_function:GO:0003924//GTPase activity;GO:0005200//structural constituent of cytoskeleton;GO:0005525//GTP binding;biological_process:GO:0007017//microtubule-based process;cellular_component:GO:0005874//microtubule;GO:0005737//cytoplasm;molecular_function:GO:0005200//structural constituent o…
137_2	11.6296	NA	50589.4	EHALLAYTLGVK;IGGIGTVPVGR;LPLQDVYK;MDSTEPPYSEAR;QMIVGVNK;QTVAVGVIK;VETGILKPGTVVTFAPVNVTTEVK;YYITIIDAPGHR	0;0;0;1;1;0;1;0	3	4	0.2082	21399;21398;13661;12500;23106;10600;10925;11164;31644;23901;23900	552940	21266.9	XP_002604722.1/0/hypothetical protein BRAFLDRAFT_122567 [Branchiostoma floridae] &gt;EEN60732.1 hypothetical protein BRAFLDRAFT_122567 [Branchiostoma floridae]	Q92005/0.0/EF1A_DANRE Elongation factor 1-alpha OS=Danio rerio OX=7955 GN=eef1a PE=2 SV=1	amex:103044018/0.0/elongation factor 1-alpha; K03231 elongation factor 1-alpha	7303554/0.0/[J] KOG0052 Translation elongation factor EF-1 alpha/Tu	A0A194ALQ1/0.0/A0A194ALQ1_PINFU Elongation factor 1-alpha OS=Pinctada fucata OX=50426 PE=3 SV=1	PTHR23115:SF227/2.6E-289/--	4|IPR000795; Transcription factor, GTP-binding domain|IPR004160; Translation elongation factor EFTu/EF1A, C-terminal|IPR004161; Translation elongation factor EFTu-like, domain 2|IPR031157; Tr-type G domain, conserved site	molecular_function:GO:0003924//GTPase activity;GO:0005525//GTP binding;cellular_component:GO:0005622//intracellular;GO:0005737//cytoplasm;molecular_function:GO:0003746//translation elongation factor activity;GO:0005525//GTP binding;GO:0003924//GTPase activity;
96_1	2.96913	NA	14543.6	FADENFSLK;VIPGFMCQGGDFTR	1;0	1	1	0.1729	14806;26684;26555	1.20214e+06	109286	XP_015780894.1/2.35036e-58/PREDICTED: peptidyl-prolyl cis-trans isomerase 1-like [Acropora digitifera]	P91791/2e-55/PPIA_HEMPU Peptidyl-prolyl cis-trans isomerase OS=Hemicentrotus pulcherrimus OX=7650 PE=2 SV=1	epa:110250522/3e-56/peptidyl-prolyl cis-trans isomerase-like; K09565 peptidyl-prolyl isomerase F (cyclophilin D) [EC:5.2.1.8]	7294404/3e-51/[O] KOG0865 Cyclophilin type peptidyl-prolyl cis-trans isomerase	A0A3M6TC95/2e-57/A0A3M6TC95_9CNID Peptidyl-prolyl cis-trans isomerase OS=Pocillopora damicornis OX=46731 GN=pdam_00008182 PE=3 SV=1	PS00170/-/Cyclophilin-type peptidyl-prolyl cis-trans isomerase signature.	3|IPR002130; Cyclophilin-type peptidyl-prolyl cis-trans isomerase domain|IPR020892; Cyclophilin-type peptidyl-prolyl cis-trans isomerase, conserved site|IPR024936; Cyclophilin-type peptidyl-prolyl cis-trans isomerase	biological_process:GO:0000413//protein peptidyl-prolyl isomerization;GO:0006457//protein folding;molecular_function:GO:0003755//peptidyl-prolyl cis-trans isomerase activity;
699_1	2.7719	NA	82326.2	LVIIANNTPPLR	1	1	1	0.0155	21557	179715	5797.27	XP_011416874.1/0/PREDICTED: mitochondrial sodium/hydrogen exchanger 9B2 [Crassostrea gigas] &gt;XP_019919775.1 PREDICTED: mitochondrial sodium/hydrogen exchanger 9B2 [Crassostrea gigas] &gt;EKC33360.1 Mitochondrial sodium/hydrogen exchanger NHA2 [Crassostrea gigas]	Q5BKR2/2e-108/SL9B2_MOUSE Sodium/hydrogen exchanger 9B2 OS=Mus musculus OX=10090 GN=Slc9b2 PE=1 SV=2	tca:659206/1e-49/60S ribosomal protein L30; K02908 large subunit ribosomal protein L30e	7297183/2e-87/[P] KOG3826 Na+/H+ antiporter	K1QWL3/0.0/K1QWL3_CRAGI Mitochondrial sodium/hydrogen exchanger NHA2 OS=Crassostrea gigas OX=29159 GN=CGI_10025881 PE=4 SV=1	PS00709/-/Ribosomal protein L30e signature 1.	3|IPR004038; Ribosomal protein L7Ae/L30e/S12e/Gadd45|IPR006153; Cation/H+ exchanger|IPR022991; Ribosomal protein L30e, conserved site	biological_process:GO:0006812//cation transport;GO:0055085//transmembrane transport;cellular_component:GO:0016021//integral component of membrane;molecular_function:GO:0015299//solute:proton antiporter activity;cellular_component:GO:0016021//integral component of membrane;molecular_function:GO:0015299//solute:proton antiporter activity;
7_1	5.44124	NA	30070.5	ATEDTIVADK;IPIEVVK	1;1	2	2	0.062	14566;8657	1.04327e+06	86938.8	XP_011422410.1/6.92725e-167/PREDICTED: proteasome subunit beta type-7 [Crassostrea gigas] &gt;EKC28337.1 Proteasome subunit beta type-7 [Crassostrea gigas]	P70195/7e-137/PSB7_MOUSE Proteasome subunit beta type-7 OS=Mus musculus OX=10090 GN=Psmb7 PE=1 SV=1	crg:105324879/1e-167/proteasome subunit beta type-7; K02739 20S proteasome subunit beta 2 [EC:3.4.25.1]	Hs4506203/1e-134/[O] KOG0173 20S proteasome, regulatory subunit beta type PSMB7/PSMB10/PUP1	K1PVF6/1e-166/K1PVF6_CRAGI Proteasome subunit beta OS=Crassostrea gigas OX=29159 GN=CGI_10011558 PE=3 SV=1	PTHR11599:SF42/5.9E-129/--	6|IPR000243; Peptidase T1A, proteasome beta-subunit|IPR001353; Proteasome, subunit alpha/beta|IPR016050; Proteasome beta-type subunit, conserved site|IPR023333; Proteasome B-type subunit|IPR024689; Proteasome beta subunit, C-terminal|IPR035216; Proteasome subunit beta 7	biological_process:GO:0051603//proteolysis involved in cellular protein catabolic process;cellular_component:GO:0005839//proteasome core complex;molecular_function:GO:0004175//endopeptidase activity;GO:0004298//threonine-type endopeptidase activity;biological_process:GO:0051603//proteolysis involved in cellular protein catabolic process;cellular_component:GO:0005634//nucleus;GO:0005737//cytoplasm…
814_1	4.33022	NA	46651.3	FGVNTTSDNK	1	1	1	0.0232	15120	5.03232e+06	201293	XP_022330283.1/2.18744e-127/pyrroline-5-carboxylate reductase 2-like [Crassostrea virginica]	Q58DT4/2e-81/P5CR1_BOVIN Pyrroline-5-carboxylate reductase 1, mitochondrial OS=Bos taurus OX=9913 GN=PYCR1 PE=2 SV=1	crg:105345505/1e-127/pyrroline-5-carboxylate reductase 2; K00286 pyrroline-5-carboxylate reductase [EC:1.5.1.2]	CE03511/2e-80/[E] KOG3124 Pyrroline-5-carboxylate reductase	K1QJ39/1e-126/K1QJ39_CRAGI Pyrroline-5-carboxylate reductase OS=Crassostrea gigas OX=29159 GN=CGI_10003622 PE=3 SV=1	PTHR11645:SF46/2.0E-107/--	2|IPR028939; Pyrroline-5-carboxylate reductase, catalytic, N-terminal|IPR029036; Pyrroline-5-carboxylate reductase, dimerisation domain	biological_process:GO:0006561//proline biosynthetic process;GO:0055129//L-proline biosynthetic process;molecular_function:GO:0004735//pyrroline-5-carboxylate reductase activity;
41_1	6.76234	NA	53161.2	NNYIQILTDMGEK;NSPEDYQGGR	1;1	2	2	0.0475	26044;16302	18368.3	656.011	XP_022310623.1/0/protein disulfide-isomerase A6-like [Crassostrea virginica]	Q63081/0.0/PDIA6_RAT Protein disulfide-isomerase A6 OS=Rattus norvegicus OX=10116 GN=Pdia6 PE=1 SV=2	crg:105341388/0.0/protein disulfide-isomerase A6; K09584 protein disulfide-isomerase A6 [EC:5.3.4.1]	Hs5031973/0.0/[O] KOG0191 Thioredoxin/protein disulfide isomerase	K1PDF0/0.0/K1PDF0_CRAGI Protein disulfide-isomerase A6 OS=Crassostrea gigas OX=29159 GN=CGI_10008332 PE=3 SV=1	PS51352/15.202/Thioredoxin domain profile.	2|IPR013766; Thioredoxin domain|IPR017937; Thioredoxin, conserved site	biological_process:GO:0045454//cell redox homeostasis;biological_process:GO:0045454//cell redox homeostasis;cellular_component:GO:0005623//cell;molecular_function:GO:0016853//isomerase activity;
848_1	2.26711	NA	46267.3	HTTGSPLGGHAIK	1	1	1	0.0311	20405	0	0	ADX32985.1/4.4497e-177/cathepsin B [Pinctada fucata]	A1E295/6e-110/CATB_PIG Cathepsin B OS=Sus scrofa OX=9823 GN=CTSB PE=1 SV=1	crg:105328916/1e-153/cathepsin B; K01363 cathepsin B [EC:3.4.22.1]	7292926/3e-108/[O] KOG1543 Cysteine proteinase Cathepsin L	F1DH40/8e-177/F1DH40_PINFU Cathepsin B OS=Pinctada fucata OX=50426 PE=2 SV=1	PTHR12411:SF540/9.1E-96/--	5|IPR000169; Cysteine peptidase, cysteine active site|IPR000668; Peptidase C1A, papain C-terminal|IPR012599; Peptidase C1A, propeptide|IPR013128; Peptidase C1A|IPR025660; Cysteine peptidase, histidine active site	biological_process:GO:0006508//proteolysis;GO:0050790//regulation of catalytic activity;molecular_function:GO:0004197//cysteine-type endopeptidase activity;GO:0008234//cysteine-type peptidase activity;biological_process:GO:0050790//regulation of catalytic activity;molecular_function:GO:0004197//cysteine-type endopeptidase activity;
784_1	3.28883	NA	27699	SIFATPEHVHGR	1	1	1	0.0492	22377	154562	11040.2	XP_019930527.1/1.55582e-119/PREDICTED: survival of motor neuron-related-splicing factor 30 [Crassostrea gigas]	Q7ZV80/3e-76/SPF30_DANRE Survival of motor neuron-related-splicing factor 30 OS=Danio rerio OX=7955 GN=smndc1 PE=2 SV=1	crg:105347375/2e-120/survival of motor neuron-related-splicing factor 30; K12839 survival of motor neuron-related-splicing factor 30	Hs5032113/3e-68/[A] KOG3026 Splicing factor SPF30	A0A210QZS8/2e-108/A0A210QZS8_MIZYE Survival of motor neuron-related-splicing factor 30 OS=Mizuhopecten yessoensis OX=6573 GN=KP79_PYT23782 PE=4 SV=1	PTHR13681/2.5E-80/--	2|IPR002999; Tudor domain|IPR010304; Survival motor neuron	biological_process:GO:0006397//mRNA processing;cellular_component:GO:0005634//nucleus;GO:0005737//cytoplasm;molecular_function:GO:0003723//RNA binding;biological_process:GO:0006397//mRNA processing;cellular_component:GO:0005634//nucleus;GO:0005737//cytoplasm;molecular_function:GO:0003723//RNA binding;
449_1	2.59745	NA	123904	YADIVITK	1	1	1	0.0076	11337	32361	588.382	EKC17192.1/0/Aspartyl/asparaginyl beta-hydroxylase [Crassostrea gigas]	Q8BSY0/4e-151/ASPH_MOUSE Aspartyl/asparaginyl beta-hydroxylase OS=Mus musculus OX=10090 GN=Asph PE=1 SV=1	myi:110454515/0.0/aspartyl/asparaginyl beta-hydroxylase-like; K00476 aspartate beta-hydroxylase [EC:1.14.11.16]	Hs14589866/4e-151/[O] KOG3696 Aspartyl beta-hydroxylase	K1P0H0/0.0/K1P0H0_CRAGI Aspartyl/asparaginyl beta-hydroxylase OS=Crassostrea gigas OX=29159 GN=CGI_10001813 PE=4 SV=1	PS50293/6.566/TPR repeat region circular profile.	4|IPR007803; Aspartyl/asparaginy/proline hydroxylase|IPR013026; Tetratricopeptide repeat-containing domain|IPR019734; Tetratricopeptide repeat|IPR039038; Aspartyl/asparaginyl beta-hydroxylase family	biological_process:GO:0018193//peptidyl-amino acid modification;GO:0042264//peptidyl-aspartic acid hydroxylation;molecular_function:GO:0004597//peptide-aspartate beta-dioxygenase activity;GO:0005515//protein binding;
932_1	7.29935	NA	283589	LIEDSDINTADIK;TSLLELWEER	1;1	2	2	0.0094	24457;20404	62396.2	344.73	EKC38224.1/0/Spectrin alpha chain [Crassostrea gigas]	P13395/0.0/SPTCA_DROME Spectrin alpha chain OS=Drosophila melanogaster OX=7227 GN=alpha-Spec PE=1 SV=2	crg:105340209/0.0/spectrin alpha chain; K06114 spectrin alpha	7292157/0.0/[Z] KOG0040 Ca2+-binding actin-bundling protein (spectrin), alpha chain (EF-Hand protein superfamily)	K1R401/0.0/K1R401_CRAGI Spectrin alpha chain OS=Crassostrea gigas OX=29159 GN=CGI_10025721 PE=4 SV=1	PS00018/-/EF-hand calcium-binding domain.	6|IPR001452; SH3 domain|IPR002017; Spectrin repeat|IPR002048; EF-hand domain|IPR014837; EF-hand, Ca insensitive|IPR018159; Spectrin/alpha-actinin|IPR018247; EF-Hand 1, calcium-binding site	molecular_function:GO:0005509//calcium ion binding;GO:0005515//protein binding;
241_1	2.1124	NA	50994.7	GQVPTFVDK	1	1	1	0.0199	12793	298854	9640.44	XP_022340585.1/3.25437e-78/LOW QUALITY PROTEIN: glutathione S-transferase A-like [Crassostrea virginica]	P30568/7e-59/GSTA_PLEPL Glutathione S-transferase A OS=Pleuronectes platessa OX=8262 PE=2 SV=1	crg:105323777/1e-73/glutathione S-transferase A; K00799 glutathione S-transferase [EC:2.5.1.18]	7303938/3e-14/[O] KOG0867 Glutathione S-transferase	A0A194ALK6/7e-73/A0A194ALK6_PINFU Uncharacterized protein (Fragment) OS=Pinctada fucata OX=50426 PE=4 SV=1	PS50404/19.776/Soluble glutathione S-transferase N-terminal domain profile.	3|IPR004045; Glutathione S-transferase, N-terminal|IPR004046; Glutathione S-transferase, C-terminal|IPR010987; Glutathione S-transferase, C-terminal-like	molecular_function:GO:0005515//protein binding;
99_1	4.33022	NA	16252.8	GYGEEFDISK	1	1	1	0.0725	16912	31910.4	4558.63	XP_022311818.1/1.27106e-64/protein archease-like [Crassostrea virginica]	Q566V0/4e-45/ARCH_DANRE Protein archease OS=Danio rerio OX=7955 GN=zbtb8os PE=2 SV=2	nai:NECAME_05198/4e-21/DEAD/DEAH box helicase; K13179 ATP-dependent RNA helicase DDX18/HAS1 [EC:3.6.4.13]	Hs22045229/1e-44/[S] KOG4528 Uncharacterized conserved protein	R7TUI1/6e-60/R7TUI1_CAPTE Uncharacterized protein OS=Capitella teleta OX=283909 GN=CAPTEDRAFT_199964 PE=4 SV=1	PD012969/6.0E-43/UPF0211 RIKEN CDNA ENRICHED MALE FULL-LENGTH LIBRARY ZBTB8OS ADULT C43H8.1	2|IPR002804; Archease|IPR023572; Archease domain	NA
821_1	4.33022	NA	38571.2	CDYCNVDYTSESQEYQHLSGSK	1	1	1	0.0634	32241	0	0	XP_022313689.1/1.19095e-34/zinc finger protein 385B-like [Crassostrea virginica]	Q8AVN9/2e-07/ZN346_XENLA Zinc finger protein 346 OS=Xenopus laevis OX=8355 GN=znf346 PE=1 SV=1	cmk:103188132/3e-07/zfr2; zinc finger RNA binding protein 2; K13203 zinc finger RNA-binding protein	NA	K1R9W6/6e-28/K1R9W6_CRAGI Uncharacterized protein OS=Crassostrea gigas OX=29159 GN=CGI_10021333 PE=4 SV=1	SM00451/0.27/--	3|IPR003604; Matrin/U1-C-like, C2H2-type zinc finger|IPR013087; Zinc finger C2H2-type|IPR022755; Zinc finger, double-stranded RNA binding	molecular_function:GO:0003676//nucleic acid binding;GO:0008270//zinc ion binding;
738_1	4.33022	NA	103893	VAQAEFDR	1	1	1	0.0083	11599	174249	3707.42	EKC33267.1/3.14469e-158/Endophilin-B1 [Crassostrea gigas]	Q5ZIR1/5e-104/SHLB1_CHICK Endophilin-B1 OS=Gallus gallus OX=9031 GN=SH3GLB1 PE=2 SV=1	crg:105317978/9e-155/endophilin-B1 isoform X1; K11248 endophilin-B1	Hs7705773/3e-102/[T] KOG3725 SH3 domain protein SH3GLB	K1Q963/6e-158/K1Q963_CRAGI Endophilin-B1 OS=Crassostrea gigas OX=29159 GN=CGI_10012647 PE=4 SV=1	PTHR44071/5.3E-265/--	3|IPR001452; SH3 domain|IPR004148; BAR domain|IPR028503; Endophilin-B1	cellular_component:GO:0005737//cytoplasm;molecular_function:GO:0005515//protein binding;
170_1	2.14231	NA	147767	EEVITASECR	1	1	1	0.0077	18193	44059.9	557.721	XP_011440924.1/0/PREDICTED: Golgi apparatus protein 1 isoform X1 [Crassostrea gigas]	Q9Z1E9/0.0/GSLG1_CRIGR Golgi apparatus protein 1 OS=Cricetulus griseus OX=10029 GN=GLG1 PE=1 SV=1	crg:105337751/0.0/Golgi apparatus protein 1 isoform X1; K06816 golgi apparatus protein 1	Hs20561811/0.0/[U] KOG3648 Golgi apparatus protein (cysteine-rich fibroblast growth factor receptor)	K1RDW8/0.0/K1RDW8_CRAGI Golgi apparatus protein 1 OS=Crassostrea gigas OX=29159 GN=CGI_10022239 PE=4 SV=1	PS51289/14.441/Cysteine-rich GLG1 repeat profile.	2|IPR001893; Cysteine-rich Golgi apparatus protein 1 repeat|IPR017873; Cysteine-rich Golgi apparatus protein 1 repeat, eukaryote	cellular_component:GO:0000139//Golgi membrane;GO:0016020//membrane;cellular_component:GO:0016021//integral component of membrane;GO:0000139//Golgi membrane;
297_1	2.36072	NA	97813.4	TVIQLDK	1	1	1	0.0079	9022	678269	15773.7	XP_011441774.1/0/PREDICTED: metastasis suppressor protein 1 isoform X4 [Crassostrea gigas]	O43312/4e-103/MTSS1_HUMAN Protein MTSS 1 OS=Homo sapiens OX=9606 GN=MTSS1 PE=1 SV=2	crg:105338380/0.0/metastasis suppressor protein 1 isoform X1; K20128 metastasis suppressor protein 1	NA	A0A2C9KDT9/0.0/A0A2C9KDT9_BIOGL Uncharacterized protein OS=Biomphalaria glabrata OX=6526 GN=106055091 PE=4 SV=1	PF08397/1.9E-72/IRSp53/MIM homology domain	2|IPR013606; IMD/I-BAR domain|IPR030127; I-BAR domain containing protein MIM/ABBA	biological_process:GO:0007009//plasma membrane organization;molecular_function:GO:0003779//actin binding;
426_1	5.01221	NA	16218	LLDELEEGEK;NWTSSSSMR	1;1	2	3	0.131	17701;14340;14339	2.09456e+06	261820	XP_008251504.1/2.16709e-49/PREDICTED: ubiquitin-conjugating enzyme E2 variant 1 [Oryctolagus cuniculus]	Q13404/1e-50/UB2V1_HUMAN Ubiquitin-conjugating enzyme E2 variant 1 OS=Homo sapiens OX=9606 GN=UBE2V1 PE=1 SV=2	ocu:100350804/3e-50/UBE2V1; ubiquitin conjugating enzyme E2 V1; K10704 ubiquitin-conjugating enzyme E2 variant	Hs4507795_2/1e-49/[O] KOG0896 Ubiquitin-conjugating enzyme E2	A0A2Y9MQD4/2e-48/A0A2Y9MQD4_DELLE ubiquitin-conjugating enzyme E2 variant 1 OS=Delphinapterus leucas OX=9749 GN=LOC111171742 PE=4 SV=1	PF00179/1.7E-17/Ubiquitin-conjugating enzyme	1|IPR000608; Ubiquitin-conjugating enzyme E2	biological_process:GO:0070534//protein K63-linked ubiquitination;GO:0006355//regulation of transcription, DNA-templated;GO:0045893//positive regulation of transcription, DNA-templated;GO:0006282//regulation of DNA repair;GO:0000209//protein polyubiquitination;GO:0006301//postreplication repair;GO:0000187//activation of MAPK activity;GO:0030154//cell differentiation;GO:0070423//nucleotide-binding …
857_1	2.55608	NA	55352.3	FHGGASWIYNLFK	1	1	1	0.0258	26058	0	0	ACQ72937.1/3.32094e-148/bactericidal permeability increasing protein [Crassostrea gigas]	Q2TBI0/9e-58/LBP_BOVIN Lipopolysaccharide-binding protein OS=Bos taurus OX=9913 GN=LBP PE=2 SV=1	crg:105344847/2e-131/lipopolysaccharide-binding protein-like precursor; K05399 lipopolysaccharide-binding protein	Hs11345448/8e-56/[V] KOG4160 BPI/LBP/CETP family protein	C4NY90/6e-148/C4NY90_CRAGI Bactericidal permeability increasing protein OS=Crassostrea gigas OX=29159 GN=bpi PE=2 SV=1	PTHR10504:SF84/5.2E-89/--	4|IPR001124; Lipid-binding serum glycoprotein, C-terminal|IPR017942; Lipid-binding serum glycoprotein, N-terminal|IPR030181; Bactericidal permeability-increasing protein|IPR032942; BPI/LBP/Plunc family	biological_process:GO:0006955//immune response;GO:0050829//defense response to Gram-negative bacterium;molecular_function:GO:0001530//lipopolysaccharide binding;GO:0008289//lipid binding;
725_1	2.30111	NA	238485	VEADVPGGVR	1	1	1	0.0048	12996	0	0	XP_019927346.1/0/PREDICTED: protein virilizer homolog isoform X3 [Crassostrea gigas]	Q69YN4/0.0/VIR_HUMAN Protein virilizer homolog OS=Homo sapiens OX=9606 GN=VIRMA PE=1 SV=2	crg:105339257/0.0/protein virilizer homolog isoform X2; K22910 protein virilizer	Hs14149698/7e-127/[AT] KOG4822 Predicted nuclear membrane protein involved in mRNA transport and sex determination via splicing modulation	K1QVA4/0.0/K1QVA4_CRAGI Virilizer-like protein OS=Crassostrea gigas OX=29159 GN=CGI_10013984 PE=4 SV=1	PF15912/2.5E-60/Virilizer, N-terminal	2|IPR026736; Protein virilizer|IPR031801; Virilizer, N-terminal	NA
249_1	2.03443	NA	141404	AYQSGCQSSLPR	1	1	1	0.0094	22426	0	0	XP_022340197.1/0/uncharacterized protein LOC111134927 isoform X2 [Crassostrea virginica]	Q8TEP8/1e-80/CE192_HUMAN Centrosomal protein of 192 kDa OS=Homo sapiens OX=9606 GN=CEP192 PE=1 SV=3	crg:105321838/1e-179/uncharacterized protein LOC105321838 isoform X2; K16725 centrosomal protein CEP192	NA	K1S411/4e-171/K1S411_CRAGI Uncharacterized protein OS=Crassostrea gigas OX=29159 GN=CGI_10024642 PE=4 SV=1	PTHR16029/3.0E-172/--	1|IPR039103; Centrosomal protein Spd-2/CEP192	biological_process:GO:0051298//centrosome duplication;GO:0071539//protein localization to centrosome;GO:0090222//centrosome-templated microtubule nucleation;
392_1	4.71145	NA	15784.5	SGHIFVFDR;TGDVVNLR	1;1	2	2	0.1223	14996;10241	177209	19689.9	AAZ76258.1/8.14899e-92/mantle gene 4 [Pinctada fucata]	Q5RJ80/7e-12/CAPR2_DANRE Caprin-2 OS=Danio rerio OX=7955 GN=caprin2 PE=1 SV=1	tru:101066959/7e-13/caprin2; caprin family member 2; K18744 caprin-2	Hs22041041/1e-10/[R] LSE3568 H Complement-c1q tumor necrosis factor-related protein/Adipocyte-specific secretory protein, and related proteins	Q3YL62/1e-91/Q3YL62_PINFU Mantle gene 4 OS=Pinctada fucata OX=50426 PE=2 SV=1	PR00007/4.1E-10/Complement C1Q domain signature	1|IPR001073; C1q domain	NA
131_1	2.96913	NA	49125.7	ESFADIVTETDQAVER	1	1	1	0.0356	28265	0	0	XP_011417866.1/1.87984e-116/PREDICTED: inositol monophosphatase 1 [Crassostrea gigas]	P20456/7e-72/IMPA1_BOVIN Inositol monophosphatase 1 OS=Bos taurus OX=9913 GN=IMPA1 PE=1 SV=1	crg:105321301/3e-117/inositol monophosphatase 1; K01092 myo-inositol-1(or 4)-monophosphatase [EC:3.1.3.25]	Hs5031789/2e-69/[G] KOG2951 Inositol monophosphatase	A0A210QXL8/7e-107/A0A210QXL8_MIZYE Inositol-1-monophosphatase OS=Mizuhopecten yessoensis OX=6573 GN=KP79_PYT13622 PE=3 SV=1	PS00630/-/Inositol monophosphatase family signature 2.	3|IPR000760; Inositol monophosphatase-like|IPR020550; Inositol monophosphatase, conserved site|IPR020583; Inositol monophosphatase, metal-binding site	biological_process:GO:0046854//phosphatidylinositol phosphorylation;
530_1	2.96913	NA	29183.8	DPQHDLDR	1	1	1	0.03	12913	127076	9076.86	KZS21668.1/5.66834e-79/Cytochrome b-c1 complex subunit Rieske, mitochondrial [Daphnia magna]	Q69BJ7/1e-75/UCRI_SAISC Cytochrome b-c1 complex subunit Rieske, mitochondrial OS=Saimiri sciureus OX=9521 GN=UQCRFS1 PE=3 SV=1	obi:106880109/8e-78/cytochrome b-c1 complex subunit Rieske, mitochondrial-like; K00411 ubiquinol-cytochrome c reductase iron-sulfur subunit [EC:7.1.1.8]	Hs5174743/2e-71/[C] KOG1671 Ubiquinol cytochrome c reductase, subunit RIP1	A0A2P8YN35/2e-80/A0A2P8YN35_BLAGE Cytochrome b-c1 complex subunit Rieske, mitochondrial OS=Blattella germanica OX=6973 GN=UQCRFS1_0 PE=4 SV=1	PF02921/1.7E-15/Ubiquinol cytochrome reductase transmembrane region	4|IPR004192; Cytochrome b-c1 complex subunit Rieske, transmembrane domain|IPR005805; Rieske iron-sulphur protein, C-terminal|IPR014349; Rieske iron-sulphur protein|IPR017941; Rieske [2Fe-2S] iron-sulphur domain	biological_process:GO:0055114//oxidation-reduction process;cellular_component:GO:0016020//membrane;molecular_function:GO:0008121//ubiquinol-cytochrome-c reductase activity;GO:0016491//oxidoreductase activity;GO:0016679//oxidoreductase activity, acting on diphenols and related substances as donors;GO:0051537//2 iron, 2 sulfur cluster binding;cellular_component:GO:0005743//mitochondrial inner membr…
715_1	2.50519	NA	25629.9	FLGLAAHLGDSK	1	1	1	0.0515	19169	0	0	XP_022343168.1/1.13703e-37/LOW QUALITY PROTEIN: uncharacterized protein LOC111136541 [Crassostrea virginica]	Q9QYP1/7e-11/LRP4_RAT Low-density lipoprotein receptor-related protein 4 OS=Rattus norvegicus OX=10116 GN=Lrp4 PE=1 SV=2	crg:105342220/1e-34/low-density lipoprotein receptor-related protein 4-like isoform X2; K20051 low-density lipoprotein receptor-related protein 4	Hs22065231/6e-11/[T] KOG1215 Low-density lipoprotein receptors containing Ca2+-binding EGF-like domains	K1PGR2/9e-34/K1PGR2_CRAGI G patch domain-containing protein 1 OS=Crassostrea gigas OX=29159 GN=CGI_10005303 PE=4 SV=1	PF00058/8.5E-8/Low-density lipoprotein receptor repeat class B	1|IPR000033; LDLR class B repeat	NA
412_1	4.33022	NA	22340.1	QTVEEETLR	1	1	1	0.0455	15831	100015	7693.48	XP_011413573.1/3.48058e-92/PREDICTED: ER membrane protein complex subunit 8-like [Crassostrea gigas]	Q5FVL2/8e-50/EMC8_RAT ER membrane protein complex subunit 8 OS=Rattus norvegicus OX=10116 GN=Emc8 PE=2 SV=1	oaa:100073774/2e-21/proteasome activator complex subunit 2-like; K06697 proteasome activator subunit 2 (PA28 beta)	Hs5174615/2e-47/[R] KOG3289 Uncharacterized conserved protein encoded by sequence overlapping the COX4 gene	A0A2T7NGX5/1e-87/A0A2T7NGX5_POMCA Uncharacterized protein OS=Pomacea canaliculata OX=400727 GN=C0Q70_18562 PE=4 SV=1	PF03665/3.1E-59/Uncharacterised protein family (UPF0172)	2|IPR005366; ER membrane protein complex subunit 8/9|IPR037518; MPN domain	NA
379_1	5.56658	NA	13556.3	DPVQVDTLSIR;NKDPVQVDTLSIR	1;1	2	2	0.1048	19548;25155	223698	55924.4	XP_011457130.1/4.90548e-58/PREDICTED: small nuclear ribonucleoprotein Sm D1-like [Crassostrea gigas]	Q9VU02/3e-53/SMD1_DROME Probable small nuclear ribonucleoprotein Sm D1 OS=Drosophila melanogaster OX=7227 GN=SmD1 PE=1 SV=1	crg:105349132/8e-59/small nuclear ribonucleoprotein Sm D1-like; K11087 small nuclear ribonucleoprotein D1	7294552/1e-53/[A] KOG3428 Small nuclear ribonucleoprotein SMD1 and related snRNPs	V4ATJ2/7e-57/V4ATJ2_LOTGI Small nuclear ribonucleoprotein Sm D1 OS=Lottia gigantea OX=225164 GN=LOTGIDRAFT_187321 PE=3 SV=1	PTHR23338/6.0E-49/--	2|IPR001163; LSM domain, eukaryotic/archaea-type|IPR027141; Like-Sm (LSM) domain containing protein, LSm4/SmD1/SmD3	biological_process:GO:0006396//RNA processing;biological_process:GO:0000387//spliceosomal snRNP assembly;cellular_component:GO:0030529//intracellular ribonucleoprotein complex;GO:0019013//viral nucleocapsid;
555_1	4.10933	NA	67453.9	ECHMPFGGR;HWHPECFVCR	1;1	2	2	0.0311	15394;24082	0	0	XP_022339670.1/0/leupaxin-like isoform X7 [Crassostrea virginica]	Q8VI36/4e-162/PAXI_MOUSE Paxillin OS=Mus musculus OX=10090 GN=Pxn PE=1 SV=1	crg:105346995/0.0/transforming growth factor beta-1-induced transcript 1 protein isoform X1; K05760 paxillin	Hs4506345/7e-155/[TZ] KOG1703 Adaptor protein Enigma and related PDZ-LIM proteins	K1QUU3/0.0/K1QUU3_CRAGI Paxillin OS=Crassostrea gigas OX=29159 GN=CGI_10022346 PE=4 SV=1	PTHR24216:SF11/5.0E-167/--	2|IPR001781; Zinc finger, LIM-type|IPR001904; Paxillin	biological_process:GO:0007160//cell-matrix adhesion;cellular_component:GO:0005856//cytoskeleton;
16_3	4.33022	NA	17297.5	DSTLIMQLLR;SASDIAAHDLTSTHPIR	0;1	1	1	0.1776	18116;28155	48408	4400.73	XP_011418135.1/3.31222e-67/PREDICTED: 14-3-3 protein epsilon [Crassostrea gigas] &gt;EKC29146.1 14-3-3 protein epsilon [Crassostrea gigas]	P62262/3e-66/1433E_SHEEP 14-3-3 protein epsilon OS=Ovis aries OX=9940 GN=YWHAE PE=1 SV=1	crg:105321521/5e-68/14-3-3 protein epsilon; K06630 14-3-3 protein epsilon	Hs5803225/1e-66/[O] KOG0841 Multifunctional chaperone (14-3-3 family)	K1R5F2/6e-67/K1R5F2_CRAGI 14-3-3 protein epsilon OS=Crassostrea gigas OX=29159 GN=CGI_10024268 PE=3 SV=1	PF00244/1.6E-52/14-3-3 protein	2|IPR000308; 14-3-3 protein|IPR023410; 14-3-3 domain	molecular_function:GO:0019904//protein domain specific binding;molecular_function:GO:0019904//protein domain specific binding;
700_1	2.43211	NA	123269	IPYSELNSEDK	1	1	1	0.0101	20871	27479.4	381.658	XP_011433622.1/0/PREDICTED: cytospin-A isoform X2 [Crassostrea gigas]	Q2KN98/3e-133/CYTSA_MOUSE Cytospin-A OS=Mus musculus OX=10090 GN=Specc1l PE=1 SV=1	crg:105332653/0.0/cytospin-A isoform X1; K23028 cytospin	Hs17485036/3e-131/[R] KOG4678 FOG: Calponin homology domain	K1PSQ8/0.0/K1PSQ8_CRAGI Cytospin-A OS=Crassostrea gigas OX=29159 GN=CGI_10008472 PE=4 SV=1	PS50021/26.212/Calponin homology (CH) domain profile.	1|IPR001715; Calponin homology domain	molecular_function:GO:0005515//protein binding;
267_1	4.33022	NA	26719.8	IAAGAGSLYYASR	1	1	1	0.0553	21019	0	0	ADU33211.1/7.5163e-77/microsomal glutathione S-transferase 3 [Pinctada martensii]	Q3T100/1e-33/MGST3_BOVIN Microsomal glutathione S-transferase 3 OS=Bos taurus OX=9913 GN=MGST3 PE=2 SV=1	crg:105321515/3e-60/microsomal glutathione S-transferase 3-like; K00799 glutathione S-transferase [EC:2.5.1.18]	Hs4758714/3e-32/[O] TWOG0060 Microsomal glutathione S-transferase	G4WCQ7/1e-76/G4WCQ7_PINIB Microsomal glutathione S-transferase 3 OS=Pinctada imbricata OX=66713 GN=MGST3 PE=2 SV=1	PTHR10250:SF17/9.2E-43/--	1|IPR001129; Membrane-associated, eicosanoid/glutathione metabolism (MAPEG) protein	NA
681_1	2.96913	NA	23682.6	HEQEYMEVR	1	1	1	0.0439	18930	13038.5	1002.96	XP_022344295.1/1.07098e-128/transmembrane emp24 domain-containing protein 2-like [Crassostrea virginica]	Q9R0Q3/8e-115/TMED2_MOUSE Transmembrane emp24 domain-containing protein 2 OS=Mus musculus OX=10090 GN=Tmed2 PE=1 SV=1	crg:105318667/6e-129/transmembrane emp24 domain-containing protein 2; K20347 p24 family protein beta-1	Hs14731618/8e-35/[U] KOG1693 emp24/gp25L/p24 family of membrane trafficking proteins	A0A210QYR3/2e-126/A0A210QYR3_MIZYE RNA methyltransferase-like protein 1 OS=Mizuhopecten yessoensis OX=6573 GN=KP79_PYT15894 PE=3 SV=1	PS50866/22.151/GOLD domain profile.	2|IPR009038; GOLD domain|IPR015720; TMP21-related	NA
537_1	9.29849	NA	36205.5	EHVNILLLGPIGTGK;LESEETLK;TFLSTDVK	1;1;1	3	4	0.0969	26342;26341;11914;11059	207627	8305.07	OPL32633.1/4.10457e-54/hypothetical protein AM593_06913, partial [Mytilus galloprovincialis]	Q8BV66/7e-28/IFI44_MOUSE Interferon-induced protein 44 OS=Mus musculus OX=10090 GN=Ifi44 PE=2 SV=1	NA	Hs5803027/4e-27/[Z] LSE2920 H Interferon-induced, hepatitis C-associated microtubular aggregate protein	A0A194AMN7/0.0/A0A194AMN7_PINFU Uncharacterized protein OS=Pinctada fucata OX=50426 PE=4 SV=1	PTHR14241/1.5E-51/--	NA	NA
864_1	2.53616	NA	36394.4	QTLADIEAR	1	1	1	0.0286	13427	7.28929e+06	455581	XP_021345060.1/2.05319e-179/syntaxin isoform X1 [Mizuhopecten yessoensis] &gt;OWF56626.1 Syntaxin [Mizuhopecten yessoensis]	Q16932/3e-171/STX_APLCA Syntaxin OS=Aplysia californica OX=6500 PE=2 SV=1	myi:110444990/3e-180/syntaxin isoform X1; K04560 syntaxin 1A	7301098/4e-139/[U] KOG0810 SNARE protein Syntaxin 1 and related proteins	A0A210R6V0/4e-179/A0A210R6V0_MIZYE Syntaxin OS=Mizuhopecten yessoensis OX=6573 GN=KP79_PYT16228 PE=3 SV=1	PS50192/20.345/t-SNARE coiled-coil homology domain profile.	4|IPR000727; Target SNARE coiled-coil homology domain|IPR006011; Syntaxin, N-terminal domain|IPR006012; Syntaxin/epimorphin, conserved site|IPR028669; Syntaxin 1A	biological_process:GO:0006886//intracellular protein transport;GO:0016192//vesicle-mediated transport;GO:0017157//regulation of exocytosis;cellular_component:GO:0016020//membrane;GO:0016021//integral component of membrane;molecular_function:GO:0000149//SNARE binding;GO:0005484//SNAP receptor activity;
93_1	2.96913	NA	14874.4	GTVVLELQK	1	1	1	0.0687	12702	4.54369e+06	567961	ABO26662.1/8.7734e-16/sialic acid binding lectin [Haliotis discus discus]	Q4ZJM9/4e-16/C1QL4_MOUSE Complement C1q-like protein 4 OS=Mus musculus OX=10090 GN=C1ql4 PE=1 SV=1	ola:101161935/1e-11/caprin2; caprin-2 isoform X1; K18744 caprin-2	Hs20473753/2e-14/[R] LSE3568 H Complement-c1q tumor necrosis factor-related protein/Adipocyte-specific secretory protein, and related proteins	B6RB58/2e-15/B6RB58_HALDI Sialic acid binding lectin OS=Haliotis discus discus OX=91233 PE=2 SV=1	PTHR22923:SF68/1.3E-21/--	1|IPR001073; C1q domain	NA
501_1	2.96913	NA	91292.7	GILLFGPPGTGK	1	1	1	0.0146	17234	114525	2160.85	EKC19617.1/0/Vesicle-fusing ATPase 1 [Crassostrea gigas]	P46459/0.0/NSF_HUMAN Vesicle-fusing ATPase OS=Homo sapiens OX=9606 GN=NSF PE=1 SV=3	crg:105347797/0.0/vesicle-fusing ATPase 1; K06027 vesicle-fusing ATPase [EC:3.6.4.6]	7292852/0.0/[O] KOG0741 AAA+-type ATPase	K1P7K8/0.0/K1P7K8_CRAGI Vesicle-fusing ATPase 1 OS=Crassostrea gigas OX=29159 GN=CGI_10008099 PE=4 SV=1	SM00382/3.9E-17/--	5|IPR003338; CDC48, N-terminal subdomain|IPR003593; AAA+ ATPase domain|IPR003959; ATPase, AAA-type, core|IPR003960; ATPase, AAA-type, conserved site|IPR004201; CDC48, domain 2	molecular_function:GO:0005524//ATP binding;
240_1	2.96913	NA	105494	WLQFPEPSR	1	1	1	0.0094	17301	124535	2767.44	XP_019918615.1/0/PREDICTED: uncharacterized protein LOC105317890 [Crassostrea gigas]	Q14974/0.0/IMB1_HUMAN Importin subunit beta-1 OS=Homo sapiens OX=9606 GN=KPNB1 PE=1 SV=2	crg:105317890/0.0/uncharacterized protein LOC105317890; K14293 importin subunit beta-1	Hs19923142/0.0/[YU] KOG1241 Karyopherin (importin) beta 1	K1R2V1/0.0/K1R2V1_CRAGI Importin subunit beta-1 OS=Crassostrea gigas OX=29159 GN=CGI_10019491 PE=4 SV=1	PTHR10527/0.0/--	2|IPR001494; Importin-beta, N-terminal domain|IPR021133; HEAT, type 2	biological_process:GO:0006886//intracellular protein transport;molecular_function:GO:0008536//Ran GTPase binding;
92_1	2.05305	NA	32464.9	ACDYIQELR	1	1	1	0.03	17516	39538.3	3041.41	XP_011422627.1/3.33245e-159/PREDICTED: upstream stimulatory factor 2 isoform X3 [Crassostrea gigas]	Q15853/3e-93/USF2_HUMAN Upstream stimulatory factor 2 OS=Homo sapiens OX=9606 GN=USF2 PE=1 SV=1	crg:105325006/6e-154/upstream stimulatory factor 1 isoform X1; K09106 upstream stimulatory factor	Hs4507847/1e-93/[K] KOG1318 Helix loop helix transcription factor EB	K1Q419/3e-157/K1Q419_CRAGI Upstream stimulatory factor 2 OS=Crassostrea gigas OX=29159 GN=CGI_10027128 PE=4 SV=1	PS50888/17.314/Myc-type, basic helix-loop-helix (bHLH) domain profile.	1|IPR011598; Myc-type, basic helix-loop-helix (bHLH) domain	molecular_function:GO:0046983//protein dimerization activity;
604_1	7.29935	NA	22431	IFIGGLSYETTDDTLK;SGQNVDLSNPENEAYR	1;1	2	2	0.1517	28010;28165	0	0	XP_022299571.1/1.26296e-63/LOW QUALITY PROTEIN: heterogeneous nuclear ribonucleoprotein A1, A2/B1 homolog [Crassostrea virginica]	P51989/3e-51/RO21_XENLA Heterogeneous nuclear ribonucleoprotein A2 homolog 1 OS=Xenopus laevis OX=8355 PE=2 SV=1	crg:105333434/2e-63/heterogeneous nuclear ribonucleoprotein A1, A2/B1 homolog isoform X1; K12741 heterogeneous nuclear ribonucleoprotein A1/A3	Hs4504447/3e-51/[R] KOG0118 FOG: RRM domain	K1QXS6/2e-62/K1QXS6_CRAGI Heterogeneous nuclear ribonucleoprotein A2-like protein 1 OS=Crassostrea gigas OX=29159 GN=CGI_10028469 PE=4 SV=1	PTHR43921:SF2/1.6E-66/--	1|IPR000504; RNA recognition motif domain	molecular_function:GO:0003676//nucleic acid binding;cellular_component:GO:0030529//intracellular ribonucleoprotein complex;GO:0019013//viral nucleocapsid;molecular_function:GO:0003723//RNA binding;
40_1	2.07466	NA	68200.3	AMAAEAEATR;LPIQLQR;LPVQLQR	0;0;1	1	1	0.0393	13520;10092;9824	0	0	XP_011417150.1/6.82099e-146/PREDICTED: band 7 protein AAEL010189 [Crassostrea gigas]	Q27433/3e-115/MEC2_CAEEL Mechanosensory protein 2 OS=Caenorhabditis elegans OX=6239 GN=mec-2 PE=1 SV=1	crg:105320780/1e-146/band 7 protein AAEL010189; K17286 erythrocyte band 7 integral membrane protein	CE04393/1e-115/[C] KOG2621 Prohibitins and stomatins of the PID superfamily	A0A3M6T778/0.0/A0A3M6T778_9CNID Uncharacterized protein OS=Pocillopora damicornis OX=46731 GN=pdam_00010691 PE=4 SV=1	PTHR10264:SF96/1.5E-270/--	3|IPR001107; Band 7 domain|IPR001972; Stomatin family|IPR018080; Band 7/stomatin-like, conserved site	cellular_component:GO:0016020//membrane;
446_1	2.08328	NA	61213	LLDDLPR	1	1	1	0.0128	9477	148605	6461.1	XP_022343382.1/1.18026e-108/caspase-2-like [Crassostrea virginica]	P29594/7e-42/CASP2_MOUSE Caspase-2 OS=Mus musculus OX=10090 GN=Casp2 PE=1 SV=5	crg:105325341/2e-107/cell death protein 3; K04397 caspase 7 [EC:3.4.22.60]	Hs14790178/1e-40/[D] KOG3573 Caspase, apoptotic cysteine protease	B9VQC0/5e-46/B9VQC0_PATPE Caspase 3/9 OS=Patiria pectinifera OX=7594 PE=2 SV=1	PTHR10454/2.0E-73/--	5|IPR001309; Peptidase C14, p20 domain|IPR001315; CARD domain|IPR002138; Peptidase C14, caspase non-catalytic subunit p10|IPR015917; Peptidase C14A, caspase catalytic domain|IPR033171; Caspase-9	biological_process:GO:0006508//proteolysis;GO:0006915//apoptotic process;GO:0042981//regulation of apoptotic process;molecular_function:GO:0004197//cysteine-type endopeptidase activity;GO:0008234//cysteine-type peptidase activity;
352_1	2.43211	NA	94294.2	QEEELSVTK	1	1	1	0.0109	14567	533975	9050.43	XP_011449174.1/0/PREDICTED: mitofusin-2-like isoform X2 [Crassostrea gigas]	Q8R500/0.0/MFN2_RAT Mitofusin-2 OS=Rattus norvegicus OX=10116 GN=Mfn2 PE=1 SV=1	crg:105343476/0.0/mitofusin-2-like isoform X1; K06030 mitofusin 2 [EC:3.6.5.-]	Hs7662004/0.0/[O] KOG0448 Mitofusin 1 GTPase, involved in mitochondrila biogenesis	A0A210R562/0.0/A0A210R562_MIZYE Mitofusin-2 OS=Mizuhopecten yessoensis OX=6573 GN=KP79_PYT21541 PE=3 SV=1	PTHR10465/9.0E-275/--	5|IPR006884; Fzo/mitofusin HR2 domain|IPR022812; Dynamin superfamily|IPR027088; Mitofusin-1|IPR027094; Mitofusin family|IPR030381; Dynamin-type guanine nucleotide-binding (G) domain	biological_process:GO:0008053//mitochondrial fusion;cellular_component:GO:0005741//mitochondrial outer membrane;GO:0016021//integral component of membrane;molecular_function:GO:0003924//GTPase activity;GO:0005525//GTP binding;
825_1	2.23265	NA	61753.8	SHNFVELR	1	1	1	0.0145	13083	170449	5326.54	XP_019922832.1/2.23962e-29/PREDICTED: uncharacterized protein LOC105328402 isoform X2 [Crassostrea gigas] &gt;EKC25237.1 E3 ubiquitin-protein ligase TRIM33 [Crassostrea gigas]	E7FAM5/3e-10/LIN41_DANRE E3 ubiquitin-protein ligase TRIM71 OS=Danio rerio OX=7955 GN=trim71 PE=1 SV=1	crg:105336110/3e-14/tripartite motif-containing protein 45; K11997 tripartite motif-containing protein 2/3	7300637/4e-09/[O] KOG2177 Predicted E3 ubiquitin ligase	K1PMK0/4e-29/K1PMK0_CRAGI E3 ubiquitin-protein ligase TRIM33 OS=Crassostrea gigas OX=29159 GN=CGI_10011952 PE=4 SV=1	PTHR43989/1.8E-25/--	1|IPR000315; B-box-type zinc finger	cellular_component:GO:0005622//intracellular;molecular_function:GO:0008270//zinc ion binding;cellular_component:GO:0005622//intracellular;molecular_function:GO:0008270//zinc ion binding;GO:0016874//ligase activity;
881_1	2.21821	NA	49622.9	YLHPPQHLR	1	1	1	0.0198	17332	133454	7850.21	XP_022339557.1/0/muscleblind-like protein 1 isoform X5 [Crassostrea virginica]	Q9NUK0/1e-86/MBNL3_HUMAN Muscleblind-like protein 3 OS=Homo sapiens OX=9606 GN=MBNL3 PE=1 SV=2	crg:105330717/0.0/muscleblind-like protein 2 isoform X1; K14943 muscleblind	Hs19387844/4e-87/[K] KOG2494 C3H1-type Zn-finger protein	K1PKC4/8e-168/K1PKC4_CRAGI Muscleblind-like protein 3 (Fragment) OS=Crassostrea gigas OX=29159 GN=CGI_10008565 PE=4 SV=1	PTHR12675/4.5E-113/--	1|IPR000571; Zinc finger, CCCH-type	molecular_function:GO:0046872//metal ion binding;
200_1	4.33022	NA	13628.5	AMSIMNSFVNDIFER	1	1	1	0.122	28238	0	0	XP_011416642.1/3.28595e-83/PREDICTED: histone H2B [Crassostrea gigas] &gt;XP_022313753.1 histone H2B [Crassostrea virginica] &gt;XP_022313754.1 histone H2B [Crassostrea virginica] &gt;XP_022313755.1 histone H2B [Crassostrea virginica] &gt;XP_022314084.1 histone H2B [Crassostrea virginica] &gt;XP_022314085.1 histone H2B [Crassostrea virginica] &gt;XP_022314086.1 histone H2B [Crassostrea virginica]…	P35069/8e-71/H2B3_TIGCA Histone H2B.3 OS=Tigriopus californicus OX=6832 PE=3 SV=2	crg:105320409/5e-84/histone H2B; K11252 histone H2B	Hs4504259/1e-67/[B] KOG1744 Histone H2B	K1R2K6/6e-83/K1R2K6_CRAGI Histone H2B OS=Crassostrea gigas OX=29159 GN=CGI_10008057 PE=3 SV=1	PR00621/1.1E-52/Histone H2B signature	2|IPR000558; Histone H2B|IPR007125; Histone H2A/H2B/H3	cellular_component:GO:0000786//nucleosome;molecular_function:GO:0003677//DNA binding;cellular_component:GO:0005634//nucleus;GO:0000786//nucleosome;molecular_function:GO:0003677//DNA binding;GO:0046982//protein heterodimerization activity;
229_1	2.96913	NA	59629.4	ITEGLFDPSIIK	1	1	1	0.0226	21851	0	0	XP_022338696.1/2.32305e-174/LOW QUALITY PROTEIN: actin-like protein 6A [Crassostrea virginica]	O96019/1e-129/ACL6A_HUMAN Actin-like protein 6A OS=Homo sapiens OX=9606 GN=ACTL6A PE=1 SV=1	crg:105348702/7e-173/actin-like protein 6B; K11652 actin-like protein 6B	Hs4757718/6e-130/[Z] KOG0679 Actin-related protein - Arp4p/Act3p	A0A146MT17/0.0/A0A146MT17_FUNHE Actin 6A-like protein OS=Fundulus heteroclitus OX=8078 PE=3 SV=1	SM00268/2.5E-117/--	2|IPR004000; Actin family|IPR004001; Actin, conserved site	NA
799_1	2.55608	NA	145007	HQEDVIVK	1	1	1	0.0063	12316	139631	1662.28	XP_011421657.1/0/PREDICTED: uncharacterized protein LOC105324266 isoform X1 [Crassostrea gigas]	Q3UIL6/2e-12/PKHA7_MOUSE Pleckstrin homology domain-containing family A member 7 OS=Mus musculus OX=10090 GN=Plekha7 PE=1 SV=2	NA	7299806/7e-27/[T] TWOG0137 Phosphoinositol 3-phosphate-binding protein	K1QJ90/0.0/K1QJ90_CRAGI Pleckstrin-like protein domain-containing family A member 7 OS=Crassostrea gigas OX=29159 GN=CGI_10013082 PE=4 SV=1	PTHR12752/3.6E-26/--	NA	NA
859_1	4.96827	NA	18857.3	FEVWAPR;VCGVQSFYTPR	1;1	2	2	0.1104	10921;21368	0	0	XP_022341714.1/5.44577e-64/centromere protein V-like isoform X2 [Crassostrea virginica]	Q7Z7K6/3e-56/CENPV_HUMAN Centromere protein V OS=Homo sapiens OX=9606 GN=CENPV PE=1 SV=1	NA	Hs22063320/1e-56/[S] KOG4192 Uncharacterized conserved protein	A0A0G4EUA5/1e-59/A0A0G4EUA5_VITBC Uncharacterized protein OS=Vitrella brassicaformis (strain CCMP3155) OX=1169540 GN=Vbra_13542 PE=4 SV=1	PTHR28620/3.6E-62/--	1|IPR006913; Glutathione-dependent formaldehyde-activating enzyme/centromere protein V	biological_process:GO:0008152//metabolic process;molecular_function:GO:0016846//carbon-sulfur lyase activity;
468_1	4.69867	NA	51640.7	GLGLDDALEAR;LLIISTSPYQEK	1;1	2	2	0.0493	16510;23350	121310	4332.5	XP_011434376.1/0/PREDICTED: ruvB-like 2 isoform X1 [Crassostrea gigas]	Q9DE27/0.0/RUVB2_XENLA RuvB-like 2 OS=Xenopus laevis OX=8355 GN=ruvbl2 PE=2 SV=1	crg:105333220/0.0/ruvB-like 2 isoform X1; K11338 RuvB-like protein 2 [EC:3.6.4.12]	Hs5730023/0.0/[K] KOG2680 DNA helicase TIP49, TBP-interacting protein	A0A210QDU4/0.0/A0A210QDU4_MIZYE RuvB-like helicase OS=Mizuhopecten yessoensis OX=6573 GN=KP79_PYT01373 PE=3 SV=1	PF06068/5.8E-186/TIP49 C-terminus	4|IPR003593; AAA+ ATPase domain|IPR010339; TIP49, C-terminal|IPR027238; RuvB-like|IPR037942; RuvB-like helicase 2	cellular_component:GO:0031011//Ino80 complex;GO:0035267//NuA4 histone acetyltransferase complex;GO:0097255//R2TP complex;molecular_function:GO:0003678//DNA helicase activity;GO:0005524//ATP binding;GO:0043141//ATP-dependent 5'-3' DNA helicase activity;
233_1	2.96913	NA	52028.4	SIIVTTTSWLGGK	1	1	1	0.028	22652	2830.55	166.503	XP_011413862.1/0/PREDICTED: cell cycle control protein 50A isoform X2 [Crassostrea gigas]	Q5F362/2e-107/CC50A_CHICK Cell cycle control protein 50A OS=Gallus gallus OX=9031 GN=TMEM30A PE=2 SV=1	dpte:113797718/7e-45/LOW QUALITY PROTEIN: UDP-N-acetylhexosamine pyrophosphorylase-like; K00972 UDP-N-acetylglucosamine/UDP-N-acetylgalactosamine diphosphorylase [EC:2.7.7.23 2.7.7.83]	7293231/6e-111/[DKT] KOG2952 Cell cycle control protein	K1PGE2/0.0/K1PGE2_CRAGI Cell cycle control protein 50A OS=Crassostrea gigas OX=29159 GN=CGI_10001010 PE=3 SV=1	PTHR10926:SF46/9.2E-135/--	1|IPR005045; CDC50/LEM3 family	cellular_component:GO:0016020//membrane;
779_1	5.28627	NA	40662	AMGDEFEER;NLAADYINYR	1;1	2	2	0.0537	15140;18737	637778	30370.4	XP_021352428.1/1.75636e-77/bcl-2-like protein 2 isoform X2 [Mizuhopecten yessoensis]	P53563/4e-36/B2CL1_RAT Bcl-2-like protein 1 OS=Rattus norvegicus OX=10116 GN=Bcl2l1 PE=1 SV=2	crg:105343381/7e-66/bcl-2-like protein 1; K04570 Bcl-2-like 1 (apoptosis regulator Bcl-X)	Hs20336335/3e-36/[T] KOG4728 Anti-apoptotic Bcl-2 family proteins, prevent opening of mitochondrial porin channel	R4JQR8/3e-69/R4JQR8_MYTGA Bcl2 protein OS=Mytilus galloprovincialis OX=29158 GN=Bcl2 PE=2 SV=1	PTHR11256/1.4E-112/--	4|IPR002475; Bcl2-like|IPR003093; Apoptosis regulator, Bcl-2 protein, BH4|IPR020717; Apoptosis regulator, Bcl-2, BH1 motif, conserved site|IPR026298; Blc2 family	biological_process:GO:0042981//regulation of apoptotic process;
884_1	10.7047	NA	20043.5	AIGLNDYWHK;CSQAVYAAEER;TVYDAER	1;1;1	3	4	0.1522	18822;18821;20600;9815	140128	10009.2	XP_011440910.1/1.55201e-108/PREDICTED: muscle LIM protein 1 [Crassostrea gigas] &gt;XP_011440912.1 PREDICTED: muscle LIM protein 1 [Crassostrea gigas]	P47875/1e-48/CSRP1_RAT Cysteine and glycine-rich protein 1 OS=Rattus norvegicus OX=10116 GN=Csrp1 PE=1 SV=2	crg:105337742/2e-109/muscle LIM protein 1; K09377 cysteine and glycine-rich protein	Hs4503101/2e-48/[TZ] KOG1700 Regulatory protein MLP and related LIM proteins	K1R781/5e-108/K1R781_CRAGI Muscle LIM protein Mlp84B OS=Crassostrea gigas OX=29159 GN=CGI_10003462 PE=4 SV=1	PS50023/11.89/LIM domain profile.	1|IPR001781; Zinc finger, LIM-type	NA
283_1	2.43211	NA	105263	IQSIVAVDDIGR	1	1	1	0.0128	20705	0	0	OWF51946.1/7.05301e-37/Nuclear transcription factor Y subunit alpha [Mizuhopecten yessoensis]	P23708/1e-35/NFYA_MOUSE Nuclear transcription factor Y subunit alpha OS=Mus musculus OX=10090 GN=Nfya PE=1 SV=2	myi:110448438/2e-37/nuclear transcription factor Y subunit alpha-like; K08064 nuclear transcription factor Y, alpha	Hs11496974/6e-36/[K] KOG1561 CCAAT-binding factor, subunit B (HAP2)	A0A210QT77/1e-36/A0A210QT77_MIZYE Nuclear transcription factor Y subunit alpha OS=Mizuhopecten yessoensis OX=6573 GN=KP79_PYT18478 PE=4 SV=1	PTHR12632/3.9E-46/--	2|IPR001289; Nuclear transcription factor Y subunit A|IPR018362; CCAAT-binding factor, conserved site	biological_process:GO:0006355//regulation of transcription, DNA-templated;cellular_component:GO:0016602//CCAAT-binding factor complex;molecular_function:GO:0003677//DNA binding;GO:0003700//DNA binding transcription factor activity;
88_1	4.33022	NA	49523.4	QGPTIHVQGR	1	1	2	0.0221	15471;15472	395121	15196.9	XP_011434348.1/0/PREDICTED: 2-amino-3-ketobutyrate coenzyme A ligase, mitochondrial [Crassostrea gigas]	O75600/0.0/KBL_HUMAN 2-amino-3-ketobutyrate coenzyme A ligase, mitochondrial OS=Homo sapiens OX=9606 GN=GCAT PE=1 SV=1	crg:105333195/0.0/2-amino-3-ketobutyrate coenzyme A ligase, mitochondrial; K00639 glycine C-acetyltransferase [EC:2.3.1.29]	7294669/0.0/[E] KOG1359 Glycine C-acetyltransferase/2-amino-3-ketobutyrate-CoA ligase	K1S3Y1/0.0/K1S3Y1_CRAGI 2-amino-3-ketobutyrate coenzyme A ligase, mitochondrial (Fragment) OS=Crassostrea gigas OX=29159 GN=CGI_10025279 PE=3 SV=1	PTHR13693/1.1E-214/--	3|IPR001917; Aminotransferase, class-II, pyridoxal-phosphate binding site|IPR004839; Aminotransferase, class I/classII|IPR011282; 2-amino-3-ketobutyrate coenzyme A ligase	biological_process:GO:0006567//threonine catabolic process;GO:0008152//metabolic process;GO:0009058//biosynthetic process;molecular_function:GO:0008890//glycine C-acetyltransferase activity;GO:0016740//transferase activity;GO:0030170//pyridoxal phosphate binding;biological_process:GO:0009058//biosynthetic process;GO:0006567//threonine catabolic process;molecular_function:GO:0030170//pyridoxal pho…
455_1	2.08328	NA	31409.5	LEDIKDEQNLR	1	1	1	0.0396	22927	31725.6	2115.04	XP_022339491.1/6.45165e-136/pleckstrin homology domain-containing family F member 2-like isoform X3 [Crassostrea virginica]	Q7ZUV1/4e-108/PKHF2_DANRE Pleckstrin homology domain-containing family F member 2 OS=Danio rerio OX=7955 GN=plekhf2 PE=2 SV=1	egl:EGR_00549/2e-38/TFIIH basal transcription factor complex helicase subunit; K10844 DNA excision repair protein ERCC-2 [EC:3.6.4.12]	Hs13375827/2e-107/[R] KOG1729 FYVE finger containing protein	K1P8I1/6e-130/K1P8I1_CRAGI Pleckstrin-like protein domain-containing family F member 2 (Fragment) OS=Crassostrea gigas OX=29159 GN=CGI_10007103 PE=4 SV=1	SM00233/1.8E-12/--	3|IPR000306; FYVE zinc finger|IPR001849; Pleckstrin homology domain|IPR017455; Zinc finger, FYVE-related	molecular_function:GO:0046872//metal ion binding;
179_1	2.96913	NA	58678.4	YSLLDQIEFR	1	1	1	0.0183	20607	75805.9	2707.35	XP_011444882.2/3.60588e-138/PREDICTED: uncharacterized protein LOC105340509 [Crassostrea gigas]	O14867/1e-08/BACH1_HUMAN Transcription regulator protein BACH1 OS=Homo sapiens OX=9606 GN=BACH1 PE=1 SV=2	myi:110459952/9e-93/uncharacterized protein LOC110459952 isoform X1; K21754 BTB/POZ domain-containing protein KCTD1/15	Hs4502353/4e-09/[K] KOG3863 bZIP transcription factor NRF1	K1Q6V9/3e-123/K1Q6V9_CRAGI Kelch-like protein 28 OS=Crassostrea gigas OX=29159 GN=CGI_10027423 PE=4 SV=1	SM00225/1.8E-8/--	2|IPR000210; BTB/POZ domain|IPR030605; Kelch-like protein 8	biological_process:GO:0016567//protein ubiquitination;cellular_component:GO:0031463//Cul3-RING ubiquitin ligase complex;molecular_function:GO:0005515//protein binding;
870_1	2.96913	NA	211300	YSNELYELQASR	1	1	1	0.0059	24905	96316.4	1250.86	XP_022298534.1/0/LOW QUALITY PROTEIN: host cell factor 1-like [Crassostrea virginica]	P51611/0.0/HCFC1_MESAU Host cell factor 1 OS=Mesocricetus auratus OX=10036 GN=HCFC1 PE=1 SV=1	crg:105337992/0.0/host cell factor 1 isoform X1; K14966 host cell factor	Hs14768289/0.0/[DK] KOG4152 Host cell transcription factor HCFC1	K1PYA2/0.0/K1PYA2_CRAGI Host cell factor OS=Crassostrea gigas OX=29159 GN=CGI_10017362 PE=4 SV=1	SM00060/15.0/--	3|IPR003961; Fibronectin type III|IPR006652; Kelch repeat type 1|IPR037854; Host cell factor 1	cellular_component:GO:0048188//Set1C/COMPASS complex;GO:0071339//MLL1 complex;molecular_function:GO:0005515//protein binding;
76_1	2.96913	NA	10408.3	NELHHLLDKPQLQGIPVLVLGNK	1	1	2	0.2527	31866;31867	1.32544e+06	220907	XP_011439006.1/4.80168e-60/PREDICTED: ADP-ribosylation factor-like protein 8A [Crassostrea gigas] &gt;EKC42723.1 ADP-ribosylation factor-like protein 8A [Crassostrea gigas]	Q96BM9/4e-56/ARL8A_HUMAN ADP-ribosylation factor-like protein 8A OS=Homo sapiens OX=9606 GN=ARL8A PE=1 SV=1	crg:105336396/7e-61/ADP-ribosylation factor-like protein 8A; K07955 ADP-ribosylation factor-like protein 8	Hs20270343/2e-56/[R] KOG0075 GTP-binding ADP-ribosylation factor-like protein	K1RAE9/9e-60/K1RAE9_CRAGI ADP-ribosylation factor-like protein 8A OS=Crassostrea gigas OX=29159 GN=CGI_10016837 PE=3 SV=1	PF00025/2.2E-17/ADP-ribosylation factor family	1|IPR006689; Small GTPase superfamily, ARF/SAR type	molecular_function:GO:0005525//GTP binding;biological_process:GO:0007264//small GTPase mediated signal transduction;cellular_component:GO:0005622//intracellular;molecular_function:GO:0005525//GTP binding;
767_1	2.55608	NA	52710.2	IAPIYEER	1	1	1	0.0174	12794	0	0	XP_011419679.1/0/PREDICTED: alpha-L-fucosidase [Crassostrea gigas] &gt;XP_011419680.1 PREDICTED: alpha-L-fucosidase [Crassostrea gigas] &gt;EKC34412.1 Plasma alpha-L-fucosidase [Crassostrea gigas]	C3YWU0/0.0/FUCO_BRAFL Alpha-L-fucosidase OS=Branchiostoma floridae OX=7739 GN=BRAFLDRAFT_56888 PE=3 SV=2	crg:105322568/0.0/alpha-L-fucosidase; K01206 alpha-L-fucosidase [EC:3.2.1.51]	Hs4503803/0.0/[G] KOG3340 Alpha-L-fucosidase	K1QC26/0.0/K1QC26_CRAGI Plasma alpha-L-fucosidase OS=Crassostrea gigas OX=29159 GN=CGI_10025772 PE=3 SV=1	SM00812/2.1E-208/--	4|IPR000933; Glycoside hydrolase, family 29|IPR016286; Alpha-L-fucosidase, metazoa-type|IPR018526; Glycoside hydrolase, family 29, conserved site|IPR031919; Alpha-L-fucosidase, C-terminal	biological_process:GO:0005975//carbohydrate metabolic process;GO:0006004//fucose metabolic process;molecular_function:GO:0004560//alpha-L-fucosidase activity;biological_process:GO:0006004//fucose metabolic process;molecular_function:GO:0004560//alpha-L-fucosidase activity;
85_1	6.44262	NA	55367	LAIIPGGGGTQR;LGLVETR	1;1	2	2	0.0388	16744;8459	830185	27672.8	XP_011415065.1/1.19105e-134/PREDICTED: methylglutaconyl-CoA hydratase, mitochondrial isoform X2 [Crassostrea gigas]	Q13825/3e-92/AUHM_HUMAN Methylglutaconyl-CoA hydratase, mitochondrial OS=Homo sapiens OX=9606 GN=AUH PE=1 SV=1	crg:105319285/6e-130/methylglutaconyl-CoA hydratase, mitochondrial isoform X1; K05607 methylglutaconyl-CoA hydratase [EC:4.2.1.18]	Hs4502327/1e-92/[I] KOG1679 Enoyl-CoA hydratase	K1QNC9/5e-129/K1QNC9_CRAGI Methylglutaconyl-CoA hydratase, mitochondrial (Fragment) OS=Crassostrea gigas OX=29159 GN=CGI_10000759 PE=3 SV=1	PTHR11941:SF12/2.3E-107/--	2|IPR001753; Enoyl-CoA hydratase/isomerase|IPR018376; Enoyl-CoA hydratase/isomerase, conserved site	biological_process:GO:0008152//metabolic process;molecular_function:GO:0003824//catalytic activity;
769_1	2.96913	NA	76179.2	SECPENEHNNYIVETK	1	1	1	0.0239	29182	0	0	XP_022298448.1/0/LOW QUALITY PROTEIN: protein DD3-3-like [Crassostrea virginica]	Q58A42/5e-103/DD3_DICDI Protein DD3-3 OS=Dictyostelium discoideum OX=44689 GN=DD3-3 PE=2 SV=1	NA	NA	K1QER7/0.0/K1QER7_CRAGI Uncharacterized protein OS=Crassostrea gigas OX=29159 GN=CGI_10013827 PE=4 SV=1	PTHR35170/8.0E-295/--	NA	NA
405_1	5.08153	NA	52350	EHLLLAR;YDEIDHAPEEK	1;1	2	2	0.0383	9792;22284	31352.8	1045.09	XP_005112685.1/0/PREDICTED: elongation factor Tu, mitochondrial-like [Aplysia californica]	P49411/5e-170/EFTU_HUMAN Elongation factor Tu, mitochondrial OS=Homo sapiens OX=9606 GN=TUFM PE=1 SV=2	lak:106153750/0.0/uncharacterized protein LOC106153750 isoform X1; K02358 elongation factor Tu	7303306/4e-173/[J] KOG0460 Mitochondrial translation elongation factor Tu	A0A433SNP0/0.0/A0A433SNP0_ELYCH Elongation factor Tu OS=Elysia chlorotica OX=188477 GN=EGW08_021402 PE=3 SV=1	PR00315/1.4E-20/GTP-binding elongation factor signature	3|IPR000795; Transcription factor, GTP-binding domain|IPR004160; Translation elongation factor EFTu/EF1A, C-terminal|IPR004161; Translation elongation factor EFTu-like, domain 2	molecular_function:GO:0003924//GTPase activity;GO:0005525//GTP binding;cellular_component:GO:0005622//intracellular;molecular_function:GO:0003746//translation elongation factor activity;GO:0005525//GTP binding;GO:0003924//GTPase activity;
878_1	2.69833	NA	36180.5	LEEEEISDK	1	1	1	0.0274	15425	3.41878e+06	201105	XP_022300019.1/2.56629e-174/prostaglandin reductase 1-like [Crassostrea virginica] &gt;XP_022300020.1 prostaglandin reductase 1-like [Crassostrea virginica]	Q3SZJ4/2e-109/PTGR1_BOVIN Prostaglandin reductase 1 OS=Bos taurus OX=9913 GN=PTGR1 PE=2 SV=1	crg:105333322/2e-171/prostaglandin reductase 1; K13948 prostaglandin reductase 1 [EC:1.3.1.74 1.3.1.48]	Hs13236495/9e-11/[CR] KOG1198 Zinc-binding oxidoreductase	K1PT33/2e-170/K1PT33_CRAGI Prostaglandin reductase 1 OS=Crassostrea gigas OX=29159 GN=CGI_10010805 PE=4 SV=1	PF16884/7.6E-27/N-terminal domain of oxidoreductase	2|IPR013149; Alcohol dehydrogenase, C-terminal|IPR020843; Polyketide synthase, enoylreductase domain	biological_process:GO:0055114//oxidation-reduction process;molecular_function:GO:0016491//oxidoreductase activity;molecular_function:GO:0016491//oxidoreductase activity;
456_1	2.53616	NA	141088	YTPQEEDPVGR	1	1	1	0.0087	20793	83413.6	1324.03	XP_011411896.1/0/PREDICTED: wings apart-like protein homolog isoform X3 [Crassostrea gigas] &gt;XP_011411897.1 PREDICTED: wings apart-like protein homolog isoform X4 [Crassostrea gigas]	Q7Z5K2/6e-157/WAPL_HUMAN Wings apart-like protein homolog OS=Homo sapiens OX=9606 GN=WAPL PE=1 SV=1	NA	Hs18574764/8e-157/[D] KOG2152 Sister chromatid cohesion protein	A0A210R2M8/0.0/A0A210R2M8_MIZYE Wings apart-like protein-like OS=Mizuhopecten yessoensis OX=6573 GN=KP79_PYT06352 PE=4 SV=1	PS51271/143.233/WAPL domain profile.	2|IPR012502; WAPL domain|IPR022771; Wings apart-like protein	NA
269_1	2.96913	NA	109608	HYGVVSCEGCK	1	1	1	0.0108	20883	278731	7963.76	XP_011438114.1/0/PREDICTED: orphan steroid hormone receptor 2 isoform X1 [Crassostrea gigas] &gt;XP_011438116.1 PREDICTED: orphan steroid hormone receptor 2 isoform X1 [Crassostrea gigas] &gt;EKC31918.1 Nuclear receptor subfamily 2 group C member 2 [Crassostrea gigas]	P49116/1e-169/NR2C2_HUMAN Nuclear receptor subfamily 2 group C member 2 OS=Homo sapiens OX=9606 GN=NR2C2 PE=1 SV=1	crg:105335746/0.0/orphan steroid hormone receptor 2 isoform X1; K08544 testicular receptor 4	Hs4507675/3e-166/[T] KOG3575 FOG: Hormone receptors	K1QD54/0.0/K1QD54_CRAGI Nuclear receptor subfamily 2 group C member 2 OS=Crassostrea gigas OX=29159 GN=CGI_10018902 PE=3 SV=1	PS00031/-/Nuclear hormones receptors DNA-binding region signature.	3|IPR000536; Nuclear hormone receptor, ligand-binding domain|IPR001628; Zinc finger, nuclear hormone receptor-type|IPR001723; Nuclear hormone receptor	biological_process:GO:0006355//regulation of transcription, DNA-templated;cellular_component:GO:0005634//nucleus;molecular_function:GO:0003677//DNA binding;GO:0003700//DNA binding transcription factor activity;GO:0003707//steroid hormone receptor activity;GO:0008270//zinc ion binding;GO:0043565//sequence-specific DNA binding;biological_process:GO:0006351//transcription, DNA-templated;cellular_com…
263_1	6.88631	NA	20606.4	GVGDFVFWHVPQIK;NFTPSPWIQFINAHGDR	1;1	2	2	0.1732	26967;29420	0	0	XP_012055197.1/1.52274e-49/PREDICTED: probable 28S ribosomal protein S25, mitochondrial [Atta cephalotes]	Q9VY28/2e-42/RT25_DROME Probable 28S ribosomal protein S25, mitochondrial OS=Drosophila melanogaster OX=7227 GN=mRpS25 PE=1 SV=1	acep:105618267/2e-50/probable 28S ribosomal protein S25, mitochondrial; K17404 small subunit ribosomal protein S25	7292989/9e-43/[J] KOG4079 Putative mitochondrial ribosomal protein mRpS25	A0A158NCD9/3e-49/A0A158NCD9_ATTCE Uncharacterized protein OS=Atta cephalotes OX=12957 GN=105618267 PE=4 SV=1	PF05047/3.2E-6/Mitochondrial ribosomal protein L51 / S25 / CI-B8 domain	1|IPR007741; Ribosomal protein/NADH dehydrogenase domain	cellular_component:GO:0005840//ribosome;
317_1	2.09024	NA	194680	AILDFMEPR	1	1	1	0.0052	15430	0	0	XP_011432404.1/0/PREDICTED: protein furry homolog-like isoform X5 [Crassostrea gigas]	O94915/0.0/FRYL_HUMAN Protein furry homolog-like OS=Homo sapiens OX=9606 GN=FRYL PE=1 SV=2	NA	Hs12957488/6e-153/[R] KOG1825 Fry-like conserved proteins	A0A210PPR8/0.0/A0A210PPR8_MIZYE Protein furry-like OS=Mizuhopecten yessoensis OX=6573 GN=KP79_PYT12158 PE=4 SV=1	PTHR12295:SF29/8.3E-297/--	2|IPR025481; Cell morphogenesis protein C-terminal|IPR029473; Cell morphogenesis central region	NA
813_1	2.43211	NA	240872	YNHIDQADVDK	1	1	2	0.0051	21466;21468	36041.2	279.389	XP_011416475.1/0/PREDICTED: uncharacterized protein LOC105320297 isoform X2 [Crassostrea gigas] &gt;XP_019919645.1 PREDICTED: uncharacterized protein LOC105320297 isoform X1 [Crassostrea gigas] &gt;XP_019919646.1 PREDICTED: uncharacterized protein LOC105320297 isoform X1 [Crassostrea gigas]	Q92598/0.0/HS105_HUMAN Heat shock protein 105 kDa OS=Homo sapiens OX=9606 GN=HSPH1 PE=1 SV=1	myi:110445781/0.0/heat shock 70 kDa protein 4-like; K09489 heat shock 70kDa protein 4	Hs5729879/0.0/[O] KOG0103 Molecular chaperones HSP105/HSP110/SSE1, HSP70 superfamily	K1Q6B8/0.0/K1Q6B8_CRAGI Linear gramicidin synthetase subunit D OS=Crassostrea gigas OX=29159 GN=CGI_10006353 PE=4 SV=1	PS01036/-/Heat shock hsp70 proteins family signature 3.	9|IPR000873; AMP-dependent synthetase/ligase|IPR002347; Short-chain dehydrogenase/reductase SDR|IPR009081; Phosphopantetheine binding ACP domain|IPR013120; Male sterility, NAD-binding|IPR013126; Heat shock protein 70 family|IPR018181; Heat shock protein 70, conserved site|IPR020806; Polyketide synthase, phosphopantetheine-binding domain|IPR020845; AMP-binding, conserved site|IPR025110; AMP-bindin…	biological_process:GO:0008152//metabolic process;molecular_function:GO:0003824//catalytic activity;GO:0031177//phosphopantetheine binding;molecular_function:GO:0031177//phosphopantetheine binding;GO:0016491//oxidoreductase activity;
74_1	2.0443	NA	62435.2	GLGAIQPGVNR	1	1	1	0.0199	15103	0	0	XP_022324801.1/1.59173e-172/dachshund homolog 1-like [Crassostrea virginica]	Q9UI36/1e-60/DACH1_HUMAN Dachshund homolog 1 OS=Homo sapiens OX=9606 GN=DACH1 PE=1 SV=4	NA	Hs18375609/7e-62/[K] KOG3915 Transcription regulator dachshund, contains SKI/SNO domain	K1PU52/1e-166/K1PU52_CRAGI Dachshund-like protein 1 OS=Crassostrea gigas OX=29159 GN=CGI_10023953 PE=4 SV=1	PTHR12577:SF6/1.1E-110/--	1|IPR003380; SKI/SNO/DAC domain	NA
334_1	2.09024	NA	85734.2	FTVAESCDR	1	1	1	0.0115	15175	12278.5	383.703	XP_011451930.1/0/PREDICTED: transducin-like enhancer protein 4 isoform X4 [Crassostrea gigas]	Q04724/0.0/TLE1_HUMAN Transducin-like enhancer protein 1 OS=Homo sapiens OX=9606 GN=TLE1 PE=1 SV=2	cqu:CpipJ_CPIJ009226/0.0/groucho protein; K04497 groucho	Hs21541824/0.0/[B] KOG0639 Transducin-like enhancer of split protein (contains WD40 repeats)	K1QHJ0/0.0/K1QHJ0_CRAGI Transducin-like enhancer protein 4 OS=Crassostrea gigas OX=29159 GN=CGI_10021617 PE=4 SV=1	PS50082/15.488/Trp-Asp (WD) repeats profile.	5|IPR001680; WD40 repeat|IPR005617; Groucho/TLE, N-terminal Q-rich domain|IPR009146; Groucho/transducin-like enhancer|IPR017986; WD40-repeat-containing domain|IPR019775; WD40 repeat, conserved site	biological_process:GO:0006355//regulation of transcription, DNA-templated;cellular_component:GO:0005634//nucleus;molecular_function:GO:0005515//protein binding;
803_1	4.33022	NA	203097	SLTQVEEDLSFIR	1	1	1	0.0073	26013	16776.2	151.137	XP_022292967.1/1.0086e-84/prefoldin subunit 3-like [Crassostrea virginica]	P61759/4e-59/PFD3_MOUSE Prefoldin subunit 3 OS=Mus musculus OX=10090 GN=Vbp1 PE=1 SV=2	gfr:102040199/5e-52/VBP1; phosphatidylinositol-binding clathrin assembly protein-like; K20044 phosphatidylinositol-binding clathrin assembly protein	Hs4507873/5e-59/[O] KOG3313 Molecular chaperone Prefoldin, subunit 3	A0A210R0R2/1e-77/A0A210R0R2_MIZYE Prefoldin subunit 3 OS=Mizuhopecten yessoensis OX=6573 GN=KP79_PYT07758 PE=3 SV=1	PF02996/1.1E-28/Prefoldin subunit	2|IPR004127; Prefoldin alpha-like|IPR016655; Prefoldin subunit 3	biological_process:GO:0006457//protein folding;cellular_component:GO:0016272//prefoldin complex;biological_process:GO:0006457//protein folding;cellular_component:GO:0016272//prefoldin complex;
398_1	2.59745	NA	110804	EQISELPEEVK	1	1	1	0.011	21052	99031.6	2303.06	XP_022292319.1/0/LOW QUALITY PROTEIN: serine/threonine-protein phosphatase 6 regulatory subunit 3-like [Crassostrea virginica]	Q5H9R7/0.0/PP6R3_HUMAN Serine/threonine-protein phosphatase 6 regulatory subunit 3 OS=Homo sapiens OX=9606 GN=PPP6R3 PE=1 SV=2	crg:105348289/0.0/serine/threonine-protein phosphatase 6 regulatory subunit 3 isoform X1; K15501 serine/threonine-protein phosphatase 6 regulatory subunit 3	Hs7662252/0.0/[D] KOG2073 SAP family cell cycle dependent phosphatase-associated protein	K1Q3L8/0.0/K1Q3L8_CRAGI Serine/threonine-protein phosphatase 6 regulatory subunit 3 OS=Crassostrea gigas OX=29159 GN=CGI_10016498 PE=4 SV=1	PTHR12634/2.2E-253/--	1|IPR007587; SIT4 phosphatase-associated protein family	NA
601_1	4.33022	NA	48969	QGQELSNDYK	1	1	1	0.023	17886	63097.2	4506.94	XP_022292518.1/2.06731e-31/wiskott-Aldrich syndrome protein family member 2-like [Crassostrea virginica] &gt;XP_022292520.1 wiskott-Aldrich syndrome protein family member 2-like [Crassostrea virginica] &gt;XP_022292521.1 wiskott-Aldrich syndrome protein family member 2-like [Crassostrea virginica]	Q8VHI6/4e-06/WASF3_MOUSE Wiskott-Aldrich syndrome protein family member 3 OS=Mus musculus OX=10090 GN=Wasf3 PE=1 SV=1	myi:110460262/5e-22/wiskott-Aldrich syndrome protein family member 2-like; K05748 WAS protein family, member 2	Hs13699803/2e-06/[Z] KOG1830 Wiskott Aldrich syndrome proteins	A0A0L8HKU8/2e-26/A0A0L8HKU8_OCTBM Uncharacterized protein OS=Octopus bimaculoides OX=37653 GN=OCBIM_22012421mg PE=4 SV=1	PR01217/4.3E-11/Proline rich extensin signature	2|IPR003124; WH2 domain|IPR028288; SCAR/WAVE family	biological_process:GO:0030036//actin cytoskeleton organization;cellular_component:GO:0005856//cytoskeleton;molecular_function:GO:0003779//actin binding;
511_1	4.33022	NA	23963.1	VINVLNDTVPLK	1	1	1	0.0561	21632	0	0	XP_015777645.1/1.07533e-34/PREDICTED: coiled-coil domain-containing protein 58-like [Acropora digitifera]	Q6PBK1/2e-32/CCD58_DANRE Coiled-coil domain-containing protein 58 OS=Danio rerio OX=7955 GN=ccdc58 PE=2 SV=2	bacu:103018416/2e-24/coiled-coil domain-containing protein 58-like; K16741 alstrom syndrome protein 1	Hs22043731/9e-30/[RD] KOG4613 Predicted component of DNA replication checkpoint response mechanism (S-M checkpoint)	A0A2C9L9Y0/4e-34/A0A2C9L9Y0_BIOGL Uncharacterized protein OS=Biomphalaria glabrata OX=6526 GN=106051775 PE=4 SV=1	PF09774/2.1E-9/Caffeine-induced death protein 2	1|IPR019171; Caffeine-induced death protein 2	NA
4_1	2.96913	NA	52721	LNELFAGIEK	1	1	1	0.021	16623	256321	9493.35	XP_021373932.1/0/WD repeat-containing protein 37-like isoform X1 [Mizuhopecten yessoensis] &gt;XP_021373933.1 WD repeat-containing protein 37-like isoform X2 [Mizuhopecten yessoensis] &gt;XP_021373934.1 WD repeat-containing protein 37-like isoform X1 [Mizuhopecten yessoensis]	Q8CBE3/8e-177/WDR37_MOUSE WD repeat-containing protein 37 OS=Mus musculus OX=10090 GN=Wdr37 PE=1 SV=1	egl:EGR_01572/1e-61/Serine/threonine-protein kinase ULK3; K21358 serine/threonine-protein kinase ULK3 [EC:2.7.11.1]	Hs7662430/4e-176/[S] KOG0300 WD40 repeat-containing protein	A0A210PVR2/0.0/A0A210PVR2_MIZYE WD repeat-containing protein 37 OS=Mizuhopecten yessoensis OX=6573 GN=KP79_PYT04457 PE=4 SV=1	PS50082/13.115/Trp-Asp (WD) repeats profile.	4|IPR001680; WD40 repeat|IPR017986; WD40-repeat-containing domain|IPR019775; WD40 repeat, conserved site|IPR020472; G-protein beta WD-40 repeat	molecular_function:GO:0005515//protein binding;
374_1	3.03078	NA	28595.9	YVEGEEESELR	1	1	1	0.0449	22126	0	0	XP_013379787.1/2.2129e-79/PREDICTED: vesicle transport protein USE1-like isoform X1 [Lingula anatina] &gt;XP_013379788.1 PREDICTED: vesicle transport protein USE1-like isoform X1 [Lingula anatina] &gt;XP_013379789.1 PREDICTED: vesicle transport protein USE1-like isoform X2 [Lingula anatina]	Q7ZTY7/5e-70/USE1_DANRE Vesicle transport protein USE1 OS=Danio rerio OX=7955 GN=use1 PE=2 SV=1	xma:102237685/3e-77/use1; vesicle transport protein USE1 isoform X1; K08507 unconventional SNARE in the endoplasmic reticulum protein 1	Hs8923936/3e-63/[S] KOG2678 Predicted membrane protein	A0A3B3Z5N4/1e-76/A0A3B3Z5N4_9TELE Uncharacterized protein OS=Poecilia mexicana OX=48701 PE=4 SV=1	PTHR13050/6.5E-58/--	1|IPR019150; Vesicle transport protein, Use1	cellular_component:GO:0016021//integral component of membrane;
82_1	2.1124	NA	50162.8	SVLDVQPDNVK	1	1	1	0.0243	18762	140856	5869	XP_022329628.1/9.15198e-166/peptidyl-prolyl cis-trans isomerase FKBP8-like [Crassostrea virginica]	Q14318/5e-74/FKBP8_HUMAN Peptidyl-prolyl cis-trans isomerase FKBP8 OS=Homo sapiens OX=9606 GN=FKBP8 PE=1 SV=2	crg:105325823/2e-159/peptidyl-prolyl cis-trans isomerase FKBP8 isoform X1; K09574 FK506-binding protein 8 [EC:5.2.1.8]	Hs17149851/5e-74/[O] KOG0543 FKBP-type peptidyl-prolyl cis-trans isomerase	K1PHA7/2e-136/K1PHA7_CRAGI Peptidylprolyl isomerase OS=Crassostrea gigas OX=29159 GN=CGI_10013873 PE=4 SV=1	PTHR10516:SF271/5.3E-88/--	4|IPR001179; FKBP-type peptidyl-prolyl cis-trans isomerase domain|IPR013026; Tetratricopeptide repeat-containing domain|IPR019734; Tetratricopeptide repeat|IPR023566; Peptidyl-prolyl cis-trans isomerase, FKBP-type	molecular_function:GO:0005515//protein binding;
322_1	2.12005	NA	24215.5	NAVTDLLEK	1	1	1	0.0427	13111	543263	54326.3	XP_019927821.1/4.19099e-111/PREDICTED: receptor expression-enhancing protein 5 isoform X1 [Crassostrea gigas]	Q60870/2e-70/REEP5_MOUSE Receptor expression-enhancing protein 5 OS=Mus musculus OX=10090 GN=Reep5 PE=1 SV=1	crg:105340399/6e-112/receptor expression-enhancing protein 5 isoform X1; K17279 receptor expression-enhancing protein 5/6	Hs19923919/6e-62/[U] KOG1725 Protein involved in membrane traffic (YOP1/TB2/DP1/HVA22 family)	A0A210QMT0/2e-105/A0A210QMT0_MIZYE Receptor expression-enhancing protein OS=Mizuhopecten yessoensis OX=6573 GN=KP79_PYT00927 PE=3 SV=1	PF03134/4.4E-29/TB2/DP1, HVA22 family	1|IPR004345; TB2/DP1/HVA22-related protein	NA
284_1	2.4688	NA	253453	IIYAEFPFYR	1	1	1	0.0045	21493	45429.3	372.371	XP_022331699.1/0/TWiK family of potassium channels protein 7-like [Crassostrea virginica]	Q6VV64/8e-31/KCNKI_MOUSE Potassium channel subfamily K member 18 OS=Mus musculus OX=10090 GN=Kcnk18 PE=1 SV=1	crg:105320894/0.0/TWiK family of potassium channels protein 7; K05323 potassium channel subfamily K, invertebrate	7304100/4e-55/[P] KOG1418 Tandem pore domain K+ channel	K1QMW8/0.0/K1QMW8_CRAGI Potassium channel subfamily K member 18 OS=Crassostrea gigas OX=29159 GN=CGI_10020854 PE=3 SV=1	PTHR11003/4.7E-125/--	2|IPR003280; Two pore domain potassium channel|IPR013099; Potassium channel domain	biological_process:GO:0071805//potassium ion transmembrane transport;cellular_component:GO:0016020//membrane;molecular_function:GO:0005267//potassium channel activity;cellular_component:GO:0016021//integral component of membrane;molecular_function:GO:0005267//potassium channel activity;
683_1	2.53616	NA	31958.3	LIIWVLK	1	1	1	0.0247	10498	0	0	XP_022286442.1/1.04337e-153/GDP-L-fucose synthase-like [Crassostrea virginica] &gt;XP_022286796.1 GDP-L-fucose synthase-like [Crassostrea virginica]	Q8K3X2/1e-144/FCL_CRIGR GDP-L-fucose synthase OS=Cricetulus griseus OX=10029 GN=TSTA3 PE=2 SV=1	crg:105331139/2e-154/GDP-L-fucose synthase; K02377 GDP-L-fucose synthase [EC:1.1.1.271]	Hs4507709/5e-144/[GO] KOG1431 GDP-L-fucose synthetase	A0A1S3JJV2/4e-153/A0A1S3JJV2_LINUN GDP-L-fucose synthase OS=Lingula unguis OX=7574 GN=LOC106173884 PE=3 SV=1	PF01370/2.7E-43/NAD dependent epimerase/dehydratase family	1|IPR001509; NAD-dependent epimerase/dehydratase	molecular_function:GO:0003824//catalytic activity;GO:0050662//coenzyme binding;biological_process:GO:0009226//nucleotide-sugar biosynthetic process;molecular_function:GO:0016491//oxidoreductase activity;GO:0050662//coenzyme binding;
6_2	2.96913	NA	28567.1	TFPVVIGLGGK;VFADLYK	1;0	1	2	0.0717	15305;15306;9866	424194	32630.3	XP_011455376.1/1.32321e-102/PREDICTED: chloride intracellular channel protein 2 [Crassostrea gigas] &gt;EKC30516.1 Chloride intracellular channel exc-4 [Crassostrea gigas]	O15247/8e-11/CLIC2_HUMAN Chloride intracellular channel protein 2 OS=Homo sapiens OX=9606 GN=CLIC2 PE=1 SV=3	crg:105347837/2e-103/chloride intracellular channel protein 2; K05022 chloride intracellular channel protein 2	7292935/7e-20/[P] KOG1422 Intracellular Cl- channel CLIC, contains GST domain	K1R973/2e-102/K1R973_CRAGI Chloride intracellular channel exc-4 OS=Crassostrea gigas OX=29159 GN=CGI_10017823 PE=4 SV=1	PTHR43920:SF5/5.5E-36/--	NA	NA
964_1	5.56693	NA	22830.5	AFYDLVR;EEGQAFANELK	1;1	2	2	0.0896	10465;19348	189323	12621.5	XP_021348159.1/8.11989e-91/ras-related protein R-Ras2-like [Mizuhopecten yessoensis] &gt;OWF52960.1 Ras-related protein R-Ras2 [Mizuhopecten yessoensis]	P62071/2e-83/RRAS2_MOUSE Ras-related protein R-Ras2 OS=Mus musculus OX=10090 GN=Rras2 PE=1 SV=1	myi:110447063/1e-91/ras-related protein R-Ras2-like; K07830 Ras-related protein R-Ras2	Hs21361416/8e-84/[R] KOG0395 Ras-related GTPase	A0A210QW24/1e-90/A0A210QW24_MIZYE Ras-related protein R-Ras2 OS=Mizuhopecten yessoensis OX=6573 GN=KP79_PYT06704 PE=4 SV=1	SM00173/1.4E-103/--	2|IPR001806; Small GTPase superfamily|IPR020849; Small GTPase superfamily, Ras-type	biological_process:GO:0007165//signal transduction;cellular_component:GO:0016020//membrane;molecular_function:GO:0003924//GTPase activity;GO:0005525//GTP binding;biological_process:GO:0007165//signal transduction;cellular_component:GO:0016020//membrane;molecular_function:GO:0005525//GTP binding;GO:0003924//GTPase activity;
384_1	2.43211	NA	99988.9	GISSGVEGPIR	1	1	1	0.0124	14852	201710	3418.82	XP_022333075.1/0/uncharacterized protein LOC111130362 isoform X1 [Crassostrea virginica]	Q9VL06/7e-10/UFD4_DROME E3 ubiquitin-protein ligase Ufd4 OS=Drosophila melanogaster OX=7227 GN=Ufd4 PE=2 SV=1	api:100163275/4e-12/E3 ubiquitin-protein ligase HECTD1; K12231 E3 ubiquitin-protein ligase HECTD1 [EC:2.3.2.26]	Hs20486176/4e-10/[S] KOG1426 FOG: RCC1 domain	K1RW92/0.0/K1RW92_CRAGI E3 ubiquitin-protein ligase MIB2 OS=Crassostrea gigas OX=29159 GN=CGI_10020677 PE=4 SV=1	PF13519/1.4E-11/von Willebrand factor type A domain	3|IPR002035; von Willebrand factor, type A|IPR004170; WWE domain|IPR010606; Mib-herc2	biological_process:GO:0016567//protein ubiquitination;molecular_function:GO:0004842//ubiquitin-protein transferase activity;GO:0046872//metal ion binding;
748_1	4.33022	NA	41223.5	TQEFLQPNPASR	1	1	1	0.0331	23260	138347	5533.89	XP_022329960.1/0/endophilin-A3-like isoform X2 [Crassostrea virginica]	Q8AXV0/2e-131/SH3G1_CHICK Endophilin-A2 OS=Gallus gallus OX=9031 GN=SH3GL1 PE=1 SV=1	crg:105344087/0.0/endophilin-A3 isoform X1; K11247 endophilin-A	Hs4506929/4e-129/[IT] KOG1118 Lysophosphatidic acid acyltransferase endophilin/SH3GL, involved in synaptic vesicle formation	K1PBJ2/0.0/K1PBJ2_CRAGI Endophilin-A2 OS=Crassostrea gigas OX=29159 GN=CGI_10004477 PE=4 SV=1	PS50002/27.563/Src homology 3 (SH3) domain profile.	3|IPR001452; SH3 domain|IPR004148; BAR domain|IPR028501; Endophilin-A	biological_process:GO:0006897//endocytosis;cellular_component:GO:0005737//cytoplasm;molecular_function:GO:0005515//protein binding;biological_process:GO:0006897//endocytosis;cellular_component:GO:0005737//cytoplasm;
234_1	4.33022	NA	154288	YGTLNEFAFFDK	1	1	1	0.0089	24534	0	0	XP_011437300.1/0/PREDICTED: paired amphipathic helix protein Sin3a isoform X4 [Crassostrea gigas]	Q60520/0.0/SIN3A_MOUSE Paired amphipathic helix protein Sin3a OS=Mus musculus OX=10090 GN=Sin3a PE=1 SV=3	crg:105335199/0.0/paired amphipathic helix protein Sin3a isoform X1; K11644 paired amphipathic helix protein Sin3a	Hs22056376/0.0/[B] KOG4204 Histone deacetylase complex, SIN3 component	K1QAV9/0.0/K1QAV9_CRAGI Paired amphipathic helix protein Sin3b OS=Crassostrea gigas OX=29159 GN=CGI_10011723 PE=4 SV=1	PS51477/19.696/PAH domain profile.	4|IPR003822; Paired amphipathic helix|IPR013194; Histone deacetylase interacting domain|IPR031693; Sin3, C-terminal|IPR037969; Paired amphipathic helix protein Sin3a	biological_process:GO:0006355//regulation of transcription, DNA-templated;cellular_component:GO:0016580//Sin3 complex;molecular_function:GO:0003714//transcription corepressor activity;
108_1	4.55524	NA	28641.8	HYGGLTGLNK;VLPYWHDVIVPTIK	1;1	2	2	0.096	14480;27382	182364	10727.3	XP_021376151.1/1.96215e-149/probable phosphoglycerate mutase [Mizuhopecten yessoensis] &gt;OWF55094.1 phosphoglycerate mutase [Mizuhopecten yessoensis]	Q54NE6/9e-122/PGAM_DICDI Probable phosphoglycerate mutase OS=Dictyostelium discoideum OX=44689 GN=gpmA PE=1 SV=1	myi:110464962/3e-150/probable phosphoglycerate mutase; K01834 2,3-bisphosphoglycerate-dependent phosphoglycerate mutase [EC:5.4.2.11]	Hs20541619/9e-115/[G] KOG0235 Phosphoglycerate mutase	A0A210R2C8/4e-149/A0A210R2C8_MIZYE Phosphoglycerate mutase OS=Mizuhopecten yessoensis OX=6573 GN=KP79_PYT17077 PE=3 SV=1	PTHR11931:SF8/3.0E-113/--	3|IPR001345; Phosphoglycerate/bisphosphoglycerate mutase, active site|IPR005952; Phosphoglycerate mutase 1|IPR013078; Histidine phosphatase superfamily, clade-1	biological_process:GO:0006096//glycolytic process;GO:0008152//metabolic process;molecular_function:GO:0003824//catalytic activity;GO:0004619//phosphoglycerate mutase activity;GO:0016868//intramolecular transferase activity, phosphotransferases;biological_process:GO:0006096//glycolytic process;molecular_function:GO:0004619//phosphoglycerate mutase activity;GO:0004082//bisphosphoglycerate mutase ac…
645_1	2.12005	NA	44926.6	ATKPESLNR	1	1	1	0.023	13406	30305.1	2525.43	XP_011446351.1/4.43338e-166/PREDICTED: cholecystokinin receptor [Crassostrea gigas]	Q8IN35/3e-10/SIFAR_DROME Neuropeptide SIFamide receptor OS=Drosophila melanogaster OX=7227 GN=SIFaR PE=2 SV=2	myi:110450339/6e-55/gastrin/cholecystokinin type B receptor-like; K04194 cholecystokinin A receptor	Hs4505557/2e-10/[TV] LSE0316 H G-protein-coupled receptor	K1Q725/5e-145/K1Q725_CRAGI 5-hydroxytryptamine receptor 2B OS=Crassostrea gigas OX=29159 GN=CGI_10013005 PE=4 SV=1	PS50262/23.521/G-protein coupled receptors family 1 profile.	2|IPR000276; G protein-coupled receptor, rhodopsin-like|IPR017452; GPCR, rhodopsin-like, 7TM	biological_process:GO:0007186//G-protein coupled receptor signaling pathway;cellular_component:GO:0016021//integral component of membrane;molecular_function:GO:0004930//G-protein coupled receptor activity;
60_1	2.09024	NA	697714	SAVMCAFSFVNTVIDKPDETCR	1	1	1	0.0035	31796	0	0	XP_021369796.1/0/uncharacterized protein LOC110460910 isoform X1 [Mizuhopecten yessoensis]	Q8N2E2/5e-29/VWDE_HUMAN von Willebrand factor D and EGF domain-containing protein OS=Homo sapiens OX=9606 GN=VWDE PE=2 SV=4	myi:110450424/1e-145/uncharacterized protein LOC110450424 isoform X1; K17341 hemicentin	Hs20539391/1e-28/[T] KOG1217 Fibrillins and related proteins containing Ca2+-binding EGF-like domains	A0A210PRZ6/2e-177/A0A210PRZ6_MIZYE Hemicentin-1 OS=Mizuhopecten yessoensis OX=6573 GN=KP79_PYT20735 PE=4 SV=1	SM00217/5.9E-4/--	9|IPR000922; D-galactoside/L-rhamnose binding SUEL lectin domain|IPR001846; von Willebrand factor, type D domain|IPR002035; von Willebrand factor, type A|IPR006150; Cysteine-rich repeat|IPR008197; WAP-type 'four-disulfide core' domain|IPR013032; EGF-like, conserved site|IPR018363; CD59 antigen, conserved site|IPR028150; Lustrin, cysteine-rich repeated|IPR035234; IgGFc-binding protein, N-terminal	cellular_component:GO:0005576//extracellular region;molecular_function:GO:0030246//carbohydrate binding;GO:0030414//peptidase inhibitor activity;
362_1	2.12005	NA	129581	DAAIFSELNR	1	1	1	0.0088	16656	70022.4	1094.1	XP_021351512.1/0/gamma-tubulin complex component 3-like [Mizuhopecten yessoensis]	O73787/0.0/GCP3_XENLA Gamma-tubulin complex component 3 homolog OS=Xenopus laevis OX=8355 GN=tubgcp3 PE=1 SV=1	myi:110449159/0.0/gamma-tubulin complex component 3-like; K16570 gamma-tubulin complex component 3	Hs5453660/0.0/[Z] KOG2000 Gamma-tubulin complex, DGRIP91/SPC98 component	K1QVU3/0.0/K1QVU3_CRAGI Gamma-tubulin complex component OS=Crassostrea gigas OX=29159 GN=CGI_10023519 PE=3 SV=1	PTHR19302:SF14/4.3E-199/--	1|IPR007259; Gamma-tubulin complex component protein	biological_process:GO:0000226//microtubule cytoskeleton organization;GO:0007020//microtubule nucleation;cellular_component:GO:0000922//spindle pole;GO:0005815//microtubule organizing center;molecular_function:GO:0043015//gamma-tubulin binding;biological_process:GO:0007020//microtubule nucleation;cellular_component:GO:0000922//spindle pole;GO:0005815//microtubule organizing center;GO:0005874//micr…
411_1	2.55608	NA	49063.8	TFIQAQADLVK	1	1	1	0.0253	19309	13778.2	529.932	XP_011429335.1/0/PREDICTED: ferrochelatase, mitochondrial [Crassostrea gigas]	O57478/0.0/HEMH_XENLA Ferrochelatase, mitochondrial OS=Xenopus laevis OX=8355 GN=fech PE=1 SV=1	crg:105329689/0.0/ferrochelatase, mitochondrial; K01772 protoporphyrin/coproporphyrin ferrochelatase [EC:4.99.1.1 4.99.1.9]	Hs4557593/0.0/[H] KOG1321 Protoheme ferro-lyase (ferrochelatase)	K1Q105/0.0/K1Q105_CRAGI Ferrochelatase OS=Crassostrea gigas OX=29159 GN=CGI_10012403 PE=3 SV=1	PTHR11108:SF1/3.4E-151/--	2|IPR001015; Ferrochelatase|IPR019772; Ferrochelatase, active site	biological_process:GO:0006783//heme biosynthetic process;molecular_function:GO:0004325//ferrochelatase activity;
164_1	8.66045	NA	107810	GVPPPPTASEPTR;LLEESDSHLK	1;1	2	2	0.0242	21181;17598	116978	2339.55	XP_011419799.1/0/PREDICTED: transcription elongation regulator 1 isoform X2 [Crassostrea gigas]	O14776/0.0/TCRG1_HUMAN Transcription elongation regulator 1 OS=Homo sapiens OX=9606 GN=TCERG1 PE=1 SV=2	crg:105322652/0.0/transcription elongation regulator 1 isoform X1; K12824 transcription elongation regulator 1	Hs21327715/0.0/[K] KOG0155 Transcription factor CA150	K1PX56/0.0/K1PX56_CRAGI Transcription elongation regulator 1 OS=Crassostrea gigas OX=29159 GN=CGI_10009015 PE=4 SV=1	PS50020/10.699/WW/rsp5/WWP domain profile.	2|IPR001202; WW domain|IPR002713; FF domain	molecular_function:GO:0005515//protein binding;
524_1	2.15241	NA	30330.3	EQGIGDILR	1	1	1	0.0319	13063	29767.7	2126.27	XP_011430093.2/6.86523e-155/PREDICTED: purine nucleoside phosphorylase-like isoform X2 [Crassostrea gigas]	P00491/2e-106/PNPH_HUMAN Purine nucleoside phosphorylase OS=Homo sapiens OX=9606 GN=PNP PE=1 SV=2	crg:105330190/3e-154/purine nucleoside phosphorylase-like isoform X1; K03783 purine-nucleoside phosphorylase [EC:2.4.2.1]	Hs4557801/1e-107/[F] KOG3984 Purine nucleoside phosphorylase	K1R4H7/6e-150/K1R4H7_CRAGI Purine nucleoside phosphorylase OS=Crassostrea gigas OX=29159 GN=CGI_10014090 PE=4 SV=1	PF01048/8.0E-48/Phosphorylase superfamily	2|IPR000845; Nucleoside phosphorylase domain|IPR011268; Purine nucleoside phosphorylase	biological_process:GO:0006139//nucleobase-containing compound metabolic process;GO:0009116//nucleoside metabolic process;molecular_function:GO:0003824//catalytic activity;GO:0004731//purine-nucleoside phosphorylase activity;biological_process:GO:0009116//nucleoside metabolic process;molecular_function:GO:0004731//purine-nucleoside phosphorylase activity;
874_1	2.96913	NA	197451	ESIFENLDTGEK	1	1	1	0.0067	23090	212148	1860.95	XP_022295353.1/0/serine/threonine-protein kinase Nek9-like isoform X4 [Crassostrea virginica]	Q9Y6N5/4e-147/SQOR_HUMAN Sulfide:quinone oxidoreductase, mitochondrial OS=Homo sapiens OX=9606 GN=SQOR PE=1 SV=1	zne:110839455/0.0/serine/threonine-protein kinase Nek8-like isoform X1; K20877 NIMA (never in mitosis gene a)-related kinase 8 [EC:2.7.11.1]	Hs10864011/2e-147/[C] KOG3851 Sulfide:quinone oxidoreductase/flavo-binding protein	K1QS00/0.0/K1QS00_CRAGI Serine/threonine-protein kinase Nek8 OS=Crassostrea gigas OX=29159 GN=CGI_10021030 PE=4 SV=1	PS50012/14.122/Regulator of chromosome condensation (RCC1) repeat profile.	5|IPR000408; Regulator of chromosome condensation, RCC1|IPR000719; Protein kinase domain|IPR008271; Serine/threonine-protein kinase, active site|IPR017441; Protein kinase, ATP binding site|IPR023753; FAD/NAD(P)-binding domain	biological_process:GO:0006468//protein phosphorylation;GO:0055114//oxidation-reduction process;molecular_function:GO:0004672//protein kinase activity;GO:0005524//ATP binding;GO:0016491//oxidoreductase activity;
658_1	4.33022	NA	55826.1	LFPLVPLMPGADK	1	1	1	0.0261	23477	15200.4	584.633	XP_022287546.1/1.60584e-96/pseudouridine-5&apos;-phosphatase-like [Crassostrea virginica]	Q08623/6e-70/HDHD1_HUMAN Pseudouridine-5'-phosphatase OS=Homo sapiens OX=9606 GN=PUDP PE=1 SV=3	crg:105347971/1e-91/pseudouridine-5'-phosphatase; K17623 pseudouridine 5'-phosphatase [EC:3.1.3.96]	Hs6912346/1e-71/[R] KOG2914 Predicted haloacid-halidohydrolase and related hydrolases	K1RE08/1e-90/K1RE08_CRAGI Haloacid dehalogenase-like hydrolase domain-containing protein 1A OS=Crassostrea gigas OX=29159 GN=CGI_10027954 PE=4 SV=1	PTHR18901/3.2E-88/--	NA	biological_process:GO:0008152//metabolic process;molecular_function:GO:0016787//hydrolase activity;
935_1	2.1124	NA	31175.8	LANVEVQGSK	1	1	1	0.0362	14074	93197.7	4905.14	XP_022306728.1/1.32328e-101/CBP80/20-dependent translation initiation factor-like [Crassostrea virginica]	O43310/2e-39/CTIF_HUMAN CBP80/20-dependent translation initiation factor OS=Homo sapiens OX=9606 GN=CTIF PE=1 SV=1	ccar:109095876/2e-10/microtubule-associated serine/threonine-protein kinase 1-like; K08789 microtubule-associated serine/threonine kinase [EC:2.7.11.1]	Hs7662112_2/1e-41/[J] KOG3942 MIF4G domain-containing protein	K1PB36/8e-100/K1PB36_CRAGI CBP80/20-dependent translation initiation factor OS=Crassostrea gigas OX=29159 GN=CGI_10011720 PE=4 SV=1	PTHR23254/7.1E-56/--	1|IPR003890; MIF4G-like, type 3	molecular_function:GO:0003723//RNA binding;GO:0005515//protein binding;molecular_function:GO:0003743//translation initiation factor activity;
121_1	2.96913	NA	13409.8	FNEIAAQYSEDK	1	1	1	0.093	23826	71511	7945.66	XP_022335692.1/1.13659e-66/peptidyl-prolyl cis-trans isomerase NIMA-interacting 4-like [Crassostrea virginica]	Q503Y7/5e-61/PIN4_DANRE Peptidyl-prolyl cis-trans isomerase NIMA-interacting 4 OS=Danio rerio OX=7955 GN=pin4 PE=2 SV=1	mdl:103575249/2e-66/peptidyl-prolyl cis-trans isomerase NIMA-interacting 4; K09579 peptidyl-prolyl cis-trans isomerase NIMA-interacting 4 [EC:5.2.1.8]	CE22150/3e-59/[O] KOG3258 Parvulin-like peptidyl-prolyl cis-trans isomerase	A0A026WIL3/5e-65/A0A026WIL3_OOCBI Peptidyl-prolyl cis-trans isomerase OS=Ooceraea biroi OX=2015173 GN=DMN91_011852 PE=4 SV=1	PTHR10657:SF25/5.1E-54/--	1|IPR000297; Peptidyl-prolyl cis-trans isomerase, PpiC-type	molecular_function:GO:0003755//peptidyl-prolyl cis-trans isomerase activity;
314_1	8.59503	NA	70086.1	GLPSADFFAAPR;NQLGPVFGNK;VSLDTDGK	1;1;1	3	3	0.0485	19723;14904;9355	1.87703e+06	53629.5	XP_022343342.1/3.2154e-180/vesicular integral-membrane protein VIP36-like [Crassostrea virginica]	P49256/5e-105/LMAN2_CANLF Vesicular integral-membrane protein VIP36 OS=Canis lupus familiaris OX=9615 GN=LMAN2 PE=1 SV=1	crg:105331081/1e-180/vesicular integral-membrane protein VIP36; K10082 lectin, mannose-binding 2	7301116/2e-119/[U] KOG3839 Lectin VIP36, involved in the transport of glycoproteins carrying high mannose-type glycans	A0A210PPM8/2e-164/A0A210PPM8_MIZYE Vesicular integral-membrane protein VIP36 OS=Mizuhopecten yessoensis OX=6573 GN=KP79_PYT17766 PE=4 SV=1	PTHR12223/7.1E-118/--	1|IPR005052; Legume-like lectin	cellular_component:GO:0016020//membrane;
245_1	2.14231	NA	163092	SLEDVVR	1	1	1	0.0051	9035	86340.1	1065.93	EKC34993.1/0/Eukaryotic translation initiation factor 3 subunit A [Crassostrea gigas]	A2VD00/0.0/EIF3A_XENLA Eukaryotic translation initiation factor 3 subunit A OS=Xenopus laevis OX=8355 GN=eif3a PE=2 SV=1	crg:105339951/0.0/eukaryotic translation initiation factor 3 subunit A; K03254 translation initiation factor 3 subunit A	Hs4503509/0.0/[J] KOG2072 Translation initiation factor 3, subunit a (eIF-3a)	K1QMB9/0.0/K1QMB9_CRAGI Eukaryotic translation initiation factor 3 subunit A OS=Crassostrea gigas OX=29159 GN=CGI_10023612 PE=3 SV=1	PF01399/4.0E-14/PCI domain	1|IPR000717; Proteasome component (PCI) domain	NA
55_1	2.0443	NA	367875	HILIVTDK	1	1	1	0.0024	11674	0	0	OWF39658.1/0/Vacuolar protein sorting-associated protein 13A [Mizuhopecten yessoensis]	Q5H8C4/0.0/VP13A_MOUSE Vacuolar protein sorting-associated protein 13A OS=Mus musculus OX=10090 GN=Vps13a PE=1 SV=1	myi:110464761/0.0/vacuolar protein sorting-associated protein 13A-like isoform X1; K19525 vacuolar protein sorting-associated protein 13A/C	Hs15619010/0.0/[U] KOG1809 Vacuolar protein sorting-associated protein	A0A210PT48/0.0/A0A210PT48_MIZYE Vacuolar protein sorting-associated protein 13A OS=Mizuhopecten yessoensis OX=6573 GN=KP79_PYT23276 PE=4 SV=1	PF06650/4.4E-5/SHR-binding domain of vacuolar-sorting associated protein 13	7|IPR009543; Vacuolar protein sorting-associated protein 13, SHR-binding domain|IPR015412; Autophagy-related, C-terminal|IPR026847; Vacuolar protein sorting-associated protein 13|IPR026854; Vacuolar protein sorting-associated protein 13, N-terminal domain|IPR031642; VPS13, repeated coiled region|IPR031645; Vacuolar protein sorting-associated protein 13, C-terminal|IPR031646; Vacuolar protein sort…	NA
130_1	2.8598	NA	123181	ETAVYLTSLSNK	1	1	1	0.011	21646	0	0	XP_022334666.1/0/ribosome-binding protein 1-like isoform X2 [Crassostrea virginica]	Q99PL5/3e-34/RRBP1_MOUSE Ribosome-binding protein 1 OS=Mus musculus OX=10090 GN=Rrbp1 PE=1 SV=2	crg:105329338/0.0/ribosome-binding protein 1 isoform X1; K14000 ribosome-binding protein 1	Hs4759056/3e-36/[J] LSE3605 H Ribosome binding protein	K1PHS4/0.0/K1PHS4_CRAGI Ribosome-binding protein 1 OS=Crassostrea gigas OX=29159 GN=CGI_10004563 PE=4 SV=1	PTHR18939/1.2E-73/--	NA	NA
839_1	2.69833	NA	55429	WTNTLLGTPVK	1	1	1	0.0227	19200	44389.7	1345.14	XP_011446412.1/0/PREDICTED: BRO1 domain-containing protein BROX-like [Crassostrea gigas]	A3KQV2/4e-145/BROX_DANRE BRO1 domain-containing protein BROX OS=Danio rerio OX=7955 GN=brox PE=2 SV=1	sanh:107668297/5e-13/tyrosine-protein phosphatase non-receptor type 23-like isoform X1; K18040 tyrosine-protein phosphatase non-receptor type 23 [EC:3.1.3.48]	CE07761/2e-105/[R] KOG2220 Predicted signal transduction protein	A0A210QP31/0.0/A0A210QP31_MIZYE BRO1 domain-containing protein BROX OS=Mizuhopecten yessoensis OX=6573 GN=KP79_PYT10697 PE=4 SV=1	SM01041/2.0E-69/--	2|IPR004328; BRO1 domain|IPR038898; BRO1 domain-containing protein BROX	NA
49_1	5.28627	NA	20921.3	GQHFSMGIQVLDR;YGGPGGEVQLPYK	1;1	2	3	0.1376	25191;25192;22721	1.03339e+06	129174	XP_013073313.1/5.97635e-25/PREDICTED: galectin-4-like [Biomphalaria glabrata]	Q8K419/3e-22/LEG4_MOUSE Galectin-4 OS=Mus musculus OX=10090 GN=Lgals4 PE=1 SV=2	amex:103047365/4e-24/galectin-9-like isoform X2; K10093 galectin-9	Hs5453712/7e-21/[W] KOG3587 Galectin, galactose-binding lectin	A0A194AMM3/2e-133/A0A194AMM3_PINFU Galectin OS=Pinctada fucata OX=50426 PE=4 SV=1	SM00908/7.1E-41/--	1|IPR001079; Galectin, carbohydrate recognition domain	molecular_function:GO:0030246//carbohydrate binding;molecular_function:GO:0030246//carbohydrate binding;
171_1	2.53616	NA	114145	LEYVDDSGR	1	1	1	0.0091	14289	39662	843.872	XP_022334613.1/5.11534e-157/LOW QUALITY PROTEIN: U4/U6.U5 tri-snRNP-associated protein 1-like [Crassostrea virginica]	O43290/1e-84/SNUT1_HUMAN U4/U6.U5 tri-snRNP-associated protein 1 OS=Homo sapiens OX=9606 GN=SART1 PE=1 SV=1	crg:105322157/3e-153/U4/U6.U5 tri-snRNP-associated protein 1; K11984 U4/U6.U5 tri-snRNP-associated protein 1	Hs10863889/4e-85/[A] KOG2217 U4/U6.U5 snRNP associated protein	K1QY30/4e-152/K1QY30_CRAGI U4/U6.U5 tri-snRNP-associated protein 1 OS=Crassostrea gigas OX=29159 GN=CGI_10021218 PE=4 SV=1	PTHR14152/1.7E-194/--	1|IPR005011; SNU66/SART1 family	biological_process:GO:0000398//mRNA splicing, via spliceosome;biological_process:GO:0000398//mRNA splicing, via spliceosome;
816_1	6.88631	NA	61045.4	IGPEPTTDR;YLLEQDFPGIR	1;1	2	2	0.0374	12674;22379	729060	20251.7	XP_011448866.1/0/PREDICTED: EH domain-containing protein 3 [Crassostrea gigas] &gt;EKC20575.1 EH domain-containing protein 1 [Crassostrea gigas]	Q641Z6/0.0/EHD1_RAT EH domain-containing protein 1 OS=Rattus norvegicus OX=10116 GN=Ehd1 PE=1 SV=1	crg:105343266/0.0/EH domain-containing protein 3; K12483 EH domain-containing protein 1	CE28509/0.0/[TU] KOG1954 Endocytosis/signaling protein EHD1	K1PWB9/0.0/K1PWB9_CRAGI EH domain-containing protein 1 OS=Crassostrea gigas OX=29159 GN=CGI_10005813 PE=3 SV=1	SM00027/1.3E-36/--	6|IPR000261; EH domain|IPR002048; EF-hand domain|IPR018247; EF-Hand 1, calcium-binding site|IPR022812; Dynamin superfamily|IPR030381; Dynamin-type guanine nucleotide-binding (G) domain|IPR031692; EH domain-containing protein, N-terminal	molecular_function:GO:0005509//calcium ion binding;GO:0005515//protein binding;GO:0005525//GTP binding;molecular_function:GO:0005509//calcium ion binding;GO:0005525//GTP binding;
965_1	2.40541	NA	196861	AQLMNQAK	1	1	1	0.0046	10944	249465	2309.86	XP_011442695.1/0/PREDICTED: codanin-1 [Crassostrea gigas]	Q8CC12/1e-142/CDAN1_MOUSE Codanin-1 OS=Mus musculus OX=10090 GN=Cdan1 PE=1 SV=2	crg:105339012/0.0/codanin-1; K19531 codanin-1	NA	A0A210QBN6/0.0/A0A210QBN6_MIZYE Codanin-1 OS=Mizuhopecten yessoensis OX=6573 GN=KP79_PYT10294 PE=4 SV=1	PF15296/1.4E-32/Codanin-1 C-terminus	1|IPR028171; Codanin-1, C-terminal domain	NA
338_1	2.59745	NA	38590.6	VSWQDLK	1	1	1	0.0209	10298	55610	2780.5	XP_019629029.1/2.2282e-71/PREDICTED: serine/arginine-rich splicing factor 4-like isoform X4 [Branchiostoma belcheri]	Q8VE97/6e-64/SRSF4_MOUSE Serine/arginine-rich splicing factor 4 OS=Mus musculus OX=10090 GN=Srsf4 PE=2 SV=1	sko:100366898/2e-68/serine/arginine-rich splicing factor 4-like; K12893 splicing factor, arginine/serine-rich 4/5/6	Hs21361282/5e-64/[A] KOG0106 Alternative splicing factor SRp55/B52/SRp75 (RRM superfamily)	A0A3B3QZM1/7e-71/A0A3B3QZM1_9TELE Serine and arginine rich splicing factor 6a OS=Paramormyrops kingsleyae OX=1676925 PE=4 SV=1	PS50102/9.985/Eukaryotic RNA Recognition Motif (RRM) profile.	1|IPR000504; RNA recognition motif domain	molecular_function:GO:0003676//nucleic acid binding;
394_1	2.30111	NA	72982.5	TVITIAHR	1	1	1	0.012	11067	0	0	XP_021378498.1/0/ATP-binding cassette sub-family B member 10, mitochondrial-like [Mizuhopecten yessoensis]	Q9NRK6/0.0/ABCBA_HUMAN ATP-binding cassette sub-family B member 10, mitochondrial OS=Homo sapiens OX=9606 GN=ABCB10 PE=1 SV=2	myi:110466376/0.0/ATP-binding cassette sub-family B member 10, mitochondrial-like; K05657 ATP-binding cassette, subfamily B (MDR/TAP), member 10	Hs9961244/0.0/[U] KOG0058 Peptide exporter, ABC superfamily	A0A210PPH1/0.0/A0A210PPH1_MIZYE ATP-binding cassette sub-family B member 10, mitochondrial OS=Mizuhopecten yessoensis OX=6573 GN=KP79_PYT10743 PE=4 SV=1	PS00211/-/ABC transporters family signature.	5|IPR003439; ABC transporter-like|IPR003593; AAA+ ATPase domain|IPR011527; ABC transporter type 1, transmembrane domain|IPR017871; ABC transporter, conserved site|IPR030260; ATP-binding cassette subfamily B member 10-like	biological_process:GO:0055085//transmembrane transport;cellular_component:GO:0016021//integral component of membrane;molecular_function:GO:0005524//ATP binding;GO:0016887//ATPase activity;GO:0042626//ATPase activity, coupled to transmembrane movement of substances;cellular_component:GO:0005743//mitochondrial inner membrane;GO:0016021//integral component of membrane;molecular_function:GO:0005524//…
696_1	2.69833	NA	46693	IEFPIPDR	1	1	1	0.0194	12699	344454	15657	XP_011441086.1/0/PREDICTED: 26S protease regulatory subunit 6B isoform X2 [Crassostrea gigas]	Q4R7L3/0.0/PRS6B_MACFA 26S proteasome regulatory subunit 6B OS=Macaca fascicularis OX=9541 GN=PSMC4 PE=2 SV=1	crg:105337862/0.0/26S protease regulatory subunit 6B isoform X1; K03063 26S proteasome regulatory subunit T3	7292602/0.0/[O] KOG0727 26S proteasome regulatory complex, ATPase RPT3	K1QSB2/0.0/K1QSB2_CRAGI 26S protease regulatory subunit 6B OS=Crassostrea gigas OX=29159 GN=CGI_10019584 PE=3 SV=1	PTHR23073:SF8/2.3E-239/--	4|IPR003593; AAA+ ATPase domain|IPR003959; ATPase, AAA-type, core|IPR003960; ATPase, AAA-type, conserved site|IPR035256; 26S Proteasome regulatory subunit 6B	molecular_function:GO:0005524//ATP binding;GO:0036402//proteasome-activating ATPase activity;biological_process:GO:0030163//protein catabolic process;cellular_component:GO:0005737//cytoplasm;molecular_function:GO:0008233//peptidase activity;GO:0005524//ATP binding;GO:0036402//proteasome-activating ATPase activity;
830_1	4.33022	NA	38008.4	SELDAQAHAAR	1	1	1	0.0324	17554	0	0	XP_022334807.1/4.14338e-176/UBX domain-containing protein 1-like [Crassostrea virginica]	Q6NXA9/5e-76/UBXN1_DANRE UBX domain-containing protein 1 OS=Danio rerio OX=7955 GN=ubxn1 PE=2 SV=1	dpte:113797447/2e-19/SNW domain-containing protein 1-like; K06063 SNW domain-containing protein 1	7295177/3e-28/[R] KOG2507 Ubiquitin regulatory protein UBXD2, contains UAS and UBX domains	K1P9B0/1e-154/K1P9B0_CRAGI UBX domain-containing protein 1-A OS=Crassostrea gigas OX=29159 GN=CGI_10006113 PE=4 SV=1	SM00166/1.4E-23/--	3|IPR001012; UBX domain|IPR013087; Zinc finger C2H2-type|IPR015940; Ubiquitin-associated domain	molecular_function:GO:0003676//nucleic acid binding;GO:0005515//protein binding;molecular_function:GO:0003676//nucleic acid binding;
898_1	4.33022	NA	33238.9	DYGTVFTEHVASPTVEK	1	1	1	0.058	28697	1.15618e+06	55056	XP_022289372.1/6.06709e-57/putative 2&apos;-deoxynucleoside 5&apos;-phosphate N-hydrolase 1 [Crassostrea virginica]	Q4S2L4/1e-47/DNPH1_TETNG 2'-deoxynucleoside 5'-phosphate N-hydrolase 1 OS=Tetraodon nigroviridis OX=99883 GN=dnph1 PE=3 SV=2	myi:110451434/1e-53/2'-deoxynucleoside 5'-phosphate N-hydrolase 1-like isoform X1; K22928 2'-deoxynucleoside 5'-phosphate N-hydrolase [EC:3.2.2.-]	NA	A0A3Q1JIA6/1e-48/A0A3Q1JIA6_ANATE 2'-deoxynucleoside 5'-phosphate N-hydrolase 1 OS=Anabas testudineus OX=64144 GN=DNPH1 PE=3 SV=1	PTHR15364/8.6E-38/--	2|IPR006612; THAP-type zinc finger|IPR007710; Nucleoside 2-deoxyribosyltransferase	molecular_function:GO:0003676//nucleic acid binding;biological_process:GO:0009159//deoxyribonucleoside monophosphate catabolic process;GO:0009116//nucleoside metabolic process;GO:0009117//nucleotide metabolic process;cellular_component:GO:0005634//nucleus;GO:0005737//cytoplasm;molecular_function:GO:0070694//deoxyribonucleoside 5'-monophosphate N-glycosidase activity;GO:0050144//nucleoside deoxyri…
953_1	2.53616	NA	23563.2	YLNFIPNAPDPSR	1	1	1	0.0628	25492	425732	53216.5	XP_007561920.1/2.0723e-34/PREDICTED: ATP synthase subunit s, mitochondrial [Poecilia formosa]	P22027/7e-31/ATP5S_BOVIN ATP synthase subunit s, mitochondrial OS=Bos taurus OX=9913 GN=DMAC2L PE=1 SV=2	sko:100376658/5e-35/ATP synthase subunit s, mitochondrial-like; K07554 ATP synthase, H+ transporting, mitochondrial F0 complex, subunit s	7302985/5e-29/[S] KOG3864 Uncharacterized conserved protein	A0A194AKW7/2e-79/A0A194AKW7_PINFU Uncharacterized protein OS=Pinctada fucata OX=50426 PE=4 SV=1	PTHR13382/1.5E-45/--	NA	NA

## Sheet: Unique to methylation probe
Mass spectrometry results for only methylated probes
Group_ID	Protein_Qscore	Protein_FDR	Protein_Mass	PeptideSeqs	PepIsUnique	Unique_Peptide_Num	Unique_Spectra_Num	Coverage	Peptide_Query	Abundance	iBAQ	Nr	Swissprot	KEGG	KOG	TrEMBL	Interpro	Interpro_ipr	GO
925_1	4.50075	NA	17886.8	VTSLNSTYK	1	1	2	0.0536	13288;13297	222151	74050.2	XP_022287689.1/9.38486e-22/proline-rich transmembrane protein 1-like [Crassostrea virginica]	A0A1B0GWB2/1e-11/PRT1B_HUMAN Proline rich transmembrane protein 1B OS=Homo sapiens OX=9606 GN=PRRT1B PE=3 SV=1	sko:100378930/1e-07/uncharacterized LOC100378930; K06560 mannose receptor, C type	NA	A0A210QXR9/8e-16/A0A210QXR9_MIZYE Proline-rich transmembrane protein 2 OS=Mizuhopecten yessoensis OX=6573 GN=KP79_PYT13643 PE=4 SV=1	PTHR14948/7.9E-29/--	1|IPR007593; CD225/Dispanin family	biological_process:GO:0009607//response to biotic stimulus;cellular_component:GO:0016021//integral component of membrane;
933_1	2.37455	NA	95315.9	STIMNVQSVCPNAK	1	1	1	0.0164	26430	0	0	XP_022313988.1/0/nucleosome-remodeling factor subunit NURF301-like isoform X1 [Crassostrea virginica]	Q9W0T1/1e-120/NU301_DROME Nucleosome-remodeling factor subunit NURF301 OS=Drosophila melanogaster OX=7227 GN=E(bx) PE=1 SV=2	crg:105320044/0.0/nucleosome-remodeling factor subunit BPTF isoform X1; K11728 nucleosome-remodeling factor subunit BPTF	7291946/6e-125/[BK] KOG1473 Nucleosome remodeling factor, subunit NURF301/BPTF	K1QE95/0.0/K1QE95_CRAGI Uncharacterized protein OS=Crassostrea gigas OX=29159 GN=CGI_10026260 PE=4 SV=1	PS50827/13.747/DDT domain profile.	6|IPR001965; Zinc finger, PHD-type|IPR018501; DDT domain|IPR019786; Zinc finger, PHD-type, conserved site|IPR019787; Zinc finger, PHD-finger|IPR028941; WHIM2 domain|IPR028942; WHIM1 domain	molecular_function:GO:0046872//metal ion binding;
212_1	4.50075	NA	81449.2	EDVTAMVVSTISTNTNPVK	1	1	1	0.0257	29903	0	0	XP_022319093.1/0/ADP-ribosylation factor-binding protein GGA1-like isoform X5 [Crassostrea virginica]	Q8R0H9/1e-126/GGA1_MOUSE ADP-ribosylation factor-binding protein GGA1 OS=Mus musculus OX=10090 GN=Gga1 PE=1 SV=1	crg:105335967/0.0/ADP-ribosylation factor-binding protein GGA1 isoform X1; K12404 ADP-ribosylation factor-binding protein GGA	Hs9558729/1e-124/[U] KOG1086 Cytosolic sorting protein/ADP-ribosylation factor effector GGA	K1R3V5/0.0/K1R3V5_CRAGI ADP-ribosylation factor-binding protein GGA3 OS=Crassostrea gigas OX=29159 GN=CGI_10019309 PE=4 SV=1	SM00288/1.4E-46/--	4|IPR002014; VHS domain|IPR004152; GAT domain|IPR008152; Clathrin adaptor, alpha/beta/gamma-adaptin, appendage, Ig-like subdomain|IPR008153; Gamma-adaptin ear (GAE) domain	biological_process:GO:0006886//intracellular protein transport;GO:0016192//vesicle-mediated transport;cellular_component:GO:0005622//intracellular;GO:0030131//clathrin adaptor complex;
460_1	9.00149	NA	95913.6	AAEFLVLTLR;LIGVDDVPEAR	1;1	2	2	0.0233	16637;18030	47148	2049.91	XP_022315471.1/0/disabled homolog 1-like isoform X1 [Crassostrea virginica] &gt;XP_022315472.1 disabled homolog 1-like isoform X1 [Crassostrea virginica]	P98081/6e-48/DAB_DROME Protein disabled OS=Drosophila melanogaster OX=7227 GN=Dab PE=1 SV=2	crg:105336965/0.0/disabled homolog 1 isoform X1; K12475 disabled homolog 2	7294069/4e-50/[T] KOG3535 Adaptor protein Disabled	A0A210Q2E9/3e-139/A0A210Q2E9_MIZYE Protein disabled OS=Mizuhopecten yessoensis OX=6573 GN=KP79_PYT08592 PE=4 SV=1	SM00462/1.2E-30/--	2|IPR006020; PTB/PI domain|IPR028761; Protein disabled	biological_process:GO:0032502//developmental process;molecular_function:GO:0005515//protein binding;
522_1	3.217	NA	155222	AEQTVNVVR	1	1	1	0.0064	13367	142055	1972.98	XP_022315010.1/0/uncharacterized protein LOC111119286 isoform X2 [Crassostrea virginica]	Q15262/7e-118/PTPRK_HUMAN Receptor-type tyrosine-protein phosphatase kappa OS=Homo sapiens OX=9606 GN=PTPRK PE=1 SV=2	crg:105342354/0.0/receptor-type tyrosine-protein phosphatase mu-like; K05693 receptor-type tyrosine-protein phosphatase mu [EC:3.1.3.48]	Hs18860902/3e-118/[T] KOG4228 Protein tyrosine phosphatase	A0A210QXX5/1e-179/A0A210QXX5_MIZYE Receptor-type tyrosine-protein phosphatase kappa OS=Mizuhopecten yessoensis OX=6573 GN=KP79_PYT23198 PE=4 SV=1	PS50056/19.62/Tyrosine specific protein phosphatases family profile.	7|IPR000242; PTP type protein phosphatase|IPR000387; Tyrosine specific protein phosphatases domain|IPR000742; EGF-like domain|IPR002049; Laminin EGF domain|IPR003595; Protein-tyrosine phosphatase, catalytic|IPR006212; Furin-like repeat|IPR016130; Protein-tyrosine phosphatase, active site	biological_process:GO:0006470//protein dephosphorylation;GO:0016311//dephosphorylation;molecular_function:GO:0004725//protein tyrosine phosphatase activity;GO:0016791//phosphatase activity;
834_1	2.10639	NA	431236	EINDLFR	1	1	1	0.0019	10955	88959.2	395.374	XP_021348704.1/0/uncharacterized protein LOC110447384 [Mizuhopecten yessoensis] &gt;XP_021348705.1 uncharacterized protein LOC110447384 [Mizuhopecten yessoensis] &gt;XP_021348706.1 uncharacterized protein LOC110447384 [Mizuhopecten yessoensis] &gt;OWF52739.1 E3 ubiquitin-protein ligase [Mizuhopecten yessoensis]	A0A0R4IBK5/3e-110/R213A_DANRE E3 ubiquitin-protein ligase rnf213-alpha OS=Danio rerio OX=7955 GN=rnf213a PE=3 SV=1	myi:110447384/0.0/uncharacterized protein LOC110447384; K22754 E3 ubiquitin-protein ligase RNF213 [EC:2.3.2.27]	NA	A0A210QVF9/0.0/A0A210QVF9_MIZYE E3 ubiquitin-protein ligase OS=Mizuhopecten yessoensis OX=6573 GN=KP79_PYT06321 PE=4 SV=1	PTHR22605/7.3E-280/--	4|IPR003593; AAA+ ATPase domain|IPR003959; ATPase, AAA-type, core|IPR011704; ATPase, dynein-related, AAA domain|IPR031248; RNF213 protein	molecular_function:GO:0004842//ubiquitin-protein transferase activity;GO:0005524//ATP binding;GO:0016887//ATPase activity;molecular_function:GO:0004842//ubiquitin-protein transferase activity;GO:0016887//ATPase activity;
720_1	3.217	NA	18772.6	IQEAQESEHLDLSNCELR	1	1	1	0.1071	30758	0	0	EKC39136.1/1.18242e-56/Leucine-rich repeat-containing protein 20 [Crassostrea gigas]	Q8TCA0/2e-23/LRC20_HUMAN Leucine-rich repeat-containing protein 20 OS=Homo sapiens OX=9606 GN=LRRC20 PE=1 SV=1	aml:100474177/4e-17/NPFFR1, LRRC20; neuropeptide FF receptor 1; K04240 neuropeptide FF receptor 1	7292721/1e-32/[R] KOG4579 Leucine-rich repeat (LRR) protein associated with apoptosis in muscle tissue	K1RWB1/2e-56/K1RWB1_CRAGI Leucine-rich repeat-containing protein 20 OS=Crassostrea gigas OX=29159 GN=CGI_10011156 PE=4 SV=1	SM00369/66.0/--	3|IPR001611; Leucine-rich repeat|IPR003591; Leucine-rich repeat, typical subtype|IPR037384; Leucine-rich repeat-containing protein 20	molecular_function:GO:0005515//protein binding;
331_1	4.50075	NA	61297.7	DQWELYDVINDPHEK	1	1	2	0.0279	29173;29174	21082.7	780.84	XP_022317045.1/0/N-sulphoglucosamine sulphohydrolase-like [Crassostrea virginica]	P51688/0.0/SPHM_HUMAN N-sulphoglucosamine sulphohydrolase OS=Homo sapiens OX=9606 GN=SGSH PE=1 SV=1	crg:105339838/0.0/N-sulphoglucosamine sulphohydrolase; K01565 N-sulfoglucosamine sulfohydrolase [EC:3.10.1.1]	Hs4506919/0.0/[R] KOG3867 Sulfatase	K1R6H5/0.0/K1R6H5_CRAGI N-sulfoglucosamine sulfohydrolase OS=Crassostrea gigas OX=29159 GN=CGI_10011154 PE=4 SV=1	PTHR43108:SF6/6.0E-223/--	2|IPR000917; Sulfatase, N-terminal|IPR032506; Domain of unknown function DUF4976	biological_process:GO:0008152//metabolic process;molecular_function:GO:0008484//sulfuric ester hydrolase activity;biological_process:GO:0008152//metabolic process;molecular_function:GO:0008484//sulfuric ester hydrolase activity;
507_1	9.00149	NA	57087.1	LEIGDGSGDK;VMCEVLDLEK	1;1	2	2	0.0405	12761;19437	328350	13134	XP_009043883.1/8.64843e-73/hypothetical protein LOTGIDRAFT_152179 [Lottia gigantea] &gt;ESP05338.1 hypothetical protein LOTGIDRAFT_152179 [Lottia gigantea]	Q6AXS3/5e-53/DEK_RAT Protein DEK OS=Rattus norvegicus OX=10116 GN=Dek PE=1 SV=1	crg:105336301/6e-60/protein DEK; K17046 protein DEK	Hs4503249/1e-49/[B] KOG2266 Chromatin-associated protein Dek and related proteins, contains SAP DNA binding domain	V4B4F3/2e-72/V4B4F3_LOTGI Uncharacterized protein OS=Lottia gigantea OX=225164 GN=LOTGIDRAFT_152179 PE=4 SV=1	PTHR13468/5.0E-88/--	1|IPR014876; DEK, C-terminal	NA
102_1	4.50075	NA	21998	ELAHLHVSPSDQSK	1	1	1	0.0729	26380	0	0	XP_011422093.1/1.42064e-89/PREDICTED: syntaxin-12 isoform X6 [Crassostrea gigas]	Q3ZBT5/5e-48/STX7_BOVIN Syntaxin-7 OS=Bos taurus OX=9913 GN=STX7 PE=2 SV=1	crg:105324659/2e-89/syntaxin-7 isoform X1; K08488 syntaxin 7	Hs4507295/7e-48/[U] KOG0811 SNARE protein PEP12/VAM3/Syntaxin 7/Syntaxin 17	K1R5N9/2e-88/K1R5N9_CRAGI Syntaxin-7 OS=Crassostrea gigas OX=29159 GN=CGI_10025330 PE=3 SV=1	PF14523/1.3E-25/Syntaxin-like protein	2|IPR000727; Target SNARE coiled-coil homology domain|IPR006011; Syntaxin, N-terminal domain	cellular_component:GO:0016020//membrane;
99_1	4.50075	NA	17661.8	ITELQDQEGAQLSR	1	1	1	0.0915	26820	0	0	EKC25746.1/5.08543e-57/28 kDa heat- and acid-stable phosphoprotein [Crassostrea gigas]	Q62785/4e-26/HAP28_RAT 28 kDa heat- and acid-stable phosphoprotein OS=Rattus norvegicus OX=10116 GN=Pdap1 PE=1 SV=1	NA	Hs7657441/2e-26/[R] KOG3375 Phosphoprotein/predicted coiled-coil protein	K1QW02/9e-57/K1QW02_CRAGI 28 kDa heat-and acid-stable phosphoprotein OS=Crassostrea gigas OX=29159 GN=CGI_10002252 PE=4 SV=1	PF10252/1.0E-28/Casein kinase substrate phosphoprotein PP28	1|IPR019380; Casein kinase substrate, phosphoprotein PP28	NA
886_1	3.05726	NA	49899	NAVDAFR	1	1	1	0.016	8486	77294.7	2576.49	XP_021375465.1/0/AP-2 complex subunit mu [Mizuhopecten yessoensis] &gt;OWF39841.1 AP-2 complex subunit mu [Mizuhopecten yessoensis]	Q5ZMP6/0.0/AP2M1_CHICK AP-2 complex subunit mu OS=Gallus gallus OX=9031 GN=AP2M1 PE=2 SV=1	myi:110464536/0.0/AP-2 complex subunit mu; K11826 AP-2 complex subunit mu-1	7300861/0.0/[U] KOG0938 Adaptor complexes medium subunit family	A0A210PTL9/0.0/A0A210PTL9_MIZYE AP-2 complex subunit mu OS=Mizuhopecten yessoensis OX=6573 GN=KP79_PYT21764 PE=3 SV=1	PF00928/5.4E-81/Adaptor complexes medium subunit family	4|IPR001392; Clathrin adaptor, mu subunit|IPR018240; Clathrin adaptor, mu subunit, conserved site|IPR022775; AP complex, mu/sigma subunit|IPR028565; Mu homology domain	biological_process:GO:0006886//intracellular protein transport;GO:0016192//vesicle-mediated transport;cellular_component:GO:0030131//clathrin adaptor complex;biological_process:GO:0006886//intracellular protein transport;GO:0016192//vesicle-mediated transport;cellular_component:GO:0030131//clathrin adaptor complex;molecular_function:GO:0008289//lipid binding;
368_1	4.50075	NA	28148	WALWFFK	1	1	1	0.0288	12923	0	0	XP_022318155.1/1.31071e-121/eukaryotic translation initiation factor 4E-like isoform X2 [Crassostrea virginica]	Q9DFS6/3e-97/IF4EA_DANRE Eukaryotic translation initiation factor 4E-1A OS=Danio rerio OX=7955 GN=eif4e1a PE=1 SV=1	myi:110465096/1e-120/eukaryotic translation initiation factor 4E-like; K03259 translation initiation factor 4E	Hs4503535/5e-95/[J] KOG1670 Translation initiation factor 4F, cap-binding subunit (eIF-4E) and related cap-binding proteins	A0A210PSB7/1e-119/A0A210PSB7_MIZYE Eukaryotic translation initiation factor 4E OS=Mizuhopecten yessoensis OX=6573 GN=KP79_PYT05288 PE=3 SV=1	PTHR11960:SF25/3.2E-95/--	2|IPR001040; Translation Initiation factor eIF- 4e|IPR019770; Eukaryotic translation initiation factor 4E (eIF-4E), conserved site	biological_process:GO:0006413//translational initiation;cellular_component:GO:0005737//cytoplasm;molecular_function:GO:0003723//RNA binding;GO:0003743//translation initiation factor activity;
174_1	4.50075	NA	99468	WIQQHPNLIRILGNVHQPNTNAPTNLVLTGEQYLVADDYISLDVLSSQMDVR	1	1	1	0.0603	34275	0	0	XP_022312877.1/0/paladin-like isoform X2 [Crassostrea virginica]	Q8JHZ8/0.0/PALD_CHICK Paladin OS=Gallus gallus OX=9031 GN=PALD1 PE=2 SV=2	NA	Hs22050997/2e-180/[O] TWOG0794 Protein tyrosine phosphatase	V3Z859/0.0/V3Z859_LOTGI Uncharacterized protein OS=Lottia gigantea OX=225164 GN=LOTGIDRAFT_210442 PE=4 SV=1	PTHR23339/8.7E-242/--	NA	NA
616_1	9.88325	NA	20451.5	ESLEVEEVTK;RPLWR;SSDGIIFVVDSADK	1;1;1	3	3	0.1602	17456;7536;24709	567210	70901.3	XP_011419613.1/6.10456e-99/PREDICTED: ADP-ribosylation factor-like protein 4C [Crassostrea gigas]	P61208/3e-71/ARL4C_MOUSE ADP-ribosylation factor-like protein 4C OS=Mus musculus OX=10090 GN=Arl4c PE=2 SV=1	crg:105322544/9e-100/ADP-ribosylation factor-like protein 4C; K07945 ADP-ribosylation factor-like protein 4	Hs6552296/1e-71/[U] KOG0070 GTP-binding ADP-ribosylation factor Arf1	K1QZV4/6e-83/K1QZV4_CRAGI ADP-ribosylation factor-like protein 4C OS=Crassostrea gigas OX=29159 GN=CGI_10025755 PE=4 SV=1	PS51417/19.764/small GTPase Arf family profile.	2|IPR006689; Small GTPase superfamily, ARF/SAR type|IPR024156; Small GTPase superfamily, ARF type	cellular_component:GO:0005622//intracellular;molecular_function:GO:0005525//GTP binding;
689_1	3.217	NA	42074.7	IPNALPGR	1	1	1	0.0199	9347	87524.6	9724.96	XP_014776462.1/3.42072e-87/PREDICTED: BUB3-interacting and GLEBS motif-containing protein ZNF207-like [Octopus bimaculoides] &gt;KOF82798.1 hypothetical protein OCBIM_22024821mg [Octopus bimaculoides]	O43670/5e-42/ZN207_HUMAN BUB3-interacting and GLEBS motif-containing protein ZNF207 OS=Homo sapiens OX=9606 GN=ZNF207 PE=1 SV=1	NA	7298335/3e-47/[R] KOG2893 Zn finger protein	A0A0L8H0R1/6e-87/A0A0L8H0R1_OCTBM Uncharacterized protein OS=Octopus bimaculoides OX=37653 GN=OCBIM_22024821mg PE=4 SV=1	PTHR23215/2.8E-79/--	1|IPR013087; Zinc finger C2H2-type	molecular_function:GO:0003676//nucleic acid binding;molecular_function:GO:0003677//DNA binding;
916_1	3.45935	NA	136262	GPIPQEHQVLQDIFGSLVK	1	1	1	0.0152	30408	104173	2125.98	XP_011432042.1/0/PREDICTED: protein transport protein Sec31A isoform X1 [Crassostrea gigas] &gt;EKC36089.1 transport protein Sec31A [Crassostrea gigas]	Q5F3X8/0.0/SC31A_CHICK Protein transport protein Sec31A OS=Gallus gallus OX=9031 GN=SEC31A PE=2 SV=1	crg:105331513/0.0/protein transport protein Sec31A isoform X1; K14005 protein transport protein SEC31	Hs7662370/0.0/[U] KOG0307 Vesicle coat complex COPII, subunit SEC31	K1QY85/0.0/K1QY85_CRAGI Transport protein Sec31A OS=Crassostrea gigas OX=29159 GN=CGI_10024811 PE=4 SV=1	PF07304/2.8E-5/Steroid receptor RNA activator (SRA1)	3|IPR001680; WD40 repeat|IPR009917; Steroid receptor RNA activator-protein/coat protein complex II, Sec31|IPR017986; WD40-repeat-containing domain	molecular_function:GO:0005515//protein binding;
632_1	7.55801	NA	130053	GAVLATELK;VSDWTGATYQDK	1;1	2	2	0.0186	10831;22985	183243	3105.81	XP_011432044.1/0/PREDICTED: eukaryotic translation initiation factor 3 subunit D-like [Crassostrea gigas]	Q6TH15/0.0/EIF3D_DANRE Eukaryotic translation initiation factor 3 subunit D OS=Danio rerio OX=7955 GN=eif3d PE=2 SV=1	crg:105331514/0.0/eukaryotic translation initiation factor 3 subunit D-like; K03251 translation initiation factor 3 subunit D	Hs4503523/0.0/[J] KOG2479 Translation initiation factor 3, subunit d (eIF-3d)	K1RNZ6/0.0/K1RNZ6_CRAGI Eukaryotic translation initiation factor 3 subunit D OS=Crassostrea gigas OX=29159 GN=CGI_10024813 PE=3 SV=1	PF14529/1.6E-12/Endonuclease-reverse transcriptase	2|IPR005135; Endonuclease/exonuclease/phosphatase|IPR007783; Eukaryotic translation initiation factor 3 subunit D	cellular_component:GO:0005737//cytoplasm;GO:0005852//eukaryotic translation initiation factor 3 complex;molecular_function:GO:0003743//translation initiation factor activity;
467_1	4.50075	NA	37289.8	GNFLSHWDQLTR	1	1	1	0.0348	25076	0	0	XP_011445707.1/5.73877e-157/PREDICTED: enoyl-CoA hydratase, mitochondrial-like [Crassostrea gigas]	Q8BH95/2e-124/ECHM_MOUSE Enoyl-CoA hydratase, mitochondrial OS=Mus musculus OX=10090 GN=Echs1 PE=1 SV=1	crg:105341094/9e-158/enoyl-CoA hydratase, mitochondrial-like; K07511 enoyl-CoA hydratase [EC:4.2.1.17]	Hs12707570/4e-119/[I] KOG1680 Enoyl-CoA hydratase	A0A210QSY6/5e-142/A0A210QSY6_MIZYE Enoyl-CoA hydratase, mitochondrial OS=Mizuhopecten yessoensis OX=6573 GN=KP79_PYT05629 PE=3 SV=1	PTHR11941:SF54/2.9E-105/--	2|IPR001753; Enoyl-CoA hydratase/isomerase|IPR018376; Enoyl-CoA hydratase/isomerase, conserved site	biological_process:GO:0008152//metabolic process;molecular_function:GO:0003824//catalytic activity;
51_1	9.00149	NA	24396.8	DGNGFISAAELR;EAFSLFDK	1;1	2	2	0.0913	19847;12050	65916.5	5493.04	XP_011429056.1/1.13728e-93/PREDICTED: calmodulin-A-like isoform X2 [Crassostrea gigas] &gt;XP_022319106.1 calmodulin-A-like [Crassostrea virginica]	Q8STF0/6e-88/CALM_STRIE Calmodulin OS=Strongylocentrotus intermedius OX=7667 PE=2 SV=3	crg:105329480/2e-94/calmodulin-A-like isoform X2; K02183 calmodulin	7303485/7e-88/[T] KOG0027 Calmodulin and related proteins (EF-Hand superfamily)	A0A3P9KBA8/9e-89/A0A3P9KBA8_ORYLA Uncharacterized protein OS=Oryzias latipes OX=8090 PE=3 SV=1	PF13499/2.1E-14/EF-hand domain pair	2|IPR002048; EF-hand domain|IPR018247; EF-Hand 1, calcium-binding site	molecular_function:GO:0005509//calcium ion binding;molecular_function:GO:0005509//calcium ion binding;
922_1	2.71812	NA	32208.3	ALILYDSIK	1	1	1	0.0314	13846	35211.8	2515.13	XP_021379033.1/1.65226e-68/transmembrane protein 69-like isoform X2 [Mizuhopecten yessoensis] &gt;OWF38084.1 Transmembrane protein 69 [Mizuhopecten yessoensis]	Q0V9J0/6e-37/TMM69_XENTR Transmembrane protein 69 OS=Xenopus tropicalis OX=8364 GN=tmem69 PE=2 SV=1	phu:Phum_PHUM606410/3e-17/hypothetical protein; K13168 splicing factor, arginine/serine-rich 16	NA	A0A210PNQ5/3e-68/A0A210PNQ5_MIZYE Transmembrane protein 69 OS=Mizuhopecten yessoensis OX=6573 GN=KP79_PYT09113 PE=4 SV=1	PTHR15887/3.5E-54/--	1|IPR021836; Protein of unknown function DUF3429	cellular_component:GO:0016021//integral component of membrane;
51_3	2.1655	NA	41802.8	AGFAGDDAPR;AVFPSIVGRPR;DLYANTVLSGGSTMFPGIADR;DSYVGDEAQSK;GYSFTTTAER;HQGVMVGMGQK;IIAPPER;IWHHTFYNELR;QEYDESGPSIVHR;SYELPDGQVITIGNER;VAPEEHPVLLTEAPLNPK	0;0;1;0;0;0;0;0;0;0;0	1	1	0.3697	12511;12513;18461;30889;18450;18448;16625;16624;18142;17683;17719;17718;17717;17685;8572;25868;25869;25874;25875;25872;25873;25867;25892;25893;25913;25592;28453;28452;28454;29515;29516	0	0	ALK82320.1/0/actin [Pinctada fucata]	P12716/0.0/ACTC_PISOC Actin, cytoplasmic OS=Pisaster ochraceus OX=7612 PE=3 SV=1	pdam:113676617/0.0/actin, cytoplasmic; K05692 actin beta/gamma 1	7290649/0.0/[Z] KOG0676 Actin and related proteins	A0A3M6TK64/0.0/A0A3M6TK64_9CNID Uncharacterized protein OS=Pocillopora damicornis OX=46731 GN=pdam_00019851 PE=3 SV=1	PTHR11937/3.7E-268/--	3|IPR004000; Actin family|IPR004001; Actin, conserved site|IPR020902; Actin/actin-like conserved site	NA
444_1	2.51052	NA	66165.5	FAVAHQGPISVAIDASHK	1	1	1	0.0308	28842	0	0	XP_021346527.1/0/digestive cysteine proteinase 1-like [Mizuhopecten yessoensis] &gt;OWF53775.1 Counting factor associated protein D [Mizuhopecten yessoensis]	Q54TR1/9e-93/CFAD_DICDI Counting factor associated protein D OS=Dictyostelium discoideum OX=44689 GN=cfaD PE=1 SV=1	spu:575203/1e-76/cathepsin L1; K01365 cathepsin L [EC:3.4.22.15]	7294432/0.0/[O] KOG1543 Cysteine proteinase Cathepsin L	A0A210QYL7/0.0/A0A210QYL7_MIZYE Counting factor associated protein D OS=Mizuhopecten yessoensis OX=6573 GN=KP79_PYT08444 PE=3 SV=1	SM00848/8.5E-15/--	6|IPR000169; Cysteine peptidase, cysteine active site|IPR000668; Peptidase C1A, papain C-terminal|IPR013128; Peptidase C1A|IPR013201; Cathepsin propeptide inhibitor domain (I29)|IPR025660; Cysteine peptidase, histidine active site|IPR025661; Cysteine peptidase, asparagine active site	biological_process:GO:0006508//proteolysis;molecular_function:GO:0008234//cysteine-type peptidase activity;molecular_function:GO:0008234//cysteine-type peptidase activity;
285_1	2.44735	NA	25492.2	QDPFPLVVEK	1	1	1	0.045	17694	56086.5	5608.65	XP_011429702.1/3.64862e-90/PREDICTED: protein sym-1 isoform X1 [Crassostrea gigas]	Q5TZ51/1e-41/MPV17_DANRE Protein Mpv17 OS=Danio rerio OX=7955 GN=mpv17 PE=2 SV=1	crg:105329911/6e-91/protein sym-1 isoform X1; K13348 protein Mpv17	Hs4505241/2e-35/[R] KOG1944 Peroxisomal membrane protein MPV17 and related proteins	K1QEJ7/7e-85/K1QEJ7_CRAGI Protein Mpv17 OS=Crassostrea gigas OX=29159 GN=CGI_10009325 PE=3 SV=1	PTHR11266:SF17/7.1E-53/--	1|IPR007248; Mpv17/PMP22	cellular_component:GO:0016021//integral component of membrane;
690_1	4.50075	NA	72351.7	GFPFLSGGAPR	1	1	1	0.0174	15867	25761.2	613.361	XP_022324460.1/0/syntaxin-binding protein 1-like isoform X1 [Crassostrea virginica]	P61765/0.0/STXB1_RAT Syntaxin-binding protein 1 OS=Rattus norvegicus OX=10116 GN=Stxbp1 PE=1 SV=1	crg:105337549/0.0/syntaxin-binding protein 1-like isoform X1; K15292 syntaxin-binding protein 1	Hs4507297/0.0/[U] KOG1300 Vesicle trafficking protein Sec1	A0A3S1B8E4/0.0/A0A3S1B8E4_ELYCH Uncharacterized protein OS=Elysia chlorotica OX=188477 GN=EGW08_017691 PE=3 SV=1	PTHR11679/6.0E-279/--	1|IPR001619; Sec1-like protein	biological_process:GO:0006904//vesicle docking involved in exocytosis;GO:0016192//vesicle-mediated transport;
623_1	4.50075	NA	60787.5	QTAHELISALSDGIEELK	1	1	1	0.0325	29512	8656.9	346.276	XP_011440595.1/1.69337e-120/PREDICTED: rap guanine nucleotide exchange factor 1 isoform X7 [Crassostrea gigas]	Q13905/6e-14/RPGF1_HUMAN Rap guanine nucleotide exchange factor 1 OS=Homo sapiens OX=9606 GN=RAPGEF1 PE=1 SV=3	crg:105337544/4e-121/rap guanine nucleotide exchange factor 1 isoform X1; K06277 Rap guanine nucleotide exchange factor 1	Hs4885357/3e-14/[T] KOG3417 Ras1 guanine nucleotide exchange factor	A0A210QQ99/4e-104/A0A210QQ99_MIZYE Rap guanine nucleotide exchange factor 1 OS=Mizuhopecten yessoensis OX=6573 GN=KP79_PYT04561 PE=4 SV=1	PTHR23113/3.5E-23/--	NA	NA
495_1	4.50075	NA	71489.3	NLAIVLFR	1	1	1	0.0128	11826	0	0	XP_011437426.2/0/PREDICTED: protein GPR107-like [Crassostrea gigas]	D3ZWZ9/2e-155/GP107_RAT Protein GPR107 OS=Rattus norvegicus OX=10116 GN=Gpr107 PE=1 SV=1	crg:105335303/0.0/protein GPR107-like; K22985 G protein-coupled receptor 107	7291031/3e-135/[T] KOG2569 G protein-coupled seven transmembrane receptor	A0A0L8FSQ3/0.0/A0A0L8FSQ3_OCTBM Uncharacterized protein OS=Octopus bimaculoides OX=37653 GN=OCBIM_22009082mg PE=4 SV=1	PTHR21229:SF2/5.4E-168/--	1|IPR009637; Lung seven transmembrane receptor-like	cellular_component:GO:0016021//integral component of membrane;
788_1	2.77622	NA	22184.5	TDVYSQISEPK	1	1	1	0.0576	20294	0	0	XP_021340161.1/2.01559e-97/UPF0428 protein CXorf56 homolog [Mizuhopecten yessoensis] &gt;OWF36651.1 UPF0428 protein CXorf56-like [Mizuhopecten yessoensis]	Q3T197/6e-60/CX056_BOVIN UPF0428 protein CXorf56 homolog OS=Bos taurus OX=9913 PE=2 SV=1	NA	Hs11545813/3e-60/[S] KOG4397 Uncharacterized conserved protein	A0A210PJH9/4e-97/A0A210PJH9_MIZYE UPF0428 protein CXorf56-like OS=Mizuhopecten yessoensis OX=6573 GN=KP79_PYT03038 PE=4 SV=1	PTHR13420:SF4/1.1E-48/--	1|IPR029704; UPF0428 family	NA
917_1	3.217	NA	103227	TAVQSQLDGVR	1	1	1	0.0124	17745	6390.98	116.2	XP_011455506.1/0/PREDICTED: exocyst complex component 3 isoform X2 [Crassostrea gigas]	O60645/0.0/EXOC3_HUMAN Exocyst complex component 3 OS=Homo sapiens OX=9606 GN=EXOC3 PE=1 SV=3	crg:105347944/0.0/exocyst complex component 3 isoform X1; K06110 exocyst complex component 3	7302583/2e-135/[U] KOG2286 Exocyst complex subunit SEC6	A0A210PZ23/0.0/A0A210PZ23_MIZYE Exocyst complex component 3 OS=Mizuhopecten yessoensis OX=6573 GN=KP79_PYT23917 PE=4 SV=1	PTHR21292/1.1E-209/--	1|IPR010326; Exocyst complex component EXOC3/Sec6	biological_process:GO:0006887//exocytosis;cellular_component:GO:0000145//exocyst;
588_1	2.13032	NA	137643	NLVSSLEER	1	1	1	0.0074	14088	597290	8071.49	XP_021365199.1/0/arf-GAP with SH3 domain, ANK repeat and PH domain-containing protein 2-like isoform X1 [Mizuhopecten yessoensis] &gt;OWF44682.1 Arf-GAP with SH3 domain, ANK repeat and PH domain-containing protein 2 [Mizuhopecten yessoensis]	Q9ULH1/0.0/ASAP1_HUMAN Arf-GAP with SH3 domain, ANK repeat and PH domain-containing protein 1 OS=Homo sapiens OX=9606 GN=ASAP1 PE=1 SV=4	myi:110458003/0.0/arf-GAP with SH3 domain, ANK repeat and PH domain-containing protein 2-like isoform X1; K12488 Arf-GAP with SH3 domain, ANK repeat and PH domain-containing protein	CE28116/2e-32/[T] KOG0705 GTPase-activating protein Centaurin gamma (contains Ras-like GTPase, PH and ankyrin repeat domains)	A0A210Q7G5/0.0/A0A210Q7G5_MIZYE Arf-GAP with SH3 domain, ANK repeat and PH domain-containing protein 2 OS=Mizuhopecten yessoensis OX=6573 GN=KP79_PYT24032 PE=4 SV=1	PS50002/13.234/Src homology 3 (SH3) domain profile.	5|IPR001164; Arf GTPase activating protein|IPR001452; SH3 domain|IPR001849; Pleckstrin homology domain|IPR002110; Ankyrin repeat|IPR020683; Ankyrin repeat-containing domain	molecular_function:GO:0005096//GTPase activator activity;GO:0005515//protein binding;
198_1	9.00149	NA	18640.9	LPFVPIGLLQGISHR;QGGGLFGTPTQLSSR	1;1	2	3	0.1818	27327;27326;25694	168296	21037.1	XP_013073429.1/2.20683e-97/PREDICTED: transmembrane and coiled-coil domain-containing protein 1-like [Biomphalaria glabrata]	Q6DGW9/4e-83/TMCO1_DANRE Calcium load-activated calcium channel OS=Danio rerio OX=7955 GN=tmco1 PE=2 SV=1	myi:110447960/1e-97/calcium load-activated calcium channel-like; K21891 calcium load-activated calcium channel	7298528/1e-91/[S] KOG3312 Predicted membrane protein	A0A2C9JMI7/4e-97/A0A2C9JMI7_BIOGL Calcium load-activated calcium channel OS=Biomphalaria glabrata OX=6526 GN=106060180 PE=3 SV=1	PF01956/6.6E-38/Integral membrane protein DUF106	2|IPR002809; Integral membrane protein EMC3/TMCO1-like|IPR008559; Calcium load-activated calcium channel	biological_process:GO:0032469//endoplasmic reticulum calcium ion homeostasis;cellular_component:GO:0016020//membrane;GO:0030176//integral component of endoplasmic reticulum membrane;molecular_function:GO:0005262//calcium channel activity;
309_1	9.00149	NA	38389.3	GPQLICSGSDDGTIK;LSNLDAPIMLLTGHEGDIYTSK	1;1	2	2	0.1072	26376;31612	0	0	XP_022306811.1/0/U5 small nuclear ribonucleoprotein 40 kDa protein-like [Crassostrea virginica]	Q6PE01/0.0/SNR40_MOUSE U5 small nuclear ribonucleoprotein 40 kDa protein OS=Mus musculus OX=10090 GN=Snrnp40 PE=1 SV=1	crg:105327775/0.0/U5 small nuclear ribonucleoprotein 40 kDa protein; K12857 Prp8 binding protein	Hs13629793/0.0/[A] KOG0265 U5 snRNP-specific protein-like factor and related proteins	K1RHY3/0.0/K1RHY3_CRAGI U5 small nuclear ribonucleoprotein 40 kDa protein OS=Crassostrea gigas OX=29159 GN=CGI_10014723 PE=4 SV=1	PS50082/12.747/Trp-Asp (WD) repeats profile.	4|IPR001680; WD40 repeat|IPR017986; WD40-repeat-containing domain|IPR019775; WD40 repeat, conserved site|IPR020472; G-protein beta WD-40 repeat	molecular_function:GO:0005515//protein binding;cellular_component:GO:0030529//intracellular ribonucleoprotein complex;GO:0019013//viral nucleocapsid;
85_1	2.84974	NA	188937	HTSFVGVDK	1	1	1	0.0052	12750	735132	8751.58	XP_021367751.1/6.4135e-170/von Willebrand factor A domain-containing protein 5A-like [Mizuhopecten yessoensis] &gt;OWF43481.1 von Willebrand factor A domain-containing protein 5A [Mizuhopecten yessoensis]	O18405/3e-132/SURF4_DROME Surfeit locus protein 4 homolog OS=Drosophila melanogaster OX=7227 GN=Surf4 PE=2 SV=1	myi:110447573/5e-151/surfeit locus protein 4-like; K20369 ER-derived vesicles protein	Hs4504781/2e-14/[O] LSE2193 H Plasma inter-alpha-trypsin inhibitor	A0A210Q434/1e-169/A0A210Q434_MIZYE von Willebrand factor A domain-containing protein 5A OS=Mizuhopecten yessoensis OX=6573 GN=KP79_PYT23893 PE=4 SV=1	PF13768/3.1E-23/von Willebrand factor type A domain	3|IPR002035; von Willebrand factor, type A|IPR002995; Surfeit locus 4|IPR013694; VIT domain	cellular_component:GO:0016021//integral component of membrane;
389_1	2.84974	NA	77761.9	ETFFPSILGAVR	1	1	1	0.0172	22191	0	0	XP_022344718.1/8.86577e-153/zinc finger and SCAN domain-containing protein 21-like [Crassostrea virginica]	Q9NTW7/3e-19/ZF64B_HUMAN Zinc finger protein 64 OS=Homo sapiens OX=9606 GN=ZFP64 PE=1 SV=3	shr:100928949/3e-21/zinc finger protein 2 homolog; K09229 KRAB and SCAN domains-containing zinc finger protein	Hs8922627/9e-21/[R] KOG1721 FOG: Zn-finger	K1Q9C1/6e-148/K1Q9C1_CRAGI Zinc finger protein 64-like protein, isoforms 1 and 2 OS=Crassostrea gigas OX=29159 GN=CGI_10017716 PE=4 SV=1	PF00096/0.0024/Zinc finger, C2H2 type	1|IPR013087; Zinc finger C2H2-type	molecular_function:GO:0003676//nucleic acid binding;biological_process:GO:0040034//regulation of development, heterochronic;molecular_function:GO:0000981//RNA polymerase II transcription factor activity, sequence-specific DNA binding;GO:0003676//nucleic acid binding;
52_1	4.50075	NA	54857.3	NPYPTK	1	1	1	0.0119	7412	43991.9	1832.99	XP_011443270.1/0/PREDICTED: iroquois-class homeodomain protein IRX-6 [Crassostrea gigas] &gt;EKC30856.1 Homeobox protein caupolican [Crassostrea gigas]	P54269/9e-63/CAUP_DROME Homeobox protein caupolican OS=Drosophila melanogaster OX=7227 GN=caup PE=2 SV=2	spu:575445/5e-12/homeobox protein TGIF2-like; K19383 homeobox protein TGIF1	7294554/4e-63/[K] KOG0773 Transcription factor MEIS1 and related HOX domain proteins	K1RA01/0.0/K1RA01_CRAGI Homeobox protein caupolican OS=Crassostrea gigas OX=29159 GN=CGI_10028533 PE=4 SV=1	PS00027/-/'Homeobox' domain signature.	3|IPR001356; Homeobox domain|IPR008422; Homeobox KN domain|IPR017970; Homeobox, conserved site	biological_process:GO:0006355//regulation of transcription, DNA-templated;molecular_function:GO:0003677//DNA binding;GO:0043565//sequence-specific DNA binding;biological_process:GO:0006355//regulation of transcription, DNA-templated;cellular_component:GO:0005634//nucleus;molecular_function:GO:0043565//sequence-specific DNA binding;
11_1	4.50075	NA	26766.3	VLEGMDVVR;VVIGLFGDTVPK	0;1	1	1	0.0837	13414;19699	136786	10522	XP_005177075.1/3.89073e-82/PREDICTED: peptidyl-prolyl cis-trans isomerase 5 [Musca domestica]	P24369/1e-77/PPIB_MOUSE Peptidyl-prolyl cis-trans isomerase B OS=Mus musculus OX=10090 GN=Ppib PE=1 SV=2	mde:101890017/6e-83/peptidyl-prolyl cis-trans isomerase 5; K03768 peptidyl-prolyl cis-trans isomerase B (cyclophilin B) [EC:5.2.1.8]	7291447/2e-81/[O] KOG0880 Peptidyl-prolyl cis-trans isomerase	A0A0K0EGJ6/3e-82/A0A0K0EGJ6_STRER Peptidyl-prolyl cis-trans isomerase OS=Strongyloides stercoralis OX=6248 PE=3 SV=1	PF00160/2.4E-23/Cyclophilin type peptidyl-prolyl cis-trans isomerase/CLD	3|IPR002130; Cyclophilin-type peptidyl-prolyl cis-trans isomerase domain|IPR020892; Cyclophilin-type peptidyl-prolyl cis-trans isomerase, conserved site|IPR024936; Cyclophilin-type peptidyl-prolyl cis-trans isomerase	biological_process:GO:0000413//protein peptidyl-prolyl isomerization;GO:0006457//protein folding;molecular_function:GO:0003755//peptidyl-prolyl cis-trans isomerase activity;biological_process:GO:0032504//multicellular organism reproduction;GO:0006457//protein folding;cellular_component:GO:0012505//endomembrane system;GO:0005615//extracellular space;molecular_function:GO:0003755//peptidyl-prolyl c…
395_1	4.50075	NA	38343.6	TLVNLTSSGAAEAK	1	1	1	0.0397	22754	37882.4	2104.58	XP_022343569.1/8.29025e-123/heterogeneous nuclear ribonucleoprotein C-like isoform X1 [Crassostrea virginica]	P19600/7e-28/HNRPC_XENLA Heterogeneous nuclear ribonucleoprotein C OS=Xenopus laevis OX=8355 GN=hnrnpc PE=2 SV=1	sanh:107659349/2e-29/heterogeneous nuclear ribonucleoprotein C-like; K12884 heterogeneous nuclear ribonucleoprotein C1/C2	Hs4758544/3e-28/[R] KOG0118 FOG: RRM domain	K1PQE3/1e-118/K1PQE3_CRAGI RNA-binding protein Raly OS=Crassostrea gigas OX=29159 GN=CGI_10011751 PE=4 SV=1	PS00028/-/Zinc finger C2H2 type domain signature.	2|IPR000504; RNA recognition motif domain|IPR013087; Zinc finger C2H2-type	molecular_function:GO:0003676//nucleic acid binding;
841_1	3.217	NA	35783.2	FGLGGGPR	1	1	1	0.0258	8012	36711.8	2159.52	XP_022342491.1/7.94066e-98/ubiquitin-conjugating enzyme E2 Q1-like [Crassostrea virginica]	Q9VM35/2e-19/U2QL1_DROME Ubiquitin-conjugating enzyme E2Q-like protein CG4502 OS=Drosophila melanogaster OX=7227 GN=CG4502 PE=2 SV=1	crg:105332261/2e-94/ubiquitin-conjugating enzyme E2 25; K10582 ubiquitin-conjugating enzyme E2 Q [EC:2.3.2.23]	7296802/3e-11/[O] KOG0419 Ubiquitin-protein ligase	K1QXX2/3e-85/K1QXX2_CRAGI Ubiquitin-conjugating enzyme E2 Q2 OS=Crassostrea gigas OX=29159 GN=CGI_10008712 PE=4 SV=1	PTHR24068:SF72/4.1E-38/--	1|IPR000608; Ubiquitin-conjugating enzyme E2	NA
302_1	4.50075	NA	57002.5	LGVGESILQSR	1	1	1	0.0217	17356	270359	10814.3	XP_021373503.1/5.97572e-134/uncharacterized protein LOC110463324 [Mizuhopecten yessoensis] &gt;OWF40794.1 hypothetical protein KP79_PYT13364 [Mizuhopecten yessoensis]	Q96KR6/2e-35/F210B_HUMAN Protein FAM210B, mitochondrial OS=Homo sapiens OX=9606 GN=FAM210B PE=1 SV=2	clec:106665797/9e-15/NAD-dependent protein deacylase-like isoform X1; K11415 NAD-dependent deacetylase sirtuin 5 [EC:3.5.1.-]	7295644/6e-10/[S] KOG4082 Uncharacterized conserved protein	A0A210PWD8/1e-133/A0A210PWD8_MIZYE Uncharacterized protein OS=Mizuhopecten yessoensis OX=6573 GN=KP79_PYT13364 PE=4 SV=1	PF06916/1.9E-23/Protein of unknown function (DUF1279)	1|IPR009688; Domain of unknown function DUF1279	NA
10_1	7.71775	NA	116789	NNEVLLPYK;YFEVLDETGVK	1;1	2	2	0.0192	15366;21136	155795	2472.93	XP_022343987.1/0/uncharacterized protein LOC111137051 [Crassostrea virginica] &gt;XP_022343988.1 uncharacterized protein LOC111137051 [Crassostrea virginica] &gt;XP_022343989.1 uncharacterized protein LOC111137051 [Crassostrea virginica] &gt;XP_022343990.1 uncharacterized protein LOC111137051 [Crassostrea virginica] &gt;XP_022343991.1 uncharacterized protein LOC111137051 [Crassostrea virginica] &…	P17038/2e-11/ZNF43_HUMAN Zinc finger protein 43 OS=Homo sapiens OX=9606 GN=ZNF43 PE=2 SV=4	crg:105336026/0.0/uncharacterized protein LOC105336026; K09228 KRAB domain-containing zinc finger protein	Hs6005976/4e-13/[R] KOG1721 FOG: Zn-finger	A0A0L8G0S6/0.0/A0A0L8G0S6_OCTBM Uncharacterized protein OS=Octopus bimaculoides OX=37653 GN=OCBIM_22002869mg PE=4 SV=1	PS50157/9.806/Zinc finger C2H2 type domain profile.	1|IPR013087; Zinc finger C2H2-type	molecular_function:GO:0003676//nucleic acid binding;molecular_function:GO:0046872//metal ion binding;GO:0003676//nucleic acid binding;
647_2	2.84974	NA	195739	GASTPAIR;QVSGTGAAGR	1;0	1	1	0.0104	8199;10472	124477	1430.77	AGS13737.1/0/purple acid phosphatase [Pinctada martensii]	A5D6U8/1e-70/ACP7_DANRE Acid phosphatase type 7 OS=Danio rerio OX=7955 GN=acp7 PE=2 SV=1	crg:105325385/5e-159/acid phosphatase type 7; K22390 acid phosphatase type 7	7292570/6e-73/[G] KOG1378 Purple acid phosphatase	S5S2F6/0.0/S5S2F6_PINIB Purple acid phosphatase OS=Pinctada imbricata OX=66713 GN=PAP PE=2 SV=1	PF00149/7.5E-16/Calcineurin-like phosphoesterase	9|IPR003593; AAA+ ATPase domain|IPR003959; ATPase, AAA-type, core|IPR004843; Calcineurin-like phosphoesterase domain, ApaH type|IPR005135; Endonuclease/exonuclease/phosphatase|IPR005818; Linker histone H1/H5, domain H15|IPR005819; Histone H5|IPR025733; Iron/zinc purple acid phosphatase-like C-terminal domain|IPR038717; Tc1-like transposase, DDE domain|IPR039331; Purple acid phosphatase-like	biological_process:GO:0006334//nucleosome assembly;cellular_component:GO:0000786//nucleosome;GO:0005634//nucleus;molecular_function:GO:0003677//DNA binding;GO:0003993//acid phosphatase activity;GO:0005524//ATP binding;GO:0016787//hydrolase activity;cellular_component:GO:0016021//integral component of membrane;molecular_function:GO:0046872//metal ion binding;GO:0003993//acid phosphatase activity;
437_1	2.58375	NA	38715.1	HVLNTDAPPK	1	1	1	0.0284	15435	4895.92	212.866	XP_019918313.1/1.20104e-79/PREDICTED: glycogen-binding subunit 76A isoform X2 [Crassostrea gigas]	Q9VVY3/2e-20/GBS76_DROME Glycogen-binding subunit 76A OS=Drosophila melanogaster OX=7227 GN=Gbs-76A PE=1 SV=1	myi:110446317/3e-80/glycogen-binding subunit 76A-like; K07189 protein phosphatase 1 regulatory subunit 3A/B/C/D/E	7293805/9e-21/[OT] KOG3986 Protein phosphatase, regulatory subunit PPP1R3C/D	A0A210QXT7/3e-79/A0A210QXT7_MIZYE Glycogen-binding subunit 76A OS=Mizuhopecten yessoensis OX=6573 GN=KP79_PYT13663 PE=4 SV=1	PTHR12307/1.0E-32/--	NA	NA
487_1	4.50075	NA	20152.3	NTYPQSSATVHLPLDINDR	1	1	1	0.1056	30601	100965	9178.64	XP_022295973.1/1.51198e-21/complement C1q-like protein 4 [Crassostrea virginica]	Q9BXI9/3e-11/C1QT6_HUMAN Complement C1q tumor necrosis factor-related protein 6 OS=Homo sapiens OX=9606 GN=C1QTNF6 PE=1 SV=4	sbq:101030865/2e-10/C1QTNF6; complement C1q tumor necrosis factor-related protein 6; K19470 complement C1q tumor necrosis factor-related protein 6	Hs21361985/1e-11/[R] LSE3568 H Complement-c1q tumor necrosis factor-related protein/Adipocyte-specific secretory protein, and related proteins	A0A194AN26/4e-22/A0A194AN26_PINFU Uncharacterized protein OS=Pinctada fucata OX=50426 PE=4 SV=1	PTHR22923:SF68/1.5E-21/--	1|IPR001073; C1q domain	NA
937_1	4.50075	NA	19513.1	TGTTIVYDK	1	1	1	0.0517	12922	183838	16712.5	AAZ76258.1/5.01619e-42/mantle gene 4 [Pinctada fucata]	P83425/9e-12/HIP_MYTED Heavy metal-binding protein HIP OS=Mytilus edulis OX=6550 PE=1 SV=1	ccw:104697545/9e-09/collagen alpha-1(IX) chain; K03986 complement C1q subcomponent subunit A	Hs13569919/2e-08/[R] LSE3568 H Complement-c1q tumor necrosis factor-related protein/Adipocyte-specific secretory protein, and related proteins	Q3YL62/9e-42/Q3YL62_PINFU Mantle gene 4 OS=Pinctada fucata OX=50426 PE=2 SV=1	PS50871/23.314/C1q domain profile.	1|IPR001073; C1q domain	NA
383_1	4.50075	NA	17908.7	TGDVVNLR	1	1	1	0.0506	10186	38799.3	3527.21	AAZ76258.1/2.43181e-111/mantle gene 4 [Pinctada fucata]	Q5RJ80/4e-11/CAPR2_DANRE Caprin-2 OS=Danio rerio OX=7955 GN=caprin2 PE=1 SV=1	tru:101066959/4e-12/caprin2; caprin family member 2; K18744 caprin-2	Hs13569919/1e-09/[R] LSE3568 H Complement-c1q tumor necrosis factor-related protein/Adipocyte-specific secretory protein, and related proteins	Q3YL62/4e-111/Q3YL62_PINFU Mantle gene 4 OS=Pinctada fucata OX=50426 PE=2 SV=1	PS50871/18.007/C1q domain profile.	1|IPR001073; C1q domain	NA
643_1	3.217	NA	146720	AVEDAIAR	1	1	1	0.006	9526	164671	2255.76	XP_011451687.1/2.71259e-100/PREDICTED: zinc finger CCCH domain-containing protein 18 [Crassostrea gigas] &gt;XP_011451689.1 PREDICTED: zinc finger CCCH domain-containing protein 18 [Crassostrea gigas] &gt;XP_019929689.1 PREDICTED: zinc finger CCCH domain-containing protein 18 [Crassostrea gigas]	Q86VM9/1e-36/ZCH18_HUMAN Zinc finger CCCH domain-containing protein 18 OS=Homo sapiens OX=9606 GN=ZC3H18 PE=1 SV=2	crg:105345285/4e-101/zinc finger CCCH domain-containing protein 18; K13092 nuclear protein NHN1	NA	A0A210QF28/3e-90/A0A210QF28_MIZYE Zinc finger CCCH domain-containing protein 18 OS=Mizuhopecten yessoensis OX=6573 GN=KP79_PYT01328 PE=4 SV=1	PS50103/15.112/Zinc finger C3H1-type profile.	1|IPR000571; Zinc finger, CCCH-type	molecular_function:GO:0046872//metal ion binding;molecular_function:GO:0046872//metal ion binding;
711_1	4.50075	NA	191840	NTNTGNEVDIVSK	1	1	1	0.0074	23462	719159	11986	XP_011447399.1/0/PREDICTED: low-density lipoprotein receptor-related protein 4-like isoform X2 [Crassostrea gigas]	Q91VN0/3e-51/LRP5_MOUSE Low-density lipoprotein receptor-related protein 5 OS=Mus musculus OX=10090 GN=Lrp5 PE=1 SV=3	crg:105342220/0.0/low-density lipoprotein receptor-related protein 4-like isoform X2; K20051 low-density lipoprotein receptor-related protein 4	Hs4505019/9e-50/[T] KOG1215 Low-density lipoprotein receptors containing Ca2+-binding EGF-like domains	K1QV93/0.0/K1QV93_CRAGI Low-density lipoprotein receptor-related protein 4 OS=Crassostrea gigas OX=29159 GN=CGI_10018781 PE=4 SV=1	PS51120/10.249/LDL-receptor class B (LDLRB) repeat profile.	5|IPR000033; LDLR class B repeat|IPR001007; VWFC domain|IPR003410; HYR domain|IPR008197; WAP-type 'four-disulfide core' domain|IPR011641; Tyrosine-protein kinase ephrin type A/B receptor-like	cellular_component:GO:0005576//extracellular region;molecular_function:GO:0005515//protein binding;GO:0030414//peptidase inhibitor activity;
260_1	2.51052	NA	21504.7	AVQNLPTTAK	1	1	1	0.0518	14001	13295.6	1477.28	XP_011442898.1/3.11482e-30/PREDICTED: heavy metal-binding protein HIP-like isoform X2 [Crassostrea gigas] &gt;XP_019927318.1 PREDICTED: heavy metal-binding protein HIP-like isoform X1 [Crassostrea gigas]	Q5RJ80/2e-12/CAPR2_DANRE Caprin-2 OS=Danio rerio OX=7955 GN=caprin2 PE=1 SV=1	amex:103029310/8e-12/caprin-2-like isoform X1; K18744 caprin-2	Hs22041041/6e-12/[R] LSE3568 H Complement-c1q tumor necrosis factor-related protein/Adipocyte-specific secretory protein, and related proteins	K1QBA7/2e-29/K1QBA7_CRAGI Complement C1q tumor necrosis factor-related protein 3 OS=Crassostrea gigas OX=29159 GN=CGI_10013066 PE=4 SV=1	PR00007/7.6E-14/Complement C1Q domain signature	1|IPR001073; C1q domain	NA
363_1	2.17003	NA	27081.6	DDLFDFLPEK	1	1	1	0.0417	19505	0	0	XP_022344033.1/1.92588e-100/density-regulated protein homolog [Crassostrea virginica]	Q5ZJ39/4e-62/DENR_CHICK Density-regulated protein OS=Gallus gallus OX=9031 GN=DENR PE=2 SV=1	NA	7293298/3e-59/[R] KOG3239 Density-regulated protein related to translation initiation factor 1 (eIF-1/SUI1)	K1QGW4/8e-99/K1QGW4_CRAGI Density-regulated protein OS=Crassostrea gigas OX=29159 GN=CGI_10019799 PE=4 SV=1	PTHR12789/9.9E-66/--	2|IPR001950; SUI1 domain|IPR005872; Archaeal/bacterial translation initiation factor SUI1	biological_process:GO:0006413//translational initiation;molecular_function:GO:0003743//translation initiation factor activity;molecular_function:GO:0003743//translation initiation factor activity;
854_1	4.50075	NA	36850.8	VIEEAYR	1	1	1	0.0214	10313	16120.9	806.043	XP_022337593.1/1.33592e-145/2-methoxy-6-polyprenyl-1,4-benzoquinol methylase, mitochondrial-like [Crassostrea virginica]	Q0P5A2/7e-124/COQ5_BOVIN 2-methoxy-6-polyprenyl-1,4-benzoquinol methylase, mitochondrial OS=Bos taurus OX=9913 GN=COQ5 PE=2 SV=1	myi:110464631/3e-141/2-methoxy-6-polyprenyl-1,4-benzoquinol methylase, mitochondrial-like; K06127 2-methoxy-6-polyprenyl-1,4-benzoquinol methylase [EC:2.1.1.201]	Hs14150080/5e-121/[H] KOG1540 Ubiquinone biosynthesis methyltransferase COQ5	A0A210PTI0/3e-140/A0A210PTI0_MIZYE 2-methoxy-6-polyprenyl-1,4-benzoquinol methylase, mitochondrial OS=Mizuhopecten yessoensis OX=6573 GN=KP79_PYT16547 PE=3 SV=1	PS51608/94.572/UbiE family SAM-binding methyltransferase profile.	2|IPR004033; UbiE/COQ5 methyltransferase|IPR023576; UbiE/COQ5 methyltransferase, conserved site	molecular_function:GO:0008168//methyltransferase activity;
696_1	2.35144	NA	191684	YQEQLQLAK	1	1	1	0.0052	16321	2.26447e+07	248843	XP_022286358.1/0/LOW QUALITY PROTEIN: tetratricopeptide repeat protein 28-like [Crassostrea virginica]	Q96AY4/0.0/TTC28_HUMAN Tetratricopeptide repeat protein 28 OS=Homo sapiens OX=9606 GN=TTC28 PE=1 SV=4	xtr:100380004/6e-51/gpsm2, dfnb82, lgn, pins; G-protein signaling modulator 2; K15837 G-protein signaling modulator 2	7295086_1/0.0/[O] KOG0548 Molecular co-chaperone STI1	K1RD74/0.0/K1RD74_CRAGI Tetratricopeptide repeat protein 28 OS=Crassostrea gigas OX=29159 GN=CGI_10025068 PE=4 SV=1	PS50293/81.448/TPR repeat region circular profile.	3|IPR013026; Tetratricopeptide repeat-containing domain|IPR019734; Tetratricopeptide repeat|IPR024983; CHAT domain	molecular_function:GO:0005515//protein binding;
525_1	25.28	NA	35028.8	AGAGSETHSYTTVFHVYR;SGYEINPEAAIK;SIPTEDVLAILDGHMK;SSFFNTLDTSLSSSDAVK;TFLSTDVK;VLESQIHK	1;1;1;1;1;1	6	6	0.2572	29724;20933;28079;29213;11033;11986	1.41537e+06	58973.9	OPL32633.1/3.74874e-56/hypothetical protein AM593_06913, partial [Mytilus galloprovincialis]	Q8BV66/1e-28/IFI44_MOUSE Interferon-induced protein 44 OS=Mus musculus OX=10090 GN=Ifi44 PE=2 SV=1	NA	Hs5803027/2e-29/[Z] LSE2920 H Interferon-induced, hepatitis C-associated microtubular aggregate protein	A0A194AMN7/0.0/A0A194AMN7_PINFU Uncharacterized protein OS=Pinctada fucata OX=50426 PE=4 SV=1	PTHR14241/3.4E-54/--	NA	NA
660_1	3.05726	NA	108335	YEDTGNNNQNSNIPGK	1	1	1	0.0163	28256	0	0	XP_011450877.1/0/PREDICTED: ataxin-2-like protein isoform X1 [Crassostrea gigas]	Q99700/9e-58/ATX2_HUMAN Ataxin-2 OS=Homo sapiens OX=9606 GN=ATXN2 PE=1 SV=2	NA	Hs4506795/4e-58/[A] KOG2375 Protein interacting with poly(A)-binding protein	K1QE15/0.0/K1QE15_CRAGI Ataxin-2 OS=Crassostrea gigas OX=29159 GN=CGI_10018768 PE=4 SV=1	PF14438/8.4E-19/Ataxin 2 SM domain	2|IPR009604; LsmAD domain|IPR025852; Ataxin 2, SM domain	NA
353_1	16.0128	NA	32685.5	EAGDVCYADVYK;GPPFCFIEFEDPR;SHEAETSYIR;VLVSGLPTTGSWQDLK	1;1;1;1	4	4	0.1759	23430;27035;18251;27793	20706.4	1150.36	XP_022342998.1/2.62568e-103/serine/arginine-rich splicing factor 1A-like [Crassostrea virginica]	Q5ZML3/1e-83/SRSF1_CHICK Serine/arginine-rich splicing factor 1 OS=Gallus gallus OX=9031 GN=SRSF1 PE=1 SV=3	bter:100647824/7e-100/serine/arginine-rich splicing factor 1B; K12890 splicing factor, arginine/serine-rich 1	7300132/4e-84/[A] KOG0105 Alternative splicing factor ASF/SF2 (RRM superfamily)	A0A154PMI8/8e-99/A0A154PMI8_DUFNO Serine/arginine-rich splicing factor 1 OS=Dufourea novaeangliae OX=178035 GN=WN55_05500 PE=4 SV=1	PTHR43933/2.7E-100/--	1|IPR000504; RNA recognition motif domain	molecular_function:GO:0003676//nucleic acid binding;molecular_function:GO:0003723//RNA binding;
812_1	3.217	NA	39095.5	VSEDLTER	1	1	1	0.0227	11882	773682	32236.7	XP_022104271.1/9.0019e-146/prohibitin-like [Acanthaster planci]	P84173/3e-143/PHB_CHICK Prohibitin OS=Gallus gallus OX=9031 GN=PHB PE=1 SV=1	aplc:110986594/1e-146/prohibitin-like; K17080 prohibitin 1	Hs4505773/4e-142/[O] KOG3083 Prohibitin	A0A2T7PYV8/1e-146/A0A2T7PYV8_POMCA Uncharacterized protein OS=Pomacea canaliculata OX=400727 GN=C0Q70_01220 PE=4 SV=1	PTHR23222:SF0/1.1E-131/--	2|IPR000163; Prohibitin|IPR001107; Band 7 domain	cellular_component:GO:0016020//membrane;cellular_component:GO:0016020//membrane;
792_1	7.35048	NA	114543	DFESQIQEYR;DMSSVLTDFEDLGK	1;1	2	2	0.0242	21503;26519	0	0	EKC18987.1/0/Eukaryotic translation initiation factor 3 subunit C [Crassostrea gigas]	Q6PFQ2/0.0/EIF3C_DANRE Eukaryotic translation initiation factor 3 subunit C OS=Danio rerio OX=7955 GN=eif3c PE=1 SV=1	crg:105343479/0.0/eukaryotic translation initiation factor 3 subunit C-like isoform X1; K03252 translation initiation factor 3 subunit C	Hs4503525/0.0/[J] KOG1076 Translation initiation factor 3, subunit c (eIF-3c)	K1P5V7/0.0/K1P5V7_CRAGI Eukaryotic translation initiation factor 3 subunit C OS=Crassostrea gigas OX=29159 GN=CGI_10010150 PE=3 SV=1	PS50250/26.664/PCI domain profile.	2|IPR000717; Proteasome component (PCI) domain|IPR008905; Eukaryotic translation initiation factor 3 subunit C, N-terminal domain	biological_process:GO:0006413//translational initiation;cellular_component:GO:0005852//eukaryotic translation initiation factor 3 complex;molecular_function:GO:0003743//translation initiation factor activity;GO:0031369//translation initiation factor binding;
678_1	2.39125	NA	348943	QEYLVYITKMGAIGLSLGDIESSQHSMFPLSSLSNIMDLDFDIDNR	1	1	1	0.0148	34178	0	0	XP_013077212.1/0/PREDICTED: low-density lipoprotein receptor-related protein 2-like [Biomphalaria glabrata]	P98158/0.0/LRP2_RAT Low-density lipoprotein receptor-related protein 2 OS=Rattus norvegicus OX=10116 GN=Lrp2 PE=1 SV=1	lak:106171749/0.0/low-density lipoprotein receptor-related protein 2-like; K06233 low density lipoprotein-related protein 2	7291057/0.0/[T] KOG1215 Low-density lipoprotein receptors containing Ca2+-binding EGF-like domains	A0A2C9KAN0/0.0/A0A2C9KAN0_BIOGL Uncharacterized protein OS=Biomphalaria glabrata OX=6526 GN=106063406 PE=4 SV=1	PS01209/-/LDL-receptor class A (LDLRA) domain signature.	9|IPR000033; LDLR class B repeat|IPR000152; EGF-type aspartate/asparagine hydroxylation site|IPR000742; EGF-like domain|IPR001881; EGF-like calcium-binding domain|IPR002172; Low-density lipoprotein (LDL) receptor class A repeat|IPR013032; EGF-like, conserved site|IPR018097; EGF-like calcium-binding, conserved site|IPR023415; Low-density lipoprotein (LDL) receptor class A, conserved site|IPR026823…	molecular_function:GO:0005509//calcium ion binding;GO:0005515//protein binding;cellular_component:GO:0016021//integral component of membrane;molecular_function:GO:0005509//calcium ion binding;
398_1	2.1655	NA	46229.7	WLITQR	1	1	1	0.0154	8977	809429	38544.2	XP_021370805.1/3.88575e-176/innexin unc-9-like isoform X2 [Mizuhopecten yessoensis] &gt;OWF42090.1 Innexin unc-9 [Mizuhopecten yessoensis]	O01393/2e-84/UNC9_CAEEL Innexin unc-9 OS=Caenorhabditis elegans OX=6239 GN=unc-9 PE=2 SV=1	myi:110461593/5e-176/innexin unc-9-like isoform X1; K22037 innexin	CE25779/2e-85/[W] TWOG0193 Innexin-type channels	A0A210Q015/7e-176/A0A210Q015_MIZYE Innexin OS=Mizuhopecten yessoensis OX=6573 GN=inx PE=3 SV=1	PTHR11893/7.5E-114/--	1|IPR000990; Innexin	NA
375_1	4.50075	NA	15647	VEESSGGTNDVESR	1	1	1	0.1007	24915	0	0	XP_022335156.1/1.77507e-58/protein phosphatase 1 regulatory subunit 21-like isoform X1 [Crassostrea virginica]	Q5ZL12/1e-33/PPR21_CHICK Protein phosphatase 1 regulatory subunit 21 OS=Gallus gallus OX=9031 GN=PPP1R21 PE=2 SV=1	myi:110450459/4e-52/protein phosphatase 1 regulatory subunit 21-like isoform X1; K17562 protein phosphatase 1 regulatory subunit 21	Hs22042901/2e-34/[S] KOG4421 Uncharacterized conserved protein	A0A3L5TSD0/1e-55/A0A3L5TSD0_MYTGA Uncharacterized protein (Fragment) OS=Mytilus galloprovincialis OX=29158 GN=AM593_03471 PE=4 SV=1	PTHR21448/3.3E-38/--	1|IPR019348; Uncharacterised domain KLRAQ/TTKRSYEDQ, C-terminal	NA
69_1	9.00149	NA	71003.8	ALDEFYDK;NIISFYDMAR	1;1	2	2	0.0283	13007;19272	2.12253e+07	505363	XP_019920203.1/0/PREDICTED: V-type proton ATPase catalytic subunit A [Crassostrea gigas] &gt;EKC18221.1 V-type proton ATPase catalytic subunit A [Crassostrea gigas]	P50516/0.0/VATA_MOUSE V-type proton ATPase catalytic subunit A OS=Mus musculus OX=10090 GN=Atp6v1a PE=1 SV=2	crg:105321678/0.0/V-type proton ATPase catalytic subunit A; K02145 V-type H+-transporting ATPase subunit A [EC:7.1.2.2]	Hs19913424/0.0/[C] KOG1352 Vacuolar H+-ATPase V1 sector, subunit A	K1Q9V3/0.0/K1Q9V3_CRAGI V-type proton ATPase catalytic subunit A OS=Crassostrea gigas OX=29159 GN=CGI_10014151 PE=3 SV=1	PTHR43607:SF4/0.0/--	5|IPR000194; ATPase, F1/V1/A1 complex, alpha/beta subunit, nucleotide-binding domain|IPR004100; ATPase, F1/V1/A1 complex, alpha/beta subunit, N-terminal domain|IPR020003; ATPase, alpha/beta subunit, nucleotide-binding domain, active site|IPR022878; V-type ATP synthase catalytic alpha chain|IPR031686; ATPsynthase alpha/beta subunit, N-terminal extension	biological_process:GO:0046034//ATP metabolic process;GO:1902600//hydrogen ion transmembrane transport;molecular_function:GO:0005524//ATP binding;biological_process:GO:0046034//ATP metabolic process;GO:0015991//ATP hydrolysis coupled proton transport;cellular_component:GO:0033180//proton-transporting V-type ATPase, V1 domain;molecular_function:GO:0005524//ATP binding;GO:0046961//proton-transportin…
359_1	9.00149	NA	101655	GFQDSMELEQTITER;MYFTAFGPILK	1;1	2	2	0.029	28517;20853	4835.19	91.2299	XP_011443992.1/0/PREDICTED: speckle targeted PIP5K1A-regulated poly(A) polymerase [Crassostrea gigas]	Q4KMD7/3e-77/STPAP_DANRE Speckle targeted PIP5K1A-regulated poly(A) polymerase OS=Danio rerio OX=7955 GN=tut1 PE=2 SV=1	crg:105339907/0.0/speckle targeted PIP5K1A-regulated poly(A) polymerase; K18709 speckle targeted PIP5K1A-regulated poly(A) polymerase [EC:2.7.7.19 2.7.7.52]	HsM8922454/8e-47/[D] KOG2277 S-M checkpoint control protein CID1 and related nucleotidyltransferases	K1R4B5/0.0/K1R4B5_CRAGI Poly(A) RNA polymerase, mitochondrial OS=Crassostrea gigas OX=29159 GN=CGI_10015316 PE=4 SV=1	PF00076/8.6E-11/RNA recognition motif. (a.k.a. RRM, RBD, or RNP domain)	3|IPR000504; RNA recognition motif domain|IPR002058; PAP/25A-associated|IPR034389; Speckle targeted PIP5K1A-regulated poly(A) polymerase	biological_process:GO:0006378//mRNA polyadenylation;cellular_component:GO:0005634//nucleus;molecular_function:GO:0003676//nucleic acid binding;GO:0003730//mRNA 3'-UTR binding;GO:0050265//RNA uridylyltransferase activity;biological_process:GO:0006378//mRNA polyadenylation;cellular_component:GO:0005634//nucleus;molecular_function:GO:0050265//RNA uridylyltransferase activity;GO:0003730//mRNA 3'-UTR …
348_1	4.50075	NA	58216.1	QHLQESYVNLEK	1	1	1	0.0225	25351	0	0	XP_022326820.1/9.6819e-166/LOW QUALITY PROTEIN: abl interactor 1-like [Crassostrea virginica]	P62484/4e-62/ABI2_MOUSE Abl interactor 2 OS=Mus musculus OX=10090 GN=Abi2 PE=1 SV=1	salp:111970930/3e-62/abl interactor 2 isoform X1; K05751 abl interactor 2	Hs4885611/2e-64/[TZ] KOG2546 Abl interactor ABI-1, contains SH3 domain	K1QRH6/9e-132/K1QRH6_CRAGI Uncharacterized protein OS=Crassostrea gigas OX=29159 GN=CGI_10016657 PE=4 SV=1	PTHR10460/1.9E-126/--	4|IPR001452; SH3 domain|IPR012849; Abl-interactor, homeo-domain homologous domain|IPR028457; ABI family|IPR036993; ABL interactor 2	biological_process:GO:0008154//actin polymerization or depolymerization;molecular_function:GO:0005515//protein binding;
240_1	2.23364	NA	34093.8	FDEHDGPVR	1	1	1	0.0304	14828	34872.1	1937.34	XP_011420529.1/0/PREDICTED: coatomer subunit alpha [Crassostrea gigas] &gt;EKC29564.1 Coatomer subunit alpha [Crassostrea gigas]	Q27954/6e-170/COPA_BOVIN Coatomer subunit alpha OS=Bos taurus OX=9913 GN=COPA PE=1 SV=1	crg:105323219/0.0/coatomer subunit alpha; K05236 coatomer subunit alpha	Hs4758030/7e-170/[U] KOG0292 Vesicle coat complex COPI, alpha subunit	K1QET2/0.0/K1QET2_CRAGI Coatomer subunit alpha OS=Crassostrea gigas OX=29159 GN=CGI_10027347 PE=4 SV=1	PTHR19876:SF1/1.1E-177/--	4|IPR001680; WD40 repeat|IPR017986; WD40-repeat-containing domain|IPR019775; WD40 repeat, conserved site|IPR020472; G-protein beta WD-40 repeat	molecular_function:GO:0005515//protein binding;biological_process:GO:0006886//intracellular protein transport;GO:0016192//vesicle-mediated transport;cellular_component:GO:0030126//COPI vesicle coat;GO:0000139//Golgi membrane;molecular_function:GO:0005198//structural molecule activity;
870_1	4.50075	NA	26488.6	YGDVGDVYIPR	1	1	1	0.0455	19963	412234	31710.3	XP_011412825.1/4.95697e-62/PREDICTED: serine/arginine-rich splicing factor 2-like [Crassostrea gigas] &gt;XP_011416084.1 PREDICTED: serine/arginine-rich splicing factor 2 [Crassostrea gigas] &gt;EKC32256.1 Splicing factor, arginine/serine-rich 2 [Crassostrea gigas]	P30352/2e-53/SRSF2_CHICK Serine/arginine-rich splicing factor 2 OS=Gallus gallus OX=9031 GN=SRSF2 PE=2 SV=1	crg:105320028/8e-63/serine/arginine-rich splicing factor 2; K12891 splicing factor, arginine/serine-rich 2	HsM18152777/3e-19/[R] KOG0118 FOG: RRM domain	K1RDS1/9e-62/K1RDS1_CRAGI Splicing factor, arginine/serine-rich 2 OS=Crassostrea gigas OX=29159 GN=CGI_10026246 PE=4 SV=1	SM00360/2.0E-23/--	2|IPR000504; RNA recognition motif domain|IPR003954; RNA recognition motif domain, eukaryote	molecular_function:GO:0003676//nucleic acid binding;molecular_function:GO:0003723//RNA binding;
631_1	6.27427	NA	104968	ATLAYIDCSEAK;VNPSTVDLK	1;1	2	2	0.0226	22324;12413	162264	3120.46	XP_022325952.1/0/protein disulfide-isomerase A5-like isoform X1 [Crassostrea virginica]	Q2KIL5/5e-129/PDIA5_BOVIN Protein disulfide-isomerase A5 OS=Bos taurus OX=9913 GN=PDIA5 PE=2 SV=1	crg:105322791/0.0/protein disulfide-isomerase A5; K09583 protein disulfide-isomerase A5 [EC:5.3.4.1]	7298052/2e-154/[O] KOG0191 Thioredoxin/protein disulfide isomerase	K1QYJ3/0.0/K1QYJ3_CRAGI Protein disulfide-isomerase A5 OS=Crassostrea gigas OX=29159 GN=CGI_10004060 PE=3 SV=1	PS00194/-/Thioredoxin family active site.	3|IPR001073; C1q domain|IPR013766; Thioredoxin domain|IPR017937; Thioredoxin, conserved site	biological_process:GO:0045454//cell redox homeostasis;biological_process:GO:0045454//cell redox homeostasis;cellular_component:GO:0005623//cell;molecular_function:GO:0016853//isomerase activity;
598_1	2.1655	NA	20729.7	YIGENIK	1	1	1	0.0389	9331	0	0	XP_011416163.1/6.2832e-121/PREDICTED: 60S ribosome subunit biogenesis protein NIP7 homolog [Crassostrea gigas]	Q6DFH9/4e-110/NIP7_XENLA 60S ribosome subunit biogenesis protein NIP7 homolog OS=Xenopus laevis OX=8355 GN=nip7 PE=2 SV=1	crg:105320081/1e-121/60S ribosome subunit biogenesis protein NIP7 homolog; K07565 60S ribosome subunit biogenesis protein NIP7	Hs7705437/7e-107/[J] KOG3492 Ribosome biogenesis protein NIP7	A0A210PV11/1e-115/A0A210PV11_MIZYE 60S ribosome subunit biogenesis protein NIP7 homolog OS=Mizuhopecten yessoensis OX=6573 GN=KP79_PYT21649 PE=3 SV=1	PTHR23415:SF4/5.5E-100/--	2|IPR002478; PUA domain|IPR005155; Ribosome biogenesis factor NIP7-like	molecular_function:GO:0003723//RNA binding;biological_process:GO:0042255//ribosome assembly;cellular_component:GO:0005634//nucleus;molecular_function:GO:0003723//RNA binding;
789_1	4.50075	NA	99131.5	GALLEVLHQELHR	1	1	1	0.0148	25852	0	0	OWF41221.1/0/Rap1 GTPase-activating protein 1 [Mizuhopecten yessoensis]	P47736/3e-141/RPGP1_HUMAN Rap1 GTPase-activating protein 1 OS=Homo sapiens OX=9606 GN=RAP1GAP PE=1 SV=2	myi:110462783/0.0/rap1 GTPase-activating protein 1-like isoform X1; K17700 RAP1 GTPase activating protein 1	CE24996/3e-156/[T] KOG3686 Rap1-GTPase-activating protein (Rap1GAP)	A0A210PXL0/0.0/A0A210PXL0_MIZYE Rap1 GTPase-activating protein 1 OS=Mizuhopecten yessoensis OX=6573 GN=KP79_PYT21401 PE=4 SV=1	PS00478/-/LIM zinc-binding domain signature.	3|IPR000331; Rap GTPase activating protein domain|IPR001781; Zinc finger, LIM-type|IPR003109; GoLoco motif	biological_process:GO:0051056//regulation of small GTPase mediated signal transduction;molecular_function:GO:0005096//GTPase activator activity;GO:0030695//GTPase regulator activity;
527_1	2.44735	NA	18738.9	GCGDLETLR	1	1	1	0.0545	13489	0	0	AET13645.1/1.77662e-50/lysozyme [Cyclina sinensis]	P86383/3e-52/LYS_MERLU Lysozyme OS=Meretrix lusoria OX=74491 PE=1 SV=1	NA	NA	G9BNP4/3e-50/G9BNP4_CYCSN Lysozyme OS=Cyclina sinensis OX=120566 PE=4 SV=1	PTHR11195/1.9E-42/--	1|IPR008597; Invertebrate-type lysozyme	molecular_function:GO:0003796//lysozyme activity;
371_1	4.50075	NA	17777.2	LVGVGVEEFGVEDFVK	1	1	1	0.0982	27947	0	0	OWF43096.1/1.37234e-70/Prostamide/prostaglandin F synthase [Mizuhopecten yessoensis]	Q9DB60/4e-37/PXL2B_MOUSE Prostamide/prostaglandin F synthase OS=Mus musculus OX=10090 GN=Prxl2b PE=1 SV=1	myi:110460228/2e-70/prostamide/prostaglandin F synthase-like; K15717 prostamide/prostaglandin F2alpha synthase [EC:1.11.1.20]	Hs20535797/7e-36/[S] KOG4498 Uncharacterized conserved protein	A0A210Q2Y2/3e-70/A0A210Q2Y2_MIZYE Prostamide/prostaglandin F synthase OS=Mizuhopecten yessoensis OX=6573 GN=KP79_PYT21609 PE=4 SV=1	PTHR28630:SF7/2.8E-44/--	1|IPR032801; Peroxiredoxin-like FAM213/AAED1	NA
717_1	2.37455	NA	55560.4	EFEVYGPVR	1	1	1	0.0191	15529	726768	25061	XP_022331300.1/3.08512e-80/LOW QUALITY PROTEIN: U1 small nuclear ribonucleoprotein 70 kDa-like [Crassostrea virginica]	P17133/3e-62/RU17_DROME U1 small nuclear ribonucleoprotein 70 kDa OS=Drosophila melanogaster OX=7227 GN=snRNP-U1-70K PE=1 SV=2	myi:110450268/2e-80/U1 small nuclear ribonucleoprotein 70 kDa-like; K11093 U1 small nuclear ribonucleoprotein 70kDa	7297205/1e-62/[A] KOG0113 U1 small nuclear ribonucleoprotein (RRM superfamily)	A0A0V1EVF3/2e-83/A0A0V1EVF3_TRIPS U1 small nuclear ribonucleoprotein 70 kDa OS=Trichinella pseudospiralis OX=6337 GN=SNRNP70 PE=4 SV=1	PTHR13952:SF5/1.6E-101/--	2|IPR000504; RNA recognition motif domain|IPR022023; U1 small nuclear ribonucleoprotein of 70kDa N-terminal	molecular_function:GO:0003676//nucleic acid binding;
143_1	4.50075	NA	102582	SYEEIAK	1	1	1	0.0077	9374	292684	5853.69	XP_022341448.1/5.12766e-159/nuclear receptor subfamily 1 group D member 2-like isoform X2 [Crassostrea virginica]	P22448/1e-36/RARB_CHICK Retinoic acid receptor beta OS=Gallus gallus OX=9031 GN=RARB PE=2 SV=2	myi:110447864/8e-95/vitamin D3 receptor-like isoform X1; K08532 RAR-related orphan receptor alpha	Hs14916494/1e-35/[T] KOG3575 FOG: Hormone receptors	K1QG83/5e-147/K1QG83_CRAGI Bile acid receptor OS=Crassostrea gigas OX=29159 GN=CGI_10006761 PE=3 SV=1	PR00047/2.9E-14/C4-type steroid receptor zinc finger signature	3|IPR000536; Nuclear hormone receptor, ligand-binding domain|IPR001628; Zinc finger, nuclear hormone receptor-type|IPR001723; Nuclear hormone receptor	biological_process:GO:0006355//regulation of transcription, DNA-templated;cellular_component:GO:0005634//nucleus;molecular_function:GO:0003677//DNA binding;GO:0003700//DNA binding transcription factor activity;GO:0003707//steroid hormone receptor activity;GO:0008270//zinc ion binding;GO:0043565//sequence-specific DNA binding;
499_1	2.23364	NA	42501.2	DVEDVFEPYGR	1	1	1	0.0289	21756	107710	5385.5	XP_014789154.1/8.6302e-49/PREDICTED: probable splicing factor, arginine/serine-rich 5 isoform X1 [Octopus bimaculoides] &gt;KOF64694.1 hypothetical protein OCBIM_22016929mg [Octopus bimaculoides]	Q08170/8e-15/SRSF4_HUMAN Serine/arginine-rich splicing factor 4 OS=Homo sapiens OX=9606 GN=SRSF4 PE=1 SV=2	obi:106882865/1e-49/serine/arginine-rich splicing factor 6-like; K12896 splicing factor, arginine/serine-rich 7	Hs21361282/3e-15/[A] KOG0106 Alternative splicing factor SRp55/B52/SRp75 (RRM superfamily)	A0A0L8FJW2/2e-48/A0A0L8FJW2_OCTBM Uncharacterized protein OS=Octopus bimaculoides OX=37653 GN=OCBIM_22016929mg PE=4 SV=1	PS50102/15.596/Eukaryotic RNA Recognition Motif (RRM) profile.	1|IPR000504; RNA recognition motif domain	molecular_function:GO:0003676//nucleic acid binding;molecular_function:GO:0003723//RNA binding;GO:0008270//zinc ion binding;
3_1	4.50075	NA	50073.6	AFVHWYVGEGMEEGEFSEAR;AVCMLSNTTAIAEAWAR;AVFVDLEPTVVDEVR;EIVDLVLDR;FDLMYAK;LIGQIVSSITASLR;LSVDYGK;QLFHPEQLITGK;TIGGGDDSFNTFFSETGAGK;TIQFVDWCPTGFK	0;0;0;0;0;0;0;1;0;0	1	3	0.2971	31430;31486;31487;29059;28942;28943;27673;14844;10488;24815;8305;23901;23528;23900;29923;26900	249636	11347.1	XP_011428863.1/0/PREDICTED: tubulin alpha-1A chain [Crassostrea gigas] &gt;XP_019635977.1 PREDICTED: tubulin alpha-1A chain-like [Branchiostoma belcheri] &gt;XP_022306616.1 tubulin alpha-1A chain [Crassostrea virginica]	P68370/0.0/TBA1A_RAT Tubulin alpha-1A chain OS=Rattus norvegicus OX=10116 GN=Tuba1a PE=1 SV=1	crg:105329348/0.0/tubulin alpha-1A chain; K07374 tubulin alpha	Hs17986283/0.0/[Z] KOG1376 Alpha tubulin	A0A194AM95/0.0/A0A194AM95_PINFU Tubulin alpha chain OS=Pinctada fucata OX=50426 PE=3 SV=1	PR01161/1.1E-90/Tubulin signature	5|IPR000217; Tubulin|IPR002452; Alpha tubulin|IPR003008; Tubulin/FtsZ, GTPase domain|IPR017975; Tubulin, conserved site|IPR018316; Tubulin/FtsZ, 2-layer sandwich domain	biological_process:GO:0007017//microtubule-based process;cellular_component:GO:0005874//microtubule;molecular_function:GO:0003924//GTPase activity;GO:0005200//structural constituent of cytoskeleton;GO:0005525//GTP binding;biological_process:GO:0007017//microtubule-based process;cellular_component:GO:0005874//microtubule;GO:0005737//cytoplasm;molecular_function:GO:0005200//structural constituent o…
695_1	3.217	NA	277748	WLLVGAPR	1	1	1	0.0032	11061	0	0	XP_011415748.2/2.77587e-169/PREDICTED: integrin alpha-6 [Crassostrea gigas]	Q00651/7e-69/ITA4_MOUSE Integrin alpha-4 OS=Mus musculus OX=10090 GN=Itga4 PE=1 SV=1	myi:110454033/6e-152/integrin alpha-9-like isoform X1; K06585 integrin alpha 9	Hs11321595/2e-67/[W] KOG3637 Vitronectin receptor, alpha subunit	A0A210QG51/1e-152/A0A210QG51_MIZYE Integrin alpha-9 OS=Mizuhopecten yessoensis OX=6573 GN=KP79_PYT19349 PE=3 SV=1	PR01185/3.4E-41/Integrin alpha subunit signature	5|IPR000413; Integrin alpha chain|IPR013517; FG-GAP repeat|IPR013519; Integrin alpha beta-propellor|IPR013649; Integrin alpha-2|IPR018184; Integrin alpha chain, C-terminal cytoplasmic region, conserved site	biological_process:GO:0007155//cell adhesion;cellular_component:GO:0008305//integrin complex;
16_1	2.37455	NA	26762.9	ECPAIDYTR	1	1	1	0.0386	16379	81054.6	5065.91	XP_011455232.1/8.06533e-156/PREDICTED: MOB-like protein phocein [Crassostrea gigas] &gt;EKC32951.1 Mps one binder kinase activator-like 3 [Crassostrea gigas]	Q9QYW3/6e-136/PHOCN_RAT MOB-like protein phocein OS=Rattus norvegicus OX=10116 GN=Mob4 PE=1 SV=1	ecb:100070523/1e-134/MOB-like protein phocein isoform X1; K04078 chaperonin GroES	Hs14730060/3e-136/[D] KOG1852 Cell cycle-associated protein	K1RFQ3/1e-155/K1RFQ3_CRAGI Mps one binder kinase activator-like 3 OS=Crassostrea gigas OX=29159 GN=CGI_10024744 PE=4 SV=1	PTHR22599:SF1/3.4E-111/--	1|IPR005301; MOB kinase activator family	molecular_function:GO:0016301//kinase activity;
211_1	4.50075	NA	68598.3	IPVISVVGNDAGWTQIER	1	1	1	0.0286	29513	0	0	XP_022322803.1/0/acetolactate synthase-like protein [Crassostrea virginica]	Q6NV04/0.0/ILVBL_DANRE Acetolactate synthase-like protein OS=Danio rerio OX=7955 GN=ilvbl PE=2 SV=1	crg:105336349/0.0/acetolactate synthase-like protein; K11259 acetolactate synthase-like protein [EC:2.2.1.-]	Hs21361361/0.0/[EH] KOG1185 Thiamine pyrophosphate-requiring enzyme	K1QG61/0.0/K1QG61_CRAGI Acetolactate synthase-like protein OS=Crassostrea gigas OX=29159 GN=CGI_10016018 PE=3 SV=1	PF02776/2.6E-51/Thiamine pyrophosphate enzyme, N-terminal TPP binding domain	4|IPR000399; TPP-binding enzyme, conserved site|IPR011766; Thiamine pyrophosphate enzyme, C-terminal TPP-binding|IPR012000; Thiamine pyrophosphate enzyme, central domain|IPR012001; Thiamine pyrophosphate enzyme, N-terminal TPP-binding domain	molecular_function:GO:0000287//magnesium ion binding;GO:0003824//catalytic activity;GO:0030976//thiamine pyrophosphate binding;
418_1	2.1655	NA	42232.5	VSLSEQR	1	1	1	0.0191	9004	24187.7	1422.8	XP_022312935.1/5.84993e-170/LOW QUALITY PROTEIN: peroxisomal membrane protein PEX16-like [Crassostrea virginica]	Q4QRH7/2e-91/PEX16_DANRE Peroxisomal membrane protein PEX16 OS=Danio rerio OX=7955 GN=pex16 PE=2 SV=1	crg:105325205/8e-168/peroxisomal membrane protein PEX16-like; K13335 peroxin-16	Hs4758898/3e-87/[U] KOG4546 Peroxisomal biogenesis protein (peroxin 16)	V4AKC8/4e-119/V4AKC8_LOTGI Peroxisomal membrane protein PEX16 OS=Lottia gigantea OX=225164 GN=LOTGIDRAFT_208740 PE=3 SV=1	PTHR13299/2.5E-98/--	1|IPR013919; Peroxisome membrane protein, Pex16	NA
655_1	2.25036	NA	52751.6	VDYPEDVK	1	1	1	0.0167	12235	160542	5016.94	XP_011435389.1/0/PREDICTED: alanine aminotransferase 2 [Crassostrea gigas]	Q6GM82/0.0/ALAT2_XENLA Alanine aminotransferase 2 OS=Xenopus laevis OX=8355 GN=gpt2 PE=2 SV=1	crg:105333876/0.0/alanine aminotransferase 2; K00814 alanine transaminase [EC:2.6.1.2]	Hs19263340/0.0/[E] KOG0258 Alanine aminotransferase	K1RGF4/0.0/K1RGF4_CRAGI Alanine aminotransferase 2 OS=Crassostrea gigas OX=29159 GN=CGI_10014208 PE=4 SV=1	PTHR11751/5.6E-216/--	1|IPR004839; Aminotransferase, class I/classII	biological_process:GO:0009058//biosynthetic process;molecular_function:GO:0030170//pyridoxal phosphate binding;biological_process:GO:0009058//biosynthetic process;molecular_function:GO:0003824//catalytic activity;GO:0030170//pyridoxal phosphate binding;
649_1	2.08266	NA	37880.4	LVEPDNLR	1	1	1	0.0236	12028	707785	37251.8	XP_021347637.1/6.38976e-93/testis-expressed protein 264-like [Mizuhopecten yessoensis] &gt;OWF53200.1 hypothetical protein KP79_PYT11523 [Mizuhopecten yessoensis]	Q9Y6I9/5e-51/TX264_HUMAN Testis-expressed protein 264 OS=Homo sapiens OX=9606 GN=TEX264 PE=1 SV=1	cel:CELE_T24H7.5/2e-09/tat-4; Phospholipid-transporting ATPase; K01530 phospholipid-translocating ATPase [EC:7.6.2.1]	CE21204/5e-11/[R] KOG0206 P-type ATPase	A0A210QWR5/1e-92/A0A210QWR5_MIZYE Uncharacterized protein OS=Mizuhopecten yessoensis OX=6573 GN=KP79_PYT11523 PE=4 SV=1	PTHR15949/3.7E-75/--	NA	NA
913_1	4.50075	NA	45563.9	YGEVITIDGAK	1	1	1	0.026	17532	147872	5687.4	XP_022301260.1/9.07331e-70/transforming growth factor-beta-induced protein ig-h3-like [Crassostrea virginica]	Q15582/5e-34/BGH3_HUMAN Transforming growth factor-beta-induced protein ig-h3 OS=Homo sapiens OX=9606 GN=TGFBI PE=1 SV=1	lak:106177633/1e-68/transforming growth factor-beta-induced protein ig-h3; K19519 transforming growth factor-beta-induced protein	Hs4507467/2e-34/[MW] KOG1437 Fasciclin and related adhesion glycoproteins	A0A3S1BX52/5e-70/A0A3S1BX52_ELYCH Uncharacterized protein OS=Elysia chlorotica OX=188477 GN=EGW08_001212 PE=4 SV=1	PS50213/29.48/FAS1/BIgH3 domain profile.	1|IPR000782; FAS1 domain	NA
869_1	4.50075	NA	183145	EEEEAGPSTIK	1	1	1	0.0068	18174	91552.2	769.346	XP_011429735.1/0/PREDICTED: ERC protein 2 [Crassostrea gigas]	Q8IUD2/1e-154/RB6I2_HUMAN ELKS/Rab6-interacting/CAST family member 1 OS=Homo sapiens OX=9606 GN=ERC1 PE=1 SV=1	crg:105329934/0.0/ERC protein 2; K16072 ELKS/RAB6-interacting/CAST family member 1	Hs4885051/9e-162/[KLO] KOG1037 NAD+ ADP-ribosyltransferase Parp, required for poly-ADP ribosylation of nuclear proteins	K1QCT1/0.0/K1QCT1_CRAGI ELKS/RAB6-interacting/CAST family member 1 OS=Crassostrea gigas OX=29159 GN=CGI_10006173 PE=4 SV=1	PF05406/3.2E-24/WGR domain	5|IPR004102; Poly(ADP-ribose) polymerase, regulatory domain|IPR008893; WGR domain|IPR012317; Poly(ADP-ribose) polymerase, catalytic domain|IPR019323; Active zone protein ELKS|IPR031275; Poly [ADP-ribose] polymerase 3	biological_process:GO:0006302//double-strand break repair;GO:0006471//protein ADP-ribosylation;cellular_component:GO:0048786//presynaptic active zone;molecular_function:GO:0003950//NAD+ ADP-ribosyltransferase activity;
182_1	4.50075	NA	17663.3	QVDPYQVSELTNLQSIK	1	1	1	0.1076	29573	0	0	XP_009053899.1/3.32943e-56/hypothetical protein LOTGIDRAFT_215045 [Lottia gigantea] &gt;ESO95390.1 hypothetical protein LOTGIDRAFT_215045 [Lottia gigantea]	Q5PQR8/5e-35/TPRKB_RAT EKC/KEOPS complex subunit Tprkb OS=Rattus norvegicus OX=10116 GN=Tprkb PE=2 SV=1	myi:110453233/1e-52/EKC/KEOPS complex subunit Tprkb-like; K15901 EKC/KEOPS complex subunit CGI121/TPRKB	Hs7705590/3e-33/[S] KOG4066 Cell growth regulatory protein CGR11	V4AKZ5/6e-56/V4AKZ5_LOTGI Uncharacterized protein OS=Lottia gigantea OX=225164 GN=LOTGIDRAFT_215045 PE=3 SV=1	PTHR15840/2.6E-42/--	1|IPR013926; CGI121/TPRKB	cellular_component:GO:0005634//nucleus;
887_1	7.71775	NA	50239.4	ALESTIAPIVIFATNR;AVLLAGPPGTGK	1;1	2	2	0.0614	27880;15092	0	0	XP_011412783.1/0/PREDICTED: ruvB-like 1 [Crassostrea gigas]	Q9DE26/0.0/RUVB1_XENLA RuvB-like 1 OS=Xenopus laevis OX=8355 GN=ruvbl1 PE=2 SV=1	crg:105317753/0.0/ruvB-like 1; K04499 RuvB-like protein 1 (pontin 52)	Hs4506753/0.0/[L] KOG1942 DNA helicase, TBP-interacting protein	A0A210PMW5/0.0/A0A210PMW5_MIZYE RuvB-like helicase OS=Mizuhopecten yessoensis OX=6573 GN=KP79_PYT12091 PE=3 SV=1	PTHR11093:SF6/3.5E-253/--	4|IPR003593; AAA+ ATPase domain|IPR010339; TIP49, C-terminal|IPR027238; RuvB-like|IPR037938; RuvB-like helicase 1	cellular_component:GO:0031011//Ino80 complex;GO:0035267//NuA4 histone acetyltransferase complex;GO:0097255//R2TP complex;molecular_function:GO:0003678//DNA helicase activity;GO:0005524//ATP binding;GO:0043141//ATP-dependent 5'-3' DNA helicase activity;
142_1	3.05726	NA	26598.4	GVNTFSPEGR	1	1	1	0.0415	14568	1.11234e+06	85564.4	XP_021360390.1/1.72515e-173/proteasome subunit alpha type-5 [Mizuhopecten yessoensis]	Q9Z2U1/5e-156/PSA5_MOUSE Proteasome subunit alpha type-5 OS=Mus musculus OX=10090 GN=Psma5 PE=1 SV=1	myi:110454910/3e-174/proteasome subunit alpha type-5; K02729 20S proteasome subunit alpha 5 [EC:3.4.25.1]	Hs4506187/1e-154/[O] KOG0176 20S proteasome, regulatory subunit alpha type PSMA5/PUP2	A0A210R4I2/6e-172/A0A210R4I2_MIZYE Proteasome endopeptidase complex OS=Mizuhopecten yessoensis OX=6573 GN=KP79_PYT11666 PE=3 SV=1	PS00388/-/Proteasome alpha-type subunits signature.	3|IPR000426; Proteasome alpha-subunit, N-terminal domain|IPR001353; Proteasome, subunit alpha/beta|IPR023332; Proteasome alpha-type subunit	biological_process:GO:0006511//ubiquitin-dependent protein catabolic process;GO:0051603//proteolysis involved in cellular protein catabolic process;cellular_component:GO:0005839//proteasome core complex;GO:0019773//proteasome core complex, alpha-subunit complex;molecular_function:GO:0004175//endopeptidase activity;GO:0004298//threonine-type endopeptidase activity;biological_process:GO:0043161//pr…
61_1	4.50075	NA	126453	LELENFYLDK	1	1	1	0.0089	20745	40480.6	642.549	XP_022302133.1/0/SLIT-ROBO Rho GTPase-activating protein 1-like isoform X9 [Crassostrea virginica]	Q7Z6B7/0.0/SRGP1_HUMAN SLIT-ROBO Rho GTPase-activating protein 1 OS=Homo sapiens OX=9606 GN=SRGAP1 PE=1 SV=1	myi:110451884/0.0/SLIT-ROBO Rho GTPase-activating protein 1-like isoform X1; K07526 SLIT-ROBO Rho GTPase activating protein	Hs16163690/0.0/[Z] KOG3565 Cdc42-interacting protein CIP4	A0A210QKV6/0.0/A0A210QKV6_MIZYE SLIT-ROBO Rho GTPase-activating protein 1 OS=Mizuhopecten yessoensis OX=6573 GN=KP79_PYT11807 PE=4 SV=1	SM00055/1.2E-9/--	4|IPR000198; Rho GTPase-activating protein domain|IPR001060; FCH domain|IPR001452; SH3 domain|IPR031160; F-BAR domain	biological_process:GO:0007165//signal transduction;molecular_function:GO:0005515//protein binding;
452_1	4.50075	NA	45668.4	VGGIVETNRPDSK	1	1	1	0.0334	23014	0	0	XP_011434053.1/0/PREDICTED: 26S proteasome non-ATPase regulatory subunit 6 [Crassostrea gigas] &gt;EKC40462.1 26S proteasome non-ATPase regulatory subunit 6 [Crassostrea gigas]	Q15008/0.0/PSMD6_HUMAN 26S proteasome non-ATPase regulatory subunit 6 OS=Homo sapiens OX=9606 GN=PSMD6 PE=1 SV=1	crg:105332983/0.0/26S proteasome non-ATPase regulatory subunit 6; K03037 26S proteasome regulatory subunit N7	Hs7661914/0.0/[O] KOG0687 26S proteasome regulatory complex, subunit RPN7/PSMD6	K1QUE6/0.0/K1QUE6_CRAGI 26S proteasome non-ATPase regulatory subunit 6 OS=Crassostrea gigas OX=29159 GN=CGI_10008786 PE=4 SV=1	PS50250/24.464/PCI domain profile.	3|IPR000717; Proteasome component (PCI) domain|IPR019585; 26S proteasome regulatory subunit Rpn7/COP9 signalosome complex subunit 1|IPR035268; 26S Proteasome non-ATPase regulatory subunit 6	molecular_function:GO:0030234//enzyme regulator activity;cellular_component:GO:0000502//proteasome complex;molecular_function:GO:0030234//enzyme regulator activity;
71_1	4.50075	NA	50566.8	HINSELER	1	1	1	0.0178	12921	135917	5033.98	OWF38059.1/6.68599e-77/Leucine-rich repeat-containing protein 59 [Mizuhopecten yessoensis]	Q8AVS8/2e-67/LRC59_XENLA Leucine-rich repeat-containing protein 59 OS=Xenopus laevis OX=8355 GN=lrrc59 PE=2 SV=1	lak:106169791/8e-13/uncharacterized protein LOC106169791; K08800 NUAK family, SNF1-like kinase [EC:2.7.11.1]	CE28340/2e-31/[S] KOG0473 Leucine-rich repeat protein	A0A210PNH5/1e-76/A0A210PNH5_MIZYE Leucine-rich repeat-containing protein 59 OS=Mizuhopecten yessoensis OX=6573 GN=KP79_PYT12814 PE=4 SV=1	PF13855/2.5E-8/Leucine rich repeat	2|IPR001611; Leucine-rich repeat|IPR003591; Leucine-rich repeat, typical subtype	molecular_function:GO:0005515//protein binding;
95_1	2.77622	NA	30059	VFEEETDR	1	1	1	0.0304	13585	972260	64817.4	XP_019918687.1/4.0998e-87/PREDICTED: cation-dependent mannose-6-phosphate receptor [Crassostrea gigas]	Q6AY20/1e-60/MPRD_RAT Cation-dependent mannose-6-phosphate receptor OS=Rattus norvegicus OX=10116 GN=M6pr PE=1 SV=1	crg:105318065/6e-88/cation-dependent mannose-6-phosphate receptor; K10089 cation-dependent mannose-6-phosphate receptor	SPBC530.09c/3e-08/[TU] KOG4504 Cation-independent mannose-6-phosphate receptor CI-MPR	A0A210PG74/3e-81/A0A210PG74_MIZYE Cation-dependent mannose-6-phosphate receptor OS=Mizuhopecten yessoensis OX=6573 GN=KP79_PYT21521 PE=4 SV=1	PTHR15071:SF9/5.6E-75/--	2|IPR000296; Cation-dependent mannose-6-phosphate receptor|IPR028927; Mannose-6-phosphate receptor	biological_process:GO:0015761//mannose transport;cellular_component:GO:0000323//lytic vacuole;GO:0016021//integral component of membrane;molecular_function:GO:0005537//mannose binding;GO:0015578//mannose transmembrane transporter activity;cellular_component:GO:0016021//integral component of membrane;GO:0000323//lytic vacuole;molecular_function:GO:0015578//mannose transmembrane transporter activit…
241_1	3.217	NA	112723	GDGSSIVTSCR	1	1	1	0.011	16754	6.04057e+06	100676	XP_022327050.1/0/coronin-7-like [Crassostrea virginica] &gt;XP_022327051.1 coronin-7-like [Crassostrea virginica]	Q0V8F1/7e-158/CORO7_BOVIN Coronin-7 OS=Bos taurus OX=9913 GN=CORO7 PE=2 SV=1	crg:105319239/0.0/coronin-7; K18619 coronin-7	7290756/5e-161/[Z] KOG1445 Tumor-specific antigen (contains WD repeats)	K1QJF7/0.0/K1QJF7_CRAGI Coronin OS=Crassostrea gigas OX=29159 GN=CGI_10015845 PE=3 SV=1	SM00320/7.6E-4/--	6|IPR001680; WD40 repeat|IPR015048; Domain of unknown function DUF1899|IPR015505; Coronin|IPR017986; WD40-repeat-containing domain|IPR019775; WD40 repeat, conserved site|IPR027331; Coronin 7	cellular_component:GO:0005794//Golgi apparatus;molecular_function:GO:0005515//protein binding;
226_1	4.50075	NA	53417.4	NNLEFLYNK	1	1	1	0.0193	17229	190086	6554.71	XP_014768237.1/9.27539e-148/PREDICTED: tumor suppressor candidate 3-like isoform X1 [Octopus bimaculoides]	Q13454/1e-113/TUSC3_HUMAN Tumor suppressor candidate 3 OS=Homo sapiens OX=9606 GN=TUSC3 PE=1 SV=1	obi:106867772/1e-148/tumor suppressor candidate 3-like; K12669 oligosaccharyltransferase complex subunit gamma	Hs6996934/4e-111/[O] KOG2603 Oligosaccharyltransferase, gamma subunit	A0A433U1M2/3e-148/A0A433U1M2_ELYCH Uncharacterized protein OS=Elysia chlorotica OX=188477 GN=EGW08_004536 PE=4 SV=1	PTHR12692:SF1/1.3E-169/--	1|IPR021149; Oligosaccharyl transferase complex, subunit OST3/OST6	cellular_component:GO:0016021//integral component of membrane;
106_1	6.73439	NA	20773.5	ALGFEPK;EAFDLFDTDGSGTIDAK	1;1	2	2	0.1304	8033;28529	0	0	OWF37243.1/4.64354e-101/Centrin-1 [Mizuhopecten yessoensis]	Q9R1K9/1e-97/CETN2_MOUSE Centrin-2 OS=Mus musculus OX=10090 GN=Cetn2 PE=1 SV=1	myi:110440448/5e-101/caltractin; K16465 centrin-1	Hs4757974/4e-96/[ZD] KOG0028 Ca2+-binding protein (centrin/caltractin), EF-Hand superfamily protein	A0A210PL80/8e-101/A0A210PL80_MIZYE Centrin-1 OS=Mizuhopecten yessoensis OX=6573 GN=KP79_PYT12403 PE=4 SV=1	PS00018/-/EF-hand calcium-binding domain.	3|IPR000629; ATP-dependent RNA helicase DEAD-box, conserved site|IPR002048; EF-hand domain|IPR018247; EF-Hand 1, calcium-binding site	molecular_function:GO:0005509//calcium ion binding;molecular_function:GO:0005509//calcium ion binding;
898_1	4.50075	NA	25618.6	VIIDGGEFLGNLR	1	1	1	0.058	23735	0	0	XP_021341452.1/6.59482e-108/ER membrane protein complex subunit 7-like [Mizuhopecten yessoensis]	Q9NPA0/6e-65/EMC7_HUMAN ER membrane protein complex subunit 7 OS=Homo sapiens OX=9606 GN=EMC7 PE=1 SV=1	nai:NECAME_06331/1e-46/hypothetical protein; K05755 actin related protein 2/3 complex, subunit 4	Hs9910346/3e-65/[S] KOG3306 Predicted membrane protein	K1S6T6/2e-100/K1S6T6_CRAGI UPF0480 protein C15orf24-like protein OS=Crassostrea gigas OX=29159 GN=CGI_10021156 PE=4 SV=1	PTHR13605:SF4/5.4E-75/--	2|IPR019008; Domain of unknown function DUF2012|IPR039163; ER membrane protein complex subunit 7	NA
528_1	4.50075	NA	13557.5	LAHEVGWK	1	1	1	0.069	11674	25850.3	3692.9	XP_021365548.1/1.62194e-56/60S ribosomal protein L13a-like [Mizuhopecten yessoensis]	Q4R8Z2/3e-44/RL13A_MACFA 60S ribosomal protein L13a OS=Macaca fascicularis OX=9541 GN=RPL13A PE=2 SV=3	myi:110458260/3e-57/60S ribosomal protein L13a-like; K02872 large subunit ribosomal protein L13Ae	Hs6912634/2e-44/[J] KOG3204 60S ribosomal protein L13a	K1RGT9/7e-56/K1RGT9_CRAGI 60S ribosomal protein L13a OS=Crassostrea gigas OX=29159 GN=CGI_10021874 PE=3 SV=1	PTHR11545/3.5E-46/--	2|IPR005755; Ribosomal protein L13, eukaryotic/archaeal|IPR005822; Ribosomal protein L13	biological_process:GO:0006412//translation;cellular_component:GO:0005840//ribosome;GO:0015934//large ribosomal subunit;molecular_function:GO:0003735//structural constituent of ribosome;biological_process:GO:0006412//translation;cellular_component:GO:0015934//large ribosomal subunit;molecular_function:GO:0003735//structural constituent of ribosome;
496_1	2.62284	NA	28709.5	SVFPQETK	1	1	1	0.0309	11583	339589	42448.6	XP_022294027.1/3.46688e-151/peroxiredoxin-like [Crassostrea virginica] &gt;XP_022295207.1 peroxiredoxin-like [Crassostrea virginica]	Q9Z0V5/3e-122/PRDX4_RAT Peroxiredoxin-4 OS=Rattus norvegicus OX=10116 GN=Prdx4 PE=2 SV=1	crg:105338221/2e-149/peroxiredoxin-2; K03386 peroxiredoxin (alkyl hydroperoxide reductase subunit C) [EC:1.11.1.15]	Hs5453549/5e-121/[O] KOG0852 Alkyl hydroperoxide reductase, thiol specific antioxidant and related enzymes	K1QLH0/3e-148/K1QLH0_CRAGI Peroxiredoxin-4 OS=Crassostrea gigas OX=29159 GN=CGI_10024227 PE=4 SV=1	PF00578/8.2E-34/AhpC/TSA family	3|IPR000866; Alkyl hydroperoxide reductase subunit C/ Thiol specific antioxidant|IPR013766; Thioredoxin domain|IPR019479; Peroxiredoxin, C-terminal	biological_process:GO:0045454//cell redox homeostasis;GO:0055114//oxidation-reduction process;molecular_function:GO:0016209//antioxidant activity;GO:0016491//oxidoreductase activity;GO:0051920//peroxiredoxin activity;biological_process:GO:0045454//cell redox homeostasis;cellular_component:GO:0005623//cell;molecular_function:GO:0051920//peroxiredoxin activity;
135_1	3.217	NA	38517.1	IQLQDAGR	1	1	1	0.0226	10804	148190	7409.52	XP_014777613.1/4.82345e-122/PREDICTED: mitochondrial glutamate carrier 1-like [Octopus bimaculoides]	Q9H1K4/1e-94/GHC2_HUMAN Mitochondrial glutamate carrier 2 OS=Homo sapiens OX=9606 GN=SLC25A18 PE=1 SV=1	obi:106874401/7e-123/mitochondrial glutamate carrier 1-like; K15107 solute carrier family 25 (mitochondrial glutamate transporter), member 18/22	7299538/1e-100/[C] KOG0750 Mitochondrial solute carrier protein	A0A210Q1W6/2e-117/A0A210Q1W6_MIZYE Mitochondrial glutamate carrier 1 OS=Mizuhopecten yessoensis OX=6573 GN=KP79_PYT07219 PE=3 SV=1	PS50920/22.127/Solute carrier (Solcar) repeat profile.	2|IPR002067; Mitochondrial carrier protein|IPR018108; Mitochondrial substrate/solute carrier	biological_process:GO:0055085//transmembrane transport;biological_process:GO:0055085//transmembrane transport;cellular_component:GO:0016021//integral component of membrane;
787_1	9.00149	NA	59139.5	GATDNIIDDIER;LVPGAGATEVELAK	1;1	2	2	0.048	21936;22592	738608	21103.1	XP_022294447.1/0/T-complex protein 1 subunit theta-like [Crassostrea virginica]	Q6EE31/0.0/TCPQ_CHICK T-complex protein 1 subunit theta OS=Gallus gallus OX=9031 GN=CCT8 PE=1 SV=3	crg:105344544/0.0/T-complex protein 1 subunit theta isoform X2; K09500 T-complex protein 1 subunit theta	Hs6005727/0.0/[O] KOG0362 Chaperonin complex component, TCP-1 theta subunit (CCT8)	K1R0S3/0.0/K1R0S3_CRAGI T-complex protein 1 subunit theta OS=Crassostrea gigas OX=29159 GN=CGI_10002375 PE=3 SV=1	PF00118/1.1E-152/TCP-1/cpn60 chaperonin family	3|IPR002194; Chaperonin TCP-1, conserved site|IPR002423; Chaperonin Cpn60/TCP-1 family|IPR017998; Chaperone tailless complex polypeptide 1 (TCP-1)	biological_process:GO:0006457//protein folding;molecular_function:GO:0005524//ATP binding;GO:0051082//unfolded protein binding;
563_1	2.37455	NA	75090.3	NTISDISPR	1	1	1	0.0141	13061	1.68152e+06	48043.4	XP_022300437.1/2.64004e-74/uncharacterized protein LOC111108696 isoform X1 [Crassostrea virginica]	P08953/2e-13/TOLL_DROME Protein toll OS=Drosophila melanogaster OX=7227 GN=Tl PE=1 SV=1	crg:105337454/5e-72/protein toll-like; K18809 protein toll	7301502/1e-13/[T] KOG4641 FOG: Toll/interleukin receptor and related proteins containing LRR and TIR repeats	A0A210PLI9/2e-66/A0A210PLI9_MIZYE Protein toll OS=Mizuhopecten yessoensis OX=6573 GN=KP79_PYT14016 PE=4 SV=1	PS50104/11.684/TIR domain profile.	2|IPR000157; Toll/interleukin-1 receptor homology (TIR) domain|IPR001611; Leucine-rich repeat	biological_process:GO:0007165//signal transduction;molecular_function:GO:0005515//protein binding;
677_1	18.003	NA	104206	EDSYEETIR;IEVLESQVK;IQLLEEDLER;LLDENETLTK	1;1;1;1	4	4	0.0423	16860;14047;20087;17795	988691	14328.8	EKC32774.1/2.29514e-61/Tropomyosin [Crassostrea gigas]	Q95WY0/1e-59/TPM03_CRAGI Tropomyosin (Fragment) OS=Crassostrea gigas OX=29159 PE=1 SV=1	crg:105335489/3e-58/tropomyosin isoform X2; K10373 tropomyosin 1	CE29058/2e-50/[Z] KOG1003 Actin filament-coating protein tropomyosin	A0A499UBU3/3e-62/A0A499UBU3_PINFU Tropomyosin-2 OS=Pinctada fucata OX=50426 GN=tm-2 PE=2 SV=1	PF00261/7.8E-14/Tropomyosin	1|IPR000533; Tropomyosin	NA
513_1	4.50075	NA	37275.8	SQDGNSDEAAITSR	1	1	1	0.0426	24672	14186.1	834.474	XP_003218165.1/2.9828e-57/PREDICTED: MKI67 FHA domain-interacting nucleolar phosphoprotein [Anolis carolinensis]	Q6GL69/2e-52/MK67I_XENTR MKI67 FHA domain-interacting nucleolar phosphoprotein-like OS=Xenopus tropicalis OX=8364 GN=nifk PE=2 SV=1	acs:100564113/5e-58/nifk; nucleolar protein interacting with the FHA domain of MKI67; K14838 nucleolar protein 15	Hs21314753/2e-41/[R] KOG4208 Nucleolar RNA-binding protein NIFK	A0A2T7PR00/2e-64/A0A2T7PR00_POMCA Uncharacterized protein OS=Pomacea canaliculata OX=400727 GN=C0Q70_02822 PE=4 SV=1	PS50102/15.05/Eukaryotic RNA Recognition Motif (RRM) profile.	1|IPR000504; RNA recognition motif domain	molecular_function:GO:0003676//nucleic acid binding;biological_process:GO:0010923//negative regulation of phosphatase activity;cellular_component:GO:0005654//nucleoplasm;GO:0005730//nucleolus;GO:0000794//condensed nuclear chromosome;GO:0005737//cytoplasm;molecular_function:GO:0003723//RNA binding;
146_1	11.7777	NA	14037.1	DEPHIKPTL;FINYYYIQAPEAR;NNLLLACHSTNIAAQVTQGCR	1;1;1	3	3	0.3613	14156;27333;31459	178778	22347.2	XP_022287669.1/2.11531e-43/LOW QUALITY PROTEIN: mitochondrial pyruvate carrier 1-like [Crassostrea virginica]	O74847/5e-16/MPC1_SCHPO Probable mitochondrial pyruvate carrier 1 OS=Schizosaccharomyces pombe (strain 972 / ATCC 24843) OX=284812 GN=mpc1 PE=3 SV=3	crg:105331285/6e-43/mitochondrial pyruvate carrier 1-like isoform X1; K22138 mitochondrial pyruvate carrier 1	SPCC1235.11/2e-16/[S] KOG1590 Uncharacterized conserved protein	A0A3S1BR98/6e-37/A0A3S1BR98_ELYCH Mitochondrial pyruvate carrier OS=Elysia chlorotica OX=188477 GN=EGW08_005531 PE=3 SV=1	PTHR14154/2.1E-18/--	1|IPR005336; Mitochondrial pyruvate carrier	biological_process:GO:0006850//mitochondrial pyruvate transmembrane transport;cellular_component:GO:0005743//mitochondrial inner membrane;
847_1	3.05726	NA	57105.4	DGTQLICGVCGDK	1	1	1	0.0262	24128	182639	6087.98	XP_022338258.1/0/nuclear hormone receptor HR96-like isoform X3 [Crassostrea virginica]	O13124/3e-55/VDR_XENLA Vitamin D3 receptor OS=Xenopus laevis OX=8355 GN=vdr PE=2 SV=1	crg:105334314/0.0/nuclear hormone receptor HR96 isoform X1; K08539 vitamin D3 receptor	Hs5031893/5e-43/[T] KOG3575 FOG: Hormone receptors	K1Q8P9/0.0/K1Q8P9_CRAGI Vitamin D3 receptor B OS=Crassostrea gigas OX=29159 GN=CGI_10007907 PE=3 SV=1	PS00031/-/Nuclear hormones receptors DNA-binding region signature.	3|IPR000536; Nuclear hormone receptor, ligand-binding domain|IPR001628; Zinc finger, nuclear hormone receptor-type|IPR001723; Nuclear hormone receptor	biological_process:GO:0006355//regulation of transcription, DNA-templated;cellular_component:GO:0005634//nucleus;molecular_function:GO:0003677//DNA binding;GO:0003700//DNA binding transcription factor activity;GO:0003707//steroid hormone receptor activity;GO:0008270//zinc ion binding;GO:0043565//sequence-specific DNA binding;
55_1	2.37455	NA	161338	VNIDTLIDTLQR	1	1	1	0.0083	23689	19486.7	249.83	XP_011445581.1/0/PREDICTED: uncharacterized protein LOC105341005 isoform X1 [Crassostrea gigas] &gt;XP_019928023.1 PREDICTED: uncharacterized protein LOC105341005 isoform X1 [Crassostrea gigas]	P16056/3e-45/MET_MOUSE Hepatocyte growth factor receptor OS=Mus musculus OX=10090 GN=Met PE=1 SV=1	crg:105341005/0.0/uncharacterized protein LOC105341005 isoform X1; K19636 usherin	Hs19705572/1e-38/[W] KOG1836 Extracellular matrix glycoprotein Laminin subunits alpha and gamma	A0A433STR4/2e-151/A0A433STR4_ELYCH Uncharacterized protein OS=Elysia chlorotica OX=188477 GN=EGW08_019561 PE=4 SV=1	PF00053/4.5E-7/Laminin EGF domain	5|IPR000719; Protein kinase domain|IPR001245; Serine-threonine/tyrosine-protein kinase, catalytic domain|IPR002049; Laminin EGF domain|IPR002909; IPT domain|IPR008266; Tyrosine-protein kinase, active site	biological_process:GO:0006468//protein phosphorylation;molecular_function:GO:0004672//protein kinase activity;GO:0005524//ATP binding;
661_1	2.58375	NA	40594.9	GAVSIIFR	1	1	1	0.0216	9946	0	0	XP_022339394.1/0/propionyl-CoA carboxylase beta chain, mitochondrial-like isoform X1 [Crassostrea virginica]	P79384/2e-169/PCCB_PIG Propionyl-CoA carboxylase beta chain, mitochondrial OS=Sus scrofa OX=9823 GN=PCCB PE=2 SV=1	crg:105329204/0.0/propionyl-CoA carboxylase beta chain, mitochondrial; K01966 propionyl-CoA carboxylase beta chain [EC:6.4.1.3 2.1.3.15]	CE07269/2e-170/[EI] KOG0540 3-Methylcrotonyl-CoA carboxylase, non-biotin containing subunit/Acetyl-CoA carboxylase carboxyl transferase, subunit beta	K1RNB5/0.0/K1RNB5_CRAGI Propionyl-CoA carboxylase beta chain, mitochondrial OS=Crassostrea gigas OX=29159 GN=CGI_10018049 PE=4 SV=1	PF01039/4.0E-93/Carboxyl transferase domain	2|IPR011763; Acetyl-coenzyme A carboxyltransferase, C-terminal|IPR034733; Acetyl-CoA carboxylase	molecular_function:GO:0016874//ligase activity;molecular_function:GO:0016874//ligase activity;
748_1	4.50075	NA	21635	EAIGQLASQGLSPVK	1	1	1	0.0769	25568	0	0	XP_011450223.1/8.88085e-144/PREDICTED: ras-related C3 botulinum toxin substrate 2 [Crassostrea gigas] &gt;XP_022288634.1 ras-related C3 botulinum toxin substrate 2-like [Crassostrea virginica] &gt;EKC30428.1 Ras-related C3 botulinum toxin substrate 2 [Crassostrea gigas]	Q6RUV5/1e-104/RAC1_RAT Ras-related C3 botulinum toxin substrate 1 OS=Rattus norvegicus OX=10116 GN=Rac1 PE=1 SV=1	crg:105344224/1e-144/ras-related C3 botulinum toxin substrate 2; K04392 Ras-related C3 botulinum toxin substrate 1	7301608/1e-119/[R] KOG0393 Ras-related small GTPase, Rho type	K1Q8Z8/2e-143/K1Q8Z8_CRAGI Ras-related C3 botulinum toxin substrate 2 OS=Crassostrea gigas OX=29159 GN=CGI_10021938 PE=4 SV=1	PTHR24072/3.6E-111/--	2|IPR001806; Small GTPase superfamily|IPR003578; Small GTPase superfamily, Rho type	biological_process:GO:0007264//small GTPase mediated signal transduction;cellular_component:GO:0005622//intracellular;molecular_function:GO:0003924//GTPase activity;GO:0005525//GTP binding;biological_process:GO:0007264//small GTPase mediated signal transduction;cellular_component:GO:0016020//membrane;GO:0005622//intracellular;molecular_function:GO:0005525//GTP binding;GO:0003924//GTPase activity;
807_1	6.66624	NA	244255	EEGWWVVIGDTK;LIQACVDVLSSNGWLSPALAAMELAQMVTQAMWGK	1;1	2	2	0.0219	24058;33911	179421	1423.97	XP_022344638.1/0/U5 small nuclear ribonucleoprotein 200 kDa helicase-like [Crassostrea virginica]	O75643/0.0/U520_HUMAN U5 small nuclear ribonucleoprotein 200 kDa helicase OS=Homo sapiens OX=9606 GN=SNRNP200 PE=1 SV=2	myi:110449759/0.0/U5 small nuclear ribonucleoprotein 200 kDa helicase-like; K12854 pre-mRNA-splicing helicase BRR2 [EC:3.6.4.13]	Hs22042312/0.0/[A] KOG0951 RNA helicase BRR2, DEAD-box superfamily	A0A210QQE1/0.0/A0A210QQE1_MIZYE U5 small nuclear ribonucleoprotein helicase OS=Mizuhopecten yessoensis OX=6573 GN=KP79_PYT17302 PE=4 SV=1	SM00490/1.1E-16/--	4|IPR001650; Helicase, C-terminal|IPR004179; Sec63 domain|IPR011545; DEAD/DEAH box helicase domain|IPR014001; Helicase superfamily 1/2, ATP-binding domain	molecular_function:GO:0003676//nucleic acid binding;GO:0005524//ATP binding;cellular_component:GO:0030529//intracellular ribonucleoprotein complex;GO:0019013//viral nucleocapsid;molecular_function:GO:0005524//ATP binding;GO:0004386//helicase activity;GO:0003676//nucleic acid binding;
357_1	4.50075	NA	49846.9	ALTVPELTQQMFDAK;EVDEQMLNVQNK;FPGQLNADLR;GHYTEGAELVDSVLDVVR;IMNTFSVVPSPK;LAVNMVPFPR;LHFFMPGFAPLTSR;NSSYFVEWIPNNVK;SGPFGQIFRPDNFVFGQSGAGNNWAK;TAVCDIPPR	0;0;0;0;0;0;0;0;1;0	1	1	0.3146	27709;27710;24607;24880;16573;29546;29545;21629;16945;27123;27252;27765;27752;27767;32953;13688;13692;13687	36239.1	1725.67	XP_021372086.1/0/tubulin beta chain-like [Mizuhopecten yessoensis]	P68372/0.0/TBB4B_MOUSE Tubulin beta-4B chain OS=Mus musculus OX=10090 GN=Tubb4b PE=1 SV=1	myi:110462458/0.0/tubulin beta chain-like; K07375 tubulin beta	Hs5174735/0.0/[Z] KOG1375 Beta tubulin	A0A481DKV7/0.0/A0A481DKV7_PIG Tubulin beta chain OS=Sus scrofa OX=9823 PE=3 SV=1	PF03953/9.3E-43/Tubulin C-terminal domain	6|IPR000217; Tubulin|IPR002453; Beta tubulin|IPR003008; Tubulin/FtsZ, GTPase domain|IPR013838; Beta tubulin, autoregulation binding site|IPR017975; Tubulin, conserved site|IPR018316; Tubulin/FtsZ, 2-layer sandwich domain	biological_process:GO:0007017//microtubule-based process;cellular_component:GO:0005874//microtubule;molecular_function:GO:0003924//GTPase activity;GO:0005200//structural constituent of cytoskeleton;GO:0005525//GTP binding;biological_process:GO:0007017//microtubule-based process;cellular_component:GO:0005874//microtubule;GO:0005737//cytoplasm;molecular_function:GO:0005200//structural constituent o…
863_1	5.99323	NA	51421.5	EEITVDCLDFNK;FECSWSGDDR	1;1	2	2	0.0494	25263;20096	74922.6	2881.64	XP_022341750.1/0/serine/threonine-protein phosphatase 2A 55 kDa regulatory subunit B alpha isoform-like [Crassostrea virginica]	P36876/0.0/2ABA_RAT Serine/threonine-protein phosphatase 2A 55 kDa regulatory subunit B alpha isoform OS=Rattus norvegicus OX=10116 GN=Ppp2r2a PE=2 SV=1	crg:105320707/0.0/serine/threonine-protein phosphatase 2A 55 kDa regulatory subunit B alpha isoform; K04354 serine/threonine-protein phosphatase 2A regulatory subunit B	Hs4506019/0.0/[T] KOG1354 Serine/threonine protein phosphatase 2A, regulatory subunit	K1QPJ9/0.0/K1QPJ9_CRAGI Serine/threonine-protein phosphatase 2A 55 kDa regulatory subunit B OS=Crassostrea gigas OX=29159 GN=CGI_10018645 PE=3 SV=1	PR00600/4.3E-167/Protein phosphatase PP2A 55kDa regulatory subunit signature	3|IPR000009; Protein phosphatase 2A regulatory subunit PR55|IPR001680; WD40 repeat|IPR018067; Protein phosphatase 2A regulatory subunit PR55, conserved site	cellular_component:GO:0000159//protein phosphatase type 2A complex;molecular_function:GO:0005515//protein binding;GO:0019888//protein phosphatase regulator activity;cellular_component:GO:0000159//protein phosphatase type 2A complex;molecular_function:GO:0019888//protein phosphatase regulator activity;
879_1	2.51052	NA	73257.5	HVFVSADECK	1	1	1	0.0156	18224	0	0	EKC27521.1/0/Calpain-5 [Crassostrea gigas]	O15484/0.0/CAN5_HUMAN Calpain-5 OS=Homo sapiens OX=9606 GN=CAPN5 PE=1 SV=2	crg:105337433/0.0/calpain-5; K08574 calpain-5 [EC:3.4.22.-]	Hs20483024/0.0/[OT] KOG0045 Cytosolic Ca2+-dependent cysteine protease (calpain), large subunit (EF-Hand protein superfamily)	K1R1C6/0.0/K1R1C6_CRAGI Calpain-5 OS=Crassostrea gigas OX=29159 GN=CGI_10008828 PE=3 SV=1	SM00720/1.9E-34/--	6|IPR000008; C2 domain|IPR000169; Cysteine peptidase, cysteine active site|IPR001300; Peptidase C2, calpain, catalytic domain|IPR022682; Peptidase C2, calpain, large subunit, domain III|IPR022683; Peptidase C2, calpain, domain III|IPR022684; Peptidase C2, calpain family	biological_process:GO:0006508//proteolysis;cellular_component:GO:0005622//intracellular;molecular_function:GO:0004198//calcium-dependent cysteine-type endopeptidase activity;cellular_component:GO:0005622//intracellular;molecular_function:GO:0004198//calcium-dependent cysteine-type endopeptidase activity;
364_1	6.66624	NA	62432.3	LQGPDTLLK;SPLVMAR	1;1	2	2	0.0288	12659;8214	5.6755e+06	210204	XP_022288413.1/0/probable sodium/potassium-transporting ATPase subunit beta-3 [Crassostrea virginica]	Q9XUY5/3e-65/AT1B3_CAEEL Probable sodium/potassium-transporting ATPase subunit beta-3 OS=Caenorhabditis elegans OX=6239 GN=nkb-3 PE=3 SV=1	crg:105333474/0.0/probable sodium/potassium-transporting ATPase subunit beta-3; K01540 sodium/potassium-transporting ATPase subunit beta	CE18746/1e-65/[P] KOG3927 Na+/K+ ATPase, beta subunit	A0A210PQH4/2e-162/A0A210PQH4_MIZYE Sodium/potassium-transporting ATPase subunit beta-3 OS=Mizuhopecten yessoensis OX=6573 GN=KP79_PYT20780 PE=4 SV=1	PTHR11523:SF28/5.4E-89/--	1|IPR000402; Sodium/potassium-transporting ATPase subunit beta	biological_process:GO:0006813//potassium ion transport;GO:0006814//sodium ion transport;cellular_component:GO:0005890//sodium:potassium-exchanging ATPase complex;biological_process:GO:0006813//potassium ion transport;GO:0006814//sodium ion transport;cellular_component:GO:0005890//sodium:potassium-exchanging ATPase complex;
134_1	4.50075	NA	271553	GIENIPMILVGNK	1	1	1	0.0053	23627	31572.5	241.012	XP_021365733.1/0/E3 ubiquitin-protein ligase TRIP12-like isoform X3 [Mizuhopecten yessoensis]	G5E870/0.0/TRIPC_MOUSE E3 ubiquitin-protein ligase TRIP12 OS=Mus musculus OX=10090 GN=Trip12 PE=1 SV=1	myi:110458386/0.0/E3 ubiquitin-protein ligase TRIP12-like isoform X1; K10590 E3 ubiquitin-protein ligase TRIP12 [EC:2.3.2.26]	Hs10863903_2/0.0/[O] KOG0170 E3 ubiquitin protein ligase	A0A210Q6R6/0.0/A0A210Q6R6_MIZYE E3 ubiquitin-protein ligase TRIP12 OS=Mizuhopecten yessoensis OX=6573 GN=KP79_PYT20483 PE=4 SV=1	PR00449/7.1E-12/Transforming protein P21 ras signature	5|IPR000569; HECT domain|IPR001806; Small GTPase superfamily|IPR004170; WWE domain|IPR018123; WWE domain, subgroup|IPR020849; Small GTPase superfamily, Ras-type	biological_process:GO:0007165//signal transduction;cellular_component:GO:0016020//membrane;molecular_function:GO:0003924//GTPase activity;GO:0004842//ubiquitin-protein transferase activity;GO:0005525//GTP binding;GO:0008270//zinc ion binding;
56_1	4.50075	NA	30232	TVLLIAWK	1	1	1	0.031	11776	0	0	XP_022342327.1/5.89567e-172/DCN1-like protein 1 [Crassostrea virginica]	Q5ZKU1/4e-137/DCNL1_CHICK DCN1-like protein 1 OS=Gallus gallus OX=9031 GN=DCUN1D1 PE=2 SV=1	crg:105339340/1e-172/DCN1-like protein 1; K17822 DCN1-like protein 1/2	Hs10190678/6e-137/[S] KOG3077 Uncharacterized conserved protein	A0A210R0D2/2e-169/A0A210R0D2_MIZYE Defective in cullin neddylation protein OS=Mizuhopecten yessoensis OX=6573 GN=KP79_PYT20854 PE=4 SV=1	PTHR12281/1.2E-130/--	2|IPR005176; Potentiating neddylation domain|IPR014764; Defective-in-cullin neddylation protein	NA
494_1	4.50075	NA	104316	IATENFITDER	1	1	1	0.0119	21362	147081	2451.35	XP_022338818.1/0/puromycin-sensitive aminopeptidase-like [Crassostrea virginica]	P55786/0.0/PSA_HUMAN Puromycin-sensitive aminopeptidase OS=Homo sapiens OX=9606 GN=NPEPPS PE=1 SV=2	crg:105348440/0.0/puromycin-sensitive aminopeptidase isoform X1; K08776 puromycin-sensitive aminopeptidase [EC:3.4.11.-]	Hs15451907/0.0/[EO] KOG1046 Puromycin-sensitive aminopeptidase and related aminopeptidases	V3ZAN6/0.0/V3ZAN6_LOTGI Aminopeptidase OS=Lottia gigantea OX=225164 GN=LOTGIDRAFT_204438 PE=3 SV=1	PF01433/1.1E-97/Peptidase family M1 domain	3|IPR001930; Peptidase M1, alanine aminopeptidase/leukotriene A4 hydrolase|IPR014782; Peptidase M1, membrane alanine aminopeptidase, N-terminal|IPR024571; ERAP1-like C-terminal domain	biological_process:GO:0006508//proteolysis;molecular_function:GO:0008237//metallopeptidase activity;GO:0008270//zinc ion binding;molecular_function:GO:0008237//metallopeptidase activity;GO:0004177//aminopeptidase activity;GO:0008270//zinc ion binding;
301_1	9.54437	NA	30653.5	DIDALEPLK;LELSDNK;SLDLYNCDVTNSDEYR	1;1;1	3	3	0.1185	13305;9002;29584	269969	26996.9	XP_022306233.1/2.63404e-88/acidic leucine-rich nuclear phosphoprotein 32 family member A-like isoform X3 [Crassostrea virginica]	Q28XE2/5e-70/AN32A_DROPS Acidic leucine-rich nuclear phosphoprotein 32 family member A OS=Drosophila pseudoobscura pseudoobscura OX=46245 GN=Anp32a PE=3 SV=2	nvi:100123297/2e-69/acidic leucine-rich nuclear phosphoprotein 32 family member A; K18646 acidic leucine-rich nuclear phosphoprotein 32 family member A/C/D	7302697/6e-70/[DR] KOG2739 Leucine-rich acidic nuclear protein	F0JAA6/2e-69/F0JAA6_AMBVA Mapmodulin-like protein OS=Amblyomma variegatum OX=34610 PE=2 SV=1	SM00446/6.6E-4/--	2|IPR001611; Leucine-rich repeat|IPR003603; U2A'/phosphoprotein 32 family A, C-terminal	molecular_function:GO:0005515//protein binding;
700_1	4.50075	NA	79100.5	GIFLYIFPK	1	1	1	0.0127	15583	59860.1	1870.63	XP_022338081.1/0/galactocerebrosidase-like isoform X1 [Crassostrea virginica] &gt;XP_022338082.1 galactocerebrosidase-like isoform X1 [Crassostrea virginica]	B5X3C1/0.0/GALC_SALSA Galactocerebrosidase OS=Salmo salar OX=8030 GN=galc PE=2 SV=1	myi:110460487/0.0/galactocerebrosidase-like isoform X1; K01202 galactosylceramidase [EC:3.2.1.46]	NA	A0A210Q2D6/0.0/A0A210Q2D6_MIZYE Galactocerebrosidase OS=Mizuhopecten yessoensis OX=6573 GN=KP79_PYT17644 PE=4 SV=1	PTHR15172/3.7E-271/--	2|IPR001286; Glycoside hydrolase, family 59|IPR035394; Glycosyl hydrolase family 59, central domain	biological_process:GO:0006683//galactosylceramide catabolic process;molecular_function:GO:0004336//galactosylceramidase activity;
770_1	3.217	NA	24273	QYDSFTWK	1	1	1	0.0377	14918	0	0	XP_011419882.1/1.02793e-115/PREDICTED: transmembrane emp24 domain-containing protein 7 isoform X2 [Crassostrea gigas]	Q9Y3B3/4e-90/TMED7_HUMAN Transmembrane emp24 domain-containing protein 7 OS=Homo sapiens OX=9606 GN=TMED7 PE=1 SV=2	crg:105322722/2e-116/transmembrane emp24 domain-containing protein 7 isoform X2; K20349 p24 family protein gamma-3	Hs14731618/2e-90/[U] KOG1693 emp24/gp25L/p24 family of membrane trafficking proteins	K1QAL1/4e-107/K1QAL1_CRAGI Transmembrane emp24 domain-containing protein 7 OS=Crassostrea gigas OX=29159 GN=CGI_10020758 PE=3 SV=1	PTHR22811:SF49/4.3E-89/--	3|IPR009038; GOLD domain|IPR015718; Transmembrane emp24 domain-containing protein 7|IPR015720; TMP21-related	biological_process:GO:0006810//transport;cellular_component:GO:0016021//integral component of membrane;
708_1	2.54379	NA	164312	TLNASGTMLTQNVNLKTLNASGIMSIIVGTMLTQNVNLTTLNASGTMLTQNVNLK	1	1	1	0.0353	34267	0	0	XP_011441623.1/1.25527e-64/PREDICTED: leucine-rich repeat-containing protein 74A [Crassostrea gigas]	Q6ZQY2/3e-31/LR74B_HUMAN Leucine-rich repeat-containing protein 74B OS=Homo sapiens OX=9606 GN=LRRC74B PE=2 SV=3	hgl:101701752/3e-21/Lrrc74b; leucine rich repeat containing 74B; K07374 tubulin alpha	Hs18597369/1e-18/[S] KOG4308 LRR-containing protein	K1RAM2/9e-64/K1RAM2_CRAGI Uncharacterized protein OS=Crassostrea gigas OX=29159 GN=CGI_10015924 PE=4 SV=1	PS51450/5.463/Leucine-rich repeat profile.	1|IPR001611; Leucine-rich repeat	molecular_function:GO:0005515//protein binding;
825_1	4.50075	NA	20997.9	VIPSLSEAEDK	1	1	1	0.0585	18129	181081	18108.1	XP_011424539.1/1.18962e-92/PREDICTED: adipocyte plasma membrane-associated protein isoform X2 [Crassostrea gigas] &gt;XP_019921945.1 PREDICTED: adipocyte plasma membrane-associated protein isoform X2 [Crassostrea gigas] &gt;EKC42337.1 Adipocyte plasma membrane-associated protein [Crassostrea gigas]	B5X3B2/7e-53/APMAP_SALSA Adipocyte plasma membrane-associated protein OS=Salmo salar OX=8030 GN=apmap PE=2 SV=1	crg:105326291/3e-93/adipocyte plasma membrane-associated protein isoform X1; K21407 adipocyte plasma membrane-associated protein	Hs14772303/9e-51/[R] KOG1520 Predicted alkaloid synthase/Surface mucin Hemomucin	K1QZ49/2e-92/K1QZ49_CRAGI Adipocyte plasma membrane-associated protein OS=Crassostrea gigas OX=29159 GN=CGI_10024794 PE=4 SV=1	PF03088/8.2E-13/Strictosidine synthase	2|IPR004141; Strictosidine synthase|IPR018119; Strictosidine synthase, conserved region	biological_process:GO:0009058//biosynthetic process;molecular_function:GO:0016844//strictosidine synthase activity;biological_process:GO:0009058//biosynthetic process;cellular_component:GO:0016021//integral component of membrane;molecular_function:GO:0016844//strictosidine synthase activity;
101_1	4.50075	NA	26059.5	LYHPFSTTVAEQYTLPK	1	1	1	0.078	29817	0	0	XP_013069463.1/3.5416e-46/PREDICTED: uncharacterized protein LOC106057008 [Biomphalaria glabrata] &gt;XP_013069464.1 PREDICTED: uncharacterized protein LOC106057008 [Biomphalaria glabrata] &gt;XP_013069465.1 PREDICTED: uncharacterized protein LOC106057008 [Biomphalaria glabrata] &gt;XP_013069466.1 PREDICTED: uncharacterized protein LOC106057008 [Biomphalaria glabrata]	Q8JZS9/5e-14/RM48_MOUSE 39S ribosomal protein L48, mitochondrial OS=Mus musculus OX=10090 GN=Mrpl48 PE=1 SV=1	crg:105322417/4e-29/39S ribosomal protein L48, mitochondrial-like; K17429 large subunit ribosomal protein L48	7296051/2e-23/[S] KOG4060 Uncharacterized conserved protein	A0A2C9L8A0/6e-46/A0A2C9L8A0_BIOGL Uncharacterized protein OS=Biomphalaria glabrata OX=6526 GN=106057008 PE=4 SV=1	SM01403/0.0016/--	2|IPR027486; Ribosomal protein S10 domain|IPR027487; Mitochondrial ribosomal protein L48	cellular_component:GO:0005761//mitochondrial ribosome;cellular_component:GO:0005761//mitochondrial ribosome;
36_1	2.58375	NA	63876.9	IGYDVVAVIVPVK	1	1	1	0.0233	23021	6945.55	198.444	XP_020512316.1/6.92949e-14/GTPase IMAP family member 7-like [Labrus bergylta]	Q8K349/5e-11/GIMA6_MOUSE GTPase IMAP family member 6 OS=Mus musculus OX=10090 GN=Gimap6 PE=2 SV=1	mgp:104914585/5e-09/zinc finger protein 568-like; K09228 KRAB domain-containing zinc finger protein	Hs18594498/4e-11/[V] TWOG0191 Protein involved in control of unknown local host defense mechanisms to pathogens	A0A194ALB5/0.0/A0A194ALB5_PINFU Uncharacterized protein OS=Pinctada fucata OX=50426 PE=4 SV=1	PF04548/3.5E-21/AIG1 family	1|IPR006703; AIG1-type guanine nucleotide-binding (G) domain	molecular_function:GO:0005525//GTP binding;molecular_function:GO:0005525//GTP binding;
682_1	2.58375	NA	43061.7	LPECEADEVLR	1	1	1	0.0288	21904	596989	31420.5	XP_011427006.1/1.57867e-160/PREDICTED: ataxin-3 [Crassostrea gigas]	Q9CVD2/1e-101/ATX3_MOUSE Ataxin-3 OS=Mus musculus OX=10090 GN=Atxn3 PE=1 SV=2	crg:105327996/2e-161/ataxin-3; K11863 Ataxin-3 [EC:3.4.22.-]	Hs13518019/5e-101/[R] KOG2935 Ataxin 3/Josephin	K1PJQ9/3e-154/K1PJQ9_CRAGI Ataxin-3 OS=Crassostrea gigas OX=29159 GN=CGI_10011292 PE=4 SV=1	SM01246/1.7E-79/--	3|IPR003903; Ubiquitin interacting motif|IPR006155; Josephin domain|IPR033865; Machado-Joseph disease protein	biological_process:GO:0016579//protein deubiquitination;molecular_function:GO:0004843//thiol-dependent ubiquitin-specific protease activity;
885_1	4.50075	NA	132725	AIEDDEQLDR	1	1	1	0.0085	18597	0	0	XP_022330023.1/0/EH domain-binding protein 1-like isoform X1 [Crassostrea virginica]	Q8NDI1/2e-157/EHBP1_HUMAN EH domain-binding protein 1 OS=Homo sapiens OX=9606 GN=EHBP1 PE=1 SV=3	ola:101157556/2e-74/titin homolog isoform X1; K18626 trichohyalin	Hs22062496/7e-68/[Z] KOG0035 Ca2+-binding actin-bundling protein (actinin), alpha chain (EF-Hand protein superfamily)	A0A2Y9JR22/0.0/A0A2Y9JR22_ENHLU EH domain-binding protein 1 isoform X2 OS=Enhydra lutris kenyoni OX=391180 GN=LOC111148128 PE=4 SV=1	PF00307/7.9E-23/Calponin homology (CH) domain	4|IPR001715; Calponin homology domain|IPR019448; NT-type C2 domain|IPR022735; bMERB domain|IPR029944; EH domain-binding protein 1	molecular_function:GO:0005515//protein binding;
177_1	3.05726	NA	192790	IGVVDVTENPGLSGR	1	1	1	0.0091	25818	0	0	BAC82624.1/2.0015e-136/pol-like protein [Ciona intestinalis]	P14381/5e-71/YTX2_XENLA Transposon TX1 uncharacterized 149 kDa protein OS=Xenopus laevis OX=8355 PE=4 SV=1	lcm:102351696/7e-62/uncharacterized LOC102351696; K19941 synapsin	CE20819/4e-67/[OC] KOG0913 Thiol-disulfide isomerase and thioredoxin	A0A2G8JMH0/7e-174/A0A2G8JMH0_STIJA Pol-like protein OS=Stichopus japonicus OX=307972 GN=BSL78_26260 PE=4 SV=1	PTHR44484/2.5E-181/--	4|IPR000477; Reverse transcriptase domain|IPR002775; DNA/RNA-binding protein Alba-like|IPR013766; Thioredoxin domain|IPR026960; Reverse transcriptase zinc-binding domain	biological_process:GO:0045454//cell redox homeostasis;molecular_function:GO:0003676//nucleic acid binding;
435_1	2.13032	NA	36523	LDSTEINGR	1	1	1	0.0284	13128	0	0	XP_012284893.1/1.3767e-67/PREDICTED: serine-arginine protein 55-like isoform X3 [Orussus abietinus] &gt;XP_012284894.1 PREDICTED: serine-arginine protein 55-like isoform X3 [Orussus abietinus]	Q8VE97/1e-62/SRSF4_MOUSE Serine/arginine-rich splicing factor 4 OS=Mus musculus OX=10090 GN=Srsf4 PE=2 SV=1	myi:110449184/3e-72/serine/arginine-rich splicing factor 6-like isoform X1; K12893 splicing factor, arginine/serine-rich 4/5/6	Hs21361282/2e-62/[A] KOG0106 Alternative splicing factor SRp55/B52/SRp75 (RRM superfamily)	K1R435/1e-76/K1R435_CRAGI Splicing factor, arginine/serine-rich 4 OS=Crassostrea gigas OX=29159 GN=CGI_10002568 PE=4 SV=1	PS50102/9.013/Eukaryotic RNA Recognition Motif (RRM) profile.	1|IPR000504; RNA recognition motif domain	molecular_function:GO:0003676//nucleic acid binding;
73_1	4.50075	NA	83923.3	AAPVAIGTVR	1	1	1	0.0134	12006	45295.1	871.06	XP_011428782.1/0/PREDICTED: uncharacterized protein LOC105329287 [Crassostrea gigas]	Q3UYG8/2e-44/MACD2_MOUSE ADP-ribose glycohydrolase MACROD2 OS=Mus musculus OX=10090 GN=Macrod2 PE=1 SV=1	aqu:105315004/4e-46/zinc finger MYM-type protein 2-like; K21754 BTB/POZ domain-containing protein KCTD1/15	Hs13569840/3e-39/[BK] KOG2633 Hismacro and SEC14 domain-containing proteins	K1Q1U9/2e-154/K1Q1U9_CRAGI Zinc finger MYM-type protein 2 OS=Crassostrea gigas OX=29159 GN=CGI_10001426 PE=4 SV=1	PTHR21446:SF3/6.0E-75/--	3|IPR002589; Macro domain|IPR021893; Protein of unknown function DUF3504|IPR026148; Mitochondrial antiviral-signalling protein	biological_process:GO:0051607//defense response to virus;cellular_component:GO:0005739//mitochondrion;
545_1	2.84974	NA	50284	SEVSSTSTASSIK	1	1	1	0.0277	20743	8592.53	268.517	EKC25680.1/9.32541e-134/Uncharacterized protein C19orf47 [Crassostrea gigas]	Q8N9M1/2e-45/CS047_HUMAN Uncharacterized protein C19orf47 OS=Homo sapiens OX=9606 GN=C19orf47 PE=1 SV=1	fcd:110843652/3e-07/uncharacterized protein LOC110843652; K04461 protein phosphatase 1B [EC:3.1.3.16]	7298023/4e-35/[S] KOG3930 Uncharacterized conserved protein	K1QA17/2e-133/K1QA17_CRAGI Uncharacterized protein C19orf47 OS=Crassostrea gigas OX=29159 GN=CGI_10017614 PE=4 SV=1	PTHR21359/2.2E-79/--	1|IPR039161; Uncharacterized protein C19orf47-like	NA
818_1	4.50075	NA	43119.7	VEHALGGSSSLR	1	1	1	0.0319	18815	0	0	XP_022329740.1/6.00126e-164/BRISC and BRCA1-A complex member 2-like [Crassostrea virginica]	B6NXD5/1e-129/BABA2_BRAFL BRISC and BRCA1-A complex member 2 OS=Branchiostoma floridae OX=7739 GN=BABAM2 PE=3 SV=1	crg:105331437/5e-163/BRCA1-A complex subunit BRE; K12173 BRCA1-A complex subunit BRE	HsM4757872/3e-112/[T] TWOG0611 Modulator of p55 tumor necrosis factor alpha (TNF) receptor and related proteins	K1PTQ4/7e-158/K1PTQ4_CRAGI BRCA1-A complex subunit BRE OS=Crassostrea gigas OX=29159 GN=CGI_10004893 PE=4 SV=1	PF06113/6.0E-107/Brain and reproductive organ-expressed protein (BRE)	1|IPR010358; BRCA1-A complex subunit BRE	cellular_component:GO:0070531//BRCA1-A complex;GO:0070552//BRISC complex;cellular_component:GO:0070552//BRISC complex;GO:0070531//BRCA1-A complex;
466_1	4.50075	NA	58452.6	EFDGFEQLFGR	1	1	1	0.021	22397	0	0	XP_022333349.1/0/UTP--glucose-1-phosphate uridylyltransferase-like isoform X1 [Crassostrea virginica]	Q91ZJ5/0.0/UGPA_MOUSE UTP--glucose-1-phosphate uridylyltransferase OS=Mus musculus OX=10090 GN=Ugp2 PE=1 SV=3	crg:105343883/0.0/UTP--glucose-1-phosphate uridylyltransferase isoform X1; K00963 UTP--glucose-1-phosphate uridylyltransferase [EC:2.7.7.9]	Hs13027638/0.0/[G] KOG2638 UDP-glucose pyrophosphorylase	K1Q1D1/0.0/K1Q1D1_CRAGI UTP--glucose-1-phosphate uridylyltransferase OS=Crassostrea gigas OX=29159 GN=CGI_10015638 PE=3 SV=1	PTHR43511:SF4/3.0E-213/--	1|IPR002618; UDPGP family	biological_process:GO:0008152//metabolic process;molecular_function:GO:0070569//uridylyltransferase activity;biological_process:GO:0006011//UDP-glucose metabolic process;molecular_function:GO:0003983//UTP:glucose-1-phosphate uridylyltransferase activity;

## Sheet: Common to both probes
Mass spectrometry results for both two probes
Group_ID	Protein_Qscore	Protein_FDR	Protein_Mass	PeptideSeqs	PepIsUnique	Unique_Peptide_Num	Unique_Spectra_Num	Coverage	Peptide_Query	Abundance	iBAQ	Nr	Swissprot	KEGG	KOG	TrEMBL	Interpro	Interpro_ipr	GO
162_1	6.52002	NA	59909.9	FGALTSSGGDDADAK;FGVMNEDLK	1;1	2	2	0.0454	23751;14269	269682	9631.51	XP_011438395.1/6.19763e-53/PREDICTED: SAP domain-containing ribonucleoprotein [Crassostrea gigas]	Q9D1J3/6e-20/SARNP_MOUSE SAP domain-containing ribonucleoprotein OS=Mus musculus OX=10090 GN=Sarnp PE=1 SV=3	crg:105335950/1e-53/SAP domain-containing ribonucleoprotein; K18732 SAP domain-containing ribonucleoprotein	HsM20149702_2/1e-14/[D] KOG4259 Putative nucleic acid-binding protein Hcc-1/proliferation associated cytokine-inducible protein, contains SAP domain	A0A210QL44/1e-47/A0A210QL44_MIZYE SAP domain-containing ribonucleoprotein OS=Mizuhopecten yessoensis OX=6573 GN=KP79_PYT19461 PE=4 SV=1	PTHR12381/2.3E-20/--	1|IPR003034; SAP domain	NA
831_1	2.96913	NA	23059.8	QVTVDEAQQR	1	1	1	0.0498	17216	0	0	XP_011423235.1/3.85332e-131/PREDICTED: ras-related protein Ral-A isoform X2 [Crassostrea gigas]	P48555/2e-116/RALA_DROME Ras-related protein Ral-a OS=Drosophila melanogaster OX=7227 GN=Rala PE=1 SV=2	crg:105325395/6e-132/ras-related protein Ral-A isoform X2; K07834 Ras-related protein Ral-A	7290433/7e-117/[R] KOG0395 Ras-related GTPase	A0A0L8FI54/4e-128/A0A0L8FI54_OCTBM Uncharacterized protein OS=Octopus bimaculoides OX=37653 GN=OCBIM_22019372mg PE=4 SV=1	PTHR24070:SF258/5.7E-109/--	2|IPR001806; Small GTPase superfamily|IPR020849; Small GTPase superfamily, Ras-type	biological_process:GO:0007165//signal transduction;cellular_component:GO:0016020//membrane;molecular_function:GO:0003924//GTPase activity;GO:0005525//GTP binding;biological_process:GO:0007165//signal transduction;cellular_component:GO:0016020//membrane;molecular_function:GO:0005525//GTP binding;GO:0003924//GTPase activity;
44_1	4.33022	NA	40691.5	LEDLSNNDAYR	1	1	1	0.0304	21260	921640	48507.4	XP_011442899.1/1.02532e-19/PREDICTED: uncharacterized protein LOC105339169 [Crassostrea gigas]	Q3URE9/2e-08/LIGO2_MOUSE Leucine-rich repeat and immunoglobulin-like domain-containing nogo receptor-interacting protein 2 OS=Mus musculus OX=10090 GN=Lingo2 PE=2 SV=1	obi:106878986/3e-10/insulin-like growth factor-binding protein complex acid labile subunit; K17256 insulin-like growth factor-binding protein complex acid labile subunit	Hs18571999/1e-08/[R] KOG0619 FOG: Leucine rich repeat	A0A210PTZ1/2e-17/A0A210PTZ1_MIZYE Leucine-rich repeat-containing protein 4C OS=Mizuhopecten yessoensis OX=6573 GN=KP79_PYT19664 PE=4 SV=1	PTHR43983/1.9E-29/--	NA	NA
154_2	22.6128	NA	21604.2	DAVLLVFANK;HYFQNTQGLIFVVDSNDR;HYFQNTQGLIFVVDSNDRER;ILMVGLDAAGK;LFSSLFGK;LGLHSLR;MLNEDELR;NISFTVWDVGGQDK	1;1;1;0;1;1;1;0	6	32	0.4084	15365;15373;15375;15367;15379;15366;15362;15363;15371;15361;15372;15368;15374;15378;15370;15377;15376;15364;30230;30232;30229;30231;30237;30228;30238;31431;15303;15810;10790;10791;8619;13874;13503;13519;26373;26374;26383	4.15562e+06	319663	XP_001634219.1/5.07795e-124/predicted protein [Nematostella vectensis] &gt;EDO42156.1 predicted protein [Nematostella vectensis]	P61210/5e-122/ARF1_LOCMI ADP-ribosylation factor 1 OS=Locusta migratoria OX=7004 GN=ARF1 PE=2 SV=2	epa:110254654/7e-123/ADP-ribosylation factor 1-like 2 isoform X1; K07937 ADP-ribosylation factor 1	7296589/2e-122/[U] KOG0070 GTP-binding ADP-ribosylation factor Arf1	Q7YZY2/3e-122/Q7YZY2_AIPPU ADP-ribosylation factor 1 OS=Aiptasia pulchella OX=12924 GN=arf1 PE=2 SV=1	PTHR11711/1.7E-113/--	2|IPR006689; Small GTPase superfamily, ARF/SAR type|IPR024156; Small GTPase superfamily, ARF type	cellular_component:GO:0005622//intracellular;molecular_function:GO:0005525//GTP binding;biological_process:GO:0007264//small GTPase mediated signal transduction;cellular_component:GO:0005622//intracellular;molecular_function:GO:0005525//GTP binding;
820_1	7.29935	NA	70453.3	GEAFEYDDAR;VEGFPTIYFAPSDNK	1;1	2	2	0.0406	17646;27411	138654	3555.23	XP_022309872.1/0/protein disulfide-isomerase A4-like [Crassostrea virginica]	P08003/0.0/PDIA4_MOUSE Protein disulfide-isomerase A4 OS=Mus musculus OX=10090 GN=Pdia4 PE=1 SV=3	crg:105322320/0.0/protein disulfide-isomerase A4 isoform X1; K09582 protein disulfide-isomerase A4 [EC:5.3.4.1]	Hs4758304/0.0/[O] KOG0190 Protein disulfide isomerase (prolyl 4-hydroxylase beta subunit)	K1QCC9/0.0/K1QCC9_CRAGI Protein disulfide-isomerase OS=Crassostrea gigas OX=29159 GN=CGI_10019057 PE=3 SV=1	PR00421/1.5E-7/Thioredoxin family signature	2|IPR013766; Thioredoxin domain|IPR017937; Thioredoxin, conserved site	biological_process:GO:0045454//cell redox homeostasis;biological_process:GO:0045454//cell redox homeostasis;cellular_component:GO:0005783//endoplasmic reticulum;molecular_function:GO:0003756//protein disulfide isomerase activity;
713_1	9.74847	NA	23676.9	AAILIFANK;LWNLFTNEEHK;MLNHEDLR;VIIVGLDNAGK	1;1;1;1	4	4	0.1857	12182;24136;13693;15652	35900	2991.67	XP_011455767.2/2.06274e-117/PREDICTED: ADP-ribosylation factor-like protein 5B [Crassostrea gigas]	Q9D4P0/3e-102/ARL5B_MOUSE ADP-ribosylation factor-like protein 5B OS=Mus musculus OX=10090 GN=Arl5b PE=2 SV=3	crg:105348148/3e-118/ADP-ribosylation factor-like protein 5B; K07950 ADP-ribosylation factor-like protein 5B	Hs20473689/1e-102/[U] KOG0070 GTP-binding ADP-ribosylation factor Arf1	A0A210R3F3/5e-112/A0A210R3F3_MIZYE ADP-ribosylation factor-like protein 5B OS=Mizuhopecten yessoensis OX=6573 GN=KP79_PYT19535 PE=3 SV=1	SM00178/1.5E-16/--	2|IPR006689; Small GTPase superfamily, ARF/SAR type|IPR024156; Small GTPase superfamily, ARF type	cellular_component:GO:0005622//intracellular;molecular_function:GO:0005525//GTP binding;biological_process:GO:0007264//small GTPase mediated signal transduction;cellular_component:GO:0005622//intracellular;molecular_function:GO:0005525//GTP binding;
431_1	5.93826	NA	12940.4	DVDPTQTVDNFR;TNDPVINTDR	1;1	2	2	0.2	23648;16918	340264	37807.1	XP_019928792.1/1.07162e-43/PREDICTED: UPF0538 protein C2orf76 homolog isoform X2 [Crassostrea gigas]	Q66IB8/3e-32/CB076_DANRE UPF0538 protein C2orf76 homolog OS=Danio rerio OX=7955 GN=zgc:101851 PE=2 SV=1	NA	Hs17441792/3e-26/[S] KOG4147 Uncharacterized conserved protein	K1R6Y1/2e-38/K1R6Y1_CRAGI UPF0538 protein C2orf76-like protein OS=Crassostrea gigas OX=29159 GN=CGI_10021401 PE=4 SV=1	PTHR18444/7.1E-38/--	2|IPR000626; Ubiquitin domain|IPR018794; Uncharacterised protein family UPF0538	molecular_function:GO:0005515//protein binding;
514_1	5.33395	NA	43848.6	ALSYQLAVGNK;KPEVAAITR	1;1	2	2	0.0531	17415;12661	233269	8331.03	XP_022333641.1/6.27694e-57/uncharacterized protein LOC111130721 [Crassostrea virginica]	B1AR13/4e-19/CISD3_MOUSE CDGSH iron-sulfur domain-containing protein 3, mitochondrial OS=Mus musculus OX=10090 GN=Cisd3 PE=1 SV=1	xtr:101733913/9e-09/ros1, c-ros, ros; ROS proto-oncogene 1 , receptor tyrosine kinase; K05088 proto-oncogene tyrosine-protein kinase ROS [EC:2.7.10.1]	7302300/1e-28/[S] KOG4605 Uncharacterized conserved protein containing CDGSH-type Zn-finger	A0A0L8HKF9/4e-37/A0A0L8HKF9_OCTBM Uncharacterized protein OS=Octopus bimaculoides OX=37653 GN=OCBIM_22013324mg PE=4 SV=1	PF09360/9.4E-9/Iron-binding zinc finger CDGSH type	1|IPR018967; Iron sulphur-containing domain, CDGSH-type	cellular_component:GO:0043231//intracellular membrane-bounded organelle;molecular_function:GO:0051537//2 iron, 2 sulfur cluster binding;cellular_component:GO:0043231//intracellular membrane-bounded organelle;molecular_function:GO:0051537//2 iron, 2 sulfur cluster binding;
29_1	7.15806	NA	22731.4	FGPYFVEPVIAGIDPK;LNLYELR;NCVAIAADR	1;1;1	3	3	0.1584	27867;11288;12772	60645.4	6738.38	XP_020905965.1/5.08838e-132/proteasome subunit beta type-3-like [Exaiptasia pallida] &gt;KXJ25711.1 Proteasome subunit beta type-3 [Exaiptasia pallida]	O73817/1e-126/PSB3_ONCMY Proteasome subunit beta type-3 OS=Oncorhynchus mykiss OX=8022 GN=psmb3 PE=2 SV=1	spis:111336914/2e-133/proteasome subunit beta type-3-like; K02735 20S proteasome subunit beta 3 [EC:3.4.25.1]	Hs4506197/3e-122/[O] KOG0180 20S proteasome, regulatory subunit beta type PSMB3/PUP3	A0A3M6TXZ7/1e-131/A0A3M6TXZ7_9CNID Proteasome subunit beta OS=Pocillopora damicornis OX=46731 GN=pdam_00000664 PE=3 SV=1	PTHR11599/3.7E-112/--	4|IPR001353; Proteasome, subunit alpha/beta|IPR016050; Proteasome beta-type subunit, conserved site|IPR023333; Proteasome B-type subunit|IPR033811; Proteasome beta 3 subunit	biological_process:GO:0043161//proteasome-mediated ubiquitin-dependent protein catabolic process;GO:0051603//proteolysis involved in cellular protein catabolic process;cellular_component:GO:0005839//proteasome core complex;GO:0019774//proteasome core complex, beta-subunit complex;molecular_function:GO:0004175//endopeptidase activity;GO:0004298//threonine-type endopeptidase activity;biological_pro…
900_1	28.2177	NA	103341	DDETMYVDAQK;DNTINLIHTLR;DPPQELQGTDAR;HCFASVFEK;IVEETLTQK;MILLEINNR;VFMQEFK;VTVIFSTIFK	1;1;1;1;1;1;1;1	8	11	0.0848	21382;21785;21272;21271;21678;21679;16342;14518;16137;11452;17179	1.60053e+07	421191	XP_011448246.1/0/PREDICTED: actin-related protein 2/3 complex subunit 2 isoform X2 [Crassostrea gigas]	Q3MHR7/7e-160/ARPC2_BOVIN Actin-related protein 2/3 complex subunit 2 OS=Bos taurus OX=9913 GN=ARPC2 PE=1 SV=1	crg:105342876/0.0/actin-related protein 2/3 complex subunit 2 isoform X2; K05758 actin related protein 2/3 complex, subunit 2	Hs5031599/1e-159/[Z] KOG2826 Actin-related protein Arp2/3 complex, subunit ARPC2	A0A210QIF0/3e-172/A0A210QIF0_MIZYE Arp2/3 complex 34 kDa subunit OS=Mizuhopecten yessoensis OX=6573 GN=KP79_PYT19631 PE=3 SV=1	PTHR12058/1.4E-142/--	1|IPR007188; Actin-related protein 2/3 complex subunit 2	biological_process:GO:0030833//regulation of actin filament polymerization;GO:0034314//Arp2/3 complex-mediated actin nucleation;cellular_component:GO:0005885//Arp2/3 protein complex;GO:0015629//actin cytoskeleton;
236_1	5.02957	NA	134750	DSDRPVSAEVSTYVNAEK;SMPFDLPLVR	1;1	2	2	0.0234	29205;17712	58661	850.159	XP_021376424.1/0/integrin alpha-V-like isoform X1 [Mizuhopecten yessoensis]	P12080/2e-150/ITA2_DROME Integrin alpha-PS2 OS=Drosophila melanogaster OX=7227 GN=if PE=1 SV=2	myi:110465137/0.0/integrin alpha-V-like isoform X1; K06584 integrin alpha 8	7293280/7e-151/[W] KOG3637 Vitronectin receptor, alpha subunit	A0A210R259/0.0/A0A210R259_MIZYE Integrin alpha-8 OS=Mizuhopecten yessoensis OX=6573 GN=KP79_PYT18966 PE=3 SV=1	SM00191/0.51/--	4|IPR000413; Integrin alpha chain|IPR013517; FG-GAP repeat|IPR013519; Integrin alpha beta-propellor|IPR013649; Integrin alpha-2	biological_process:GO:0007155//cell adhesion;cellular_component:GO:0008305//integrin complex;
944_1	4.33022	NA	66040.3	SAVGNLGTLVDGWR	1	1	1	0.024	24425	116363	3062.18	XP_022303917.1/0/nostrin-like isoform X5 [Crassostrea virginica]	Q8IVI9/2e-69/NOSTN_HUMAN Nostrin OS=Homo sapiens OX=9606 GN=NOSTRIN PE=1 SV=2	myi:110460102/0.0/nostrin-like isoform X1; K20126 nostrin	7290994/7e-77/[R] KOG4429 Uncharacterized conserved protein, contains SH3 and FCH domains	A0A210Q322/0.0/A0A210Q322_MIZYE Nostrin OS=Mizuhopecten yessoensis OX=6573 GN=KP79_PYT19742 PE=4 SV=1	PR00452/1.8E-9/SH3 domain signature	4|IPR001060; FCH domain|IPR001452; SH3 domain|IPR028535; Nostrin|IPR031160; F-BAR domain	molecular_function:GO:0005515//protein binding;
376_1	4.33022	NA	45561	LEGGSGGDSEVQR	1	1	1	0.0323	20792	0	0	XP_022304231.1/0/26S proteasome regulatory subunit 8 [Crassostrea virginica]	P54814/0.0/PRS8_MANSE 26S proteasome regulatory subunit 8 OS=Manduca sexta OX=7130 PE=2 SV=1	crg:105334244/0.0/26S protease regulatory subunit 8; K03066 26S proteasome regulatory subunit T6	7295522/0.0/[O] KOG0728 26S proteasome regulatory complex, ATPase RPT6	A0A210PSF2/0.0/A0A210PSF2_MIZYE 26S protease regulatory subunit 8 OS=Mizuhopecten yessoensis OX=6573 GN=KP79_PYT19826 PE=3 SV=1	PTHR23073/3.2E-242/--	4|IPR003593; AAA+ ATPase domain|IPR003959; ATPase, AAA-type, core|IPR003960; ATPase, AAA-type, conserved site|IPR035261; 26S proteasome regulatory subunit 8	molecular_function:GO:0005524//ATP binding;GO:0036402//proteasome-activating ATPase activity;
295_1	5.40124	NA	73575.7	GAPPLQLPR;GDVDVNMGHSSFISR	1;1	2	2	0.0346	11924;26891	505034	17415	XP_011416099.1/0/PREDICTED: forkhead box protein K2 isoform X1 [Crassostrea gigas] &gt;XP_011416100.1 PREDICTED: forkhead box protein K2 isoform X2 [Crassostrea gigas] &gt;EKC32265.1 Forkhead box protein K1 [Crassostrea gigas]	Q7ZX03/2e-150/FOXK2_XENLA Forkhead box protein K2 OS=Xenopus laevis OX=8355 GN=foxk2 PE=2 SV=2	crg:105320036/0.0/forkhead box protein K2 isoform X1; K09404 forkhead box protein K	Hs20540128/5e-138/[K] KOG2294 Transcription factor of the Forkhead/HNF3 family	K1QTG0/0.0/K1QTG0_CRAGI Forkhead box protein K1 OS=Crassostrea gigas OX=29159 GN=CGI_10026255 PE=4 SV=1	SM00240/9.4E-10/--	4|IPR000253; Forkhead-associated (FHA) domain|IPR001766; Fork head domain|IPR018122; Fork head domain conserved site1|IPR030456; Fork head domain conserved site 2	biological_process:GO:0006355//regulation of transcription, DNA-templated;molecular_function:GO:0003700//DNA binding transcription factor activity;GO:0005515//protein binding;GO:0043565//sequence-specific DNA binding;cellular_component:GO:0005634//nucleus;molecular_function:GO:0043565//sequence-specific DNA binding;GO:0003700//DNA binding transcription factor activity;
37_1	8.66045	NA	24206.8	LVHDLEFAQIETQVVQGLK;TDGQLENIER	1;1	2	3	0.1388	30304;30305;17700	1.15733e+06	96444.3	XP_011416107.1/7.22212e-103/PREDICTED: charged multivesicular body protein 6-like [Crassostrea gigas]	P0C0A3/7e-78/CHMP6_MOUSE Charged multivesicular body protein 6 OS=Mus musculus OX=10090 GN=Chmp6 PE=1 SV=2	crg:105320043/1e-103/charged multivesicular body protein 6-like; K12195 charged multivesicular body protein 6	YLR025w/7e-15/[U] KOG1656 Protein involved in glucose derepression and pre-vacuolar endosome protein sorting	A0A1S3ILT4/1e-96/A0A1S3ILT4_LINUN charged multivesicular body protein 6-B OS=Lingula unguis OX=7574 GN=LOC106165538 PE=4 SV=1	PTHR22761/1.1E-67/--	1|IPR005024; Snf7 family	biological_process:GO:0007034//vacuolar transport;biological_process:GO:0007034//vacuolar transport;cellular_component:GO:0005622//intracellular;
882_1	10.6498	NA	15565.6	IIDLSDAGPIK;LIGLTEMFPESLR;NFMGTVTTYAWK	1;1;1	3	3	0.2571	16814;25525;23898	353494	50499.1	XP_011433501.1/5.08281e-37/PREDICTED: mitochondrial import receptor subunit TOM22 homolog [Crassostrea gigas]	O17287/3e-19/TOM22_CAEEL Mitochondrial import receptor subunit TOM22 homolog OS=Caenorhabditis elegans OX=6239 GN=tomm-22 PE=3 SV=1	crg:105332565/8e-38/mitochondrial import receptor subunit TOM22 homolog; K17769 mitochondrial import receptor subunit TOM22	7292404/5e-25/[U] KOG4111 Translocase of outer mitochondrial membrane complex, subunit TOM22	A0A210Q3C0/2e-35/A0A210Q3C0_MIZYE Mitochondrial import receptor subunit TOM22-like OS=Mizuhopecten yessoensis OX=6573 GN=KP79_PYT06550 PE=4 SV=1	PTHR12504/7.4E-38/--	1|IPR005683; Mitochondrial import receptor subunit Tom22	biological_process:GO:0006886//intracellular protein transport;cellular_component:GO:0005741//mitochondrial outer membrane;
227_1	2.43211	NA	30036	GCTATLGNFAK	1	1	1	0.0397	16735	0	0	XP_019924446.1/1.92658e-165/PREDICTED: 40S ribosomal protein S2 [Crassostrea gigas]	Q90YS3/9e-157/RS2_ICTPU 40S ribosomal protein S2 OS=Ictalurus punctatus OX=7998 GN=rps2 PE=2 SV=1	crg:105332191/3e-166/40S ribosomal protein S2; K02981 small subunit ribosomal protein S2e	Hs15055539/4e-156/[J] KOG0877 40S ribosomal protein S2/30S ribosomal protein S5	A0A077GZK0/2e-163/A0A077GZK0_MYTTR Ribosomal protein S2 (Fragment) OS=Mytilus trossulus OX=6551 PE=2 SV=1	PTHR13718/1.6E-131/--	4|IPR000851; Ribosomal protein S5|IPR005324; Ribosomal protein S5, C-terminal|IPR013810; Ribosomal protein S5, N-terminal|IPR018192; Ribosomal protein S5, N-terminal, conserved site	biological_process:GO:0006412//translation;cellular_component:GO:0005840//ribosome;molecular_function:GO:0003723//RNA binding;GO:0003735//structural constituent of ribosome;
447_1	4.72595	NA	82105.1	YSEQFDVMDR;YVISAVSWWGHK	1;1	2	2	0.0314	20765;24187	0	0	XP_022314527.1/0/eukaryotic translation initiation factor 3 subunit B-like [Crassostrea virginica] &gt;XP_022319223.1 eukaryotic translation initiation factor 3 subunit B-like [Crassostrea virginica]	Q8JZQ9/0.0/EIF3B_MOUSE Eukaryotic translation initiation factor 3 subunit B OS=Mus musculus OX=10090 GN=Eif3b PE=1 SV=1	crg:105332194/0.0/eukaryotic translation initiation factor 3 subunit B; K03253 translation initiation factor 3 subunit B	Hs4503527/0.0/[J] KOG2314 Translation initiation factor 3, subunit b (eIF-3b)	K1R9T2/0.0/K1R9T2_CRAGI Eukaryotic translation initiation factor 3 subunit B OS=Crassostrea gigas OX=29159 GN=CGI_10021675 PE=3 SV=1	PF00076/1.8E-7/RNA recognition motif. (a.k.a. RRM, RBD, or RNP domain)	3|IPR000504; RNA recognition motif domain|IPR011400; Eukaryotic translation initiation factor 3 subunit B|IPR013979; Translation initiation factor, beta propellor-like domain	biological_process:GO:0006413//translational initiation;cellular_component:GO:0005852//eukaryotic translation initiation factor 3 complex;molecular_function:GO:0003676//nucleic acid binding;GO:0003723//RNA binding;GO:0003743//translation initiation factor activity;GO:0031369//translation initiation factor binding;biological_process:GO:0006446//regulation of translational initiation;GO:0001731//fo…
187_1	16.6178	NA	16919.6	DTNFGTNCICR;IVECVHCGCR;KPPPDGWELIEPTIDELDQK;QGYENLCCLR;VEGLWPIFR	1;1;1;1;1	5	6	0.4167	22519;20766;20767;31032;21338;16154	1.06488e+06	118320	XP_022315764.1/4.11952e-100/protein BUD31 homolog [Crassostrea virginica] &gt;XP_022316279.1 protein BUD31 homolog [Crassostrea virginica]	Q962X9/3e-99/BUD31_BRABE Protein BUD31 homolog OS=Branchiostoma belcheri OX=7741 PE=2 SV=1	crg:105331507/3e-100/protein BUD31 homolog; K12873 bud site selection protein 31	7292624/8e-95/[K] KOG3404 G10 protein/predicted nuclear transcription regulator	A0A210R4H8/9e-99/A0A210R4H8_MIZYE Protein BUD31-like OS=Mizuhopecten yessoensis OX=6573 GN=KP79_PYT06559 PE=4 SV=1	PF01125/2.4E-67/G10 protein	2|IPR001748; G10 protein|IPR018230; BUD31/G10-related, conserved site	cellular_component:GO:0005634//nucleus;cellular_component:GO:0005634//nucleus;
717_1	10.3301	NA	87956.2	ANPNIIVDDVDK;ATDDDPFLDPR;SAFEWLTK	1;1;1	3	3	0.0385	21346;20050;12608	279773	7993.51	XP_022316450.1/8.13249e-136/UV excision repair protein RAD23 homolog B-like [Crassostrea virginica]	P54728/2e-121/RD23B_MOUSE UV excision repair protein RAD23 homolog B OS=Mus musculus OX=10090 GN=Rad23b PE=1 SV=2	npr:108801587/3e-123/RAD23B; UV excision repair protein RAD23 homolog B isoform X1; K10839 UV excision repair protein RAD23	Hs4506387/3e-121/[L] KOG0011 Nucleotide excision repair factor NEF2, RAD23 component	A0A2C9JQB6/1e-131/A0A2C9JQB6_BIOGL Uncharacterized protein OS=Biomphalaria glabrata OX=6526 GN=106063577 PE=4 SV=1	SM00165/7.4E-8/--	6|IPR000626; Ubiquitin domain|IPR001841; Zinc finger, RING-type|IPR004806; UV excision repair protein Rad23|IPR006636; Heat shock chaperonin-binding|IPR015360; XPC-binding domain|IPR015940; Ubiquitin-associated domain	biological_process:GO:0006289//nucleotide-excision repair;GO:0043161//proteasome-mediated ubiquitin-dependent protein catabolic process;cellular_component:GO:0005634//nucleus;molecular_function:GO:0003684//damaged DNA binding;GO:0005515//protein binding;biological_process:GO:0043161//proteasome-mediated ubiquitin-dependent protein catabolic process;GO:0006289//nucleotide-excision repair;cellular_…
203_1	5.40124	NA	51624.2	DISQYTGATEHIR;SYFEFSNK	1;1	2	2	0.0463	25243;13537	25410.8	794.089	XP_022314795.1/0/protein FAM49B-like isoform X6 [Crassostrea virginica] &gt;XP_022314916.1 protein FAM49B-like isoform X6 [Crassostrea virginica]	Q9NUQ9/8e-139/FA49B_HUMAN Protein FAM49B OS=Homo sapiens OX=9606 GN=FAM49B PE=1 SV=1	egl:EGR_01166/3e-35/Vacuolar protein sorting-associated protein 4A; K12196 vacuolar protein-sorting-associated protein 4	Hs14741010/3e-139/[S] KOG3951 Uncharacterized conserved protein	K1RAR8/0.0/K1RAR8_CRAGI Protein FAM49B OS=Crassostrea gigas OX=29159 GN=CGI_10021231 PE=4 SV=1	PTHR12422/1.0E-152/--	1|IPR009828; Protein of unknown function DUF1394	NA
548_2	5.93826	NA	162206	EALHLFTSFIK;EALHVFNSFIK;ETQPYTAWGLR	1;0;1	2	3	0.0234	21187;21185;21165;21567	223409	3490.77	XP_021358320.1/2.49296e-118/lysosomal protective protein-like [Mizuhopecten yessoensis]	Q3MI05/5e-110/PPGB_BOVIN Lysosomal protective protein OS=Bos taurus OX=9913 GN=CTSA PE=2 SV=1	cel:CELE_Y16B4A.2/0.0/Y16B4A.2; Carboxypeptidase; K13289 cathepsin A (carboxypeptidase C) [EC:3.4.16.5]	CE21374/0.0/[OE] KOG1282 Serine carboxypeptidases (lysosomal cathepsin A)	A0A2G5T1A6/0.0/A0A2G5T1A6_9PELO Carboxypeptidase OS=Caenorhabditis nigoni OX=1611254 GN=Cni-Y16B4A.2 PE=3 SV=1	PR00724/3.4E-25/Carboxypeptidase C serine protease (S10) family signature	3|IPR001563; Peptidase S10, serine carboxypeptidase|IPR018202; Serine carboxypeptidase, serine active site|IPR033124; Serine carboxypeptidases, histidine active site	biological_process:GO:0006508//proteolysis;molecular_function:GO:0004185//serine-type carboxypeptidase activity;molecular_function:GO:0004185//serine-type carboxypeptidase activity;
909_1	7.10212	NA	64487.9	NAVASETSGDYEK;SEIDLQNIK	1;1	2	2	0.0361	22872;14482	1.51395e+06	54069.7	XP_022315758.1/0/annexin A4-like [Crassostrea virginica]	P20073/4e-135/ANXA7_HUMAN Annexin A7 OS=Homo sapiens OX=9606 GN=ANXA7 PE=1 SV=3	myi:110448544/0.0/annexin A7-like; K17095 annexin A7/11	Hs4809279/2e-135/[U] KOG0819 Annexin	A0A210QSV8/0.0/A0A210QSV8_MIZYE Annexin OS=Mizuhopecten yessoensis OX=6573 GN=KP79_PYT05600 PE=3 SV=1	PS00223/-/Annexins repeated domain signature.	5|IPR001464; Annexin|IPR013286; Annexin A7|IPR018252; Annexin repeat, conserved site|IPR018502; Annexin repeat|IPR034309; Annexin A7, chordates	molecular_function:GO:0005509//calcium ion binding;GO:0005544//calcium-dependent phospholipid binding;molecular_function:GO:0005544//calcium-dependent phospholipid binding;GO:0005509//calcium ion binding;
188_1	13.6308	NA	47901.9	FEWTAGK;HEQNIDCGGGYLK;LDKPFSNEGK;VHVIFNYK	1;1;1;1	4	4	0.0918	9416;25237;16645;13512	775862	28735.6	ABR68546.1/0/calreticulin [Pinctada fucata]	P29413/0.0/CALR_DROME Calreticulin OS=Drosophila melanogaster OX=7227 GN=Calr PE=1 SV=2	crg:105336966/0.0/Crt; calreticulin precursor; K08057 calreticulin	7299219/0.0/[O] KOG0674 Calreticulin	A6YIE3/0.0/A6YIE3_PINFU Calreticulin OS=Pinctada fucata OX=50426 PE=2 SV=1	PTHR11073:SF19/2.6E-195/--	2|IPR001580; Calreticulin/calnexin|IPR018124; Calreticulin/calnexin, conserved site	biological_process:GO:0006457//protein folding;cellular_component:GO:0005783//endoplasmic reticulum;molecular_function:GO:0005509//calcium ion binding;GO:0051082//unfolded protein binding;biological_process:GO:0006457//protein folding;cellular_component:GO:0005783//endoplasmic reticulum;molecular_function:GO:0051082//unfolded protein binding;GO:0005509//calcium ion binding;
760_1	12.7527	NA	14823.9	HGYIGEFEIVDDHR;IVVNLTGR;MNVLSDALR;WTTNLLPSR	1;1;1;1	4	6	0.3077	27425;27423;10182;13482;13865;15297	6.23039e+06	566399	XP_021374413.1/2.35464e-87/40S ribosomal protein S15Aa [Mizuhopecten yessoensis]	Q6XIM8/3e-84/RS15A_DROYA 40S ribosomal protein S15a OS=Drosophila yakuba OX=7245 GN=RpS15Aa PE=2 SV=3	myi:110463846/4e-88/40S ribosomal protein S15Aa; K02957 small subunit ribosomal protein S15Ae	7292864/2e-84/[J] KOG1754 40S ribosomal protein S15/S22	A0A0A0QYD8/3e-84/A0A0A0QYD8_9ANNE 40S ribosomal protein OS=Phragmatopoma lapidosa OX=341668 PE=2 SV=1	PS00053/-/Ribosomal protein S8 signature.	1|IPR000630; Ribosomal protein S8	biological_process:GO:0006412//translation;cellular_component:GO:0005840//ribosome;molecular_function:GO:0003735//structural constituent of ribosome;biological_process:GO:0006412//translation;cellular_component:GO:0005840//ribosome;molecular_function:GO:0003735//structural constituent of ribosome;
107_1	4.33022	NA	30048.7	FYDANYQGQEYDALATR	1	1	1	0.0634	29589	342559	20150.5	XP_022315627.1/1.24572e-123/microtubule-associated protein RP/EB family member 1-like isoform X9 [Crassostrea virginica]	Q6P848/2e-104/MARE1_XENTR Microtubule-associated protein RP/EB family member 1 OS=Xenopus tropicalis OX=8364 GN=mapre1 PE=2 SV=1	crg:105346663/2e-117/microtubule-associated protein RP/EB family member 1 isoform X1; K10436 microtubule-associated protein, RP/EB family	7302298/1e-106/[DZ] KOG3000 Microtubule-binding protein involved in cell cycle control	A0A2C9K0T0/3e-117/A0A2C9K0T0_BIOGL Uncharacterized protein OS=Biomphalaria glabrata OX=6526 GN=106075886 PE=4 SV=1	PF03271/1.0E-16/EB1-like C-terminal motif	4|IPR001715; Calponin homology domain|IPR004953; EB1, C-terminal|IPR027328; Microtubule-associated protein RP/EB|IPR027739; EB1, Metazoa	biological_process:GO:0070507//regulation of microtubule cytoskeleton organization;molecular_function:GO:0005515//protein binding;GO:0008017//microtubule binding;GO:0051010//microtubule plus-end binding;
582_1	6.73564	NA	22888.5	NLADYLR;YYTENLTQDK	1;1	2	2	0.0846	10040;20355	65714.3	4380.95	XP_022317787.1/1.25699e-128/proteasome subunit beta type-2-like [Crassostrea virginica]	Q5E9K0/9e-97/PSB2_BOVIN Proteasome subunit beta type-2 OS=Bos taurus OX=9913 GN=PSMB2 PE=1 SV=1	crg:105346718/1e-128/proteasome subunit beta type-2; K02734 20S proteasome subunit beta 4 [EC:3.4.25.1]	Hs4506195/1e-95/[O] KOG0177 20S proteasome, regulatory subunit beta type PSMB2/PRE1	K1PDC6/1e-127/K1PDC6_CRAGI Proteasome subunit beta OS=Crassostrea gigas OX=29159 GN=CGI_10003170 PE=3 SV=1	PTHR11599/2.9E-87/--	4|IPR001353; Proteasome, subunit alpha/beta|IPR016050; Proteasome beta-type subunit, conserved site|IPR023333; Proteasome B-type subunit|IPR035206; Proteasome subunit beta 2	biological_process:GO:0051603//proteolysis involved in cellular protein catabolic process;cellular_component:GO:0005839//proteasome core complex;molecular_function:GO:0004175//endopeptidase activity;GO:0004298//threonine-type endopeptidase activity;biological_process:GO:0051603//proteolysis involved in cellular protein catabolic process;cellular_component:GO:0005634//nucleus;GO:0005737//cytoplasm…
771_1	2.50519	NA	306106	TELEQYR	1	1	1	0.0027	11696	227441	1166.37	EKC26666.1/0/Centromere-associated protein E [Crassostrea gigas]	Q02224/1e-114/CENPE_HUMAN Centromere-associated protein E OS=Homo sapiens OX=9606 GN=CENPE PE=1 SV=2	myi:110441107/6e-171/centromere-associated protein E-like; K11498 centromeric protein E	Hs4502781_1/8e-120/[Z] KOG0242 Kinesin-like protein	K1QYR3/0.0/K1QYR3_CRAGI Centromere-associated protein E OS=Crassostrea gigas OX=29159 GN=CGI_10001569 PE=3 SV=1	SM00129/4.8E-135/--	3|IPR001752; Kinesin motor domain|IPR019821; Kinesin motor domain, conserved site|IPR027640; Kinesin-like protein	biological_process:GO:0007018//microtubule-based movement;molecular_function:GO:0003777//microtubule motor activity;GO:0005524//ATP binding;GO:0008017//microtubule binding;
671_1	6.86638	NA	106683	DDGTVIHFNNPK;QLQEQVR	1;1	2	3	0.02	22496;22495;10834	1.25875e+06	24681.4	XP_013388573.1/2.17878e-127/PREDICTED: uncharacterized protein LOC106157457 [Lingula anatina]	Q64152/5e-58/BTF3_MOUSE Transcription factor BTF3 OS=Mus musculus OX=10090 GN=Btf3 PE=1 SV=3	crg:105344819/7e-81/transcription factor BTF3 homolog 4; K01527 nascent polypeptide-associated complex subunit beta	Hs22051950/5e-59/[K] KOG2240 RNA polymerase II general transcription factor BTF3 and related proteins	A0A1S3HRB5/4e-127/A0A1S3HRB5_LINUN uncharacterized protein LOC106157457 OS=Lingula unguis OX=7574 GN=LOC106157457 PE=4 SV=1	PF10551/5.0E-7/MULE transposase domain	3|IPR002715; Nascent polypeptide-associated complex NAC domain|IPR003323; OTU domain|IPR018289; MULE transposase domain	biological_process:GO:0006886//intracellular protein transport;GO:0016192//vesicle-mediated transport;cellular_component:GO:0030131//clathrin adaptor complex;molecular_function:GO:0046872//metal ion binding;
278_1	8.03687	NA	34093.2	DSQGYIGFVFK;FGDQILQINGK;IGDIIDAGGR	1;1;1	3	3	0.1019	20032;19306;12693	1.49588e+06	87993	XP_022313968.1/0/syntenin-1-like [Crassostrea virginica] &gt;XP_022313969.1 syntenin-1-like [Crassostrea virginica] &gt;XP_022313970.1 syntenin-1-like [Crassostrea virginica]	Q9JI92/1e-118/SDCB1_RAT Syntenin-1 OS=Rattus norvegicus OX=10116 GN=Sdcbp PE=1 SV=1	crg:105331551/0.0/syntenin-1; K17254 syntenin-1	CE27060_2/3e-11/[S] KOG3528 FOG: PDZ domain	K1QH68/3e-166/K1QH68_CRAGI Syntenin-1 OS=Crassostrea gigas OX=29159 GN=CGI_10024846 PE=4 SV=1	PF00595/2.5E-11/PDZ domain (Also known as DHR or GLGF)	2|IPR001478; PDZ domain|IPR030528; Syntenin-1	biological_process:GO:0007268//chemical synaptic transmission;GO:0030036//actin cytoskeleton organization;GO:0035556//intracellular signal transduction;molecular_function:GO:0005515//protein binding;
440_1	2.63563	NA	59709.2	AGVAEVVYTQK	1	1	1	0.0199	17449	0	0	EKC35650.1/2.3068e-72/Polymerase delta-interacting protein 3 [Crassostrea gigas]	Q9BY77/5e-17/PDIP3_HUMAN Polymerase delta-interacting protein 3 OS=Homo sapiens OX=9606 GN=POLDIP3 PE=1 SV=2	crg:105329478/2e-71/polymerase delta-interacting protein 3; K22414 polymerase delta-interacting protein 3	Hs14779319/2e-17/[A] KOG0533 RRM motif-containing protein	K1R3D0/4e-72/K1R3D0_CRAGI Polymerase delta-interacting protein 3 OS=Crassostrea gigas OX=29159 GN=CGI_10020341 PE=4 SV=1	PF00076/3.5E-11/RNA recognition motif. (a.k.a. RRM, RBD, or RNP domain)	2|IPR000504; RNA recognition motif domain|IPR034785; Polymerase delta-interacting protein 3	biological_process:GO:0006406//mRNA export from nucleus;molecular_function:GO:0003676//nucleic acid binding;GO:0003723//RNA binding;
143_1	12.2875	NA	30014.4	DALGHTFATR;ESLPLILFLR;GNKPWISLPR;GVPYITTHDAR	1;1;1;1	4	4	0.1547	15318;18427;17528;19194	2.01784e+06	106202	XP_022290789.1/3.0107e-169/40S ribosomal protein S4-like [Crassostrea virginica] &gt;XP_022294012.1 40S ribosomal protein S4-like [Crassostrea virginica]	Q4PMB3/1e-156/RS4_IXOSC 40S ribosomal protein S4 OS=Ixodes scapularis OX=6945 GN=RpS4 PE=2 SV=1	myi:110460266/5e-170/40S ribosomal protein S4-like; K02987 small subunit ribosomal protein S4e	Hs4506725/5e-152/[J] KOG0378 40S ribosomal protein S4	A0A194AMZ1/0.0/A0A194AMZ1_PINFU 40S ribosomal protein S4 OS=Pinctada fucata OX=50426 PE=3 SV=1	PF01479/1.6E-6/S4 domain	6|IPR000876; Ribosomal protein S4e|IPR002942; RNA-binding S4 domain|IPR005824; KOW|IPR013843; Ribosomal protein S4e, N-terminal|IPR013845; Ribosomal protein S4e, central region|IPR032277; 40S ribosomal protein S4, C-terminal domain	biological_process:GO:0006412//translation;cellular_component:GO:0005622//intracellular;GO:0005840//ribosome;molecular_function:GO:0003723//RNA binding;GO:0003735//structural constituent of ribosome;
247_1	9.4194	NA	20308.5	DYEDDEEVNK;ETADVISK;LIEDFLAR	1;1;1	3	3	0.1444	19896;10007;12527	369082	36908.2	XP_011425466.1/5.16407e-112/PREDICTED: trafficking protein particle complex subunit 3 [Crassostrea gigas] &gt;EKC33233.1 Trafficking protein particle complex subunit 3 [Crassostrea gigas]	Q5ZI57/2e-98/TPPC3_CHICK Trafficking protein particle complex subunit 3 OS=Gallus gallus OX=9031 GN=TRAPPC3 PE=2 SV=1	crg:105326926/8e-113/trafficking protein particle complex subunit 3; K20302 trafficking protein particle complex subunit 3	Hs7656926/3e-96/[U] KOG3330 Transport protein particle (TRAPP) complex subunit	K1QH85/9e-112/K1QH85_CRAGI Trafficking protein particle complex subunit OS=Crassostrea gigas OX=29159 GN=CGI_10022209 PE=3 SV=1	PF04051/7.1E-37/Transport protein particle (TRAPP) component	2|IPR007194; Transport protein particle (TRAPP) component|IPR016721; Bet3 family	biological_process:GO:0048193//Golgi vesicle transport;cellular_component:GO:0030008//TRAPP complex;biological_process:GO:0048193//Golgi vesicle transport;cellular_component:GO:0005783//endoplasmic reticulum;GO:0005794//Golgi apparatus;GO:0030008//TRAPP complex;
850_1	6.86638	NA	19279.9	HTLIVADSK;QHKPLLYR	1;1	2	2	0.096	12646;14331	51750.4	5175.04	XP_011452894.1/4.0765e-103/PREDICTED: dolichyl-diphosphooligosaccharide--protein glycosyltransferase 48 kDa subunit-like [Crassostrea gigas]	O54734/1e-83/OST48_MOUSE Dolichyl-diphosphooligosaccharide--protein glycosyltransferase 48 kDa subunit OS=Mus musculus OX=10090 GN=Ddost PE=1 SV=2	crg:105346120/6e-104/dolichyl-diphosphooligosaccharide--protein glycosyltransferase 48 kDa subunit-like; K12670 oligosaccharyltransferase complex subunit beta	Hs20070197/2e-82/[O] KOG2754 Oligosaccharyltransferase, beta subunit	A0A210Q3Z9/3e-97/A0A210Q3Z9_MIZYE Dolichyl-diphosphooligosaccharide--protein glycosyltransferase 48 kDa subunit OS=Mizuhopecten yessoensis OX=6573 GN=KP79_PYT21802 PE=3 SV=1	PTHR10830/3.9E-62/--	1|IPR005013; Dolichyl-diphosphooligosaccharide--protein glycosyltransferase 48kDa subunit	biological_process:GO:0018279//protein N-linked glycosylation via asparagine;cellular_component:GO:0005789//endoplasmic reticulum membrane;
615_1	35.81	NA	85360.4	APDFVFYASR;EDAMMEYLK;FVIKPIDK;IAQDLEMYGVNYFPIK;ITNWWSEHK;MFFLQVK;NDILHEQNVR;NISFNDK;QLFDQVVK;YGDEGTGKPDSLTNDR;YNSLTEQVK	1;1;1;1;1;1;1;1;1;1;1	11	13	0.1503	17655;16505;12161;28822;28900;18411;18410;11103;19404;9401;12528;27703;15122	4.59587e+06	97784.5	XP_022292008.1/0/radixin-like isoform X4 [Crassostrea virginica]	B0WYY2/0.0/MOEH_CULQU Moesin/ezrin/radixin homolog 1 OS=Culex quinquefasciatus OX=7176 GN=Moe PE=3 SV=1	crg:105346280/0.0/radixin isoform X2; K05762 radixin	Hs4506467/0.0/[R] KOG3529 Radixin, moesin and related proteins of the ERM family	K1PUJ1/0.0/K1PUJ1_CRAGI Radixin OS=Crassostrea gigas OX=29159 GN=CGI_10017309 PE=4 SV=1	PTHR23281:SF18/2.0E-231/--	8|IPR000299; FERM domain|IPR000798; Ezrin/radixin/moesin-like|IPR011259; Ezrin/radixin/moesin, C-terminal|IPR018979; FERM, N-terminal|IPR018980; FERM, C-terminal PH-like domain|IPR019747; FERM conserved site|IPR019748; FERM central domain|IPR019749; Band 4.1 domain	cellular_component:GO:0005856//cytoskeleton;molecular_function:GO:0008092//cytoskeletal protein binding;
333_1	2.07466	NA	27612.9	DFGSVEDMK	1	1	1	0.037	13687	138809	12619	AGS15319.1/2.62019e-132/manganese superoxide dismutase [Pinctada fucata]	Q8HXP6/4e-101/SODM_PONPY Superoxide dismutase [Mn], mitochondrial OS=Pongo pygmaeus OX=9600 GN=SOD2 PE=2 SV=3	myi:110454894/2e-118/superoxide dismutase [Mn], mitochondrial-like; K04564 superoxide dismutase, Fe-Mn family [EC:1.15.1.1]	Hs10835187/1e-99/[P] KOG0876 Manganese superoxide dismutase	S5S578/5e-132/S5S578_PINFU Superoxide dismutase OS=Pinctada fucata OX=50426 PE=3 SV=1	PTHR11404:SF6/3.0E-90/--	4|IPR001189; Manganese/iron superoxide dismutase|IPR019831; Manganese/iron superoxide dismutase, N-terminal|IPR019832; Manganese/iron superoxide dismutase, C-terminal|IPR019833; Manganese/iron superoxide dismutase, binding site	biological_process:GO:0006801//superoxide metabolic process;GO:0055114//oxidation-reduction process;molecular_function:GO:0004784//superoxide dismutase activity;GO:0046872//metal ion binding;
395_1	14.989	NA	48979.3	AVYEANVPDGFR;EWVPPKPGIPK;FQAILSNLLK;NLGVHVSR;YCVDCDAK	1;1;1;1;1	5	6	0.1111	22060;19715;19714;16991;10436;13778	1.65529e+06	110352	XP_021359593.1/5.3317e-154/stromal membrane-associated protein 1-like isoform X4 [Mizuhopecten yessoensis]	Q91VZ6/1e-72/SMAP1_MOUSE Stromal membrane-associated protein 1 OS=Mus musculus OX=10090 GN=Smap1 PE=1 SV=1	myi:110454427/3e-153/stromal membrane-associated protein 1-like isoform X1; K12486 stromal membrane-associated protein	Hs16799069/1e-28/[T] KOG0705 GTPase-activating protein Centaurin gamma (contains Ras-like GTPase, PH and ankyrin repeat domains)	A0A210QF67/1e-141/A0A210QF67_MIZYE Stromal membrane-associated protein 1 OS=Mizuhopecten yessoensis OX=6573 GN=KP79_PYT08176 PE=4 SV=1	PF01412/1.3E-42/Putative GTPase activating protein for Arf	1|IPR001164; Arf GTPase activating protein	molecular_function:GO:0005096//GTPase activator activity;
751_1	16.2795	NA	19129.1	DEASPYAAMLAAQDVAEK;EQVEQVSLGPQVK;TLGINALHIK;TPGPGAQSALR	1;1;1;1	4	5	0.2889	28695;24356;15046;15048;14325	2.68944e+07	2.68944e+06	XP_006039696.1/7.35718e-86/PREDICTED: 40S ribosomal protein S14-like, partial [Bubalus bubalis]	P62264/1e-82/RS14_MOUSE 40S ribosomal protein S14 OS=Mus musculus OX=10090 GN=Rps14 PE=1 SV=3	crg:105339837/2e-89/40S ribosomal protein S14; K02955 small subunit ribosomal protein S14e	Hs5032051/5e-83/[J] KOG0407 40S ribosomal protein S14	A0A3Q7WN77/1e-83/A0A3Q7WN77_URSAR 40S ribosomal protein S14 isoform X1 OS=Ursus arctos horribilis OX=116960 GN=RPS14 PE=3 SV=1	PTHR11759:SF11/2.7E-83/--	2|IPR001971; Ribosomal protein S11|IPR018102; Ribosomal S11, conserved site	biological_process:GO:0006412//translation;cellular_component:GO:0005840//ribosome;molecular_function:GO:0003735//structural constituent of ribosome;biological_process:GO:0000462//maturation of SSU-rRNA from tricistronic rRNA transcript (SSU-rRNA, 5.8S rRNA, LSU-rRNA);GO:0043249//erythrocyte maturation;GO:0043009//chordate embryonic development;GO:0000028//ribosomal small subunit assembly;GO:0048…
845_1	4.83753	NA	48321.1	FNSLDELVDYHR;YFLWVVR	1;1	2	2	0.045	25552;12625	46052.7	1535.09	XP_011429050.1/2.42272e-99/PREDICTED: growth factor receptor-bound protein 2 isoform X1 [Crassostrea gigas]	Q6YKA8/4e-85/DRK_DROSI Protein E(sev)2B OS=Drosophila simulans OX=7240 GN=drk PE=3 SV=1	crg:105329475/4e-100/growth factor receptor-bound protein 2 isoform X1; K04364 growth factor receptor-binding protein 2	7303308/2e-85/[T] KOG3601 Adaptor protein GRB2, contains SH2 and SH3 domains	A0A2T7PX05/6e-90/A0A2T7PX05_POMCA Uncharacterized protein OS=Pomacea canaliculata OX=400727 GN=C0Q70_00519 PE=4 SV=1	SM00252/1.1E-31/--	3|IPR000980; SH2 domain|IPR001452; SH3 domain|IPR030219; Growth factor receptor-bound protein 2	biological_process:GO:0007265//Ras protein signal transduction;molecular_function:GO:0005515//protein binding;biological_process:GO:0007265//Ras protein signal transduction;cellular_component:GO:0005622//intracellular;
219_1	2.96913	NA	17986	SQWSPALTISK	1	1	1	0.0683	18855	1.54006e+06	385014	XP_011686504.1/2.49577e-75/PREDICTED: ubiquitin-conjugating enzyme E2-17 kDa isoform X1 [Wasmannia auropunctata]	P25867/3e-76/UBCD1_DROME Ubiquitin-conjugating enzyme E2-17 kDa OS=Drosophila melanogaster OX=7227 GN=eff PE=2 SV=1	spis:111336619/2e-76/ubiquitin-conjugating enzyme E2-17 kDa isoform X1; K06689 ubiquitin-conjugating enzyme E2 D [EC:2.3.2.23]	7299919/1e-76/[O] KOG0417 Ubiquitin-protein ligase	A0A147B8E9/7e-75/A0A147B8E9_9ACAR Ubiquitin conjugating enzyme (Fragment) OS=Carios mimon OX=360319 PE=3 SV=1	PS00183/-/Ubiquitin-conjugating enzymes active site.	2|IPR000608; Ubiquitin-conjugating enzyme E2|IPR023313; Ubiquitin-conjugating enzyme, active site	molecular_function:GO:0005524//ATP binding;
436_1	2.96913	NA	16690.5	TEIALSPNNSDVK	1	1	2	0.089	23261;23299	199355	22150.6	XP_022312934.1/6.02417e-74/LOW QUALITY PROTEIN: actin-related protein 2/3 complex subunit 1A-like [Crassostrea virginica]	Q92747/6e-72/ARC1A_HUMAN Actin-related protein 2/3 complex subunit 1A OS=Homo sapiens OX=9606 GN=ARPC1A PE=2 SV=2	crg:105321017/1e-72/actin-related protein 2/3 complex subunit 1A; K05757 actin related protein 2/3 complex, subunit 1A/1B	Hs5454078/3e-72/[Z] KOG1523 Actin-related protein Arp2/3 complex, subunit ARPC1/p41-ARC	B3XZN5/2e-73/B3XZN5_9BIVA Actin-related protein 2/3 complex subunit OS=Saccostrea kegaki OX=182713 PE=2 SV=1	PS50294/10.443/Trp-Asp (WD) repeats circular profile.	3|IPR001680; WD40 repeat|IPR017383; Actin-related protein 2/3 complex subunit 1|IPR017986; WD40-repeat-containing domain	biological_process:GO:0030833//regulation of actin filament polymerization;GO:0034314//Arp2/3 complex-mediated actin nucleation;cellular_component:GO:0005885//Arp2/3 protein complex;GO:0015629//actin cytoskeleton;molecular_function:GO:0005515//protein binding;
777_1	11.9801	NA	25291.5	DGQMIIWDFK;HQNTITQVSIYAGDK;LLTYSDDGK;SLEQSIAGLK	1;1;1;1	4	4	0.1905	20216;27343;13267;14103	601031	42930.8	BAG55010.1/3.02056e-115/actin-related protein 2/3 [Saccostrea kegaki]	Q92747/4e-93/ARC1A_HUMAN Actin-related protein 2/3 complex subunit 1A OS=Homo sapiens OX=9606 GN=ARPC1A PE=2 SV=2	crg:105321017/1e-114/actin-related protein 2/3 complex subunit 1A; K05757 actin related protein 2/3 complex, subunit 1A/1B	Hs5454078/4e-92/[Z] KOG1523 Actin-related protein Arp2/3 complex, subunit ARPC1/p41-ARC	B3XZN5/6e-115/B3XZN5_9BIVA Actin-related protein 2/3 complex subunit OS=Saccostrea kegaki OX=182713 PE=2 SV=1	PTHR10709/1.8E-88/--	3|IPR001680; WD40 repeat|IPR017383; Actin-related protein 2/3 complex subunit 1|IPR030140; Actin-related protein 2/3 complex subunit 1A	biological_process:GO:0030833//regulation of actin filament polymerization;GO:0034314//Arp2/3 complex-mediated actin nucleation;cellular_component:GO:0005885//Arp2/3 protein complex;GO:0015629//actin cytoskeleton;molecular_function:GO:0005515//protein binding;
497_1	4.33022	NA	39121.7	IYQEAGGDVNK	1	1	1	0.0318	18195	16495.5	970.324	XP_011429031.1/1.33795e-169/PREDICTED: phosphotriesterase-related protein [Crassostrea gigas] &gt;EKC35637.1 Phosphotriesterase-related protein [Crassostrea gigas]	Q7SZS2/4e-135/PTER_XENLA Phosphotriesterase-related protein OS=Xenopus laevis OX=8355 GN=pter PE=2 SV=1	crg:105329463/2e-170/phosphotriesterase-related protein; K07048 phosphotriesterase-related protein	NA	K1QFI9/2e-169/K1QFI9_CRAGI Phosphotriesterase-related protein OS=Crassostrea gigas OX=29159 GN=CGI_10020328 PE=3 SV=1	PTHR10819/2.1E-144/--	1|IPR001559; Phosphotriesterase	biological_process:GO:0009056//catabolic process;molecular_function:GO:0008270//zinc ion binding;biological_process:GO:0009056//catabolic process;molecular_function:GO:0008270//zinc ion binding;GO:0016788//hydrolase activity, acting on ester bonds;
706_1	16.1965	NA	65649.4	DFTNSPLHR;EEFSQYGEVK;HVYVQFSNHK;LSLDGQNIYNGCCTLR;NNTFQALIQMSDPVAANAAK	1;1;1;1;1	5	6	0.1069	15261;18801;19986;28723;28718;29964	1.70932e+06	106832	XP_011436707.1/0/PREDICTED: polypyrimidine tract-binding protein 1 isoform X2 [Crassostrea gigas]	O95758/0.0/PTBP3_HUMAN Polypyrimidine tract-binding protein 3 OS=Homo sapiens OX=9606 GN=PTBP3 PE=1 SV=2	crg:105334827/0.0/polypyrimidine tract-binding protein 1 isoform X1; K13218 polypyrimidine tract-binding protein 1	7302108/0.0/[A] KOG1190 Polypyrimidine tract-binding protein	K1PR25/0.0/K1PR25_CRAGI Regulator of differentiation 1 OS=Crassostrea gigas OX=29159 GN=CGI_10004091 PE=4 SV=1	PF13893/1.4E-34/RNA recognition motif. (a.k.a. RRM, RBD, or RNP domain)	1|IPR000504; RNA recognition motif domain	molecular_function:GO:0003676//nucleic acid binding;
656_1	5.23624	NA	19627.7	AVETGTLK;QVSGTGAAGR	1;1	2	2	0.0963	9062;10526	396719	44079.9	XP_009050221.1/1.6824e-21/hypothetical protein LOTGIDRAFT_177078 [Lottia gigantea] &gt;ESO99091.1 hypothetical protein LOTGIDRAFT_177078 [Lottia gigantea]	Q6NVM0/1e-19/H10_XENTR Histone H1.0 OS=Xenopus tropicalis OX=8364 GN=h1f0 PE=2 SV=1	aqu:100635715/3e-22/histone H1-delta-like; K11275 histone H1/5	Hs18594035/1e-19/[B] KOG4012 Histone H1	A0A1Z5KX19/3e-26/A0A1Z5KX19_ORNMO Uncharacterized protein (Fragment) OS=Ornithodoros moubata OX=6938 PE=3 SV=1	PTHR11467/4.6E-27/--	2|IPR005818; Linker histone H1/H5, domain H15|IPR005819; Histone H5	biological_process:GO:0006334//nucleosome assembly;cellular_component:GO:0000786//nucleosome;GO:0005634//nucleus;molecular_function:GO:0003677//DNA binding;biological_process:GO:0006334//nucleosome assembly;cellular_component:GO:0005634//nucleus;GO:0000786//nucleosome;molecular_function:GO:0003677//DNA binding;
3_2	5.93826	NA	92429.4	AFVHWYVGEGMEEGEFSEAR;AVCMLSNTTAIAEAWAR;DVNAAIATIK;EDAANNYAR;EIIDLVLDR;EIVDLVLDR;FDLMYAK;QLFHPEQLVTGK;TIQFVDWCPTGFK;VGINYQPPTVVPGGDLAK	0;0;0;0;1;0;0;1;0;0	2	2	0.1496	31072;31125;28704;13407;13582;15209;14855;10548;23455;26668;28346	126388	2939.26	ERL87325.1/0/hypothetical protein D910_04720, partial [Dendroctonus ponderosae]	Q68FR8/0.0/TBA3_RAT Tubulin alpha-3 chain OS=Rattus norvegicus OX=10116 GN=Tuba3a PE=2 SV=1	eai:106840555/0.0/tubulin alpha-1D chain-like; K07374 tubulin alpha	Hs17921993/0.0/[Z] KOG1376 Alpha tubulin	U4UBK4/0.0/U4UBK4_DENPD Uncharacterized protein (Fragment) OS=Dendroctonus ponderosae OX=77166 GN=D910_04720 PE=3 SV=1	PTHR11588:SF243/0.0/--	5|IPR000217; Tubulin|IPR002452; Alpha tubulin|IPR003008; Tubulin/FtsZ, GTPase domain|IPR017975; Tubulin, conserved site|IPR018316; Tubulin/FtsZ, 2-layer sandwich domain	biological_process:GO:0007017//microtubule-based process;cellular_component:GO:0005874//microtubule;molecular_function:GO:0003924//GTPase activity;GO:0005200//structural constituent of cytoskeleton;GO:0005525//GTP binding;
509_1	7.29935	NA	31022.1	HLCSVEEPR;LAILGSGVQAR	1;1	2	2	0.0704	16402;15198	79604.4	5686.03	XP_011454698.1/3.6285e-130/PREDICTED: ketimine reductase mu-crystallin [Crassostrea gigas] &gt;EKC31003.1 Mu-crystallin-like protein [Crassostrea gigas]	O54983/2e-91/CRYM_MOUSE Ketimine reductase mu-crystallin OS=Mus musculus OX=10090 GN=Crym PE=1 SV=1	crg:105347352/6e-131/ketimine reductase mu-crystallin; K18258 thiomorpholine-carboxylate dehydrogenase [EC:1.5.1.25]	Hs4503065/5e-89/[E] KOG3007 Mu-crystallin	K1QAQ4/7e-130/K1QAQ4_CRAGI Mu-crystallin-like protein OS=Crassostrea gigas OX=29159 GN=CGI_10025002 PE=4 SV=1	PTHR13812:SF19/4.0E-87/--	1|IPR003462; Ornithine cyclodeaminase/mu-crystallin	NA
580_1	46.1118	NA	619646	ALNASLEDLDHEDELSGQR;DVEVLEGR;EAIIVPYQAR;EHGIVVEDVDHR;FWLMDCQNVADATR;ILTDDFPR;LMHPIPLNEGEALAAR;NITLTIPIPK;QEHFVEVAR;VAVSPIVTVEPR;VGLQAQPISSDVVAK;VNLLDVADTLK;YATELYR;YFAIVTK	1;1;1;1;1;1;1;1;1;1;1;1;1;1	14	16	0.0285	30013;11193;17311;23606;23605;27717;12524;27752;27859;15974;16103;20177;25614;18424;11175;9478	2.3851e+06	7718.76	XP_021347443.1/0/titin-like [Mizuhopecten yessoensis]	Q01484/0.0/ANK2_HUMAN Ankyrin-2 OS=Homo sapiens OX=9606 GN=ANK2 PE=1 SV=4	myi:110446561/0.0/titin-like; K10380 ankyrin	7295202/0.0/[M] KOG4177 Ankyrin	A0A0L8HBV0/0.0/A0A0L8HBV0_OCTBM Uncharacterized protein OS=Octopus bimaculoides OX=37653 GN=OCBIM_22017953mg PE=4 SV=1	PF00023/2.1E-4/Ankyrin repeat	4|IPR000488; Death domain|IPR000906; ZU5 domain|IPR002110; Ankyrin repeat|IPR020683; Ankyrin repeat-containing domain	biological_process:GO:0007165//signal transduction;molecular_function:GO:0005515//protein binding;
541_1	21.6142	NA	75277.4	AIIDVLGYR;AINEIYK;EDEYDASELK;GMGTDEDALIEILCSR;LMVALANGGR;MENQPVDMNK;NFNPENDSNILR	1;1;1;1;1;1;1	7	7	0.1074	13514;9772;18342;28046;13108;18557;24178	778475	22896.3	XP_022316814.1/0/LOW QUALITY PROTEIN: annexin A4-like [Crassostrea virginica]	P20072/5e-125/ANXA7_BOVIN Annexin A7 OS=Bos taurus OX=9913 GN=ANXA7 PE=1 SV=2	crg:105335793/0.0/annexin A7; K17095 annexin A7/11	Hs4809279/1e-124/[U] KOG0819 Annexin	K1RAI3/0.0/K1RAI3_CRAGI Annexin OS=Crassostrea gigas OX=29159 GN=CGI_10021863 PE=3 SV=1	PF00191/1.9E-26/Annexin	3|IPR001464; Annexin|IPR018252; Annexin repeat, conserved site|IPR018502; Annexin repeat	molecular_function:GO:0005509//calcium ion binding;GO:0005544//calcium-dependent phospholipid binding;
404_1	2.55608	NA	72692.3	ASLVGIVVPDPDVLPK	1	1	1	0.0243	26877	0	0	XP_021350486.1/0/long-chain-fatty-acid--CoA ligase 5-like isoform X2 [Mizuhopecten yessoensis]	P41216/0.0/ACSL1_MOUSE Long-chain-fatty-acid--CoA ligase 1 OS=Mus musculus OX=10090 GN=Acsl1 PE=1 SV=2	myi:110448530/0.0/long-chain-fatty-acid--CoA ligase 1-like isoform X1; K01897 long-chain acyl-CoA synthetase [EC:6.2.1.3]	Hs11276083/0.0/[I] KOG1256 Long-chain acyl-CoA synthetases (AMP-forming)	A0A210QT30/0.0/A0A210QT30_MIZYE Long-chain-fatty-acid--CoA ligase 1 OS=Mizuhopecten yessoensis OX=6573 GN=KP79_PYT05799 PE=4 SV=1	PS00455/-/Putative AMP-binding domain signature.	2|IPR000873; AMP-dependent synthetase/ligase|IPR020845; AMP-binding, conserved site	biological_process:GO:0008152//metabolic process;molecular_function:GO:0003824//catalytic activity;
938_1	13.4374	NA	39055.9	DDANYGVPLR;DGQAMLWDLNEGK;IWDLEGK;LWDLSAGTTTR;YTIQDEGHNDWASCVR	1;1;1;1;1	5	5	0.1615	16240;24969;9984;18938;29097	795544	33147.7	ACJ06767.1/0/receptor for activated C-kinase [Pinctada fucata] &gt;ADW82123.1 activated C kinase 1 receptor [Pinctada martensii]	O42249/0.0/GBLP_ORENI Guanine nucleotide-binding protein subunit beta-2-like 1 OS=Oreochromis niloticus OX=8128 GN=gnb2l1 PE=2 SV=1	crg:105341228/0.0/guanine nucleotide-binding protein subunit beta-2-like 1; K14753 guanine nucleotide-binding protein subunit beta-2-like 1 protein	Hs5174447/0.0/[T] KOG0279 G protein beta subunit-like protein	G9BML3/0.0/G9BML3_PINIB Activated C kinase 1 receptor OS=Pinctada imbricata OX=66713 GN=RACK1 PE=2 SV=1	PS50082/14.652/Trp-Asp (WD) repeats profile.	4|IPR001680; WD40 repeat|IPR017986; WD40-repeat-containing domain|IPR019775; WD40 repeat, conserved site|IPR020472; G-protein beta WD-40 repeat	molecular_function:GO:0005515//protein binding;
931_1	2.55608	NA	35677.5	SPDTNYLFMGDYVDR	1	1	1	0.0481	28164	0	0	XP_011445935.1/0/PREDICTED: serine/threonine-protein phosphatase 2A catalytic subunit beta isoform isoform X1 [Crassostrea gigas] &gt;XP_011445936.1 PREDICTED: serine/threonine-protein phosphatase 2A catalytic subunit beta isoform isoform X1 [Crassostrea gigas] &gt;EKC38582.1 Serine/threonine-protein phosphatase 2A catalytic subunit beta isoform [Crassostrea gigas]	P62716/0.0/PP2AB_RAT Serine/threonine-protein phosphatase 2A catalytic subunit beta isoform OS=Rattus norvegicus OX=10116 GN=Ppp2cb PE=2 SV=1	crg:105341231/0.0/serine/threonine-protein phosphatase 2A catalytic subunit beta isoform isoform X1; K04382 serine/threonine-protein phosphatase 2A catalytic subunit [EC:3.1.3.16]	Hs4758952/0.0/[T] KOG0371 Serine/threonine protein phosphatase 2A, catalytic subunit	K1QNZ3/0.0/K1QNZ3_CRAGI Serine/threonine-protein phosphatase OS=Crassostrea gigas OX=29159 GN=CGI_10025935 PE=3 SV=1	PF00149/4.9E-34/Calcineurin-like phosphoesterase	2|IPR004843; Calcineurin-like phosphoesterase domain, ApaH type|IPR006186; Serine/threonine-specific protein phosphatase/bis(5-nucleosyl)-tetraphosphatase	molecular_function:GO:0016787//hydrolase activity;molecular_function:GO:0004721//phosphoprotein phosphatase activity;
106_1	11.9998	NA	34675.8	FSELGFEPEIR;GVALIINNK;NTPAPGTVVQTR;VDDILAPFK	1;1;1;1	4	4	0.1302	21598;11743;19501;13460	2.1396e+06	101886	EKC34324.1/5.75874e-132/Caspase-7 [Crassostrea gigas]	P55214/2e-88/CASP7_MESAU Caspase-7 OS=Mesocricetus auratus OX=10036 GN=CASP7 PE=1 SV=1	crg:105342048/8e-131/caspase-7-like; K04397 caspase 7 [EC:3.4.22.60]	Hs4502581/1e-87/[D] KOG3573 Caspase, apoptotic cysteine protease	K1QSW8/1e-131/K1QSW8_CRAGI Caspase-7 OS=Crassostrea gigas OX=29159 GN=CGI_10023427 PE=3 SV=1	PF00656/6.6E-53/Caspase domain	6|IPR001309; Peptidase C14, p20 domain|IPR002138; Peptidase C14, caspase non-catalytic subunit p10|IPR015471; Caspase-3/7|IPR015917; Peptidase C14A, caspase catalytic domain|IPR016129; Peptidase family C14A, His active site|IPR033139; Peptidase family C14A, cysteine active site	biological_process:GO:0006508//proteolysis;molecular_function:GO:0004197//cysteine-type endopeptidase activity;GO:0008234//cysteine-type peptidase activity;molecular_function:GO:0004197//cysteine-type endopeptidase activity;
922_1	27.651	NA	22341.3	AMALVVEGR;DKIEPPFPDNPANVIVK;ENVELDLTGDLTK;IEPPFPDNPANVIVK;IQIQFYVQR;NNVMVGSYGPK;QEAQSYTTSAEEAPSGMIAR	1;1;1;1;1;1;1	7	13	0.4031	11837;28790;24458;27096;27097;18237;17892;17480;17906;17905;30085;30165;30164	2.06755e+07	1.37837e+06	XP_011429238.1/3.01363e-80/PREDICTED: rho GDP-dissociation inhibitor 1 isoform X2 [Crassostrea gigas]	Q4R4J0/8e-62/GDIR1_MACFA Rho GDP-dissociation inhibitor 1 OS=Macaca fascicularis OX=9541 GN=ARHGDIA PE=2 SV=1	crg:105329620/6e-79/rho GDP-dissociation inhibitor 1 isoform X1; K12462 Rho GDP-dissociation inhibitor	7293721/4e-68/[T] KOG3205 Rho GDP-dissociation inhibitor	K1QCM0/2e-77/K1QCM0_CRAGI Rho GDP-dissociation inhibitor 1 OS=Crassostrea gigas OX=29159 GN=CGI_10019175 PE=4 SV=1	PF02115/2.7E-66/RHO protein GDP dissociation inhibitor	1|IPR000406; Rho protein GDP-dissociation inhibitor	cellular_component:GO:0005737//cytoplasm;molecular_function:GO:0005094//Rho GDP-dissociation inhibitor activity;
360_1	9.44166	NA	31755.2	SQDIYLR;TAVVVGTVTDDLR;TNRPPLSLAR	1;1;1	3	3	0.1068	10723;22293;16362	707676	44229.8	EKC43150.1/1.83179e-80/60S ribosomal protein L18, partial [Crassostrea gigas]	P12001/1e-71/RL18_RAT 60S ribosomal protein L18 OS=Rattus norvegicus OX=10116 GN=Rpl18 PE=1 SV=2	myi:110446542/5e-78/60S ribosomal protein L18-like; K02883 large subunit ribosomal protein L18e	Hs4506607/5e-70/[J] KOG1714 60s ribosomal protein L18	K1RNH1/3e-80/K1RNH1_CRAGI 60S ribosomal protein L18 (Fragment) OS=Crassostrea gigas OX=29159 GN=CGI_10021165 PE=4 SV=1	PTHR10934/3.2E-55/--	3|IPR000039; Ribosomal protein L18e|IPR021131; Ribosomal protein L18e/L15P|IPR021132; Ribosomal protein L18e, conserved site	biological_process:GO:0006412//translation;cellular_component:GO:0005622//intracellular;GO:0005840//ribosome;molecular_function:GO:0003735//structural constituent of ribosome;biological_process:GO:0006412//translation;cellular_component:GO:0005840//ribosome;molecular_function:GO:0003735//structural constituent of ribosome;
908_1	2.12005	NA	13110.3	LVYLYTK	1	1	1	0.0619	10817	1.14364e+06	142955	XP_022314578.1/3.59194e-68/60S ribosomal protein L34-like [Crassostrea virginica] &gt;XP_022314580.1 60S ribosomal protein L34-like [Crassostrea virginica] &gt;XP_022316046.1 60S ribosomal protein L34-like [Crassostrea virginica] &gt;XP_022316047.1 60S ribosomal protein L34-like [Crassostrea virginica]	P45842/7e-49/RL34_AEDAL 60S ribosomal protein L34 OS=Aedes albopictus OX=7160 GN=RpL34 PE=2 SV=2	myi:110446548/6e-69/60S ribosomal protein L34-like; K02915 large subunit ribosomal protein L34e	Hs16117787/2e-48/[J] KOG1790 60s ribosomal protein L34	A0A210QX85/7e-68/A0A210QX85_MIZYE 60S ribosomal protein L34 OS=Mizuhopecten yessoensis OX=6573 GN=KP79_PYT05369 PE=3 SV=1	PF01199/9.1E-43/Ribosomal protein L34e	1|IPR008195; Ribosomal protein L34Ae	biological_process:GO:0006412//translation;cellular_component:GO:0005622//intracellular;GO:0005840//ribosome;molecular_function:GO:0003735//structural constituent of ribosome;biological_process:GO:0006412//translation;cellular_component:GO:0005840//ribosome;molecular_function:GO:0003735//structural constituent of ribosome;
96_3	14.0617	NA	16272.1	FEDENFNLK;HVVFGQVVEGMEVVK;IEGFGSQSGK;TTWLDGK;VIPGFMCQGGDFTNHNGTGGK	1;1;1;0;1	4	5	0.4161	17190;27167;13235;9083;30424;30425	770587	70053.4	AGN29582.1/2.33211e-91/peptidyl-prolyl cis-trans isomerase-like protein [Acartia pacifica]	P25007/3e-86/PPIA_DROME Peptidyl-prolyl cis-trans isomerase OS=Drosophila melanogaster OX=7227 GN=Cyp1 PE=1 SV=2	nvl:108561794/3e-88/peptidyl-prolyl cis-trans isomerase-like; K09565 peptidyl-prolyl isomerase F (cyclophilin D) [EC:5.2.1.8]	7293206/3e-86/[O] KOG0865 Cyclophilin type peptidyl-prolyl cis-trans isomerase	R9THY7/4e-91/R9THY7_ACAPC Peptidyl-prolyl cis-trans isomerase OS=Acartia pacifica OX=335913 PE=2 SV=1	PTHR11071/1.5E-85/--	3|IPR002130; Cyclophilin-type peptidyl-prolyl cis-trans isomerase domain|IPR020892; Cyclophilin-type peptidyl-prolyl cis-trans isomerase, conserved site|IPR024936; Cyclophilin-type peptidyl-prolyl cis-trans isomerase	biological_process:GO:0000413//protein peptidyl-prolyl isomerization;GO:0006457//protein folding;molecular_function:GO:0003755//peptidyl-prolyl cis-trans isomerase activity;
507_1	18.0799	NA	27165.1	DDATTIDK;FVECSALTQK;QKPITTEQGEK;TCLLISYTTNK;TPFLLVGTQLDLR	1;1;1;1;1	5	5	0.2199	10349;17912;19524;21373;24914	4.29907e+06	330698	PBC25182.1/4.137e-133/hypothetical protein APICC_01946 [Apis cerana cerana]	Q29HY3/3e-131/CDC42_DROPS Cdc42 homolog OS=Drosophila pseudoobscura pseudoobscura OX=46245 GN=Cdc42 PE=3 SV=1	obi:106879373/7e-133/cdc42 homolog; K04393 cell division control protein 42	7293635/2e-131/[R] KOG0393 Ras-related small GTPase, Rho type	A0A2A3E1I2/8e-133/A0A2A3E1I2_APICC Uncharacterized protein OS=Apis cerana cerana OX=94128 GN=APICC_01946 PE=4 SV=1	SM00173/1.8E-18/--	2|IPR001806; Small GTPase superfamily|IPR003578; Small GTPase superfamily, Rho type	biological_process:GO:0007264//small GTPase mediated signal transduction;cellular_component:GO:0005622//intracellular;molecular_function:GO:0003924//GTPase activity;GO:0005525//GTP binding;biological_process:GO:0007264//small GTPase mediated signal transduction;cellular_component:GO:0016020//membrane;GO:0005622//intracellular;molecular_function:GO:0005525//GTP binding;GO:0003924//GTPase activity;
400_1	6.69095	NA	14140.5	TVFDEGIR;YLECSALSQK	1;1	2	2	0.1463	11628;18351	1.653e+06	206625	KPI93090.1/6.14211e-56/Ras-related C3 botulinum toxin substrate 1 [Papilio xuthus]	Q6RUV5/1e-54/RAC1_RAT Ras-related C3 botulinum toxin substrate 1 OS=Rattus norvegicus OX=10116 GN=Rac1 PE=1 SV=1	pmac:106717492/3e-56/ras-related C3 botulinum toxin substrate 2; K04392 Ras-related C3 botulinum toxin substrate 1	Hs9845511/6e-55/[R] KOG0393 Ras-related small GTPase, Rho type	A0A194PPN2/1e-55/A0A194PPN2_PAPXU Ras-related C3 botulinum toxin substrate 1 OS=Papilio xuthus OX=66420 GN=RR46_14311 PE=4 SV=1	PTHR24072:SF169/6.1E-53/--	1|IPR001806; Small GTPase superfamily	molecular_function:GO:0003924//GTPase activity;GO:0005525//GTP binding;
474_1	2.59745	NA	53255.1	DLVGELADAIR	1	1	1	0.0239	17635	0	0	XP_022315328.1/0/alpha-L-fucosidase-like [Crassostrea virginica]	C3YWU0/0.0/FUCO_BRAFL Alpha-L-fucosidase OS=Branchiostoma floridae OX=7739 GN=BRAFLDRAFT_56888 PE=3 SV=2	crg:105322568/0.0/alpha-L-fucosidase; K01206 alpha-L-fucosidase [EC:3.2.1.51]	Hs14042931/0.0/[G] KOG3340 Alpha-L-fucosidase	K1QC26/0.0/K1QC26_CRAGI Plasma alpha-L-fucosidase OS=Crassostrea gigas OX=29159 GN=CGI_10025772 PE=3 SV=1	PF01120/4.3E-117/Alpha-L-fucosidase	4|IPR000933; Glycoside hydrolase, family 29|IPR016286; Alpha-L-fucosidase, metazoa-type|IPR018526; Glycoside hydrolase, family 29, conserved site|IPR031919; Alpha-L-fucosidase, C-terminal	biological_process:GO:0005975//carbohydrate metabolic process;GO:0006004//fucose metabolic process;molecular_function:GO:0004560//alpha-L-fucosidase activity;biological_process:GO:0006004//fucose metabolic process;molecular_function:GO:0004560//alpha-L-fucosidase activity;
355_1	19.9183	NA	56450.5	EHTLYSVDCHR;EYAAELAEYLR;GPLSEEFIGVLDNR;LAVICNSAPR;TVAATNDSGVAR	1;1;1;1;1	5	7	0.1107	23862;23861;21698;26147;26143;15706;17349	651704	21723.5	XP_022318597.1/3.82356e-57/cytochrome b-c1 complex subunit 2, mitochondrial-like [Crassostrea virginica]	P22695/9e-28/QCR2_HUMAN Cytochrome b-c1 complex subunit 2, mitochondrial OS=Homo sapiens OX=9606 GN=UQCRC2 PE=1 SV=3	crg:105332665/1e-53/cytochrome b-c1 complex subunit 2, mitochondrial; K00415 ubiquinol-cytochrome c reductase core subunit 2	Hs4507843/2e-28/[C] KOG2583 Ubiquinol cytochrome c reductase, subunit QCR2	G1NZX7/2e-51/G1NZX7_MYOLU Uncharacterized protein OS=Myotis lucifugus OX=59463 PE=3 SV=1	PF05193/7.3E-13/Peptidase M16 inactive domain	2|IPR007863; Peptidase M16, C-terminal|IPR011765; Peptidase M16, N-terminal	molecular_function:GO:0046872//metal ion binding;GO:0003824//catalytic activity;
959_1	2.96913	NA	62737.1	QDQIAIAR	1	1	1	0.0142	11154	219115	6639.83	XP_011443921.1/0/PREDICTED: eukaryotic peptide chain release factor GTP-binding subunit ERF3A isoform X2 [Crassostrea gigas]	Q8R050/0.0/ERF3A_MOUSE Eukaryotic peptide chain release factor GTP-binding subunit ERF3A OS=Mus musculus OX=10090 GN=Gspt1 PE=1 SV=2	crg:105339845/0.0/eukaryotic peptide chain release factor GTP-binding subunit ERF3A isoform X1; K03267 peptide chain release factor subunit 3	Hs8922424/0.0/[J] KOG0459 Polypeptide release factor 3	K1RCY7/0.0/K1RCY7_CRAGI Eukaryotic peptide chain release factor GTP-binding subunit ERF3B OS=Crassostrea gigas OX=29159 GN=CGI_10011160 PE=4 SV=1	PTHR23115:SF221/4.1E-267/--	3|IPR000795; Transcription factor, GTP-binding domain|IPR004160; Translation elongation factor EFTu/EF1A, C-terminal|IPR031157; Tr-type G domain, conserved site	molecular_function:GO:0003924//GTPase activity;GO:0005525//GTP binding;molecular_function:GO:0005525//GTP binding;GO:0003924//GTPase activity;
482_1	11.1966	NA	105820	HLLQYEYDIEK;QIADQNLGR;VSAGLQGTGPDMEK	1;1;1	3	3	0.0352	24525;13383;23293	298169	6481.93	XP_011442918.1/0/PREDICTED: rho GTPase-activating protein 17 isoform X1 [Crassostrea gigas]	F1LQX4/3e-144/RHG44_RAT Rho GTPase-activating protein 44 OS=Rattus norvegicus OX=10116 GN=Arhgap44 PE=1 SV=2	crg:105339183/0.0/rho GTPase-activating protein 17 isoform X1; K20638 Rho GTPase-activating protein 17	Hs7662242/2e-144/[T] KOG4270 GTPase-activator protein	K1RNK8/0.0/K1RNK8_CRAGI Rho GTPase-activating protein 17 OS=Crassostrea gigas OX=29159 GN=CGI_10027308 PE=4 SV=1	PTHR14130/8.4E-175/--	2|IPR000198; Rho GTPase-activating protein domain|IPR004148; BAR domain	biological_process:GO:0007165//signal transduction;cellular_component:GO:0005737//cytoplasm;molecular_function:GO:0005515//protein binding;
95_3	2.7719	NA	20838.1	IEFFDFYK;NEPVHFWIGGNR;TQPNQDTSLCIVLWHPFK;YDWADEPCTSSYGYICK	0;0;1;0	1	2	0.3161	15932;24048;24047;30387;30386;30023	0	0	AJW76276.1/1.81463e-102/C-type lectin-1 [Pinctada martensii]	P86854/7e-16/PLCL_MYTGA Perlucin-like protein OS=Mytilus galloprovincialis OX=29158 PE=1 SV=1	crg:105334952/1e-16/perlucin; K06468 low affinity immunoglobulin epsilon Fc receptor	Hs4501991/2e-10/[RW] LSE0104 H Chondroitin sulfate proteoglycan	A0A0D5CBX6/3e-102/A0A0D5CBX6_PINIB C-type lectin-1 OS=Pinctada imbricata OX=66713 PE=2 SV=1	PF00059/5.6E-14/Lectin C-type domain	2|IPR001304; C-type lectin-like|IPR018378; C-type lectin, conserved site	NA
95_4	4.33022	NA	17162.4	IEFFDFYK;LQPNQDTSLCIVLWHPFK;NEPVHFWIGGNR;YDWADEPCTSSYGYICK	0;1;0;0	1	3	0.3846	15932;30439;30440;30448;24048;24047;30023	0	0	AJW76276.1/1.49044e-90/C-type lectin-1 [Pinctada martensii]	P86854/6e-16/PLCL_MYTGA Perlucin-like protein OS=Mytilus galloprovincialis OX=29158 PE=1 SV=1	crg:105322372/8e-17/perlucin-like protein; K17513 C-type lectin superfamily 17 member A	Hs4501991/7e-11/[RW] LSE0104 H Chondroitin sulfate proteoglycan	A0A0D5CBX6/3e-90/A0A0D5CBX6_PINIB C-type lectin-1 OS=Pinctada imbricata OX=66713 PE=2 SV=1	PS00615/-/C-type lectin domain signature.	2|IPR001304; C-type lectin-like|IPR018378; C-type lectin, conserved site	NA
95_2	4.33022	NA	21723	IEFFDFYK;NEPVHFWIGGNR;TQPNQNTSLCIVLWHPFK	0;0;1	1	2	0.2054	15932;24048;24047;30382;30383	0	0	AND99567.1/1.67827e-88/extrapallial fluid protein EP18 [Pinctada fucata]	P86854/6e-15/PLCL_MYTGA Perlucin-like protein OS=Mytilus galloprovincialis OX=29158 PE=1 SV=1	crg:105322372/3e-14/perlucin-like protein; K17513 C-type lectin superfamily 17 member A	Hs22057919/5e-10/[TV] KOG4297 C-type lectin	A0A1C8JY05/3e-88/A0A1C8JY05_PINFU Extrapallial fluid protein EP18 OS=Pinctada fucata OX=50426 PE=2 SV=1	PF00059/1.1E-8/Lectin C-type domain	1|IPR001304; C-type lectin-like	NA
302_1	8.66045	NA	52860.9	NNAATDYDPVDK;TIFAEHLSEDCR	1;1	2	2	0.0519	21580;24996	164063	8203.14	XP_011434925.1/0/PREDICTED: 60S ribosomal protein L3 [Crassostrea gigas]	P27659/0.0/RL3_MOUSE 60S ribosomal protein L3 OS=Mus musculus OX=10090 GN=Rpl3 PE=1 SV=3	crg:105333577/0.0/60S ribosomal protein L3; K02925 large subunit ribosomal protein L3e	Hs4506649/0.0/[J] KOG0746 60S ribosomal protein L3 and related proteins	K1Q1F4/0.0/K1Q1F4_CRAGI 60S ribosomal protein L3 (Fragment) OS=Crassostrea gigas OX=29159 GN=CGI_10010529 PE=3 SV=1	PF00297/8.5E-178/Ribosomal protein L3	2|IPR000597; Ribosomal protein L3|IPR019926; Ribosomal protein L3, conserved site	biological_process:GO:0006412//translation;cellular_component:GO:0005622//intracellular;GO:0005840//ribosome;molecular_function:GO:0003735//structural constituent of ribosome;
522_1	2.13076	NA	102001	VAECFSNR	1	1	1	0.0087	12618	49656.7	1342.07	XP_021356844.1/0/sodium-coupled neutral amino acid transporter 9-like [Mizuhopecten yessoensis] &gt;OWF48889.1 amino acid permease F13H10.3 [Mizuhopecten yessoensis]	Q19425/9e-124/S38A9_CAEEL Sodium-coupled neutral amino acid transporter 9 homolog OS=Caenorhabditis elegans OX=6239 GN=F13H10.3 PE=3 SV=2	myi:110452557/0.0/sodium-coupled neutral amino acid transporter 9-like; K14995 solute carrier family 38 (sodium-coupled neutral amino acid transporter), member 9	CE27959/4e-124/[E] KOG1305 Amino acid transporter protein	A0A210QJK1/0.0/A0A210QJK1_MIZYE Amino acid permease F13H10.3 OS=Mizuhopecten yessoensis OX=6573 GN=KP79_PYT08724 PE=4 SV=1	PR00633/3.6E-65/Chromosome condensation regulator RCC1 signature	2|IPR000408; Regulator of chromosome condensation, RCC1|IPR013057; Amino acid transporter, transmembrane domain	cellular_component:GO:0016021//integral component of membrane;
361_1	4.33022	NA	22631.7	LVQAFQFTDK	1	1	1	0.0495	18303	0	0	AKV63195.1/2.98966e-133/peroxiredoxin [Pinctada fucata]	Q9NL98/7e-97/PRDX_ASCSU Peroxiredoxin OS=Ascaris suum OX=6253 PE=2 SV=1	pret:103464517/3e-100/prdx2; peroxiredoxin-2; K03386 peroxiredoxin (alkyl hydroperoxide reductase subunit C) [EC:1.11.1.15]	CE02609_2/2e-97/[O] KOG0852 Alkyl hydroperoxide reductase, thiol specific antioxidant and related enzymes	A0A0K1RMV1/5e-133/A0A0K1RMV1_PINFU Peroxiredoxin OS=Pinctada fucata OX=50426 PE=4 SV=1	PF00578/9.7E-29/AhpC/TSA family	3|IPR000866; Alkyl hydroperoxide reductase subunit C/ Thiol specific antioxidant|IPR013766; Thioredoxin domain|IPR019479; Peroxiredoxin, C-terminal	biological_process:GO:0045454//cell redox homeostasis;GO:0055114//oxidation-reduction process;molecular_function:GO:0016209//antioxidant activity;GO:0016491//oxidoreductase activity;GO:0051920//peroxiredoxin activity;
473_1	6.76851	NA	21335.9	LLPADSGGNSKPEK;SSSGQGDNPTLTR	1;1	2	2	0.1378	23792;21511	41060.1	3421.68	XP_022312974.1/1.14963e-63/transcription elongation factor A protein 1-like [Crassostrea virginica]	P23193/4e-33/TCEA1_HUMAN Transcription elongation factor A protein 1 OS=Homo sapiens OX=9606 GN=TCEA1 PE=1 SV=2	crg:105318390/1e-59/transcription elongation factor A protein 1; K03145 transcription elongation factor S-II	Hs5803191/2e-33/[K] KOG1105 Transcription elongation factor TFIIS/Cofactor of enhancer-binding protein Sp1	K1PZR9/2e-53/K1PZR9_CRAGI Transcription elongation factor A protein 1 OS=Crassostrea gigas OX=29159 GN=CGI_10019931 PE=4 SV=1	PTHR11477/3.0E-39/--	2|IPR003617; Transcription elongation factor, TFIIS/CRSP70, N-terminal, sub-type|IPR017923; Transcription factor IIS, N-terminal	cellular_component:GO:0005634//nucleus;
579_1	37.2392	NA	19533.3	ATSNVFAMFDQAQIQEFK;DGFIDKEDLHDMLASLGK;EAFNMIDQNR;EDLHDMLASLGK;ELLMTMGDR;FTEDEIDEMFR;GMFDYVEFTR;LNGTDPEDVIK;NAFACFDEDMSGTISEDR	1;1;1;1;1;1;1;1;1	9	29	0.6213	29905;29837;29449;29453;29452;29450;29570;29569;29451;29448;19413;19843;19844;21721;21722;15093;15092;24162;24467;24161;24466;20108;20110;20109;18416;18444;18443;18442;29855	1.71189e+07	1.71189e+06	XP_011413987.1/5.97366e-113/PREDICTED: myosin regulatory light polypeptide 9 [Crassostrea gigas] &gt;XP_011413988.1 PREDICTED: myosin regulatory light polypeptide 9 [Crassostrea gigas] &gt;EKC30147.1 Myosin regulatory light chain sqh [Crassostrea gigas]	P40423/2e-100/SQH_DROME Myosin regulatory light chain sqh OS=Drosophila melanogaster OX=7227 GN=sqh PE=1 SV=1	crg:105318502/9e-114/myosin regulatory light polypeptide 9; K12757 myosin regulatory light chain 12	7290684/8e-101/[Z] KOG0031 Myosin regulatory light chain, EF-Hand protein superfamily	K1Q122/1e-112/K1Q122_CRAGI Myosin regulatory light chain sqh OS=Crassostrea gigas OX=29159 GN=CGI_10021971 PE=4 SV=1	SM00054/1.2/--	2|IPR002048; EF-hand domain|IPR018247; EF-Hand 1, calcium-binding site	molecular_function:GO:0005509//calcium ion binding;molecular_function:GO:0005509//calcium ion binding;
539_1	6.88631	NA	56519.1	GIEFPMTDLDNLAPIHTPAR;QDFLGELVK	1;1	2	2	0.0564	30503;14169	0	0	XP_011452590.1/0/PREDICTED: target of Myb protein 1 isoform X3 [Crassostrea gigas]	Q5SRX1/1e-139/TM1L2_MOUSE TOM1-like protein 2 OS=Mus musculus OX=10090 GN=Tom1l2 PE=1 SV=1	epa:110251865/1e-38/class E vacuolar protein-sorting machinery protein HSE1-like; K16677 dachs	Hs4885637/1e-131/[U] KOG1087 Cytosolic sorting protein GGA2/TOM1	K1QFK8/0.0/K1QFK8_CRAGI Target of Myb protein 1 OS=Crassostrea gigas OX=29159 GN=CGI_10006213 PE=4 SV=1	SM00288/5.0E-58/--	3|IPR002014; VHS domain|IPR004152; GAT domain|IPR027429; Target of Myb1-like 2	biological_process:GO:0006886//intracellular protein transport;cellular_component:GO:0005622//intracellular;
344_1	5.02957	NA	23054	DLMADDPER;TSVGPIIK	1;1	2	2	0.0833	14528;8977	88931.9	6352.28	XP_011414842.1/2.63285e-113/PREDICTED: 5-demethoxyubiquinone hydroxylase, mitochondrial [Crassostrea gigas] &gt;EKC33549.1 Ubiquinone biosynthesis protein COQ7-like protein [Crassostrea gigas]	P97478/3e-82/COQ7_MOUSE 5-demethoxyubiquinone hydroxylase, mitochondrial OS=Mus musculus OX=10090 GN=Coq7 PE=1 SV=3	crg:105319133/4e-114/5-demethoxyubiquinone hydroxylase, mitochondrial; K06134 3-demethoxyubiquinol 3-hydroxylase [EC:1.14.99.60]	Hs7706391/2e-81/[R] KOG4061 DMQ mono-oxygenase/Ubiquinone biosynthesis protein COQ7/CLK-1/CAT5	K1QQZ7/5e-113/K1QQZ7_CRAGI 5-demethoxyubiquinone hydroxylase, mitochondrial OS=Crassostrea gigas OX=29159 GN=CGI_10008420 PE=3 SV=1	PTHR11237:SF4/1.1E-92/--	1|IPR011566; Ubiquinone biosynthesis protein Coq7	biological_process:GO:0006744//ubiquinone biosynthetic process;GO:0055114//oxidation-reduction process;biological_process:GO:0006744//ubiquinone biosynthetic process;cellular_component:GO:0031314//extrinsic component of mitochondrial inner membrane;molecular_function:GO:0016709//oxidoreductase activity, acting on paired donors, with incorporation or reduction of molecular oxygen, NAD(P)H as one d…
244_1	15.5268	NA	28882.8	ELPDVWQHDMYDGGPTPTK;LDLSLDDIIK;SLGTAEVIFER;TAEELDAELDAYK	1;1;1;1	4	5	0.192	30389;30390;16934;18959;24800	1.3918e+06	92786.5	XP_011419631.1/5.28928e-75/PREDICTED: THO complex subunit 4 [Crassostrea gigas]	Q58EA2/8e-57/THO4A_XENLA THO complex subunit 4-A OS=Xenopus laevis OX=8355 GN=alyref-a PE=2 SV=1	crg:105322560/8e-76/THO complex subunit 4; K12881 THO complex subunit 4	Hs17572810/3e-55/[A] KOG0533 RRM motif-containing protein	K1QKQ8/1e-74/K1QKQ8_CRAGI THO complex subunit 4-A OS=Crassostrea gigas OX=29159 GN=CGI_10025768 PE=4 SV=1	SM00360/6.7E-20/--	2|IPR000504; RNA recognition motif domain|IPR025715; Chromatin target of PRMT1 protein, C-terminal	molecular_function:GO:0003676//nucleic acid binding;molecular_function:GO:0003723//RNA binding;
608_1	6.76234	NA	123422	DGLAFCAIIHR;QSLGPNDGTPNK	1;1	2	2	0.0209	20320;19133	342948	4233.92	XP_019922901.1/1.54307e-98/PREDICTED: EH domain-binding protein 1 isoform X3 [Crassostrea gigas]	Q3TN34/3e-60/MILK2_MOUSE MICAL-like protein 2 OS=Mus musculus OX=10090 GN=Micall2 PE=1 SV=1	crg:105328522/5e-98/MICAL-like protein 1 isoform X1; K19948 MICAL-like protein 1	Hs20561140/1e-32/[TZ] KOG1700 Regulatory protein MLP and related LIM proteins	K1RBC0/4e-97/K1RBC0_CRAGI MICAL-like protein 2 OS=Crassostrea gigas OX=29159 GN=CGI_10028683 PE=4 SV=1	PS50021/23.657/Calponin homology (CH) domain profile.	3|IPR001715; Calponin homology domain|IPR022735; bMERB domain|IPR028563; MICAL-like protein	biological_process:GO:0032456//endocytic recycling;molecular_function:GO:0005515//protein binding;GO:0017137//Rab GTPase binding;
903_1	3.28883	NA	95145.3	TESLHDLLQSSR	1	1	1	0.0142	23218	246629	5872.12	XP_022314844.1/0/protein FAM91A1-like [Crassostrea virginica]	Q6TEP1/0.0/F91A1_DANRE Protein FAM91A1 OS=Danio rerio OX=7955 GN=fam91a1 PE=2 SV=2	NA	CE17765/0.0/[S] KOG3707 Uncharacterized conserved protein	K1Q0I3/0.0/K1Q0I3_CRAGI Protein FAM91A1 OS=Crassostrea gigas OX=29159 GN=CGI_10025418 PE=4 SV=1	PTHR28441/0.0/--	4|IPR019824; Leghaemoglobin, iron-binding site|IPR028091; FAM91, N-terminal domain|IPR028097; FAM91, C-terminal domain|IPR039199; FAM91	molecular_function:GO:0019825//oxygen binding;GO:0020037//heme binding;
315_1	14.5987	NA	20334.3	CAIDQWLEYR;DTQTVLHDLNAYLTDK;NLIYTGSSH;WFQNVQHR	1;1;1;1	4	6	0.2416	22424;22425;28491;28490;12828;16099	1.64427e+06	102767	XP_011436012.2/3.53747e-55/PREDICTED: eukaryotic translation elongation factor 1 epsilon-1 [Crassostrea gigas]	Q9D1M4/7e-42/MCA3_MOUSE Eukaryotic translation elongation factor 1 epsilon-1 OS=Mus musculus OX=10090 GN=Eef1e1 PE=1 SV=1	crg:105334318/5e-56/eukaryotic translation elongation factor 1 epsilon-1; K15439 eukaryotic translation elongation factor 1 epsilon-1	Hs4758862/1e-41/[O] KOG0867 Glutathione S-transferase	A0A210PNK1/2e-47/A0A210PNK1_MIZYE Eukaryotic translation elongation factor 1 epsilon-1 OS=Mizuhopecten yessoensis OX=6573 GN=KP79_PYT09104 PE=4 SV=1	PF00043/1.4E-8/Glutathione S-transferase, C-terminal domain	2|IPR004046; Glutathione S-transferase, C-terminal|IPR010987; Glutathione S-transferase, C-terminal-like	NA
391_1	13.2376	NA	22002.8	EFICALSVTSR;LKPEVLEDLR;LSLDEFVEGAK;MPEDESTPEK	1;1;1;1	4	5	0.2199	20580;18717;18716;18618;17377	703459	50247.1	XP_013072671.1/1.58012e-132/PREDICTED: neurocalcin [Biomphalaria glabrata] &gt;XP_013072672.1 PREDICTED: neurocalcin [Biomphalaria glabrata]	Q16982/3e-132/NECX_APLCA Neurocalcin OS=Aplysia californica OX=6500 PE=2 SV=2	lcm:102359888/2e-123/NCALD; neurocalcin delta; K19695 neurocalcin delta	7293713/1e-128/[T] KOG0044 Ca2+ sensor (EF-Hand superfamily)	A0A0B7ALE1/3e-132/A0A0B7ALE1_9EUPU Uncharacterized protein OS=Arion vulgaris OX=1028688 GN=ORF125770 PE=4 SV=1	PF13499/1.3E-16/EF-hand domain pair	2|IPR002048; EF-hand domain|IPR018247; EF-Hand 1, calcium-binding site	molecular_function:GO:0005509//calcium ion binding;molecular_function:GO:0005509//calcium ion binding;
675_1	13.205	NA	25059.8	HEVPPHVFAITDTAYR;LPIYTDK;VEDMAELTCLNEASVLHNLK;VIQYLAYVAASSR	1;1;1;1	4	5	0.2534	28526;9746;30901;30900;24358	2.42829e+06	186792	BAB00612.1/7.24868e-127/myosin, partial [Mizuhopecten yessoensis]	P35579/1e-108/MYH9_HUMAN Myosin-9 OS=Homo sapiens OX=9606 GN=MYH9 PE=1 SV=4	myi:110448588/2e-122/myosin heavy chain, non-muscle-like isoform X1; K10352 myosin heavy chain	Hs13124877/3e-110/[Z] KOG0161 Myosin class II heavy chain	Q9NDL1/1e-126/Q9NDL1_MIZYE Myosin (Fragment) OS=Mizuhopecten yessoensis OX=6573 GN=myosin PE=2 SV=1	PR00193/6.8E-37/Myosin heavy chain signature	1|IPR001609; Myosin head, motor domain	cellular_component:GO:0016459//myosin complex;molecular_function:GO:0003774//motor activity;GO:0005524//ATP binding;
104_1	5.93826	NA	40437.1	ALSEADFAK;VRPEIAAINPGIK	1;1	2	3	0.063	11988;23034;23033	39637.1	1723.35	XP_001842041.1/4.53334e-23/transcription factor A, mitochondrial [Culex quinquefasciatus] &gt;EDS37579.1 transcription factor A, mitochondrial [Culex quinquefasciatus]	Q5B995/1e-10/NHP6_EMENI Non-histone chromosomal protein 6 OS=Emericella nidulans (strain FGSC A4 / ATCC 38163 / CBS 112.46 / NRRL 194 / M139) OX=227321 GN=nhp6 PE=3 SV=1	cqu:CpipJ_CPIJ000371/7e-24/transcription factor A, mitochondrial; K11830 transcription factor A, mitochondrial	7300630/1e-16/[R] KOG0381 HMG box-containing protein	B0W007/8e-23/B0W007_CULQU Transcription factor A, mitochondrial OS=Culex quinquefasciatus OX=7176 GN=6031207 PE=4 SV=1	PS50118/9.232/HMG boxes A and B DNA-binding domains profile.	1|IPR009071; High mobility group box domain	cellular_component:GO:0005634//nucleus;molecular_function:GO:0003677//DNA binding;
72_2	8.88546	NA	28032.3	FHTITTSYYR;LQIWDTAGQER;NIDEHANEDVEK;TFENISK	1;0;1;1	3	4	0.1619	20751;21447;23779;23778;9420	1.00555e+06	52923.8	XP_011454869.1/1.43656e-112/PREDICTED: ras-related protein Rab-10 [Crassostrea gigas]	P22127/2e-99/RAB10_DIPOM Ras-related protein Rab-10 OS=Diplobatis ommata OX=1870830 PE=2 SV=1	crg:105347459/2e-113/ras-related protein Rab-10; K07903 Ras-related protein Rab-10	7295615/6e-100/[TU] KOG0078 GTP-binding protein SEC4, small G protein superfamily, and related Ras family GTP-binding proteins	A0A2T7NR45/2e-112/A0A2T7NR45_POMCA Uncharacterized protein OS=Pomacea canaliculata OX=400727 GN=C0Q70_16895 PE=4 SV=1	SM00175/5.5E-98/--	1|IPR001806; Small GTPase superfamily	molecular_function:GO:0003924//GTPase activity;GO:0005525//GTP binding;molecular_function:GO:0005525//GTP binding;GO:0003924//GTPase activity;
818_1	7.29935	NA	51120.1	HLVFPLLEFLSVK;TLQAETELITK	1;1	2	2	0.0547	26092;19656	88029.3	2934.31	XP_022313018.1/0/eukaryotic translation initiation factor 3 subunit E-like [Crassostrea virginica] &gt;XP_022313224.1 eukaryotic translation initiation factor 3 subunit E-like [Crassostrea virginica]	Q641X8/0.0/EIF3E_RAT Eukaryotic translation initiation factor 3 subunit E OS=Rattus norvegicus OX=10116 GN=Eif3e PE=2 SV=1	crg:105347464/0.0/eukaryotic translation initiation factor 3 subunit E; K03250 translation initiation factor 3 subunit E	Hs4503521/0.0/[J] KOG2758 Translation initiation factor 3, subunit e (eIF-3e)	A0A194ANG7/0.0/A0A194ANG7_PINFU Eukaryotic translation initiation factor 3 subunit E OS=Pinctada fucata OX=50426 PE=3 SV=1	SM01186/5.3E-75/--	3|IPR000717; Proteasome component (PCI) domain|IPR016650; Eukaryotic translation initiation factor 3 subunit E|IPR019010; Eukaryotic translation initiation factor 3 subunit E, N-terminal	cellular_component:GO:0005737//cytoplasm;GO:0005852//eukaryotic translation initiation factor 3 complex;molecular_function:GO:0003743//translation initiation factor activity;biological_process:GO:0006446//regulation of translational initiation;GO:0001731//formation of translation preinitiation complex;cellular_component:GO:0016282//eukaryotic 43S preinitiation complex;GO:0033290//eukaryotic 48S p…
39_1	3.03078	NA	104406	SWYNIVDLLVLLFVYAFNILDQTDNTILMDQSQLVVLATFIAAIYSFR	1	1	2	0.0536	34433;34434	0	0	XP_021340597.1/2.06404e-71/potassium voltage-gated channel protein Shaw-like [Mizuhopecten yessoensis] &gt;OWF36419.1 Potassium voltage-gated channel protein Shaw [Mizuhopecten yessoensis]	Q92953/4e-45/KCNB2_HUMAN Potassium voltage-gated channel subfamily B member 2 OS=Homo sapiens OX=9606 GN=KCNB2 PE=2 SV=2	myi:110441702/3e-72/potassium voltage-gated channel protein Shaw-like; K04887 potassium voltage-gated channel Shaw-related subfamily C member 1	Hs4758622/7e-46/[P] KOG3713 Voltage-gated K+ channel KCNB/KCNC	A0A210PIW1/4e-71/A0A210PIW1_MIZYE Potassium voltage-gated channel protein Shaw OS=Mizuhopecten yessoensis OX=6573 GN=KP79_PYT03199 PE=3 SV=1	PTHR11537/1.2E-143/--	6|IPR000210; BTB/POZ domain|IPR003131; Potassium channel tetramerisation-type BTB domain|IPR003968; Potassium channel, voltage dependent, Kv|IPR003974; Potassium channel, voltage dependent, Kv3|IPR005821; Ion transport domain|IPR028325; Voltage-gated potassium channel	biological_process:GO:0006811//ion transport;GO:0006813//potassium ion transport;GO:0051260//protein homooligomerization;GO:0055085//transmembrane transport;cellular_component:GO:0008076//voltage-gated potassium channel complex;GO:0016020//membrane;molecular_function:GO:0005216//ion channel activity;GO:0005249//voltage-gated potassium channel activity;GO:0005515//protein binding;biological_proces…
526_1	5.56658	NA	22313.3	AIIIFVPVPQLR;HVVFIAQR	1;1	2	2	0.1036	22757;12354	592632	53875.6	AFJ91757.1/1.39042e-133/ribosomal protein S7 [Ostrea edulis]	P62083/2e-118/RS7_RAT 40S ribosomal protein S7 OS=Rattus norvegicus OX=10116 GN=Rps7 PE=1 SV=1	lak:106165617/3e-133/40S ribosomal protein S7; K02993 small subunit ribosomal protein S7e	Hs4506741/7e-119/[J] KOG3320 40S ribosomal protein S7	A0A194AP03/9e-138/A0A194AP03_PINFU 40S ribosomal protein S7 OS=Pinctada fucata OX=50426 PE=3 SV=1	PS00948/-/Ribosomal protein S7e signature.	1|IPR000554; Ribosomal protein S7e	biological_process:GO:0006412//translation;cellular_component:GO:0005622//intracellular;GO:0005840//ribosome;molecular_function:GO:0003735//structural constituent of ribosome;biological_process:GO:0006412//translation;cellular_component:GO:0005840//ribosome;molecular_function:GO:0003735//structural constituent of ribosome;
940_1	8.66045	NA	23071.5	APAEEATIHR;LIDLHSPSEIVK	1;1	2	4	0.1078	15524;15525;22386;22385	3.87693e+06	323077	ACD65148.1/1.4273e-76/putative 40S ribosomal protein RPS20 [Phoronis muelleri]	P60868/3e-71/RS20_RAT 40S ribosomal protein S20 OS=Rattus norvegicus OX=10116 GN=Rps20 PE=3 SV=1	crg:105340582/4e-76/Rps20; 40S ribosomal protein S20; K02969 small subunit ribosomal protein S20e	Hs4506697/1e-71/[J] KOG0900 40S ribosomal protein S20	Q70MN4/5e-75/Q70MN4_CRAGI Ribosomal protein S20 OS=Crassostrea gigas OX=29159 GN=rps20 PE=2 SV=1	PTHR11700:SF8/1.9E-62/--	2|IPR001848; Ribosomal protein S10|IPR027486; Ribosomal protein S10 domain	biological_process:GO:0006412//translation;cellular_component:GO:0005840//ribosome;molecular_function:GO:0003735//structural constituent of ribosome;biological_process:GO:0006412//translation;cellular_component:GO:0015935//small ribosomal subunit;molecular_function:GO:0003723//RNA binding;GO:0003735//structural constituent of ribosome;
15_1	11.7529	NA	24200.6	FFIDPYK;IPHFNAPIFLENK;LLPLQR;VDEIFGSIR	1;1;1;1	4	5	0.1636	11465;26063;26064;7742;13886	791424	65952	XP_019929743.1/4.06759e-45/PREDICTED: H/ACA ribonucleoprotein complex subunit 1 [Crassostrea gigas] &gt;XP_019929744.1 PREDICTED: H/ACA ribonucleoprotein complex subunit 1 [Crassostrea gigas]	Q6AYA1/1e-44/GAR1_RAT H/ACA ribonucleoprotein complex subunit 1 OS=Rattus norvegicus OX=10116 GN=Gar1 PE=2 SV=1	crg:105345478/6e-46/H/ACA ribonucleoprotein complex subunit 1; K11128 H/ACA ribonucleoprotein complex subunit 1	Hs9506713/1e-44/[J] KOG3262 H/ACA small nucleolar RNP component GAR1	A0A315V738/1e-45/A0A315V738_GAMAF H/ACA ribonucleoprotein complex subunit (Fragment) OS=Gambusia affinis OX=33528 GN=CCH79_00005529 PE=3 SV=1	PF04410/1.4E-31/Gar1/Naf1 RNA binding region	2|IPR007504; H/ACA ribonucleoprotein complex, subunit Gar1/Naf1|IPR021154; H/ACA ribonucleoprotein complex, subunit Gar1	biological_process:GO:0001522//pseudouridine synthesis;GO:0042254//ribosome biogenesis;cellular_component:GO:0031429//box H/ACA snoRNP complex;biological_process:GO:0006364//rRNA processing;GO:0001522//pseudouridine synthesis;cellular_component:GO:0031429//box H/ACA snoRNP complex;molecular_function:GO:0003723//RNA binding;
950_1	8.66045	NA	198661	CHIAGSLDHFTR;HLMSGDGGYGK	1;1	2	2	0.0132	23809;16284	14554.4	128.8	EKC32942.1/0/Poly [ADP-ribose] polymerase 14 [Crassostrea gigas]	Q460N5/1e-54/PAR14_HUMAN Protein mono-ADP-ribosyltransferase PARP14 OS=Homo sapiens OX=9606 GN=PARP14 PE=1 SV=3	crg:105347636/0.0/poly [ADP-ribose] polymerase 14; K15261 poly [ADP-ribose] polymerase 10/14/15 [EC:2.4.2.30]	Hs22043739/2e-37/[S] LSE0227 H Uncharacterized protein	K1Q831/0.0/K1Q831_CRAGI Poly [ADP-ribose] polymerase OS=Crassostrea gigas OX=29159 GN=CGI_10024733 PE=4 SV=1	PTHR14453:SF84/3.3E-159/--	4|IPR000504; RNA recognition motif domain|IPR001875; Death effector domain|IPR002589; Macro domain|IPR012317; Poly(ADP-ribose) polymerase, catalytic domain	biological_process:GO:0042981//regulation of apoptotic process;molecular_function:GO:0003676//nucleic acid binding;GO:0003950//NAD+ ADP-ribosyltransferase activity;GO:0005515//protein binding;
351_1	10.1022	NA	22090.4	IGVLDESK;LDYVLGLR;LIGEFGLR;QVVNIPSFVVR	1;1;1;1	4	4	0.1852	9987;11922;10926;19967	1.33967e+06	95690.4	ALS46559.1/1.1669e-122/ribosomal protein S9 [Haliotis diversicolor]	B4PEU8/6e-112/RS9_DROYA 40S ribosomal protein S9 OS=Drosophila yakuba OX=7245 GN=RpS9 PE=2 SV=1	myi:110467360/5e-123/40S ribosomal protein S9; K02997 small subunit ribosomal protein S9e	7294919/3e-112/[J] KOG3301 Ribosomal protein S4	A0A0U2WYM5/2e-122/A0A0U2WYM5_HALDV Ribosomal protein S9 OS=Haliotis diversicolor OX=36095 GN=RPS9 PE=2 SV=1	PS00632/-/Ribosomal protein S4 signature.	4|IPR001912; Ribosomal protein S4/S9, N-terminal|IPR002942; RNA-binding S4 domain|IPR018079; Ribosomal protein S4, conserved site|IPR022801; Ribosomal protein S4/S9	cellular_component:GO:0005622//intracellular;molecular_function:GO:0003723//RNA binding;GO:0019843//rRNA binding;biological_process:GO:0006412//translation;cellular_component:GO:0015935//small ribosomal subunit;molecular_function:GO:0003735//structural constituent of ribosome;GO:0019843//rRNA binding;
737_1	4.33022	NA	197311	VQEVVDILDENVR	1	1	1	0.0076	25867	114173	1119.35	XP_021342924.1/1.00867e-73/uncharacterized protein LOC110443193 isoform X1 [Mizuhopecten yessoensis] &gt;OWF35216.1 Peptidase inhibitor 16 [Mizuhopecten yessoensis]	Q9CQ35/1e-16/GRPL2_MOUSE GLIPR1-like protein 2 OS=Mus musculus OX=10090 GN=Glipr1l2 PE=1 SV=1	myi:110443193/2e-74/uncharacterized protein LOC110443193 isoform X1; K20412 peptidase inhibitor 16	Hs22059237/1e-15/[S] KOG3017 Defense-related protein containing SCP domain	A0A210PFJ1/2e-73/A0A210PFJ1_MIZYE Peptidase inhibitor 16 OS=Mizuhopecten yessoensis OX=6573 GN=KP79_PYT05968 PE=4 SV=1	PR00219/1.6E-7/Synaptobrevin signature	2|IPR001388; Synaptobrevin|IPR014044; CAP domain	biological_process:GO:0016192//vesicle-mediated transport;cellular_component:GO:0016021//integral component of membrane;
775_1	5.82499	NA	24108.5	DVDSNEVLER;WQFDVENDK	1;1	2	2	0.09	17727;17861	74755.6	4672.22	XP_011437568.1/4.55375e-101/PREDICTED: mitotic spindle assembly checkpoint protein MAD2A isoform X1 [Crassostrea gigas]	Q13257/2e-87/MD2L1_HUMAN Mitotic spindle assembly checkpoint protein MAD2A OS=Homo sapiens OX=9606 GN=MAD2L1 PE=1 SV=1	crg:105335419/7e-102/mitotic spindle assembly checkpoint protein MAD2A isoform X1; K02537 mitotic spindle assembly checkpoint protein MAD2	Hs4505067/7e-88/[DZ] KOG3285 Spindle assembly checkpoint protein	K1PWS8/1e-97/K1PWS8_CRAGI Mitotic spindle assembly checkpoint protein MAD2A OS=Crassostrea gigas OX=29159 GN=CGI_10011548 PE=4 SV=1	PTHR11842:SF11/1.6E-77/--	2|IPR003511; HORMA domain|IPR027097; Mitotic spindle checkpoint protein Mad2	biological_process:GO:0007094//mitotic spindle assembly checkpoint;
490_1	15.3296	NA	37607.9	EVAVVDK;GFGFVVFK;IFVGNLSWETTQK;LGSNEVDVK;VDPSVSEDEIK	1;1;1;1;1	5	5	0.1433	8019;10836;25795;12171;18840	1.32357e+06	94540.6	XP_022314814.1/1.14332e-89/heterogeneous nuclear ribonucleoprotein D-like isoform X1 [Crassostrea virginica]	Q640A2/2e-60/HNRDL_XENTR Heterogeneous nuclear ribonucleoprotein D-like OS=Xenopus tropicalis OX=8364 GN=hnrnpdl PE=2 SV=1	myi:110460857/9e-88/heterogeneous nuclear ribonucleoprotein D-like isoform X1; K13044 heterogeneous nuclear ribonucleoprotein A/B/D	Hs14110417/2e-61/[R] KOG0118 FOG: RRM domain	A0A210Q1M9/1e-86/A0A210Q1M9_MIZYE Heterogeneous nuclear ribonucleoprotein D-like OS=Mizuhopecten yessoensis OX=6573 GN=KP79_PYT07948 PE=4 SV=1	PTHR44439/5.1E-83/--	1|IPR000504; RNA recognition motif domain	molecular_function:GO:0003676//nucleic acid binding;
266_1	4.33022	NA	16860	NPDGTLNLLNWECAIPGK	1	1	1	0.1216	29516	0	0	XP_022313176.1/7.71309e-63/SUMO-conjugating enzyme UBC9-B [Crassostrea virginica]	Q28CQ4/1e-60/UBC9_XENTR SUMO-conjugating enzyme UBC9 OS=Xenopus tropicalis OX=8364 GN=ube2i PE=2 SV=1	tut:107365129/3e-62/SUMO-conjugating enzyme UBC9-B; K10577 ubiquitin-conjugating enzyme E2 I	Hs4507785/5e-61/[O] KOG0424 Ubiquitin-protein ligase	A0A4C1XNW7/8e-62/A0A4C1XNW7_9NEOP SUMO-conjugating enzyme UBC9-A OS=Eumeta japonica OX=151549 GN=ube2ia PE=4 SV=1	SM00212/1.3E-7/--	3|IPR000608; Ubiquitin-conjugating enzyme E2|IPR023313; Ubiquitin-conjugating enzyme, active site|IPR027230; SUMO-conjugating enzyme Ubc9	molecular_function:GO:0019789//SUMO transferase activity;molecular_function:GO:0005524//ATP binding;GO:0019789//SUMO transferase activity;
128_1	2.96913	NA	26017.5	AGAASEDEIR	1	1	1	0.0429	13472	126559	8437.27	XP_021348721.1/5.42046e-130/GTP-binding protein SAR1-like isoform X1 [Mizuhopecten yessoensis] &gt;OWF52746.1 GTP-binding protein SAR1b [Mizuhopecten yessoensis]	Q9CQC9/2e-98/SAR1B_MOUSE GTP-binding protein SAR1b OS=Mus musculus OX=10090 GN=Sar1b PE=1 SV=1	myi:110447390/8e-131/GTP-binding protein SAR1-like isoform X1; K07953 GTP-binding protein SAR1 [EC:3.6.5.-]	7300832/1e-107/[U] KOG0077 Vesicle coat complex COPII, GTPase subunit SAR1	A0A2T7PX65/2e-149/A0A2T7PX65_POMCA Uncharacterized protein OS=Pomacea canaliculata OX=400727 GN=C0Q70_00579 PE=3 SV=1	PTHR11711:SF217/2.0E-109/--	2|IPR006687; Small GTPase superfamily, SAR1-type|IPR006689; Small GTPase superfamily, ARF/SAR type	biological_process:GO:0006886//intracellular protein transport;cellular_component:GO:0005622//intracellular;molecular_function:GO:0005525//GTP binding;biological_process:GO:0006886//intracellular protein transport;GO:0016192//vesicle-mediated transport;cellular_component:GO:0005783//endoplasmic reticulum;GO:0005794//Golgi apparatus;molecular_function:GO:0005525//GTP binding;
766_1	7.29935	NA	14247.6	TAAPTTTVATK;TCAQCGYPSPTIR	1;1	2	4	0.1967	14546;14547;25593;25594	1.83235e+06	229044	XP_022317179.1/3.08088e-50/probable 60S ribosomal protein L37-A [Crassostrea virginica]	Q9VXX8/4e-44/RL371_DROME Probable 60S ribosomal protein L37-A OS=Drosophila melanogaster OX=7227 GN=RpL37a PE=1 SV=1	crg:105328963/2e-49/probable 60S ribosomal protein L37-A; K02922 large subunit ribosomal protein L37e	7293042/2e-44/[J] KOG3475 60S ribosomal protein L37	A0A194AKT0/3e-65/A0A194AKT0_PINFU Ribosomal protein L37 OS=Pinctada fucata OX=50426 PE=3 SV=1	PTHR10768:SF11/1.4E-38/--	2|IPR001569; Ribosomal protein L37e|IPR018267; Ribosomal protein L37e, conserved site	biological_process:GO:0006412//translation;cellular_component:GO:0005622//intracellular;GO:0005840//ribosome;molecular_function:GO:0003735//structural constituent of ribosome;biological_process:GO:0006412//translation;cellular_component:GO:0005840//ribosome;molecular_function:GO:0046872//metal ion binding;GO:0003735//structural constituent of ribosome;GO:0019843//rRNA binding;
341_1	10.2685	NA	15093.3	QMIVDVLHPGK;TSGFALVYDSLDFAK;TTPDVIFCFGFK	1;1;1	3	6	0.2901	19390;19831;19830;27001;27000;24165	1.32063e+06	264125	XP_021376364.1/8.18941e-78/40S ribosomal protein S24-like isoform X1 [Mizuhopecten yessoensis]	Q90YQ0/9e-74/RS24_ICTPU 40S ribosomal protein S24 OS=Ictalurus punctatus OX=7998 GN=rps24 PE=2 SV=1	myi:110465103/1e-78/40S ribosomal protein S24-like isoform X1; K02974 small subunit ribosomal protein S24e	7291445/5e-73/[J] KOG3424 40S ribosomal protein S24	A0A4D5R8X4/1e-78/A0A4D5R8X4_SCOVI 40S ribosomal protein S24 OS=Scolopendra viridis OX=118503 PE=4 SV=1	PTHR10496:SF8/1.3E-69/--	2|IPR001976; Ribosomal protein S24e|IPR018098; Ribosomal S24e conserved site	biological_process:GO:0006412//translation;cellular_component:GO:0005622//intracellular;GO:0005840//ribosome;molecular_function:GO:0003735//structural constituent of ribosome;
299_1	9.83551	NA	39301.9	FASATGATPIAGR;IDHQPVTEASYVNIPVIALCNTDSPLR;YVDVAIPCNNK	1;1;1	3	3	0.1417	18919;33220;20835	412707	21721.4	A3RLT6.1/0/RecName: Full=40S ribosomal protein SA &gt;ABO10190.1 67kD laminin receptor precursor [Pinctada fucata]	A3RLT6/0.0/RSSA_PINFU 40S ribosomal protein SA OS=Pinctada fucata OX=50426 PE=2 SV=1	crg:105335782/0.0/40S ribosomal protein SA; K02998 small subunit ribosomal protein SAe	Hs9845502/2e-155/[J] KOG0830 40S ribosomal protein SA (P40)/Laminin receptor 1	K1R4D4/6e-180/K1R4D4_CRAGI 40S ribosomal protein SA OS=Crassostrea gigas OX=29159 GN=CGI_10021852 PE=3 SV=1	PR00395/2.4E-32/Ribosomal protein S2 signature	4|IPR001865; Ribosomal protein S2|IPR005707; Ribosomal protein S2, eukaryotic/archaeal|IPR018130; Ribosomal protein S2, conserved site|IPR032281; 40S ribosomal protein SA, C-terminal domain	biological_process:GO:0006412//translation;cellular_component:GO:0005622//intracellular;GO:0005840//ribosome;GO:0015935//small ribosomal subunit;molecular_function:GO:0003735//structural constituent of ribosome;biological_process:GO:0000028//ribosomal small subunit assembly;GO:0006412//translation;cellular_component:GO:0022627//cytosolic small ribosomal subunit;molecular_function:GO:0003735//stru…
67_1	4.33022	NA	55495.7	FPDSHQLFVGNLPHNVQER	1	1	2	0.038	30660;30659	502476	16749.2	XP_011454471.1/2.16588e-167/PREDICTED: ras GTPase-activating protein-binding protein 2 [Crassostrea gigas] &gt;XP_011454472.1 PREDICTED: ras GTPase-activating protein-binding protein 2 [Crassostrea gigas]	P97379/9e-98/G3BP2_MOUSE Ras GTPase-activating protein-binding protein 2 OS=Mus musculus OX=10090 GN=G3bp2 PE=1 SV=2	cmk:103184137/2e-103/g3bp1; G3BP stress granule assembly factor 1; K17265 Ras GTPase-activating protein-binding protein 1 [EC:3.6.4.12 3.6.4.13]	Hs19923399/3e-97/[T] KOG0116 RasGAP SH3 binding protein rasputin, contains NTF2 and RRM domains	K1QEJ0/7e-167/K1QEJ0_CRAGI Ras GTPase-activating protein-binding protein 2 OS=Crassostrea gigas OX=29159 GN=CGI_10005086 PE=4 SV=1	PF02136/2.0E-29/Nuclear transport factor 2 (NTF2) domain	4|IPR000504; RNA recognition motif domain|IPR002075; Nuclear transport factor 2|IPR018222; Nuclear transport factor 2, eukaryote|IPR034377; Ras GTPase-activating protein-binding protein 2	biological_process:GO:0034063//stress granule assembly;molecular_function:GO:0003676//nucleic acid binding;
505_1	11.5202	NA	61642.1	ENIYAIQTLQDFQYR;FAQNAMGIGSNDK;SLVLLEYITK	1;1;1	3	3	0.0664	28831;22831;17804	290193	20728.1	XP_011454461.1/0/PREDICTED: epsin-2 isoform X3 [Crassostrea gigas]	O95208/7e-130/EPN2_HUMAN Epsin-2 OS=Homo sapiens OX=9606 GN=EPN2 PE=1 SV=3	crg:105347197/0.0/epsin-2 isoform X1; K12471 epsin	Hs7662468/2e-130/[F] KOG2056 Equilibrative nucleoside transporter protein	A0A1S3JDK9/8e-176/A0A1S3JDK9_LINUN epsin-2 isoform X2 OS=Lingula unguis OX=7574 GN=LOC106172371 PE=4 SV=1	SM00273/5.5E-60/--	3|IPR003903; Ubiquitin interacting motif|IPR013809; ENTH domain|IPR027319; Epsin-2, metazoa	biological_process:GO:0006897//endocytosis;cellular_component:GO:0030128//clathrin coat of endocytic vesicle;
628_1	13.7129	NA	22929.2	KPPNFSWIQEGK;MDRPGSLETDDQENR;MGGLTAVHAIEK;VIDFTPPSISQIER	1;1;1;1	4	4	0.2585	24143;28039;19113;26695	3.42449e+06	311317	XP_014768663.1/2.11468e-43/PREDICTED: dual specificity protein phosphatase 23-like isoform X1 [Octopus bimaculoides] &gt;KOF93779.1 hypothetical protein OCBIM_22003551mg [Octopus bimaculoides]	Q9BVJ7/4e-38/DUS23_HUMAN Dual specificity protein phosphatase 23 OS=Homo sapiens OX=9606 GN=DUSP23 PE=1 SV=1	obi:106868066/3e-44/dual specificity protein phosphatase 23-like; K14165 atypical dual specificity phosphatase [EC:3.1.3.16 3.1.3.48]	Hs8923413/1e-37/[V] KOG1720 Protein tyrosine phosphatase CDC14	A0A0L8HX75/4e-43/A0A0L8HX75_OCTBM Uncharacterized protein OS=Octopus bimaculoides OX=37653 GN=OCBIM_22003551mg PE=4 SV=1	PF00782/2.0E-14/Dual specificity phosphatase, catalytic domain	4|IPR000340; Dual specificity phosphatase, catalytic domain|IPR000387; Tyrosine specific protein phosphatases domain|IPR016130; Protein-tyrosine phosphatase, active site|IPR020422; Dual specificity protein phosphatase domain	biological_process:GO:0006470//protein dephosphorylation;GO:0016311//dephosphorylation;molecular_function:GO:0004725//protein tyrosine phosphatase activity;GO:0008138//protein tyrosine/serine/threonine phosphatase activity;GO:0016791//phosphatase activity;molecular_function:GO:0008138//protein tyrosine/serine/threonine phosphatase activity;GO:0004725//protein tyrosine phosphatase activity;
52_2	4.33022	NA	41768.7	AGFAGDDAPR;DSYVGDEAQSK;EITALAPSTMK;GYSFTTTAER;HQGVMVGMGQK;IIAPPER;IWHHTFYNELR;QEYDESGPSIVHR;SYELPDGQVITIGNER;VAPEEHPVLLTEAPLNPK	0;0;1;0;0;0;0;0;0;0	1	1	0.3138	12514;12515;12513;18345;17358;16590;16591;18046;18073;17652;17651;17629;18045;17631;8616;8615;25672;25679;25680;25678;25677;25675;25703;25681;25682;25702;25673;25424;25698;25423;25697;25720;25719;28142;28141;28143;28144;29112;29113	1.70798e+06	74259.9	XP_011444815.1/0/PREDICTED: actin-2 [Crassostrea gigas] &gt;EKC38058.1 Actin-2 [Crassostrea gigas]	P30163/0.0/ACT2_ONCVO Actin-2 OS=Onchocerca volvulus OX=6282 GN=act-2b PE=3 SV=1	crg:105340468/0.0/actin-2; K05692 actin beta/gamma 1	CE13150/0.0/[Z] KOG0676 Actin and related proteins	K1QWP8/0.0/K1QWP8_CRAGI Actin-2 OS=Crassostrea gigas OX=29159 GN=CGI_10022729 PE=3 SV=1	PR00190/4.7E-58/Actin signature	3|IPR004000; Actin family|IPR004001; Actin, conserved site|IPR020902; Actin/actin-like conserved site	molecular_function:GO:0005524//ATP binding;
551_1	4.33022	NA	42412.5	GIVTNWDDMEK	1	1	2	0.0295	21215;21595	1.09069e+06	47421.3	BAE30781.1/0/unnamed protein product [Mus musculus] &gt;BAE30828.1 unnamed protein product [Mus musculus] &gt;BAE30900.1 unnamed protein product [Mus musculus] &gt;BAE30908.1 unnamed protein product [Mus musculus] &gt;BAE30933.1 unnamed protein product [Mus musculus] &gt;BAE31046.1 unnamed protein product [Mus musculus] &gt;BAE31245.1 unnamed protein product [Mus musculus] &gt;BAE31340.1 unnamed …	P84336/0.0/ACTB_CAMDR Actin, cytoplasmic 1 OS=Camelus dromedarius OX=9838 GN=ACTB PE=1 SV=1	biu:109565928/0.0/ACTG2; actin, gamma-enteric smooth muscle; K12315 actin, gamma-enteric smooth muscle	CE13150/0.0/[Z] KOG0676 Actin and related proteins	Q3U939/0.0/Q3U939_MOUSE Uncharacterized protein OS=Mus musculus OX=10090 GN=Actb PE=2 SV=1	PS01132/-/Actins and actin-related proteins signature.	2|IPR004000; Actin family|IPR020902; Actin/actin-like conserved site	molecular_function:GO:0005524//ATP binding;
789_1	11.5202	NA	29859.6	GVCYLILCEK;LSQDPQPPSR;NLSNINTELQDVHR	1;1;1	3	4	0.1308	19882;16348;27122;27121	54640.8	3035.6	XP_021349050.1/4.81671e-121/vesicle-trafficking protein SEC22b-like [Mizuhopecten yessoensis] &gt;OWF52612.1 Vesicle-trafficking protein SEC22b [Mizuhopecten yessoensis]	Q7SXP0/3e-103/S22BB_DANRE Vesicle-trafficking protein SEC22b-B OS=Danio rerio OX=7955 GN=sec22bb PE=2 SV=1	myi:110447585/7e-122/vesicle-trafficking protein SEC22b-like; K08517 vesicle transport protein SEC22	Hs4759086/1e-100/[U] KOG0862 Synaptobrevin/VAMP-like protein SEC22	A0A210QVC8/9e-121/A0A210QVC8_MIZYE Vesicle-trafficking protein SEC22b OS=Mizuhopecten yessoensis OX=6573 GN=KP79_PYT04077 PE=3 SV=1	PS50859/27.066/Longin domain profile.	2|IPR001388; Synaptobrevin|IPR010908; Longin domain	biological_process:GO:0016192//vesicle-mediated transport;cellular_component:GO:0016021//integral component of membrane;biological_process:GO:0016192//vesicle-mediated transport;cellular_component:GO:0016021//integral component of membrane;
372_1	9.09904	NA	31339.1	DALLCMLTDK;GIAVTNTPK;NAMSETASQNILDVLNGK	1;1;1	3	4	0.1289	17815;10840;28850;28916	27722.5	1732.66	XP_011439665.1/6.82282e-152/PREDICTED: glyoxylate reductase/hydroxypyruvate reductase [Crassostrea gigas] &gt;XP_019926441.1 PREDICTED: glyoxylate reductase/hydroxypyruvate reductase [Crassostrea gigas]	Q9UBQ7/4e-101/GRHPR_HUMAN Glyoxylate reductase/hydroxypyruvate reductase OS=Homo sapiens OX=9606 GN=GRHPR PE=1 SV=1	crg:105336882/1e-152/glyoxylate reductase/hydroxypyruvate reductase; K00049 glyoxylate/hydroxypyruvate reductase [EC:1.1.1.79 1.1.1.81]	Hs6912396/2e-101/[C] KOG0069 Glyoxylate/hydroxypyruvate reductase (D-isomer-specific 2-hydroxy acid dehydrogenase superfamily)	K1QGZ7/2e-147/K1QGZ7_CRAGI Glyoxylate reductase/hydroxypyruvate reductase OS=Crassostrea gigas OX=29159 GN=CGI_10014070 PE=3 SV=1	PF00389/1.1E-28/D-isomer specific 2-hydroxyacid dehydrogenase, catalytic domain	3|IPR006139; D-isomer specific 2-hydroxyacid dehydrogenase, catalytic domain|IPR006140; D-isomer specific 2-hydroxyacid dehydrogenase, NAD-binding domain|IPR029752; D-isomer specific 2-hydroxyacid dehydrogenase, NAD-binding domain conserved site 1	biological_process:GO:0008152//metabolic process;GO:0055114//oxidation-reduction process;molecular_function:GO:0016616//oxidoreductase activity, acting on the CH-OH group of donors, NAD or NADP as acceptor;GO:0051287//NAD binding;molecular_function:GO:0016616//oxidoreductase activity, acting on the CH-OH group of donors, NAD or NADP as acceptor;GO:0051287//NAD binding;
544_1	6.69095	NA	27775.6	NAQYVSDIK;SPQLLVINPGK	1;1	2	2	0.0813	13923;17475	629127	41941.8	XP_010221323.1/5.67586e-43/PREDICTED: ribosome-recycling factor, mitochondrial, partial [Tinamus guttatus]	Q0VCQ4/2e-36/RRFM_BOVIN Ribosome-recycling factor, mitochondrial OS=Bos taurus OX=9913 GN=MRRF PE=2 SV=1	aam:106495989/2e-42/MRRF; mitochondrial ribosome recycling factor; K02838 ribosome recycling factor	Hs20270317/3e-35/[J] KOG4759 Ribosome recycling factor	A0A099ZMP4/1e-42/A0A099ZMP4_TINGU Uncharacterized protein (Fragment) OS=Tinamus guttatus OX=94827 GN=N309_03652 PE=4 SV=1	PF01765/6.6E-39/Ribosome recycling factor	2|IPR002661; Ribosome recycling factor|IPR023584; Ribosome recycling factor domain	biological_process:GO:0006412//translation;
272_1	6.86638	NA	206069	QAVDVSPLR;VNQAIWLLCTGAR	1;1	2	2	0.0122	12677;25463	212273	2332.67	XP_022323191.1/0/serine/threonine kinase-like domain-containing protein STKLD1 isoform X1 [Crassostrea virginica]	P46782/4e-118/RS5_HUMAN 40S ribosomal protein S5 OS=Homo sapiens OX=9606 GN=RPS5 PE=1 SV=4	crg:105338873/0.0/serine/threonine kinase-like domain-containing protein STKLD1 isoform X1; K17546 serine/threonine kinase-like domain-containing protein STKLD1	Hs13904870/2e-118/[J] KOG3291 Ribosomal protein S7	A0A210Q1P3/0.0/A0A210Q1P3_MIZYE Inactive protein kinase-like protein OS=Mizuhopecten yessoensis OX=6573 GN=KP79_PYT04843 PE=4 SV=1	PF00177/6.0E-34/Ribosomal protein S7p/S5e	6|IPR000477; Reverse transcriptase domain|IPR000719; Protein kinase domain|IPR008266; Tyrosine-protein kinase, active site|IPR020606; Ribosomal protein S7, conserved site|IPR020635; Tyrosine-protein kinase, catalytic domain|IPR023798; Ribosomal protein S7 domain	biological_process:GO:0006412//translation;GO:0006468//protein phosphorylation;molecular_function:GO:0003723//RNA binding;GO:0003735//structural constituent of ribosome;GO:0004672//protein kinase activity;GO:0004713//protein tyrosine kinase activity;GO:0005524//ATP binding;
639_1	4.33022	NA	32180.3	NAEAIFVGGGNTFR	1	1	1	0.0493	24556	239326	15955.1	XP_011443591.1/1.03841e-119/PREDICTED: alpha-aspartyl dipeptidase [Crassostrea gigas]	Q91642/4e-108/PEPE_XENLA Alpha-aspartyl dipeptidase OS=Xenopus laevis OX=8355 GN=aad-a PE=1 SV=1	crg:105339651/2e-120/alpha-aspartyl dipeptidase; K05995 dipeptidase E [EC:3.4.13.21]	NA	K1PWS2/9e-118/K1PWS2_CRAGI Alpha-aspartyl dipeptidase OS=Crassostrea gigas OX=29159 GN=CGI_10018083 PE=4 SV=1	PF03575/4.7E-62/Peptidase family S51	1|IPR005320; Peptidase S51	biological_process:GO:0006508//proteolysis;molecular_function:GO:0008236//serine-type peptidase activity;molecular_function:GO:0008233//peptidase activity;GO:0008236//serine-type peptidase activity;
788_1	22.8393	NA	66151.4	ADADINLSR;EDFSDLPPNQR;ELHDLAGQHEVIAENIQAQVIK;GIDFSER;GLFNLFGTSK;NSLAQLDK;VDALNAELR	1;1;1;1;1;1;1	7	8	0.1308	12463;21467;31503;31504;9134;15149;10595;13062	5.7116e+06	167988	XP_019921331.1/0/PREDICTED: formin-binding protein 1-like isoform X11 [Crassostrea gigas]	Q96RU3/3e-131/FNBP1_HUMAN Formin-binding protein 1 OS=Homo sapiens OX=9606 GN=FNBP1 PE=1 SV=2	crg:105324940/0.0/formin-binding protein 1-like isoform X2; K20121 formin-binding protein 1	7292484/2e-137/[Z] KOG3565 Cdc42-interacting protein CIP4	A0A210QC99/0.0/A0A210QC99_MIZYE Cdc42-interacting protein 4-like OS=Mizuhopecten yessoensis OX=6573 GN=KP79_PYT04808 PE=4 SV=1	PS51741/41.359/F-BAR domain profile.	3|IPR001060; FCH domain|IPR001452; SH3 domain|IPR031160; F-BAR domain	molecular_function:GO:0005515//protein binding;
40_2	9.11776	NA	35546.3	AMAAEAEATR;GPGLFFLYPCIDEMK;LPIQLQR;NMAELLSDR;SAQLLAATTLR	0;1;0;1;1	3	3	0.1635	13520;28094;10092;14161;16936	714060	35703	XP_022328577.1/1.68332e-148/mechanosensory protein 2-like [Crassostrea virginica]	Q27433/2e-121/MEC2_CAEEL Mechanosensory protein 2 OS=Caenorhabditis elegans OX=6239 GN=mec-2 PE=1 SV=1	crg:105320780/3e-148/band 7 protein AAEL010189; K17286 erythrocyte band 7 integral membrane protein	CE04393/7e-122/[C] KOG2621 Prohibitins and stomatins of the PID superfamily	K1QR58/5e-147/K1QR58_CRAGI Mechanosensory protein 2 OS=Crassostrea gigas OX=29159 GN=CGI_10014244 PE=4 SV=1	PTHR10264/1.0E-140/--	3|IPR001107; Band 7 domain|IPR001972; Stomatin family|IPR018080; Band 7/stomatin-like, conserved site	cellular_component:GO:0016020//membrane;
877_1	23.6276	NA	19177.5	AMDFNNDGR;EGQGAITIEQYVSVMK;GFETMGFEVDDELK;LIVFLGFDGGR;LYSDQFLR;QAAQEILSSVDK;VPINSVFR	1;1;1;1;1;1;1	7	8	0.4643	13955;27893;26854;18218;14003;20758;20290;11522	4.80369e+06	480369	XP_011432579.1/2.22744e-39/PREDICTED: calmodulin isoform X3 [Crassostrea gigas]	Q12798/3e-11/CETN1_HUMAN Centrin-1 OS=Homo sapiens OX=9606 GN=CETN1 PE=1 SV=1	crg:105331896/7e-40/calmodulin isoform X1; K02183 calmodulin	Hs4757974/1e-11/[ZD] KOG0028 Ca2+-binding protein (centrin/caltractin), EF-Hand superfamily protein	K1R8M9/8e-39/K1R8M9_CRAGI Calcium-dependent protein kinase 31 OS=Crassostrea gigas OX=29159 GN=CGI_10015881 PE=4 SV=1	PTHR23064:SF18/3.0E-21/--	2|IPR002048; EF-hand domain|IPR018247; EF-Hand 1, calcium-binding site	molecular_function:GO:0005509//calcium ion binding;molecular_function:GO:0016301//kinase activity;GO:0005509//calcium ion binding;
542_1	11.88	NA	237655	AFGGQSINYGK;HSLSFVDTNSGK;NTILATGGYGR;TGHSLLHTLYGR	1;1;1;1	4	5	0.0216	16810;20832;16312;22467;22464	971636	10016.9	XP_019927012.1/0/PREDICTED: Niemann-Pick C1 protein-like [Crassostrea gigas]	O15118/0.0/NPC1_HUMAN NPC intracellular cholesterol transporter 1 OS=Homo sapiens OX=9606 GN=NPC1 PE=1 SV=2	crg:105338347/0.0/Niemann-Pick C1 protein-like; K12385 Niemann-Pick C1 protein	Hs4557803/0.0/[I] KOG1933 Cholesterol transport protein (Niemann-Pick C disease protein)	A0A210Q408/0.0/A0A210Q408_MIZYE Niemann-Pick C1 protein OS=Mizuhopecten yessoensis OX=6573 GN=KP79_PYT23882 PE=4 SV=1	PF02910/1.4E-33/Fumarate reductase flavoprotein C-term	6|IPR000731; Sterol-sensing domain|IPR003392; Protein patched/dispatched|IPR003952; Fumarate reductase/succinate dehydrogenase, FAD-binding site|IPR003953; FAD-dependent oxidoreductase 2, FAD binding domain|IPR015939; Fumarate reductase/succinate dehydrogenase flavoprotein-like, C-terminal|IPR032190; Niemann-Pick C1, N-terminal	biological_process:GO:0055114//oxidation-reduction process;cellular_component:GO:0016021//integral component of membrane;molecular_function:GO:0016491//oxidoreductase activity;
895_1	10.2685	NA	18070	FKDELDTMK;TNHQGVYVLQDNK;VGQSLVER	1;1;1	3	4	0.1911	16403;25683;25684;10558	710032	54617.8	XP_021370596.1/2.28338e-104/trafficking protein particle complex subunit 6B-like [Mizuhopecten yessoensis] &gt;OWF42194.1 hypothetical protein KP79_PYT10546 [Mizuhopecten yessoensis]	Q86SZ2/2e-84/TPC6B_HUMAN Trafficking protein particle complex subunit 6B OS=Homo sapiens OX=9606 GN=TRAPPC6B PE=1 SV=1	myi:110461466/4e-105/trafficking protein particle complex subunit 6B-like; K20304 trafficking protein particle complex subunit 6	Hs20541692/9e-85/[U] KOG3316 Transport protein particle (TRAPP) complex subunit	A0A210Q0B3/4e-104/A0A210Q0B3_MIZYE Uncharacterized protein OS=Mizuhopecten yessoensis OX=6573 GN=KP79_PYT10546 PE=4 SV=1	PF04051/7.8E-49/Transport protein particle (TRAPP) component	2|IPR007194; Transport protein particle (TRAPP) component|IPR037992; TRAPP complex, Trs33 subunit	biological_process:GO:0043087//regulation of GTPase activity;GO:0048193//Golgi vesicle transport;
906_1	8.10119	NA	68299.5	CPAGFTLIDR;EEADLWQDGLFR;YLCVER	1;1;1	3	3	0.0467	17054;25020;9430	1.78066e+06	49462.7	XP_011413894.1/3.90232e-106/PREDICTED: multivesicular body subunit 12B isoform X1 [Crassostrea gigas]	Q9H7P6/7e-29/MB12B_HUMAN Multivesicular body subunit 12B OS=Homo sapiens OX=9606 GN=MVB12B PE=1 SV=2	crg:105318454/6e-107/multivesicular body subunit 12B isoform X1; K12186 ESCRT-I complex subunit MVB12	Hs22046082/3e-29/[S] KOG4000 Uncharacterized conserved protein	K1PEQ3/2e-105/K1PEQ3_CRAGI Multivesicular body subunit 12B OS=Crassostrea gigas OX=29159 GN=CGI_10002363 PE=4 SV=1	PTHR31547/2.4E-55/--	2|IPR018798; Multivesicular body subunit 12|IPR023341; MABP domain	cellular_component:GO:0000813//ESCRT I complex;
913_1	7.361	NA	34811.8	DYLLGDNSDIVATDSQK;NFVTDEFR	1;1	2	2	0.0825	28528;13690	17656.5	767.675	XP_011450307.1/1.63611e-151/PREDICTED: uricase-like [Crassostrea gigas]	P11645/1e-99/URIC_RABIT Uricase OS=Oryctolagus cuniculus OX=9986 GN=UOX PE=2 SV=1	crg:105344267/3e-152/uricase-like; K00365 urate oxidase [EC:1.7.3.3]	7297292/4e-95/[Q] KOG1599 Uricase (urate oxidase)	A0A210R0W3/8e-149/A0A210R0W3_MIZYE Uricase OS=Mizuhopecten yessoensis OX=6573 GN=KP79_PYT04373 PE=3 SV=1	PF01014/3.1E-31/Uricase	1|IPR002042; Uricase	NA
387_1	8.66045	NA	28362.5	LDTGNFSWGSEAISR;VDHALEEEFSTGR	1;1	2	3	0.1124	27038;25216;25215	924562	61637.5	XP_022340500.1/3.73208e-134/40S ribosomal protein S8-like [Crassostrea virginica]	Q8WQI5/2e-107/RS8_SPOFR 40S ribosomal protein S8 OS=Spodoptera frugiperda OX=7108 GN=RpS8 PE=2 SV=1	crg:105340032/6e-134/40S ribosomal protein S8; K02995 small subunit ribosomal protein S8e	Hs4506743/2e-103/[J] KOG3283 40S ribosomal protein S8	A0A194AQZ8/2e-152/A0A194AQZ8_PINFU 40S ribosomal protein S8 OS=Pinctada fucata OX=50426 PE=3 SV=1	PTHR10394/4.3E-102/--	3|IPR001047; Ribosomal protein S8e|IPR018283; Ribosomal protein S8e, conserved site|IPR022309; Ribosomal protein S8e/ribosomal biogenesis NSA2	biological_process:GO:0006412//translation;cellular_component:GO:0005622//intracellular;GO:0005840//ribosome;molecular_function:GO:0003735//structural constituent of ribosome;
739_1	18.9303	NA	17657.7	AGELSEEEIDK;FGQVMSNALDNK;IAFAMTAIK;ILNTNIDGR;IPDWFLNR;VVTIMQNPR	1;1;1;1;1;1	6	14	0.3816	18904;18902;18903;18901;18905;22130;22157;12290;13405;13404;14539;14509;14425;14906	5.5571e+07	4.63091e+06	NP_001292296.1/1.9005e-102/40S ribosomal protein S18 [Crassostrea gigas] &gt;BAE16014.1 ribosomal protein S18 [Crassostrea gigas]	Q8IT98/5e-100/RS18_ARGIR 40S ribosomal protein S18 OS=Argopecten irradians OX=31199 GN=RPS18 PE=2 SV=1	crg:105347800/3e-103/40S ribosomal protein S18; K02964 small subunit ribosomal protein S18e	Hs11968182/6e-96/[J] KOG3311 Ribosomal protein S18	Q4H450/3e-102/Q4H450_CRAGI Ribosomal protein S18 OS=Crassostrea gigas OX=29159 PE=2 SV=1	PS50159/35.408/Ribosomal protein S13 family profile.	2|IPR001892; Ribosomal protein S13|IPR018269; Ribosomal protein S13, conserved site	biological_process:GO:0006412//translation;cellular_component:GO:0005622//intracellular;GO:0005840//ribosome;molecular_function:GO:0003723//RNA binding;GO:0003735//structural constituent of ribosome;biological_process:GO:0006412//translation;cellular_component:GO:0005840//ribosome;molecular_function:GO:0003723//RNA binding;GO:0003735//structural constituent of ribosome;
191_1	5.29915	NA	15549.6	NNSSFLLK;TLGVEAAK	1;1	2	2	0.1185	11334;8479	671278	61025.3	ACR24952.1/5.69205e-67/ribosomal protein L28, partial [Lepidochitona cinerea]	P41105/5e-59/RL28_MOUSE 60S ribosomal protein L28 OS=Mus musculus OX=10090 GN=Rpl28 PE=1 SV=2	myi:110455639/4e-67/60S ribosomal protein L28-like; K02903 large subunit ribosomal protein L28e	Hs13904866/7e-59/[J] KOG3412 60S ribosomal protein L28	A0A077GZK7/4e-67/A0A077GZK7_MYTTR Ribosomal protein L28 (Fragment) OS=Mytilus trossulus OX=6551 PE=2 SV=1	PTHR10544/1.5E-46/--	2|IPR002672; Ribosomal protein L28e|IPR029004; Ribosomal L28e/Mak16	biological_process:GO:0006412//translation;cellular_component:GO:0005622//intracellular;GO:0005840//ribosome;molecular_function:GO:0003735//structural constituent of ribosome;
867_1	25.9813	NA	36120.7	FPGYDGESGDYNSEVHR;GAVDGGLDIPHSTK;LEGDHILCAAYSHELPR;NHIFGQHVGNYMR;NLSEEDEDAYK;VGLTNYAAAYCTGLLLAR	1;1;1;1;1;1	6	8	0.2903	28974;28973;22783;29298;29299;26440;21337;28963	2.58768e+06	136194	XP_022327080.1/3.42064e-176/60S ribosomal protein L5-like [Crassostrea virginica]	Q26481/8e-162/RL5_STYCL 60S ribosomal protein L5 OS=Styela clava OX=7725 GN=RPL5 PE=3 SV=3	crg:105338604/1e-176/60S ribosomal protein L5; K02932 large subunit ribosomal protein L5e	Hs14591909/1e-152/[J] KOG0875 60S ribosomal protein L5	K1RPF7/7e-172/K1RPF7_CRAGI 60S ribosomal protein L5 OS=Crassostrea gigas OX=29159 GN=CGI_10027192 PE=3 SV=1	PF17144/2.8E-91/Ribosomal large subunit proteins 60S L5, and 50S L18	2|IPR005485; Ribosomal protein L5 eukaryotic/L18 archaeal|IPR025607; Ribosomal protein L5 eukaryotic/L18 archaeal, C-terminal	biological_process:GO:0006412//translation;cellular_component:GO:0005622//intracellular;GO:0005840//ribosome;molecular_function:GO:0003735//structural constituent of ribosome;GO:0008097//5S rRNA binding;biological_process:GO:0006412//translation;cellular_component:GO:0005840//ribosome;molecular_function:GO:0003735//structural constituent of ribosome;GO:0008097//5S rRNA binding;
16_4	18.9906	NA	68123.5	AFDEAIAELDTLNEDSYK;ATEAAAEMPPTHPIR;DSTLIMQLLR;VVSSIENK;YDDMAESMK;YLAEVSEGDSR	1;1;0;1;1;1	5	5	0.1183	29674;26609;18116;10302;15340;19079	2.24065e+06	58964.5	XP_019760417.1/2.23722e-116/PREDICTED: 14-3-3 protein zeta isoform X2 [Dendroctonus ponderosae]	Q2F637/2e-113/1433Z_BOMMO 14-3-3 protein zeta OS=Bombyx mori OX=7091 GN=14-3-3zeta PE=2 SV=2	nvl:108567079/5e-116/14-3-3 protein zeta isoform X1; K16197 14-3-3 protein beta/theta/zeta	Hs4507953/3e-112/[O] KOG0841 Multifunctional chaperone (14-3-3 family)	A0A3B3TAW9/2e-116/A0A3B3TAW9_9TELE Uncharacterized protein OS=Paramormyrops kingsleyae OX=1676925 PE=3 SV=1	SM00101/1.9E-134/--	4|IPR000308; 14-3-3 protein|IPR001790; Ribosomal protein L10P|IPR023409; 14-3-3 protein, conserved site|IPR023410; 14-3-3 domain	biological_process:GO:0042254//ribosome biogenesis;cellular_component:GO:0005622//intracellular;molecular_function:GO:0019904//protein domain specific binding;molecular_function:GO:0019904//protein domain specific binding;
442_1	7.61906	NA	55181.4	DPLILSVAAHDLGEYVR;FEALIAVQK	1;1	2	2	0.0544	28608;13484	119090	3969.67	XP_022338993.1/0/V-type proton ATPase subunit H-like isoform X2 [Crassostrea virginica]	Q9V3J1/0.0/VATH_DROME V-type proton ATPase subunit H OS=Drosophila melanogaster OX=7227 GN=VhaSFD PE=2 SV=2	crg:105318342/0.0/V-type proton ATPase subunit H isoform X1; K02144 V-type H+-transporting ATPase subunit H	Hs7706262/0.0/[C] KOG2759 Vacuolar H+-ATPase V1 sector, subunit H	K1QA50/0.0/K1QA50_CRAGI V-type proton ATPase subunit H OS=Crassostrea gigas OX=29159 GN=CGI_10014337 PE=3 SV=1	PF11698/5.5E-44/V-ATPase subunit H	2|IPR004908; ATPase, V1 complex, subunit H|IPR011987; ATPase, V1 complex, subunit H, C-terminal	biological_process:GO:0015991//ATP hydrolysis coupled proton transport;cellular_component:GO:0000221//vacuolar proton-transporting V-type ATPase, V1 domain;molecular_function:GO:0046961//proton-transporting ATPase activity, rotational mechanism;biological_process:GO:0015991//ATP hydrolysis coupled proton transport;cellular_component:GO:0000221//vacuolar proton-transporting V-type ATPase, V1 domai…
834_1	2.96913	NA	141373	TIAEEDLPYR	1	1	1	0.0079	18594	888818	13265.9	XP_011428125.1/0/PREDICTED: tudor domain-containing protein 7 [Crassostrea gigas] &gt;XP_011428126.1 PREDICTED: tudor domain-containing protein 7 [Crassostrea gigas]	Q5M7P8/1e-28/TDRD7_XENTR Tudor domain-containing protein 7 OS=Xenopus tropicalis OX=8364 GN=tdrd7 PE=2 SV=1	crg:105328808/0.0/tudor domain-containing protein 7; K18405 tudor domain-containing protein 1/4/6/7	Hs22046371/1e-22/[K] KOG2039 Transcriptional coactivator p100	K1QZD2/2e-143/K1QZD2_CRAGI Tudor domain-containing protein 7 OS=Crassostrea gigas OX=29159 GN=CGI_10018436 PE=4 SV=1	PTHR22948:SF14/1.7E-92/--	2|IPR002999; Tudor domain|IPR025605; OST-HTH/LOTUS domain	NA
137_3	14.2473	NA	50446.3	IGGIGTVPVGR;LPLQDVYK;QLIVGVNK;QTVAVGVIK;TFYAQVIILNHPGEIR;TLFNALDAILPPQRPTEKPLR;VETGILKPGMVVTFAPVNVTTEVK;YYITIIDAPGHR	0;0;1;0;1;1;1;0	4	6	0.2364	13661;12500;10158;11164;28647;28646;31267;31266;31757;23901;23900	1.91061e+07	658832	AKG51552.1/0/elongation factor 1-alpha, partial [Tachysurus fulvidraco] &gt;AMQ62896.1 elongation factor 1-alpha 1, partial [Tachysurus fulvidraco]	Q92005/0.0/EF1A_DANRE Elongation factor 1-alpha OS=Danio rerio OX=7955 GN=eef1a PE=2 SV=1	ipu:100526699/0.0/elongation factor 1-alpha; K03231 elongation factor 1-alpha	Hs4503475/0.0/[J] KOG0052 Translation elongation factor EF-1 alpha/Tu	A0A194ALQ1/0.0/A0A194ALQ1_PINFU Elongation factor 1-alpha OS=Pinctada fucata OX=50426 PE=3 SV=1	PR00315/2.0E-24/GTP-binding elongation factor signature	4|IPR000795; Transcription factor, GTP-binding domain|IPR004160; Translation elongation factor EFTu/EF1A, C-terminal|IPR004161; Translation elongation factor EFTu-like, domain 2|IPR031157; Tr-type G domain, conserved site	molecular_function:GO:0003924//GTPase activity;GO:0005525//GTP binding;cellular_component:GO:0005737//cytoplasm;molecular_function:GO:0003746//translation elongation factor activity;GO:0005525//GTP binding;GO:0003924//GTPase activity;
137_1	7.61906	NA	50999.6	EHALLAYTLGVK;IGGIGTVPVGR;LPLQDVYK;QTVAVGVIK;STSTGHLIYK;YYVTIIDAPGHR	0;0;0;0;1;1	2	3	0.1339	21399;21398;13661;12500;11164;15881;23613;23612	1.5011e+06	53610.6	XP_002604722.1/0/hypothetical protein BRAFLDRAFT_122567 [Branchiostoma floridae] &gt;EEN60732.1 hypothetical protein BRAFLDRAFT_122567 [Branchiostoma floridae]	Q92005/0.0/EF1A_DANRE Elongation factor 1-alpha OS=Danio rerio OX=7955 GN=eef1a PE=2 SV=1	sdu:111220816/0.0/elongation factor 1-alpha; K03231 elongation factor 1-alpha	7303554/0.0/[J] KOG0052 Translation elongation factor EF-1 alpha/Tu	A0A194ALQ1/0.0/A0A194ALQ1_PINFU Elongation factor 1-alpha OS=Pinctada fucata OX=50426 PE=3 SV=1	PF03144/4.3E-14/Elongation factor Tu domain 2	4|IPR000795; Transcription factor, GTP-binding domain|IPR004160; Translation elongation factor EFTu/EF1A, C-terminal|IPR004161; Translation elongation factor EFTu-like, domain 2|IPR031157; Tr-type G domain, conserved site	molecular_function:GO:0003924//GTPase activity;GO:0005525//GTP binding;cellular_component:GO:0005622//intracellular;GO:0005737//cytoplasm;molecular_function:GO:0003746//translation elongation factor activity;GO:0005525//GTP binding;GO:0003924//GTPase activity;
556_1	21.2645	NA	28918.9	CTDSALVVK;DSLDVEIVTAK;QGPAPFK;QKPPVFELQNK;QVVYLFK;VNSIILDSCK;WVIEYQVGNK	1;1;1;1;1;1;1	7	10	0.2381	12862;18110;7834;21725;21706;21294;10750;17037;17056;19357	2.11975e+06	111566	XP_009066708.1/1.11254e-102/hypothetical protein LOTGIDRAFT_109031, partial [Lottia gigantea] &gt;ESO82922.1 hypothetical protein LOTGIDRAFT_109031, partial [Lottia gigantea]	P40124/2e-87/CAP1_MOUSE Adenylyl cyclase-associated protein 1 OS=Mus musculus OX=10090 GN=Cap1 PE=1 SV=4	mdl:103569262/1e-97/adenylyl cyclase-associated protein 1 isoform X1; K17261 adenylyl cyclase-associated protein	7296114/2e-91/[ZT] KOG2675 Adenylate cyclase-associated protein (CAP/Srv2p)	V3ZFQ1/2e-102/V3ZFQ1_LOTGI Adenylyl cyclase-associated protein (Fragment) OS=Lottia gigantea OX=225164 GN=LOTGIDRAFT_109031 PE=3 SV=1	SM00673/7.7E-11/--	6|IPR001837; Adenylate cyclase-associated CAP|IPR006599; CARP motif|IPR013912; Adenylate cyclase-associated CAP, C-terminal|IPR013992; Adenylate cyclase-associated CAP, N-terminal|IPR017901; C-CAP/cofactor C-like domain|IPR028417; CAP, conserved site, C-terminal	biological_process:GO:0007010//cytoskeleton organization;molecular_function:GO:0003779//actin binding;biological_process:GO:0007010//cytoskeleton organization;molecular_function:GO:0003779//actin binding;
96_2	4.33022	NA	17496.6	HVVFGQVTSGYDQVVK;TTWLDGK;VIPGFMCQGGDFTR	1;0;0	1	2	0.2242	27938;27937;9083;26684;26555	1.77749e+06	126964	XP_015780894.1/7.92929e-100/PREDICTED: peptidyl-prolyl cis-trans isomerase 1-like [Acropora digitifera]	P91791/2e-94/PPIA_HEMPU Peptidyl-prolyl cis-trans isomerase OS=Hemicentrotus pulcherrimus OX=7650 PE=2 SV=1	epa:110250522/1e-98/peptidyl-prolyl cis-trans isomerase-like; K09565 peptidyl-prolyl isomerase F (cyclophilin D) [EC:5.2.1.8]	At4g38740/7e-89/[O] KOG0865 Cyclophilin type peptidyl-prolyl cis-trans isomerase	A4UIY6/2e-98/A4UIY6_EXAPA Peptidyl-prolyl cis-trans isomerase OS=Exaiptasia pallida OX=1720309 PE=2 SV=1	PTHR11071:SF377/2.0E-90/--	3|IPR002130; Cyclophilin-type peptidyl-prolyl cis-trans isomerase domain|IPR020892; Cyclophilin-type peptidyl-prolyl cis-trans isomerase, conserved site|IPR024936; Cyclophilin-type peptidyl-prolyl cis-trans isomerase	biological_process:GO:0000413//protein peptidyl-prolyl isomerization;GO:0006457//protein folding;molecular_function:GO:0003755//peptidyl-prolyl cis-trans isomerase activity;
370_1	11.6296	NA	26508.4	ISNYAWDQSDK;LQVFGLDNK;TWEFVTDR	1;1;1	3	3	0.1223	21675;13851;14291	757605	47350.3	XP_011422401.1/3.42272e-65/PREDICTED: calcyclin-binding protein [Crassostrea gigas] &gt;EKC28333.1 Calcyclin-binding protein [Crassostrea gigas]	Q9CXW3/2e-54/CYBP_MOUSE Calcyclin-binding protein OS=Mus musculus OX=10090 GN=Cacybp PE=1 SV=1	crg:105324875/5e-66/calcyclin-binding protein; K04507 calcyclin binding protein	Hs7656952/1e-53/[T] KOG3260 Calcyclin-binding protein CacyBP	K1Q337/6e-65/K1Q337_CRAGI Calcyclin-binding protein OS=Crassostrea gigas OX=29159 GN=CGI_10011554 PE=4 SV=1	PF09032/1.5E-15/Siah interacting protein, N terminal	3|IPR007052; CS domain|IPR007699; SGS domain|IPR015120; Siah interacting protein, N-terminal	NA
577_1	7.361	NA	46265.3	ISTQELQQALVNGNWSHFNSETCR;LMIGMFDK	1;1	2	4	0.0775	32897;32900;12361;12036	0	0	XP_022308054.1/1.69702e-92/peflin-like [Crassostrea virginica]	Q6DC93/1e-63/PEF1_DANRE Peflin OS=Danio rerio OX=7955 GN=pef1 PE=2 SV=1	gfr:102040782/4e-23/CAPNS2; calpain small subunit 2; K08583 calpain, small subunit 1	Hs6912582/2e-63/[T] KOG0037 Ca2+-binding protein, EF-Hand protein superfamily	A0A3S1B4T8/3e-94/A0A3S1B4T8_ELYCH Uncharacterized protein OS=Elysia chlorotica OX=188477 GN=EGW08_017225 PE=4 SV=1	PTHR10183:SF272/4.8E-84/--	2|IPR002048; EF-hand domain|IPR018247; EF-Hand 1, calcium-binding site	molecular_function:GO:0005509//calcium ion binding;molecular_function:GO:0005509//calcium ion binding;
444_1	8.95806	NA	19955.2	APVLVALALIECGMK;FEDAVELIR;LNDEGIR	1;1;1	3	3	0.1792	26558;15432;9012	1.04916e+06	95378	XP_022325604.1/2.44819e-118/protein tyrosine phosphatase type IVA 2-like [Crassostrea virginica] &gt;XP_022325610.1 protein tyrosine phosphatase type IVA 2-like [Crassostrea virginica] &gt;XP_022325618.1 protein tyrosine phosphatase type IVA 2-like [Crassostrea virginica]	Q6P9X4/3e-80/TP4A2_RAT Protein tyrosine phosphatase type IVA 2 OS=Rattus norvegicus OX=10116 GN=Ptp4a2 PE=2 SV=1	crg:105340498/1e-117/protein tyrosine phosphatase type IVA 2; K18041 protein tyrosine phosphatase type IVA [EC:3.1.3.48]	Hs4506285/1e-80/[T] KOG2836 Protein tyrosine phosphatase IVA1	A0A210R3W5/1e-111/A0A210R3W5_MIZYE Protein tyrosine phosphatase type IVA 2 OS=Mizuhopecten yessoensis OX=6573 GN=KP79_PYT23838 PE=4 SV=1	PTHR23339:SF65/2.7E-74/--	3|IPR000340; Dual specificity phosphatase, catalytic domain|IPR000387; Tyrosine specific protein phosphatases domain|IPR003595; Protein-tyrosine phosphatase, catalytic	biological_process:GO:0016311//dephosphorylation;molecular_function:GO:0008138//protein tyrosine/serine/threonine phosphatase activity;GO:0016791//phosphatase activity;molecular_function:GO:0008138//protein tyrosine/serine/threonine phosphatase activity;
684_1	13.7355	NA	46952.1	EDIDEIVLVGGSTR;FEELNMDLFR;LSPEDIER;NHIVIQNDNNR	1;1;1;1	4	6	0.1017	25478;21366;12126;22046;22065;22045	449742	16062.2	XP_022323882.1/0/78 kDa glucose-regulated protein [Crassostrea virginica]	Q16956/0.0/BIP_APLCA Endoplasmic reticulum chaperone BiP OS=Aplysia californica OX=6500 PE=1 SV=1	crg:105340370/0.0/78 kDa glucose-regulated protein precursor; K09490 heat shock 70kDa protein 5	Hs16507237/0.0/[O] KOG0100 Molecular chaperones GRP78/BiP/KAR2, HSP70 superfamily	Q75W49/0.0/Q75W49_CRAGI 78kDa glucose regulated protein OS=Crassostrea gigas OX=29159 GN=GRP78 PE=2 SV=1	PR00301/5.1E-43/70kDa heat shock protein signature	2|IPR013126; Heat shock protein 70 family|IPR018181; Heat shock protein 70, conserved site	molecular_function:GO:0005524//ATP binding;
646_1	11.8927	NA	14414.4	ALTPYEK;NELGTLR;QLDELKNELGTLR;VLTVIHQTQK	1;1;1;1	4	7	0.2439	9104;8763;25910;17496;17497;17529;17531	1.96109e+07	3.92218e+06	XP_022328321.1/1.2743e-70/60S ribosomal protein L35-like [Crassostrea virginica]	P17078/6e-62/RL35_RAT 60S ribosomal protein L35 OS=Rattus norvegicus OX=10116 GN=Rpl35 PE=1 SV=3	myi:110451349/2e-63/60S ribosomal protein L35-like; K02918 large subunit ribosomal protein L35e	Hs6005860/5e-62/[J] KOG3436 60S ribosomal protein L35	A0A077H0Q5/3e-66/A0A077H0Q5_MYTTR Ribosomal protein L35 (Fragment) OS=Mytilus trossulus OX=6551 PE=2 SV=1	PS00579/-/Ribosomal protein L29 signature.	2|IPR001854; Ribosomal protein L29/L35|IPR018254; Ribosomal protein L29, conserved site	biological_process:GO:0006412//translation;cellular_component:GO:0005622//intracellular;GO:0005840//ribosome;molecular_function:GO:0003735//structural constituent of ribosome;
196_1	19.0317	NA	17979.1	AVLNNPPQGSK;GFEFPSEGSSASLLTWHEK;KVNVDEYDEEK;SLDLLMK;SSEIENGVK;VNVDEYDEEK	1;1;1;1;1;1	6	11	0.354	16358;16357;29996;29995;22811;9076;12230;12212;19434;19433;19432	4.0295e+06	335792	XP_022325477.1/5.61045e-76/actin-related protein 2/3 complex subunit 5-like [Crassostrea virginica]	Q68FI4/5e-53/APC5A_XENLA Actin-related protein 2/3 complex subunit 5-A OS=Xenopus laevis OX=8355 GN=arpc5-a PE=2 SV=1	crg:105324105/2e-75/actin-related protein 2/3 complex subunit 5; K05754 actin related protein 2/3 complex, subunit 5	Hs5031593/2e-51/[Z] KOG3380 Actin-related protein Arp2/3 complex, subunit ARPC5	K1P137/2e-74/K1P137_CRAGI Actin-related protein 2/3 complex subunit 5 OS=Crassostrea gigas OX=29159 GN=CGI_10000611 PE=3 SV=1	PTHR12644/1.6E-55/--	1|IPR006789; Actin-related protein 2/3 complex subunit 5	biological_process:GO:0030833//regulation of actin filament polymerization;GO:0034314//Arp2/3 complex-mediated actin nucleation;cellular_component:GO:0005885//Arp2/3 protein complex;GO:0015629//actin cytoskeleton;biological_process:GO:0034314//Arp2/3 complex-mediated actin nucleation;cellular_component:GO:0005885//Arp2/3 protein complex;
786_1	2.59745	NA	23315.4	GCVFSFDPVGSYER	1	1	1	0.0667	26882	0	0	XP_009065531.1/6.71896e-112/hypothetical protein LOTGIDRAFT_132853 [Lottia gigantea] &gt;ESO83745.1 hypothetical protein LOTGIDRAFT_132853 [Lottia gigantea]	Q2TBX6/2e-99/PSB1_BOVIN Proteasome subunit beta type-1 OS=Bos taurus OX=9913 GN=PSMB1 PE=1 SV=1	crg:105343419/1e-110/proteasome subunit beta type-1; K02732 20S proteasome subunit beta 6 [EC:3.4.25.1]	Hs4506193/5e-97/[O] KOG0179 20S proteasome, regulatory subunit beta type PSMB1/PRE7	V3ZMS2/1e-111/V3ZMS2_LOTGI Proteasome subunit beta OS=Lottia gigantea OX=225164 GN=LOTGIDRAFT_132853 PE=3 SV=1	PTHR11599:SF59/1.6E-88/--	4|IPR001353; Proteasome, subunit alpha/beta|IPR016050; Proteasome beta-type subunit, conserved site|IPR023333; Proteasome B-type subunit|IPR035202; Proteasome subunit beta 1	biological_process:GO:0051603//proteolysis involved in cellular protein catabolic process;cellular_component:GO:0005839//proteasome core complex;molecular_function:GO:0004175//endopeptidase activity;GO:0004298//threonine-type endopeptidase activity;biological_process:GO:0051603//proteolysis involved in cellular protein catabolic process;cellular_component:GO:0005634//nucleus;GO:0005737//cytoplasm…
840_1	4.33022	NA	25870.2	TSGHLLLGVVR	1	1	2	0.048	17111;17112	55539.4	6171.04	EKC28194.1/6.15809e-121/Double-strand-break repair protein rad21-like protein [Crassostrea gigas]	O93310/1e-92/RAD21_XENLA Double-strand-break repair protein rad21 homolog OS=Xenopus laevis OX=8355 GN=rad21 PE=1 SV=1	crg:105337371/2e-121/double-strand-break repair protein rad21 homolog; K06670 cohesin complex subunit SCC1	Hs5453994/6e-92/[D] KOG1213 Sister chromatid cohesion complex Cohesin, subunit RAD21/SCC1	K1QA72/1e-120/K1QA72_CRAGI Double-strand-break repair protein rad21-like protein OS=Crassostrea gigas OX=29159 GN=CGI_10018385 PE=4 SV=1	PF04825/2.3E-41/N terminus of Rad21 / Rec8 like protein	1|IPR006910; Rad21/Rec8-like protein, N-terminal	molecular_function:GO:0005515//protein binding;cellular_component:GO:0000228//nuclear chromosome;
419_1	12.9907	NA	16319.7	ETEELHHDTVTLDVSR;QQVINDYEAGK;SGAEIETTK	1;1;1	3	6	0.2449	28703;28702;19700;20139;20138;11601	1.8968e+07	2.10755e+06	XP_005103567.1/1.09367e-73/PREDICTED: endothelial differentiation-related factor 1-like [Aplysia californica]	Q6GPQ6/4e-64/EDF1_XENLA Endothelial differentiation-related factor 1 homolog OS=Xenopus laevis OX=8355 GN=edf1 PE=2 SV=1	dpte:113798599/1e-48/LOW QUALITY PROTEIN: ubiquitin thioesterase OTU1-like; K13719 ubiquitin thioesterase OTU1 [EC:3.1.2.-]	Hs4503453/2e-63/[K] KOG3398 Transcription factor MBF1	A0A0B6ZJN6/4e-70/A0A0B6ZJN6_9EUPU Uncharacterized protein OS=Arion vulgaris OX=1028688 GN=ORF67935 PE=4 SV=1	PTHR10245:SF71/1.1E-38/--	2|IPR001387; Cro/C1-type helix-turn-helix domain|IPR013729; Multiprotein bridging factor 1, N-terminal	molecular_function:GO:0043565//sequence-specific DNA binding;molecular_function:GO:0043565//sequence-specific DNA binding;
546_1	11.1679	NA	19323.7	AELMAEEGVK;QCLLMWR;SYSIDVAEIQTSPLFFNK;TPEEWGK	1;1;1;1	4	4	0.2593	15454;13197;29755;9642	297631	29763.1	XP_011418343.1/1.01832e-79/PREDICTED: vacuolar protein-sorting-associated protein 25 [Crassostrea gigas] &gt;EKC18217.1 Vacuolar protein-sorting-associated protein 25 [Crassostrea gigas]	Q6NWF4/2e-68/VPS25_DANRE Vacuolar protein-sorting-associated protein 25 OS=Danio rerio OX=7955 GN=vps25 PE=2 SV=2	crg:105321671/2e-80/vacuolar protein-sorting-associated protein 25; K12189 ESCRT-II complex subunit VPS25	Hs14150155/2e-61/[S] KOG4068 Uncharacterized conserved protein	K1P359/2e-79/K1P359_CRAGI Vacuolar protein-sorting-associated protein 25 OS=Crassostrea gigas OX=29159 GN=CGI_10014146 PE=4 SV=1	PTHR13149/2.9E-55/--	1|IPR008570; ESCRT-II complex, Vps25 subunit	biological_process:GO:0071985//multivesicular body sorting pathway;cellular_component:GO:0000814//ESCRT II complex;biological_process:GO:0043328//protein transport to vacuole involved in ubiquitin-dependent protein catabolic process via the multivesicular body sorting pathway;cellular_component:GO:0000814//ESCRT II complex;molecular_function:GO:0005198//structural molecule activity;GO:0042803//pr…
574_1	2.16251	NA	72868.7	WAVTVINLDR	1	1	1	0.0156	18037	0	0	XP_011416177.1/8.4381e-105/PREDICTED: parafibromin [Crassostrea gigas] &gt;EKC22062.1 Parafibromin [Crassostrea gigas]	Q5ZLM0/2e-79/CDC73_CHICK Parafibromin OS=Gallus gallus OX=9031 GN=CDC73 PE=2 SV=1	crg:105320091/1e-105/parafibromin; K15175 parafibromin	Hs16506830/1e-79/[K] KOG3786 RNA polymerase II assessory factor Cdc73p	K1PDZ9/2e-104/K1PDZ9_CRAGI Parafibromin OS=Crassostrea gigas OX=29159 GN=CGI_10002864 PE=4 SV=1	PF05179/2.8E-52/RNA pol II accessory factor, Cdc73 family, C-terminal	3|IPR007852; Cdc73/Parafibromin|IPR031336; Cell division control protein 73, C-terminal|IPR032041; Paf1 complex subunit Cdc73, N-terminal domain	biological_process:GO:0006368//transcription elongation from RNA polymerase II promoter;GO:0016570//histone modification;cellular_component:GO:0016593//Cdc73/Paf1 complex;biological_process:GO:0006368//transcription elongation from RNA polymerase II promoter;GO:0016570//histone modification;cellular_component:GO:0016593//Cdc73/Paf1 complex;
110_1	4.33022	NA	53834.5	IAQETLEGHQR	1	1	2	0.0228	20543;20542	140219	4523.18	XP_022320506.1/0/flotillin-1-like isoform X2 [Crassostrea virginica]	O61491/0.0/FLOT1_DROME Flotillin-1 OS=Drosophila melanogaster OX=7227 GN=Flo1 PE=2 SV=1	crg:105333709/0.0/flotillin-1-like isoform X1; K07192 flotillin	7303053/0.0/[UZ] KOG2668 Flotillins	A0A210QCN4/0.0/A0A210QCN4_MIZYE Flotillin-1 OS=Mizuhopecten yessoensis OX=6573 GN=KP79_PYT01416 PE=4 SV=1	PTHR13806/2.3E-226/--	3|IPR001107; Band 7 domain|IPR027705; Flotillin family|IPR031905; Flotillin, C-terminal domain	NA
651_1	13.4332	NA	16431.4	AEILYIAK;LPQSLMEER;NDINPVVQEAIR;QFLVENPGLLTDFR	1;1;1;1	4	4	0.3116	11289;15777;22818;27083	2.47644e+06	275160	XP_018399081.1/1.8314e-26/PREDICTED: cytochrome b-c1 complex subunit 7-like [Cyphomyrmex costatus]	P00129/8e-21/QCR7_BOVIN Cytochrome b-c1 complex subunit 7 OS=Bos taurus OX=9913 GN=UQCRB PE=1 SV=3	mdl:106693053/3e-25/cytochrome b-c1 complex subunit 7-like; K00417 ubiquinol-cytochrome c reductase subunit 7	7301665/2e-25/[C] KOG3440 Ubiquinol cytochrome c reductase, subunit QCR7	E9GAN1/2e-25/E9GAN1_DAPPU Cytochrome b-c1 complex subunit 7 OS=Daphnia pulex OX=6669 GN=DAPPUDRAFT_301847 PE=3 SV=1	PF02271/1.2E-28/Ubiquinol-cytochrome C reductase complex 14kD subunit	1|IPR003197; Cytochrome b-c1 complex subunit 7	biological_process:GO:0006122//mitochondrial electron transport, ubiquinol to cytochrome c;cellular_component:GO:0005750//mitochondrial respiratory chain complex III;
610_1	10.9079	NA	38768.7	HWGGGVMGQK;QTATQLFR;SGVNSVTSLVEQK	1;1;1	3	3	0.0914	14378;12259;22337	533663	24257.4	XP_022324822.1/1.25075e-162/60S ribosomal protein L7a-like [Crassostrea virginica]	O57592/1e-144/RL7A_TAKRU 60S ribosomal protein L7a OS=Takifugu rubripes OX=31033 GN=rpl7a PE=3 SV=3	crg:105338870/3e-163/60S ribosomal protein L7a; K02936 large subunit ribosomal protein L7Ae	Hs4506661/2e-141/[J] KOG3166 60S ribosomal protein L7A	K1QL67/6e-162/K1QL67_CRAGI 60S ribosomal protein L7a OS=Crassostrea gigas OX=29159 GN=CGI_10022058 PE=4 SV=1	PS01082/-/Ribosomal protein L7Ae signature.	4|IPR001921; Ribosomal protein L7A/L8|IPR004037; Ribosomal protein L7Ae conserved site|IPR004038; Ribosomal protein L7Ae/L30e/S12e/Gadd45|IPR018492; Ribosomal protein L7Ae/L8/Nhp2 family	biological_process:GO:0042254//ribosome biogenesis;cellular_component:GO:1990904//ribonucleoprotein complex;
549_1	2.01031	NA	43035.1	NLVEFR	1	1	1	0.0151	8307	154022	11001.6	XP_011425386.1/0/PREDICTED: proteasomal ubiquitin receptor ADRM1-B [Crassostrea gigas] &gt;EKC26500.1 Proteasomal ubiquitin receptor ADRM1 [Crassostrea gigas]	Q6NZ09/6e-106/ADRM1_DANRE Proteasomal ubiquitin receptor ADRM1 OS=Danio rerio OX=7955 GN=adrm1b PE=1 SV=1	crg:105326861/0.0/proteasomal ubiquitin receptor ADRM1-B; K06691 26S proteasome regulatory subunit N13	7303250/1e-73/[R] KOG3037 Cell membrane glycoprotein	K1QCL6/0.0/K1QCL6_CRAGI Proteasomal ubiquitin receptor ADRM1 OS=Crassostrea gigas OX=29159 GN=CGI_10012171 PE=4 SV=1	PTHR12225/4.8E-103/--	2|IPR006773; Proteasomal ubiquitin receptor Rpn13/ADRM1|IPR032368; UCH-binding domain	cellular_component:GO:0005634//nucleus;GO:0005737//cytoplasm;cellular_component:GO:0005634//nucleus;GO:0005737//cytoplasm;
527_1	6.36466	NA	70526.6	AVDALNGQDQSGR;GFGFVCFSSPEEATK	1;1	2	2	0.0442	21789;27234	75263.7	2034.15	XP_022345813.1/0/polyadenylate-binding protein 4-like [Crassostrea virginica] &gt;XP_022345821.1 polyadenylate-binding protein 4-like [Crassostrea virginica]	P29341/0.0/PABP1_MOUSE Polyadenylate-binding protein 1 OS=Mus musculus OX=10090 GN=Pabpc1 PE=1 SV=2	crg:105326555/0.0/polyadenylate-binding protein 4-like; K13126 polyadenylate-binding protein	Hs4504715/0.0/[AJ] KOG0123 Polyadenylate-binding protein (RRM superfamily)	K1RJH5/0.0/K1RJH5_CRAGI Polyadenylate-binding protein OS=Crassostrea gigas OX=29159 GN=CGI_10021647 PE=3 SV=1	SM00360/1.4E-23/--	3|IPR000504; RNA recognition motif domain|IPR002004; Polyadenylate-binding protein/Hyperplastic disc protein|IPR003954; RNA recognition motif domain, eukaryote	molecular_function:GO:0003676//nucleic acid binding;GO:0003723//RNA binding;cellular_component:GO:0005737//cytoplasm;molecular_function:GO:0003723//RNA binding;
736_1	39.0302	NA	59395.9	FVFITWVGNEIKPMTK;GPIVSVSK;GSGDISEMK;IEISPEVLSDIGEVR;IIQQLEENTGK;LTVVTTGQDVEELANHMK;SDDKVDNYLVVGHEEDDPTR;VDNYLVVGHEEDDPTR;VTDTVDDITTVK;YGVVHGSVEEK;YQSTFDMSNTVK	1;1;1;1;1;1;1;1;1;1;1	11	12	0.2534	28957;8438;11346;27157;20322;29322;30972;28556;21205;18515;18514;24256	2.93278e+06	88872	XP_022326424.1/9.06776e-111/uncharacterized protein LOC111126230 [Crassostrea virginica] &gt;XP_022326425.1 uncharacterized protein LOC111126230 [Crassostrea virginica] &gt;XP_022326426.1 uncharacterized protein LOC111126230 [Crassostrea virginica] &gt;XP_022326741.1 uncharacterized protein LOC111126410 [Crassostrea virginica] &gt;XP_022326742.1 uncharacterized protein LOC111126410 [Crassostrea v…	P34121/2e-17/COAA_DICDI Coactosin OS=Dictyostelium discoideum OX=44689 GN=coaA PE=1 SV=1	aplc:110988584/7e-76/uncharacterized protein LOC110988584 isoform X1; K20520 drebrin-like protein	HsM7661718/7e-06/[Z] KOG3655 Drebrins and related actin binding proteins	K1QXD4/3e-110/K1QXD4_CRAGI Coactosin OS=Crassostrea gigas OX=29159 GN=CGI_10017742 PE=4 SV=1	SM00102/1.0E-5/--	1|IPR002108; Actin-depolymerising factor homology domain	cellular_component:GO:0005622//intracellular;molecular_function:GO:0003779//actin binding;cellular_component:GO:0005622//intracellular;molecular_function:GO:0003779//actin binding;
157_1	5.36349	NA	16510.1	DYLIGELHPDDK;TNTSFNPPDR	1;1	2	2	0.1486	23829;17029	456089	50676.6	XP_022338811.1/1.30435e-55/cytochrome b5-like [Crassostrea virginica]	P56395/7e-32/CYB5_MOUSE Cytochrome b5 OS=Mus musculus OX=10090 GN=Cyb5a PE=1 SV=2	shx:MS3_03488/5e-12/Cytochrome b5 type B; K17418 large subunit ribosomal protein L37	Hs13385594/1e-29/[C] KOG0537 Cytochrome b5	Q2PDH0/9e-55/Q2PDH0_CRAGI Cytochrome b5 OS=Crassostrea gigas OX=29159 GN=cyt b5 PE=2 SV=1	PS50255/17.98/Cytochrome b5 family, heme-binding domain profile.	1|IPR001199; Cytochrome b5-like heme/steroid binding domain	cellular_component:GO:0016021//integral component of membrane;molecular_function:GO:0046872//metal ion binding;GO:0020037//heme binding;
214_1	15.4228	NA	222174	DGDLLLDYSK;QSLTEEAGWK;SGMDEENINK;SVLHIALR	1;1;1;1	4	4	0.0193	16715;17032;16672;11024	1.5355e+06	12483.7	XP_022344543.1/0/glucose-6-phosphate isomerase-like [Crassostrea virginica]	P08059/0.0/G6PI_PIG Glucose-6-phosphate isomerase OS=Sus scrofa OX=9823 GN=GPI PE=1 SV=3	crg:105332291/0.0/glucose-6-phosphate isomerase; K01810 glucose-6-phosphate isomerase [EC:5.3.1.9]	Hs18201905/0.0/[G] KOG2446 Glucose-6-phosphate isomerase	K1PTI6/0.0/K1PTI6_CRAGI Glucose-6-phosphate isomerase OS=Crassostrea gigas OX=29159 GN=CGI_10007733 PE=3 SV=1	SM00710/4100.0/--	4|IPR001672; Phosphoglucose isomerase (PGI)|IPR004000; Actin family|IPR006626; Parallel beta-helix repeat|IPR018189; Phosphoglucose isomerase, conserved site	biological_process:GO:0006094//gluconeogenesis;GO:0006096//glycolytic process;molecular_function:GO:0004347//glucose-6-phosphate isomerase activity;biological_process:GO:0006094//gluconeogenesis;GO:0006096//glycolytic process;molecular_function:GO:0004347//glucose-6-phosphate isomerase activity;
79_1	7.81501	NA	35144.3	DLHYQYQEEK;GPGLYYVDSDGER;WDLSVDEAR	1;1;1	3	3	0.1022	22403;24085;15398	144033	6858.72	XP_021379330.1/1.44878e-175/proteasome subunit beta type-5-like [Mizuhopecten yessoensis] &gt;OWF38033.1 Proteasome subunit beta type-5 [Mizuhopecten yessoensis]	P28075/5e-121/PSB5_RAT Proteasome subunit beta type-5 OS=Rattus norvegicus OX=10116 GN=Psmb5 PE=1 SV=3	myi:110466860/2e-176/proteasome subunit beta type-5-like; K02737 20S proteasome subunit beta 5 [EC:3.4.25.1]	Hs4506201/7e-121/[O] KOG0175 20S proteasome, regulatory subunit beta type PSMB5/PSMB8/PRE2	A0A194AP54/0.0/A0A194AP54_PINFU Proteasome subunit beta OS=Pinctada fucata OX=50426 PE=3 SV=1	PS51476/56.203/Proteasome beta-type subunit profile.	5|IPR000243; Peptidase T1A, proteasome beta-subunit|IPR001353; Proteasome, subunit alpha/beta|IPR016050; Proteasome beta-type subunit, conserved site|IPR023333; Proteasome B-type subunit|IPR037558; Proteasome subunit beta 5	biological_process:GO:0043161//proteasome-mediated ubiquitin-dependent protein catabolic process;GO:0051603//proteolysis involved in cellular protein catabolic process;cellular_component:GO:0000502//proteasome complex;GO:0005839//proteasome core complex;molecular_function:GO:0004175//endopeptidase activity;GO:0004298//threonine-type endopeptidase activity;biological_process:GO:0051603//proteolysi…
427_1	22.7221	NA	65198.9	AAHQGPDYIFSLLTGYR;AANNGVAPPDLSYQVK;AEAAEFQVLDGPDPEGHMFR;EMIGVIFSR;MPWPHQGLFTDFDK;RPGLLIDAFPSPYDNVEAAK	1;1;1;1;1;1	6	9	0.1638	28869;28870;27060;30552;14248;27658;27659;30335;30336	1.2265e+06	94346.5	EKC19731.1/2.13489e-91/Cytochrome c1, heme protein, mitochondrial [Crassostrea gigas]	P08574/2e-68/CY1_HUMAN Cytochrome c1, heme protein, mitochondrial OS=Homo sapiens OX=9606 GN=CYC1 PE=1 SV=3	crg:105332292/3e-92/cytochrome c1, heme protein, mitochondrial; K00413 ubiquinol-cytochrome c reductase cytochrome c1 subunit	Hs21359867/8e-69/[C] KOG3052 Cytochrome c1	A0A194AM94/4e-155/A0A194AM94_PINFU Uncharacterized protein OS=Pinctada fucata OX=50426 PE=4 SV=1	PTHR10266/5.9E-168/--	2|IPR002326; Cytochrome c1|IPR009056; Cytochrome c-like domain	molecular_function:GO:0009055//electron transfer activity;GO:0020037//heme binding;
862_1	3.28883	NA	36772.5	DYTYDELLTR	1	1	1	0.0303	20733	380639	20033.6	XP_011432160.1/9.4338e-140/PREDICTED: eukaryotic translation initiation factor 2 subunit 2 [Crassostrea gigas]	Q99L45/1e-115/IF2B_MOUSE Eukaryotic translation initiation factor 2 subunit 2 OS=Mus musculus OX=10090 GN=Eif2s2 PE=1 SV=1	crg:105331595/1e-140/eukaryotic translation initiation factor 2 subunit 2; K03238 translation initiation factor 2 subunit 2	Hs4503505/1e-111/[J] KOG2768 Translation initiation factor 2, beta subunit (eIF-2beta)	K1Q5Z6/2e-139/K1Q5Z6_CRAGI Eukaryotic translation initiation factor 2 subunit 2 OS=Crassostrea gigas OX=29159 GN=CGI_10010423 PE=4 SV=1	PTHR23001/1.3E-92/--	1|IPR002735; Translation initiation factor IF2/IF5	biological_process:GO:0006413//translational initiation;molecular_function:GO:0003743//translation initiation factor activity;molecular_function:GO:0003743//translation initiation factor activity;
316_1	10.9776	NA	19370.4	DIFPILR;DLCSLMLDHIR;VEYILEYGK	1;1;1	3	4	0.1525	10248;22919;22920;16073	45675.6	3513.51	XP_022337856.1/5.9538e-80/adenine phosphoribosyltransferase-like [Crassostrea virginica]	P91455/2e-59/APT_CAEEL Adenine phosphoribosyltransferase OS=Caenorhabditis elegans OX=6239 GN=T19B4.3 PE=2 SV=1	crg:105348875/2e-80/adenine phosphoribosyltransferase; K00759 adenine phosphoribosyltransferase [EC:2.4.2.7]	CE13740/9e-60/[F] KOG1712 Adenine phosphoribosyl transferases	A0A0B7AU19/4e-71/A0A0B7AU19_9EUPU Uncharacterized protein (Fragment) OS=Arion vulgaris OX=1028688 GN=ORF137237 PE=3 SV=1	PF00156/9.7E-24/Phosphoribosyl transferase domain	1|IPR000836; Phosphoribosyltransferase domain	biological_process:GO:0009116//nucleoside metabolic process;biological_process:GO:0009116//nucleoside metabolic process;GO:0006168//adenine salvage;cellular_component:GO:0005737//cytoplasm;molecular_function:GO:0003999//adenine phosphoribosyltransferase activity;
661_1	8.66045	NA	24144.3	APTPQEAIQR;QLAQIDGTLSTIEYQR	1;1	2	3	0.1187	15998;28404;28407	2.01388e+06	167823	XP_009051018.1/1.69839e-116/hypothetical protein LOTGIDRAFT_203722 [Lottia gigantea] &gt;ESO98319.1 hypothetical protein LOTGIDRAFT_203722 [Lottia gigantea]	Q5XGW6/1e-92/CHM4B_XENLA Charged multivesicular body protein 4b OS=Xenopus laevis OX=8355 GN=chmp4b PE=2 SV=1	crg:105323904/4e-101/charged multivesicular body protein 4b; K12194 charged multivesicular body protein 4	CE02568/7e-85/[U] KOG1656 Protein involved in glucose derepression and pre-vacuolar endosome protein sorting	V4C976/3e-116/V4C976_LOTGI Uncharacterized protein OS=Lottia gigantea OX=225164 GN=LOTGIDRAFT_203722 PE=4 SV=1	PF03357/1.1E-54/Snf7	1|IPR005024; Snf7 family	biological_process:GO:0007034//vacuolar transport;biological_process:GO:0007034//vacuolar transport;cellular_component:GO:0005622//intracellular;
116_1	10.1552	NA	54295.7	LTPPCLNYDNVLK;QFENLSFITIK;QVAGFIK	1;1;1	3	3	0.0649	26157;22140;8069	28664.9	1302.95	XP_021358320.1/0/lysosomal protective protein-like [Mizuhopecten yessoensis]	Q3MI05/8e-159/PPGB_BOVIN Lysosomal protective protein OS=Bos taurus OX=9913 GN=CTSA PE=2 SV=1	myi:110453620/0.0/lysosomal protective protein-like; K13289 cathepsin A (carboxypeptidase C) [EC:3.4.16.5]	Hs4505989/8e-158/[OE] KOG1282 Serine carboxypeptidases (lysosomal cathepsin A)	V4AIP2/0.0/V4AIP2_LOTGI Carboxypeptidase OS=Lottia gigantea OX=225164 GN=LOTGIDRAFT_159616 PE=3 SV=1	PS00131/-/Serine carboxypeptidases, serine active site.	3|IPR001563; Peptidase S10, serine carboxypeptidase|IPR018202; Serine carboxypeptidase, serine active site|IPR033124; Serine carboxypeptidases, histidine active site	biological_process:GO:0006508//proteolysis;molecular_function:GO:0004185//serine-type carboxypeptidase activity;molecular_function:GO:0004185//serine-type carboxypeptidase activity;
674_1	2.15241	NA	55013.6	MYTGVFDIVSLR	1	1	1	0.0241	23526	0	0	XP_011441796.1/0/PREDICTED: alanine--glyoxylate aminotransferase 2, mitochondrial [Crassostrea gigas] &gt;EKC31351.1 Alanine--glyoxylate aminotransferase 2, mitochondrial [Crassostrea gigas]	Q17QF0/0.0/AGT2_BOVIN Alanine--glyoxylate aminotransferase 2, mitochondrial OS=Bos taurus OX=9913 GN=AGXT2 PE=2 SV=1	crg:105338391/0.0/alanine--glyoxylate aminotransferase 2, mitochondrial; K00827 alanine-glyoxylate transaminase / (R)-3-amino-2-methylpropionate-pyruvate transaminase [EC:2.6.1.44 2.6.1.40]	7296572/0.0/[E] KOG1404 Alanine-glyoxylate aminotransferase AGT2	K1RB89/0.0/K1RB89_CRAGI Alanine--glyoxylate aminotransferase 2, mitochondrial OS=Crassostrea gigas OX=29159 GN=CGI_10019208 PE=3 SV=1	PTHR11986/1.9E-192/--	1|IPR005814; Aminotransferase class-III	molecular_function:GO:0008483//transaminase activity;GO:0030170//pyridoxal phosphate binding;molecular_function:GO:0008483//transaminase activity;GO:0030170//pyridoxal phosphate binding;
186_1	2.96913	NA	17936.1	QQDFMLQVNK	1	1	1	0.0649	19752	387154	43017.2	XP_022316319.1/3.18772e-71/plasminogen receptor (KT)-like [Crassostrea virginica] &gt;XP_022316320.1 plasminogen receptor (KT)-like [Crassostrea virginica] &gt;XP_022316321.1 plasminogen receptor (KT)-like [Crassostrea virginica] &gt;XP_022317376.1 plasminogen receptor (KT)-like [Crassostrea virginica] &gt;XP_022317377.1 plasminogen receptor (KT)-like [Crassostrea virginica] &gt;XP_022317378.1 pl…	D4ACN8/2e-47/PLRKT_RAT Plasminogen receptor (KT) OS=Rattus norvegicus OX=10116 GN=Plgrkt PE=1 SV=1	NA	Hs8923932/8e-45/[S] KOG4544 Uncharacterized conserved protein	V4BDI0/3e-65/V4BDI0_LOTGI Uncharacterized protein OS=Lottia gigantea OX=225164 GN=LOTGIDRAFT_194783 PE=4 SV=1	PTHR13411/1.6E-54/--	1|IPR019319; Protein of unknown function DUF2368	cellular_component:GO:0016021//integral component of membrane;
504_1	24.2486	NA	20215.1	AMVDVSHFSPEEVNVK;ANNRPPQGTGMSQVVNDDK;DFFDFPTPSR;ERPIPIEHVK;LFGSPYGSMWDDPWAR;STLSHDGVLSVSAPK	1;1;1;1;1;1	6	11	0.4859	28106;28105;29609;29675;19152;18858;18857;28722;28820;25393;25394	6.4679e+06	497531	AJK26930.1/1.32356e-127/heat shock protein 20 [Pinctada martensii]	P82147/8e-39/L2EFL_DROME Protein lethal(2)essential for life OS=Drosophila melanogaster OX=7227 GN=l(2)efl PE=1 SV=1	obi:106878386/2e-45/alpha-crystallin A chain-like; K09542 crystallin, alpha B	7291618/3e-39/[O] KOG3591 Alpha crystallins	A0A0C5A9S6/2e-127/A0A0C5A9S6_PINIB HSP20 protein OS=Pinctada imbricata OX=66713 GN=HSP20 PE=2 SV=1	PR00299/2.0E-29/Alpha crystallin signature	4|IPR001436; Alpha crystallin/Heat shock protein|IPR002068; Alpha crystallin/Hsp20 domain|IPR003090; Alpha-crystallin, N-terminal|IPR031107; Small heat shock protein HSP20	molecular_function:GO:0005212//structural constituent of eye lens;
77_1	24.8582	NA	21471.7	ALVDGPATGVK;ANLSDFDR;ENMSEQWEK;LCVIMDIIDQNR;LIDVEFGK;TMHLTGLK;VAMIAYGK	1;1;1;1;1;1;1	7	13	0.3459	13700;13697;11642;11661;11643;17859;18286;25227;25519;11285;10835;9803;10105	3.23464e+07	2.15643e+06	AAN05609.1/4.6122e-61/ribosomal protein L14, partial [Argopecten irradians]	O46160/2e-56/RL14_LUMRU 60S ribosomal protein L14 OS=Lumbricus rubellus OX=35632 GN=RPL14 PE=3 SV=1	crg:105332844/2e-59/60S ribosomal protein L14; K02875 large subunit ribosomal protein L14e	Hs20555164/1e-44/[J] KOG3421 60S ribosomal protein L14	A0A3S1BMC1/3e-62/A0A3S1BMC1_ELYCH Uncharacterized protein OS=Elysia chlorotica OX=188477 GN=EGW08_005298 PE=4 SV=1	PF01929/1.8E-28/Ribosomal protein L14	1|IPR002784; Ribosomal protein L14e domain	biological_process:GO:0006412//translation;cellular_component:GO:0005622//intracellular;GO:0005840//ribosome;molecular_function:GO:0003735//structural constituent of ribosome;
823_1	6.63134	NA	40405.1	LHQNDVAINEVLR;VVVHPLVLLSVVDHFNR	1;1	2	3	0.0836	25777;29053;29052	1.64638e+06	96845.9	XP_011433876.1/0/PREDICTED: 26S proteasome non-ATPase regulatory subunit 7 [Crassostrea gigas] &gt;EKC28114.1 26S proteasome non-ATPase regulatory subunit 7 [Crassostrea gigas]	P26270/2e-168/PSMD7_DROME 26S proteasome non-ATPase regulatory subunit 7 OS=Drosophila melanogaster OX=7227 GN=Rpn8 PE=1 SV=6	crg:105332852/0.0/26S proteasome non-ATPase regulatory subunit 7; K03038 26S proteasome regulatory subunit N8	7291779/8e-169/[O] KOG1556 26S proteasome regulatory complex, subunit RPN8/PSMD7	K1Q9Z6/0.0/K1Q9Z6_CRAGI 26S proteasome non-ATPase regulatory subunit 7 OS=Crassostrea gigas OX=29159 GN=CGI_10009677 PE=4 SV=1	PF13012/3.5E-35/Maintenance of mitochondrial structure and function	4|IPR000555; JAB1/MPN/MOV34 metalloenzyme domain|IPR024969; Rpn11/EIF3F, C-terminal|IPR033858; 26S Proteasome non-ATPase regulatory subunit 7/8|IPR037518; MPN domain	cellular_component:GO:0005838//proteasome regulatory particle;molecular_function:GO:0005515//protein binding;cellular_component:GO:0005838//proteasome regulatory particle;
150_1	4.33022	NA	70446.6	LIAGPYLIVITK	1	1	1	0.0195	21064	0	0	EKC33652.1/0/Phosphatidylinositide phosphatase SAC1 [Crassostrea gigas]	Q9NTJ5/0.0/SAC1_HUMAN Phosphatidylinositide phosphatase SAC1 OS=Homo sapiens OX=9606 GN=SACM1L PE=1 SV=2	crg:105325477/0.0/phosphatidylinositide phosphatase SAC1; K21797 phosphatidylinositol 4-phosphatase [EC:3.1.3.-]	Hs7662414/6e-79/[I] KOG1890 Phosphoinositide phosphatase SAC1	K1QAG7/0.0/K1QAG7_CRAGI Phosphatidylinositide phosphatase SAC1 OS=Crassostrea gigas OX=29159 GN=CGI_10020097 PE=4 SV=1	PTHR11200/6.9E-223/--	1|IPR002013; SAC domain	molecular_function:GO:0042578//phosphoric ester hydrolase activity;cellular_component:GO:0016021//integral component of membrane;molecular_function:GO:0042578//phosphoric ester hydrolase activity;
445_1	2.1124	NA	18348.3	SWDIALGPLK	1	1	1	0.0613	15685	0	0	XP_022286276.1/1.9387e-81/ER membrane protein complex subunit 4-like [Crassostrea virginica]	Q6PBF7/1e-62/EMC4_XENTR ER membrane protein complex subunit 4 OS=Xenopus tropicalis OX=8364 GN=emc4 PE=2 SV=1	nai:NECAME_04312/1e-34/leucine carboxyl methyltransferase; K18203 [phosphatase 2A protein]-leucine-carboxy methyltransferase [EC:2.1.1.233]	Hs7705997/9e-62/[S] KOG3318 Predicted membrane protein	A0A0L8G191/4e-76/A0A0L8G191_OCTBM ER membrane protein complex subunit 4 OS=Octopus bimaculoides OX=37653 GN=OCBIM_22002450mg PE=3 SV=1	PTHR19315/8.7E-60/--	1|IPR009445; TMEM85/ER membrane protein complex subunit 4	cellular_component:GO:0016021//integral component of membrane;
28_1	9.11776	NA	47388.9	EYAPISGPPEFCR;IVATVLTDPTLR;NVTVQGVSGTGSLR	1;1;1	3	3	0.0907	25793;20995;22979	0	0	XP_021371283.1/0/aspartate aminotransferase, mitochondrial-like [Mizuhopecten yessoensis] &gt;OWF41825.1 Aspartate aminotransferase, mitochondrial [Mizuhopecten yessoensis]	P12345/0.0/AATM_RABIT Aspartate aminotransferase, mitochondrial OS=Oryctolagus cuniculus OX=9986 GN=GOT2 PE=1 SV=2	myi:110461887/0.0/aspartate aminotransferase, mitochondrial-like; K14455 aspartate aminotransferase, mitochondrial [EC:2.6.1.1]	Hs4504069/0.0/[E] KOG1411 Aspartate aminotransferase/Glutamic oxaloacetic transaminase AAT1/GOT2	A0A210PZB0/0.0/A0A210PZB0_MIZYE Aspartate aminotransferase OS=Mizuhopecten yessoensis OX=6573 GN=KP79_PYT13465 PE=4 SV=1	PF00155/2.7E-93/Aminotransferase class I and II	3|IPR000796; Aspartate/other aminotransferase|IPR004838; Aminotransferases, class-I, pyridoxal-phosphate-binding site|IPR004839; Aminotransferase, class I/classII	biological_process:GO:0006520//cellular amino acid metabolic process;GO:0009058//biosynthetic process;molecular_function:GO:0003824//catalytic activity;GO:0008483//transaminase activity;GO:0030170//pyridoxal phosphate binding;biological_process:GO:0009058//biosynthetic process;GO:0006520//cellular amino acid metabolic process;molecular_function:GO:0080130//L-phenylalanine:2-oxoglutarate aminotran…
963_1	10.0712	NA	52112.9	DVSPYDHSR;NQASVQAIEEGFSTAEAR;SNAVIMLNK	1;1;1	3	4	0.0802	14943;28861;28860;12776	276332	10234.5	XP_021379191.1/0/tyrosine-protein phosphatase non-receptor type 1-like [Mizuhopecten yessoensis]	O13016/7e-117/PTN1_CHICK Tyrosine-protein phosphatase non-receptor type 1 OS=Gallus gallus OX=9031 GN=PTPN1 PE=1 SV=1	myi:110466768/0.0/tyrosine-protein phosphatase non-receptor type 1-like; K05696 tyrosine-protein phosphatase non-receptor type 1 [EC:3.1.3.48]	Hs4506289/4e-117/[T] KOG0789 Protein tyrosine phosphatase	K1RCK0/2e-177/K1RCK0_CRAGI Tyrosine-protein phosphatase non-receptor type 1 OS=Crassostrea gigas OX=29159 GN=CGI_10025668 PE=4 SV=1	PF00102/8.4E-67/Protein-tyrosine phosphatase	4|IPR000242; PTP type protein phosphatase|IPR000387; Tyrosine specific protein phosphatases domain|IPR003595; Protein-tyrosine phosphatase, catalytic|IPR016130; Protein-tyrosine phosphatase, active site	biological_process:GO:0006470//protein dephosphorylation;GO:0016311//dephosphorylation;molecular_function:GO:0004725//protein tyrosine phosphatase activity;GO:0016791//phosphatase activity;
626_1	8.66045	NA	25223.1	DSVATAQALDESLFR;GFAYVEFADK	1;1	2	2	0.1111	26911;16973	189685	17244.1	XP_022339045.1/1.33559e-115/polyadenylate-binding protein 2-B-like [Crassostrea virginica]	Q28165/7e-74/PABP2_BOVIN Polyadenylate-binding protein 2 OS=Bos taurus OX=9913 GN=PABPN1 PE=1 SV=3	crg:105334534/4e-109/polyadenylate-binding protein 2-B isoform X1; K14396 polyadenylate-binding protein 2	7304089/4e-74/[A] KOG4209 Splicing factor RNPS1, SR protein superfamily	K1QZW0/9e-102/K1QZW0_CRAGI Polyadenylate-binding protein 2 OS=Crassostrea gigas OX=29159 GN=CGI_10026652 PE=4 SV=1	SM00360/7.2E-21/--	2|IPR000504; RNA recognition motif domain|IPR034911; Polyadenylate-binding protein 2	biological_process:GO:1904247//positive regulation of polynucleotide adenylyltransferase activity;molecular_function:GO:0003676//nucleic acid binding;GO:0003723//RNA binding;
357_1	15.3408	NA	18577.3	GEHLVSMTVEGPPPAEEGIAR;MLQHINYR;TFIGTFK;VLGLVLLR;VPLSGAAGGSGMGR	1;1;1;1;1	5	10	0.324	30419;30348;30350;30418;15401;14922;15404;8951;10453;18823	6.73864e+06	518357	XP_022345999.1/3.66703e-83/small nuclear ribonucleoprotein-associated protein B-like [Crassostrea virginica]	Q9N1Q0/1e-71/RSMB_MACEU Small nuclear ribonucleoprotein-associated protein B' OS=Macropus eugenii OX=9315 GN=SNRPB PE=2 SV=1	crg:105344678/3e-76/small nuclear ribonucleoprotein-associated protein B; K11086 small nuclear ribonucleoprotein B and B'	Hs4507125/1e-63/[K] KOG3168 U1 snRNP component	A0A2T7NGK5/5e-78/A0A2T7NGK5_POMCA Uncharacterized protein OS=Pomacea canaliculata OX=400727 GN=C0Q70_18467 PE=4 SV=1	PTHR10701:SF3/1.0E-69/--	1|IPR001163; LSM domain, eukaryotic/archaea-type	cellular_component:GO:0030529//intracellular ribonucleoprotein complex;GO:0019013//viral nucleocapsid;
791_1	2.96913	NA	22595.9	DSSVVIFSQALK	1	1	1	0.0619	20860	697132	58094.3	XP_014678546.1/7.63077e-50/PREDICTED: mitochondrial import inner membrane translocase subunit Tim21-like [Priapulus caudatus] &gt;XP_014678547.1 PREDICTED: mitochondrial import inner membrane translocase subunit Tim21-like [Priapulus caudatus] &gt;XP_014678548.1 PREDICTED: mitochondrial import inner membrane translocase subunit Tim21-like [Priapulus caudatus]	Q5XKA2/2e-41/TIM21_XENLA Mitochondrial import inner membrane translocase subunit Tim21 OS=Xenopus laevis OX=8355 GN=timm21 PE=2 SV=1	aplc:110983252/1e-48/mitochondrial import inner membrane translocase subunit Tim21-like; K17796 mitochondrial import inner membrane translocase subunit TIM21	7296981/2e-36/[S] KOG4836 Uncharacterized conserved protein	A0A087UF89/9e-47/A0A087UF89_9ARAC Mitochondrial import inner membrane translocase subunit Tim21 (Fragment) OS=Stegodyphus mimosarum OX=407821 GN=X975_15092 PE=4 SV=1	PF08294/1.5E-36/TIM21	1|IPR013261; Mitochondrial import inner membrane translocase subunit Tim21	biological_process:GO:0030150//protein import into mitochondrial matrix;cellular_component:GO:0005744//mitochondrial inner membrane presequence translocase complex;
123_1	5.74102	NA	110294	SLENTPEENR;VIQCVTDHGK	1;1	2	2	0.0204	18074;17219	156245	2604.08	XP_022339794.1/0/LOW QUALITY PROTEIN: exocyst complex component 2-like [Crassostrea virginica]	Q96KP1/0.0/EXOC2_HUMAN Exocyst complex component 2 OS=Homo sapiens OX=9606 GN=EXOC2 PE=1 SV=1	crg:105329401/0.0/exocyst complex component 2; K17637 exocyst complex component 2	Hs21361625/0.0/[U] KOG2347 Sec5 subunit of exocyst complex	A0A210PNB3/0.0/A0A210PNB3_MIZYE Exocyst complex component 2 OS=Mizuhopecten yessoensis OX=6573 GN=KP79_PYT14277 PE=3 SV=1	PTHR13043/1.8E-198/--	2|IPR002909; IPT domain|IPR029175; Exocyst complex component EXOC2/Sec5	biological_process:GO:0006893//Golgi to plasma membrane transport;cellular_component:GO:0000145//exocyst;
728_1	4.33022	NA	83787.4	LLDTEGITIPK	1	1	1	0.015	18400	65568.3	1561.15	XP_021371296.1/0/engulfment and cell motility protein 1-like [Mizuhopecten yessoensis] &gt;OWF41824.1 Engulfment and cell motility protein 1 [Mizuhopecten yessoensis]	Q92556/0.0/ELMO1_HUMAN Engulfment and cell motility protein 1 OS=Homo sapiens OX=9606 GN=ELMO1 PE=1 SV=2	myi:110461895/0.0/engulfment and cell motility protein 1-like; K12366 engulfment and cell motility protein 1	Hs18765700/0.0/[T] KOG2999 Regulator of Rac1, required for phagocytosis and cell migration	A0A210PZB7/0.0/A0A210PZB7_MIZYE Engulfment and cell motility protein 1 OS=Mizuhopecten yessoensis OX=6573 GN=KP79_PYT13464 PE=4 SV=1	PF04727/9.4E-39/ELMO/CED-12 family	4|IPR001849; Pleckstrin homology domain|IPR006816; ELMO domain|IPR024574; Domain of unknown function DUF3361|IPR030719; Engulfment and cell motility protein 3	biological_process:GO:0016477//cell migration;
183_1	17.5414	NA	26324.2	HARPPQQTGVSQVTNDDK;LALEEPK;QDQHGFITR;QYLLPK;VQVDVSHFTPEEISIK	1;1;1;1;1	5	6	0.2456	29275;8701;15742;15179;8062;28362	1.12271e+06	80193.8	AJK26930.1/5.06256e-68/heat shock protein 20 [Pinctada martensii]	P82147/5e-28/L2EFL_DROME Protein lethal(2)essential for life OS=Drosophila melanogaster OX=7227 GN=l(2)efl PE=1 SV=1	obi:106878386/4e-35/alpha-crystallin A chain-like; K09542 crystallin, alpha B	7291618/2e-28/[O] KOG3591 Alpha crystallins	A0A0C5A9S6/9e-68/A0A0C5A9S6_PINIB HSP20 protein OS=Pinctada imbricata OX=66713 GN=HSP20 PE=2 SV=1	PS01031/15.296/Small heat shock protein (sHSP) domain profile.	4|IPR001436; Alpha crystallin/Heat shock protein|IPR002068; Alpha crystallin/Hsp20 domain|IPR003090; Alpha-crystallin, N-terminal|IPR031107; Small heat shock protein HSP20	molecular_function:GO:0005212//structural constituent of eye lens;
785_1	4.88429	NA	13763.2	IPVIVEK;SHIQDIDK	1;1	2	2	0.1282	8658;12063	548829	68603.6	XP_021375841.1/4.85028e-79/gamma-aminobutyric acid receptor-associated protein-like 2 [Mizuhopecten yessoensis] &gt;OWF39625.1 Gamma-aminobutyric acid receptor-associated protein-like 2 [Mizuhopecten yessoensis]	P60522/1e-60/GBRL2_RAT Gamma-aminobutyric acid receptor-associated protein-like 2 OS=Rattus norvegicus OX=10116 GN=Gabarapl2 PE=3 SV=1	myi:110464776/8e-80/gamma-aminobutyric acid receptor-associated protein-like 2; K08341 GABA(A) receptor-associated protein	Hs6005768/5e-61/[Z] KOG1654 Microtubule-associated anchor protein involved in autophagy and membrane trafficking	A0A210PT10/9e-79/A0A210PT10_MIZYE Gamma-aminobutyric acid receptor-associated protein-like 2 OS=Mizuhopecten yessoensis OX=6573 GN=KP79_PYT13575 PE=3 SV=1	PF02991/5.2E-48/Autophagy protein Atg8 ubiquitin like	1|IPR004241; Autophagy protein Atg8 ubiquitin-like	biological_process:GO:0006914//autophagy;
625_1	8.66045	NA	16260.1	LGEEFDETTMDGR;STFVIEDGDLVHYQK	1;1	2	2	0.1986	25418;27880	171134	17113.4	XP_019919988.1/7.9822e-75/PREDICTED: fatty acid-binding protein homolog 5 isoform X1 [Crassostrea gigas]	C4N147/8e-28/FABP1_DORPE Sodium/calcium exchanger regulatory protein 1 OS=Doryteuthis pealeii OX=1051067 PE=1 SV=1	myi:110464788/9e-63/fatty acid-binding protein, brain-like; K08756 fatty acid-binding protein 7, brain	CE14430/4e-26/[I] KOG4015 Fatty acid-binding protein FABP	K1PNB6/2e-74/K1PNB6_CRAGI Fatty acid-binding-like protein 5 OS=Crassostrea gigas OX=29159 GN=CGI_10017726 PE=3 SV=1	PF00061/2.6E-14/Lipocalin / cytosolic fatty-acid binding protein family	3|IPR000463; Cytosolic fatty-acid binding|IPR000566; Lipocalin/cytosolic fatty-acid binding domain|IPR031259; Intracellular lipid binding protein	molecular_function:GO:0008289//lipid binding;molecular_function:GO:0008289//lipid binding;GO:0005215//transporter activity;
213_1	2.7719	NA	207985	KPIIHPDQDYENK	1	1	1	0.007	26654	186285	1960.9	XP_022342119.1/3.58119e-170/LOW QUALITY PROTEIN: protein-glutamine gamma-glutamyltransferase 4-like [Crassostrea virginica]	P22735/3e-113/TGM1_HUMAN Protein-glutamine gamma-glutamyltransferase K OS=Homo sapiens OX=9606 GN=TGM1 PE=1 SV=4	myi:110450183/4e-170/protein-glutamine gamma-glutamyltransferase K-like; K05619 transglutaminase 1 [EC:2.3.2.13]	Hs4507475/1e-113/[V] TWOG0528 Blood coagulation factor XIIIa/Transglutaminase	A0A210QPK9/4e-169/A0A210QPK9_MIZYE Protein-glutamine gamma-glutamyltransferase K OS=Mizuhopecten yessoensis OX=6573 GN=KP79_PYT00850 PE=4 SV=1	PF00018/1.7E-9/SH3 domain	3|IPR001452; SH3 domain|IPR001849; Pleckstrin homology domain|IPR002931; Transglutaminase-like	molecular_function:GO:0005515//protein binding;
685_1	4.33022	NA	31554.5	SDPCAVIFMQGR	1	1	1	0.043	23069	44130.1	2758.13	XP_021347937.1/1.16666e-119/copine-3-like isoform X2 [Mizuhopecten yessoensis]	O75131/2e-80/CPNE3_HUMAN Copine-3 OS=Homo sapiens OX=9606 GN=CPNE3 PE=1 SV=1	asn:102384239/1e-52/CARMIL3; capping protein, Arp2/3 and myosin-I linker protein 3; K20493 leucine-rich repeat-containing protein 16	Hs4503015/8e-81/[T] KOG1327 Copine	A0A210R6G2/3e-119/A0A210R6G2_MIZYE Copine-3 OS=Mizuhopecten yessoensis OX=6573 GN=KP79_PYT13784 PE=4 SV=1	PTHR10857/4.8E-92/--	1|IPR000008; C2 domain	NA
471_1	12.9907	NA	14524.1	DNTGTINFQEFQSLWK;TALTSFGYR;YVTDWQNTFR	1;1;1	3	4	0.2869	28966;13397;21748;21749	1.7842e+07	2.54886e+06	XP_022339691.1/3.65687e-76/programmed cell death protein 6-like isoform X3 [Crassostrea virginica] &gt;XP_022339692.1 programmed cell death protein 6-like isoform X4 [Crassostrea virginica]	P12815/7e-61/PDCD6_MOUSE Programmed cell death protein 6 OS=Mus musculus OX=10090 GN=Pdcd6 PE=1 SV=2	ngi:103731683/4e-25/Capns2; calpain small subunit 2; K08584 calpain, small subunit 2	Hs20544511/9e-62/[T] KOG0037 Ca2+-binding protein, EF-Hand protein superfamily	A0A1S3HSS3/9e-76/A0A1S3HSS3_LINUN programmed cell death protein 6 isoform X1 OS=Lingula unguis OX=7574 GN=LOC106157854 PE=4 SV=1	PF13833/1.2E-9/EF-hand domain pair	2|IPR002048; EF-hand domain|IPR018247; EF-Hand 1, calcium-binding site	molecular_function:GO:0005509//calcium ion binding;molecular_function:GO:0005509//calcium ion binding;
[truncated: 384 more rows]
